# Supplementary material for: Comparative analysis of primary metabolites and transcriptome changes between ungrafted and pumpkin-grafted watermelon during fruit development
Source: PeerJ. 2020 Jan 6;8:e8259. doi: 10.7717/peerj.8259 (PMC6951286; doi:10.7717/peerj.8259)
Supplement: Supplemental Information 5 [file peerj-08-8259-s005.xlsx]

## Sheet: TableS3
Table S3: Comparison of soluble solids contents between ungrafted and pumpkin grafted watermelon during the course of fruit development.
Replications	Treatmnet	Days after pollination	Soluble Solids Contents	Standard error	Average
1	Ungrafted	10	4	0	4
2	Ungrafted	10	4
3	Ungrafted	10	4
1	Grafted	10	3	0.057735	2.9
2	Grafted	10	2.8
3	Grafted	10	2.9
1	Ungrafted	18	5.4	0.0333333	5.36667
2	Ungrafted	18	5.3
3	Ungrafted	18	5.4
1	Grafted	18	5.3	0.0333333	5.36667
2	Grafted	18	5.4
3	Grafted	18	5.4
1	Ungrafted	26	11	0	11
2	Ungrafted	26	11
3	Ungrafted	26	11
1	Grafted	26	10	0.440959	10.8333
2	Grafted	26	11
3	Grafted	26	11.5
1	Ungrafted	34	12	0.166667	12.1667
2	Ungrafted	34	12.5
3	Ungrafted	34	12
1	Grafted	34	13	0.166667	12.8333
2	Grafted	34	13
3	Grafted	34	12.5
