# Supplementary material for: Comparative analysis of primary metabolites and transcriptome changes between ungrafted and pumpkin-grafted watermelon during fruit development
Source: PeerJ. 2020 Jan 6;8:e8259. doi: 10.7717/peerj.8259 (PMC6951286; doi:10.7717/peerj.8259)
Supplement: Supplemental Information 7 — Green represents abundant sugars. Red represents total sugar contents. DAP (Days after pollination). [file peerj-08-8259-s007.xlsx]

## Sheet: TableS4
Table S5: Comparison of amino acids contents between ungrafted and pumpkin grafted watermelon during course of fruit development.
							Pumpkin grafted							Ungrafted
Index	Compounds	Class	Q1 (Da)	Q3 (Da)	Rt (min)	Days after pollination	Replicate 1	Replicate 2	Replicate 3	Average	Standard error	Total	Share of amino acid (%)	Replicate 1	Replicate 2	Replicate 3	Average	Standard error	Total	Share of amino acid (%)
mab0598	2-Aminoadipic acid (L-Homoglutamic acid)	Amino acids	162.1	97.9	0.84	10	4830000	2820000	2950000	3.53333e+06	649419	110333100	3.20242	948000	902000	807000	885667	41514.4	7.68928e+07	1.15182
mab0598	2-Aminoadipic acid (L-Homoglutamic acid)	Amino acids				18	595000	652000	568000	605000	24758.8	119992000	0.5042	529000	751000	698000	659333	66938.6	1.23311e+08	0.534693
mab0598	2-Aminoadipic acid (L-Homoglutamic acid)	Amino acids				26	1670000	786000	1200000	1.21867e+06	255359	1.23163e+08	0.989477	1310000	1460000	1040000	1270000	122882	108233000	1.17339
mab0598	2-Aminoadipic acid (L-Homoglutamic acid)	Amino acids				34	1650000	1080000	1410000	1380000	165227	1.20567e+08	1.14459	813000	686000	894000	797667	60531.9	1.0527e+08	0.757732
mab0807	L-Proline	Amino acids	116.1	70.1	0.83	10	2320000	2100000	2190000	2.20333e+06	63857.5	110333100	1.99698	2170000	2440000	1820000	2.14333e+06	179475	7.68928e+07	2.78743
mab0807	L-Proline	Amino acids				18	4330000	4290000	4150000	4.25667e+06	54569	119992000	3.54746	4700000	5470000	5490000	5220000	260064	1.23311e+08	4.23321
mab0807	L-Proline	Amino acids				26	5290000	4880000	5850000	5340000	281129	1.23163e+08	4.33573	4270000	5160000	6090000	5.17333e+06	525431	108233000	4.77981
mab0807	L-Proline	Amino acids				34	3520000	3870000	3760000	3.71667e+06	103333	1.20567e+08	3.08265	3710000	3700000	3930000	3780000	75055.5	1.0527e+08	3.59076
mab0808	L-Citrulline	Amino acids	174.1	131.1	0.73	10	448000	476000	420000	448000	16165.8	110333100	0.406043	624000	530000	522000	558667	32748.2	7.68928e+07	0.726553
mab0808	L-Citrulline	Amino acids				18	1330000	1540000	1320000	1.39667e+06	71724.8	119992000	1.16397	1300000	1630000	1390000	1440000	98488.6	1.23311e+08	1.16778
mab0808	L-Citrulline	Amino acids				26	2220000	1660000	1770000	1.88333e+06	171302	1.23163e+08	1.52914	1560000	2100000	2340000	2000000	230651	108233000	1.84787
mab0808	L-Citrulline	Amino acids				34	1750000	2540000	2380000	2.22333e+06	241132	1.20567e+08	1.84406	2110000	2030000	1990000	2.04333e+06	35276.7	1.0527e+08	1.94103
mab0812	L-Glutamic acid	Amino acids	146.1	102	0.7	10	2920000	3980000	2820000	3240000	371124	110333100	2.93656	2750000	2850000	2550000	2.71667e+06	88191.7	7.68928e+07	3.53306
mab0812	L-Glutamic acid	Amino acids				18	4940000	4360000	4510000	4.60333e+06	173813	119992000	3.83637	3480000	3530000	3680000	3.56333e+06	60092.5	1.23311e+08	2.88972
mab0812	L-Glutamic acid	Amino acids				26	5150000	4330000	5380000	4.95333e+06	318660	1.23163e+08	4.02178	4320000	3710000	5370000	4.46667e+06	484779	108233000	4.1269
mab0812	L-Glutamic acid	Amino acids				34	9370000	11000000	7810000	9.39333e+06	920948	1.20567e+08	7.79094	12700000	15500000	14300000	1.41667e+07	811035	1.0527e+08	13.4574
mab0815	L-Leucine	Amino acids	130.1	84	1.22	10	5310000	6530000	6940000	6260000	489524	110333100	5.67373	4620000	3980000	3660000	4.08667e+06	282213	7.68928e+07	5.31476
mab0815	L-Leucine	Amino acids				18	5510000	4900000	5290000	5.23333e+06	178357	119992000	4.3614	5380000	5650000	5240000	5.42333e+06	120324	1.23311e+08	4.39811
mab0815	L-Leucine	Amino acids				26	7170000	5970000	5620000	6.25333e+06	469338	1.23163e+08	5.0773	4450000	4700000	4430000	4.52667e+06	86858.8	108233000	4.18234
mab0815	L-Leucine	Amino acids				34	6280000	6280000	6380000	6.31333e+06	33333.3	1.20567e+08	5.23635	3450000	3710000	3120000	3.42667e+06	170717	1.0527e+08	3.25511
mab0816	L-Phenylalanine	Amino acids	164.1	103	1.95	10	3080000	4020000	4180000	3760000	343123	110333100	3.40786	2420000	2370000	1900000	2230000	165630	7.68928e+07	2.90014
mab0816	L-Phenylalanine	Amino acids				18	3590000	3590000	3540000	3.57333e+06	16666.7	119992000	2.97798	4110000	4280000	4020000	4.13667e+06	76230.6	1.23311e+08	3.35467
mab0816	L-Phenylalanine	Amino acids				26	4760000	4170000	4440000	4.45667e+06	170522	1.23163e+08	3.61852	3150000	3300000	3660000	3370000	151327	108233000	3.11365
mab0816	L-Phenylalanine	Amino acids				34	4890000	4630000	4400000	4640000	141539	1.20567e+08	3.84847	3190000	3360000	2640000	3.06333e+06	217281	1.0527e+08	2.90997
mab0818	L-Threonine	Amino acids	118	73.9	0.73	10	325000	266000	276000	289000	18230	110333100	0.261934	284000	266000	270000	273333	5456.9	7.68928e+07	0.355473
mab0818	L-Threonine	Amino acids				18	336000	369000	385000	363333	14426.1	119992000	0.302798	316000	325000	372000	337667	17362.2	1.23311e+08	0.273834
mab0818	L-Threonine	Amino acids				26	374000	348000	427000	383000	23245.1	1.23163e+08	0.310971	424000	445000	514000	461000	27184.6	108233000	0.425933
mab0818	L-Threonine	Amino acids				34	608000	715000	590000	637667	39014.2	1.20567e+08	0.528888	1290000	1360000	1000000	1.21667e+06	110202	1.0527e+08	1.15575
mab0821	L-(+)-Lysine	Amino acids	147	84	0.69	10	7710000	10100000	7990000	8600000	754343	110333100	7.79458	5730000	3090000	3080000	3.96667e+06	881671	7.68928e+07	5.1587
mab0821	L-(+)-Lysine	Amino acids				18	16600000	13300000	12100000	14000000	1.34536e+06	119992000	11.6674	16500000	22900000	18900000	1.94333e+07	1.86667e+06	1.23311e+08	15.7597
mab0821	L-(+)-Lysine	Amino acids				26	22800000	11900000	14000000	1.62333e+07	3.33883e+06	1.23163e+08	13.1804	17100000	17100000	13000000	1.57333e+07	1.36667e+06	108233000	14.5365
mab0821	L-(+)-Lysine	Amino acids				34	12700000	10300000	7960000	10320000	1.36836e+06	1.20567e+08	8.55953	6220000	7570000	10700000	8.16333e+06	1.32686e+06	1.0527e+08	7.75464
mab0823	L-(-)-Tyrosine	Amino acids	182.1	136.1	1.13	10	9910000	11600000	14300000	1.19367e+07	1.27841e+06	110333100	10.8188	8940000	7270000	4830000	7.01333e+06	1.19338e+06	7.68928e+07	9.12093
mab0823	L-(-)-Tyrosine	Amino acids				18	7940000	8990000	8760000	8.56333e+06	318660	119992000	7.13659	8350000	8440000	8780000	8.52333e+06	130937	1.23311e+08	6.91208
mab0823	L-(-)-Tyrosine	Amino acids				26	12400000	8270000	11800000	1.08233e+07	1.28836e+06	1.23163e+08	8.78784	5460000	5700000	6760000	5.97333e+06	399388	108233000	5.51896
mab0823	L-(-)-Tyrosine	Amino acids				34	11100000	9780000	8890000	9.92333e+06	641985	1.20567e+08	8.23053	3510000	4010000	3510000	3.67667e+06	166667	1.0527e+08	3.4926
mab0825	L-Histidine	Amino acids	156.1	110	0.69	10	1940000	2640000	1510000	2030000	329292	110333100	1.83988	897000	637000	532000	688667	108487	7.68928e+07	0.89562
mab0825	L-Histidine	Amino acids				18	3020000	4290000	4060000	3790000	390683	119992000	3.15854	2300000	3360000	2850000	2.83667e+06	306068	1.23311e+08	2.30042
mab0825	L-Histidine	Amino acids				26	3990000	3290000	5290000	4190000	585947	1.23163e+08	3.402	2160000	2500000	2350000	2.33667e+06	98375.7	108233000	2.15892
mab0825	L-Histidine	Amino acids				34	6230000	4640000	5660000	5510000	465081	1.20567e+08	4.57006	2160000	2410000	2680000	2.41667e+06	150148	1.0527e+08	2.29568
mab0827	L-Valine	Amino acids	118.1	72.1	0.86	10	3190000	3610000	3760000	3520000	170587	110333100	3.19034	2510000	2290000	1770000	2190000	219393	7.68928e+07	2.84812
mab0827	L-Valine	Amino acids				18	2670000	2880000	2670000	2740000	70000	119992000	2.28349	2690000	2970000	2990000	2.88333e+06	96838.9	1.23311e+08	2.33827
mab0827	L-Valine	Amino acids				26	3540000	2900000	3090000	3.17667e+06	189766	1.23163e+08	2.57924	2560000	2400000	2710000	2.55667e+06	89504.8	108233000	2.36219
mab0827	L-Valine	Amino acids				34	3590000	3020000	3180000	3.26333e+06	169738	1.20567e+08	2.70665	1590000	1740000	1450000	1.59333e+06	83732.4	1.0527e+08	1.51356
mab0830	L-(+)-Arginine	Amino acids	175	116	0.74	10	8310000	8970000	8430000	8570000	202978	110333100	7.76739	7550000	7570000	7270000	7.46333e+06	96838.9	7.68928e+07	9.70616
mab0830	L-(+)-Arginine	Amino acids				18	19900000	21300000	21100000	2.07667e+07	437163	119992000	17.3067	21000000	19900000	20900000	20600000	351188	1.23311e+08	16.7058
mab0830	L-(+)-Arginine	Amino acids				26	23700000	20200000	22200000	2.20333e+07	1.01379e+06	1.23163e+08	17.8896	20200000	22700000	20600000	2.11667e+07	775314	108233000	19.5566
mab0830	L-(+)-Arginine	Amino acids				34	15000000	21400000	18000000	1.81333e+07	1.84872e+06	1.20567e+08	15.04	19300000	17900000	20600000	1.92667e+07	779601	1.0527e+08	18.3021
mab0832	L-Tryptophan	Amino acids	203	116	2.44	10	2140000	3600000	3940000	3.22667e+06	552127	110333100	2.92448	1980000	1610000	587000	1.39233e+06	416592	7.68928e+07	1.81075
mab0832	L-Tryptophan	Amino acids				18	1690000	2540000	2490000	2240000	275379	119992000	1.86679	3700000	4180000	3940000	3940000	138564	1.23311e+08	3.19518
mab0832	L-Tryptophan	Amino acids				26	3910000	2520000	3400000	3.27667e+06	405969	1.23163e+08	2.66044	2130000	2470000	3220000	2.60667e+06	321990	108233000	2.40838
mab0832	L-Tryptophan	Amino acids				34	3970000	3850000	3130000	3650000	262298	1.20567e+08	3.02735	2450000	2580000	1510000	2180000	337095	1.0527e+08	2.07086
mab0852	L-Homoserine	Amino acids	120.1	74.1	0.86	10	2850000	2510000	2610000	2.65667e+06	100885	110333100	2.40786	1930000	1740000	1430000	1700000	145717	7.68928e+07	2.21087
mab0852	L-Homoserine	Amino acids				18	1680000	1840000	1520000	1680000	92376	119992000	1.40009	1290000	1760000	1640000	1.56333e+06	140989	1.23311e+08	1.2678
mab0852	L-Homoserine	Amino acids				26	1720000	1470000	1540000	1.57667e+06	74461	1.23163e+08	1.28015	1330000	1310000	1720000	1.45333e+06	133458	108233000	1.34278
mab0852	L-Homoserine	Amino acids				34	1920000	1880000	1940000	1.91333e+06	17638.3	1.20567e+08	1.58694	1610000	1850000	1260000	1.57333e+06	171302	1.0527e+08	1.49456
mab0867	L-Asparagine	Amino acids	131.054	114	0.72	10	655000	674000	732000	687000	23158.9	110333100	0.62266	673000	543000	457000	557667	62783.6	7.68928e+07	0.725252
mab0867	L-Asparagine	Amino acids				18	895000	899000	947000	913667	16706.6	119992000	0.76144	889000	905000	1070000	954667	57851.3	1.23311e+08	0.774196
mab0867	L-Asparagine	Amino acids				26	1070000	897000	1020000	995667	51401.5	1.23163e+08	0.808416	921000	1110000	927000	986000	62024.2	108233000	0.910998
mab0867	L-Asparagine	Amino acids				34	1120000	1350000	1130000	1200000	75055.5	1.20567e+08	0.995294	1160000	1200000	1130000	1.16333e+06	20275.9	1.0527e+08	1.10509
mab0960	L-Methionine	Amino acids	150	61	1.12	10	98400	89900	111000	99766.7	6129.26	110333100	0.0904232	99100	71300	69900	80100	9508.59	7.68928e+07	0.104171
mab0960	L-Methionine	Amino acids				18	195000	178000	190000	187667	5044.25	119992000	0.156399	196000	280000	247000	241000	24433.6	1.23311e+08	0.195441
mab0960	L-Methionine	Amino acids				26	265000	311000	404000	326667	40883.3	1.23163e+08	0.265232	170000	230000	259000	219667	26206.4	108233000	0.202957
mab0960	L-Methionine	Amino acids				34	264000	328000	329000	307000	21501.9	1.20567e+08	0.25463	152000	202000	206000	186667	17371.8	1.0527e+08	0.177321
mab0979	L-Glutamine	Amino acids	145.069	109	0.73	10	12900000	12400000	12500000	12600000	152753	110333100	11.42	9050000	7990000	8520000	8520000	305996	7.68928e+07	11.0804
mab0979	L-Glutamine	Amino acids				18	11500000	13500000	12400000	1.24667e+07	578312	119992000	10.3896	8260000	9980000	11500000	9.91333e+06	935901	1.23311e+08	8.03932
mab0979	L-Glutamine	Amino acids				26	3960000	2890000	2960000	3270000	345591	1.23163e+08	2.65503	4050000	3770000	4070000	3.96333e+06	96838.9	108233000	3.66185
mab0979	L-Glutamine	Amino acids				34	4490000	4270000	3440000	4.06667e+06	319705	1.20567e+08	3.37294	6020000	4880000	7770000	6.22333e+06	840443	1.0527e+08	5.91176
mab5556	L-Alanine	Amino acids	90.048	44	0.85	10	325000	507000	446000	426000	53482.1	110333100	0.386104	304000	356000	309000	323000	16563	7.68928e+07	0.420066
mab5556	L-Alanine	Amino acids				18	177000	130000	150000	152333	13617.8	119992000	0.126953	110000	103000	121000	111333	5238.74	1.23311e+08	0.0902869
mab5556	L-Alanine	Amino acids				26	121000	150000	135000	135333	8373.24	1.23163e+08	0.109882	166000	131000	92000	129667	21372.4	108233000	0.119803
mab5556	L-Alanine	Amino acids				34	140000	140000	108000	129333	10666.7	1.20567e+08	0.107271	168000	206000	234000	202667	19125.3	1.0527e+08	0.19252
mab5598	Ornithine	Amino acid	133	70.1	1.18	10	29900000	29300000	30200000	29800000	264575	110333100	27.0091	27000000	25600000	23300000	25300000	1.07858e+06	7.68928e+07	32.903
mab5598	Ornithine	Amino acid				18	26500000	26400000	25300000	2.60667e+07	384419	119992000	21.7237	24400000	24000000	25100000	24500000	321455	1.23311e+08	19.8685
mab5598	Ornithine	Amino acid				26	26500000	25700000	23700000	25300000	832666	1.23163e+08	20.5419	23000000	22400000	25300000	2.35667e+07	883805	108233000	21.774
mab5598	Ornithine	Amino acid				34	27800000	25700000	25300000	2.62667e+07	775314	1.20567e+08	21.7859	24800000	24600000	22900000	24100000	602771	1.0527e+08	22.8934
mab5607	Cysteine	Amino acid	122	105	1.98	10	6050000	6580000	6710000	6.44667e+06	201853	110333100	5.84291	5180000	4850000	4380000	4.80333e+06	232116	7.68928e+07	6.24679
mab5607	Cysteine	Amino acid				18	6380000	6340000	6460000	6.39333e+06	35276.7	119992000	5.32813	6990000	7070000	7030000	7030000	23094	1.23311e+08	5.70105
mab5607	Cysteine	Amino acid				26	7640000	7130000	7240000	7.33667e+06	154955	1.23163e+08	5.95689	5850000	6320000	6650000	6.27333e+06	232116	108233000	5.79614
mab5607	Cysteine	Amino acid				34	7520000	7630000	7590000	7580000	32145.5	1.20567e+08	6.28694	6130000	6560000	5400000	6030000	338575	1.0527e+08	5.72811
					Total	10	105211400	112772900	113015000	110333100	2.5618e+06			85659100	76955300	68063900	7.68928e+07	5.07939e+06
Note:	Green color represents abundant amino acids					18	119778000	122288000	117910000	119992000	1.26834e+06			116490000	127484000	125958000	1.23311e+08	3.43867e+06
	Red color represent total amino acid contents					26	138250000	109772000	121466000	1.23163e+08	8.26455e+06			104581000	109016000	111102000	108233000	1.92273e+06
	DAP (Days after pollination)					34	123912000	124403000	113387000	1.20567e+08	3.59296e+06			102533000	106054000	107224000	1.0527e+08	1.40972e+06
