# Supplementary material for: Comparative analysis of primary metabolites and transcriptome changes between ungrafted and pumpkin-grafted watermelon during fruit development
Source: PeerJ. 2020 Jan 6;8:e8259. doi: 10.7717/peerj.8259 (PMC6951286; doi:10.7717/peerj.8259)
Supplement: Supplemental Information 8 — Green represents abundant organic acids. Red represents total organic acids content. DAP (Days after pollination). [file peerj-08-8259-s008.xlsx]

## Sheet: TableS6
Table S6: Comparison of organic acids contents between ungrafted and pumpkin grafted watermelon during the course of fruit development.
							Pumpkin grafted							Ungrafted
Index	Compounds	Class	Q1 (Da)	Q3 (Da)	Rt (min)	DAP	Replicate 1	Replicate 2	Replicate 3	Average	Standard error	Total	Share of organic acid (%)	Replicate 1	Replicate 2	Replicate 3	Average	Standard error	Total	Share of organic acid (%)
mab0445	Succinic acid	Organic acids	117.03	99	1.33	10	10000000	12200000	11100000	11100000	635085	471232500	2.35553	9840000	11000000	11300000	1.07133e+07	445172	4.05026e+08	2.6451
mab0445	Succinic acid	Organic acids				18	8200000	9110000	9200000	8.83667e+06	319392	4.90171e+08	1.80277	6310000	8000000	7670000	7.32667e+06	517183	4.43402e+08	1.65237
mab0445	Succinic acid	Organic acids				26	7230000	9350000	8030000	8.20333e+06	618097	4.32002e+08	1.89891	8620000	9510000	10800000	9.64333e+06	632833	3.76467e+08	2.56154
mab0445	Succinic acid	Organic acids				34	14900000	14100000	12200000	1.37333e+07	800694	3.49441e+08	3.93008	15700000	16100000	15100000	1.56333e+07	290593	272333600	5.74051
mab0519	Butanedioldiacetate	Organic acids	173.083	131.072	0.71	10	548000	601000	527000	558667	22017.7	471232500	0.118554	648000	676000	493000	605667	56910.3	4.05026e+08	0.149538
mab0519	Butanedioldiacetate	Organic acids				18	2610000	2530000	2580000	2.57333e+06	23333.3	4.90171e+08	0.524987	2610000	2310000	2010000	2310000	173205	4.43402e+08	0.520971
mab0519	Butanedioldiacetate	Organic acids				26	2780000	2480000	2920000	2.72667e+06	129786	4.32002e+08	0.63117	2460000	2770000	2600000	2610000	89628.9	3.76467e+08	0.693289
mab0519	Butanedioldiacetate	Organic acids				34	3270000	3330000	2700000	3100000	200749	3.49441e+08	0.88713	3790000	3230000	4100000	3.70667e+06	254580	272333600	1.36108
mab0565	Methylglutaric acid	Organic acids	145.06	101.06	0.73	10	133000	113000	96000	114000	10692.7	471232500	0.0241919	73200	71600	79300	74700	2345.92	4.05026e+08	0.0184433
mab0565	Methylglutaric acid	Organic acids				18	116000	141000	135000	130667	7535.1	4.90171e+08	0.0266574	92100	94000	103000	96366.7	3361.71	4.43402e+08	0.0217335
mab0565	Methylglutaric acid	Organic acids				26	36100	22200	25700	28000	4174.13	4.32002e+08	0.00648145	41300	35700	48800	41933.3	3794.88	3.76467e+08	0.0111387
mab0565	Methylglutaric acid	Organic acids				34	37900	40800	29300	36000	3453.02	3.49441e+08	0.0103022	57900	56100	73600	62533.3	5557.68	272333600	0.022962
mab0653	Phosphoric acid	Organic acids	98.9	80.9	1.02	10	9640000	8710000	7410000	8.58667e+06	646692	471232500	1.82217	3800000	3510000	3980000	3.76333e+06	136910	4.05026e+08	0.929159
mab0653	Phosphoric acid	Organic acids				18	6440000	10000000	9920000	8.78667e+06	1.17356e+06	4.90171e+08	1.79257	5230000	6420000	6680000	6110000	446356	4.43402e+08	1.37798
mab0653	Phosphoric acid	Organic acids				26	6940000	5250000	7200000	6.46333e+06	611292	4.32002e+08	1.49614	7020000	5400000	7760000	6.72667e+06	696882	3.76467e+08	1.78679
mab0653	Phosphoric acid	Organic acids				34	10400000	8600000	10500000	9.83333e+06	617342	3.49441e+08	2.81401	7540000	6330000	6520000	6.79667e+06	375692	272333600	2.49571
mab0707	4-Hydroxy-3-methoxymandelate	Organic acids	197	153	0.67	10	62000	57100	69000	62700	3453.02	471232500	0.0133055	39900	65600	69900	58466.7	9365.95	4.05026e+08	0.0144353
mab0707	4-Hydroxy-3-methoxymandelate	Organic acids				18	87200	87800	78700	84566.7	2938.44	4.90171e+08	0.0172525	51800	36600	45800	44733.3	4420.16	4.43402e+08	0.0100887
mab0707	4-Hydroxy-3-methoxymandelate	Organic acids				26	39100	65500	84500	63033.3	13163.8	4.32002e+08	0.014591	23700	14800	9	12836.3	6909.12	3.76467e+08	0.00340969
mab0707	4-Hydroxy-3-methoxymandelate	Organic acids				34	29600	34200	87600	50466.7	18614.1	3.49441e+08	0.0144421	13000	14600	14000	13866.7	466.667	272333600	0.00509179
mab0731	Citramalate	Organic acids	147	87.1	0.97	10	6540000	8040000	5630000	6.73667e+06	702622	471232500	1.42958	7140000	6110000	8320000	7190000	638462	4.05026e+08	1.7752
mab0731	Citramalate	Organic acids				18	1370000	1760000	1490000	1540000	115326	4.90171e+08	0.314176	1460000	1790000	1970000	1740000	149332	4.43402e+08	0.39242
mab0731	Citramalate	Organic acids				26	1060000	1790000	1620000	1490000	220530	4.32002e+08	0.344906	1060000	1010000	1050000	1040000	15275.3	3.76467e+08	0.276253
mab0731	Citramalate	Organic acids				34	740000	589000	790000	706333	60416.1	3.49441e+08	0.202132	781000	499000	480000	586667	97321.3	272333600	0.215422
mab0769	Diethyl phosphate	Organic acids	153	125	1.6	10	809000	1560000	898000	1089000	236897	471232500	0.231096	843000	1040000	775000	886000	79462.8	4.05026e+08	0.218752
mab0769	Diethyl phosphate	Organic acids				18	1690000	937000	858000	1.16167e+06	265149	4.90171e+08	0.236992	836000	1110000	914000	953333	81505.3	4.43402e+08	0.215004
mab0769	Diethyl phosphate	Organic acids				26	1990000	894000	971000	1285000	353200	4.32002e+08	0.297452	926000	722000	898000	848667	63847	3.76467e+08	0.225429
mab0769	Diethyl phosphate	Organic acids				34	1770000	1090000	2360000	1740000	366924	3.49441e+08	0.497937	1480000	1530000	1780000	1.59667e+06	92796.1	272333600	0.586291
mab0770	2-Isopropylmalate	Organic acids	175.1	115	2.74	10	13300000	14500000	12500000	1.34333e+07	581187	471232500	2.85068	5730000	5910000	5830000	5.82333e+06	52068.3	4.05026e+08	1.43777
mab0770	2-Isopropylmalate	Organic acids				18	6690000	7160000	7100000	6.98333e+06	147686	4.90171e+08	1.42467	3330000	4320000	4150000	3.93333e+06	305632	4.43402e+08	0.88708
mab0770	2-Isopropylmalate	Organic acids				26	3450000	3540000	4230000	3740000	246374	4.32002e+08	0.865737	1950000	1940000	2470000	2120000	175024	3.76467e+08	0.563131
mab0770	2-Isopropylmalate	Organic acids				34	10400000	7300000	5470000	7.72333e+06	1.43882e+06	3.49441e+08	2.21019	2680000	3720000	3700000	3.36667e+06	343382	272333600	1.23623
mab0870	Kynurenic acid	Organic acids	190.043	144	2.67	10	33700000	30600000	30900000	3.17333e+07	987140	471232500	6.73411	26000000	24900000	26800000	25900000	550757	4.05026e+08	6.39466
mab0870	Kynurenic acid	Organic acids				18	23100000	18900000	18000000	20000000	1.57162e+06	4.90171e+08	4.08021	14500000	14100000	13800000	1.41333e+07	202759	4.43402e+08	3.18747
mab0870	Kynurenic acid	Organic acids				26	13300000	19500000	17200000	1.66667e+07	1.80954e+06	4.32002e+08	3.85801	12400000	11100000	12700000	1.20667e+07	491031	3.76467e+08	3.20524
mab0870	Kynurenic acid	Organic acids				34	12400000	15200000	14300000	1.39667e+07	825295	3.49441e+08	3.99685	9820000	9970000	11300000	1.03633e+07	470331	272333600	3.80538
mab0878	Azelaic Acid	Organic acids	187.105	125	4.39	10	36000000	39600000	52100000	4.25667e+07	4.87864e+06	471232500	9.03305	41300000	49500000	33700000	41500000	4.56216e+06	4.05026e+08	10.2463
mab0878	Azelaic Acid	Organic acids				18	59100000	41900000	42200000	4.77333e+07	5.68399e+06	4.90171e+08	9.73811	35900000	42600000	38200000	38900000	1.96554e+06	4.43402e+08	8.77307
mab0878	Azelaic Acid	Organic acids				26	32100000	55200000	39300000	42200000	6.82422e+06	4.32002e+08	9.76847	36000000	31400000	33000000	3.34667e+07	1.34825e+06	3.76467e+08	8.88968
mab0878	Azelaic Acid	Organic acids				34	66900000	77600000	61100000	6.85333e+07	4.83264e+06	3.49441e+08	19.6122	41900000	43900000	60500000	4.87667e+07	5.89501e+06	272333600	17.907
mab0882	2-Methylsuccinic acid	Organic acids	131.042	87	2.19	10	6940000	7210000	7400000	7.18333e+06	133458	471232500	1.52437	4660000	4510000	5430000	4.86667e+06	284976	4.05026e+08	1.20157
mab0882	2-Methylsuccinic acid	Organic acids				18	2840000	3560000	3510000	3.30333e+06	232116	4.90171e+08	0.673915	3950000	5240000	4770000	4.65333e+06	376932	4.43402e+08	1.04946
mab0882	2-Methylsuccinic acid	Organic acids				26	3000000	2280000	2190000	2490000	256320	4.32002e+08	0.576386	2970000	2840000	2910000	2.90667e+06	37564.8	3.76467e+08	0.772091
mab0882	2-Methylsuccinic acid	Organic acids				34	3010000	1900000	2540000	2.48333e+06	321680	3.49441e+08	0.710658	1760000	1460000	1870000	1.69667e+06	122520	272333600	0.62301
mab0887	Terephthalic acid	Organic acids	165.027	121	2.83	10	3220000	4010000	4210000	3.81333e+06	302232	471232500	0.809225	3260000	3310000	2940000	3170000	115902	4.05026e+08	0.782667
mab0887	Terephthalic acid	Organic acids				18	2860000	3450000	3300000	3.20333e+06	177044	4.90171e+08	0.653514	2730000	2840000	2880000	2.81667e+06	44845.4	4.43402e+08	0.635239
mab0887	Terephthalic acid	Organic acids				26	3840000	3560000	3560000	3.65333e+06	93333.3	4.32002e+08	0.845675	2890000	2680000	2560000	2710000	96436.5	3.76467e+08	0.719851
mab0887	Terephthalic acid	Organic acids				34	3370000	3640000	3710000	3.57333e+06	103655	3.49441e+08	1.02258	3090000	2620000	3160000	2.95667e+06	169542	272333600	1.08568
mab0888	Phthalic acid	Organic acids	165.027	77	2.95	10	212000	218000	300000	243333	28386.2	471232500	0.0516376	231000	203000	170000	201333	17628.9	4.05026e+08	0.0497088
mab0888	Phthalic acid	Organic acids				18	176000	250000	232000	219333	22281	4.90171e+08	0.0447463	166000	209000	192000	189000	12503.3	4.43402e+08	0.0426249
mab0888	Phthalic acid	Organic acids				26	290000	316000	288000	298000	9018.5	4.32002e+08	0.0689812	227000	207000	171000	201667	16384.3	3.76467e+08	0.0535683
mab0888	Phthalic acid	Organic acids				34	261000	293000	251000	268333	12666.7	3.49441e+08	0.0767892	161000	151000	180000	164000	8504.9	272333600	0.0602203
mab0890	4-Guanidinobutyric acid	Organic acids	146.085	87	0.81	10	2240000	2060000	2850000	2.38333e+06	239049	471232500	0.505766	1740000	1600000	1680000	1.67333e+06	40551.8	4.05026e+08	0.413143
mab0890	4-Guanidinobutyric acid	Organic acids				18	1550000	1600000	1520000	1.55667e+06	23333.3	4.90171e+08	0.317576	1400000	1270000	1350000	1340000	37859.4	4.43402e+08	0.302209
mab0890	4-Guanidinobutyric acid	Organic acids				26	1550000	1380000	1470000	1.46667e+06	49103.1	4.32002e+08	0.339505	1600000	1490000	1740000	1610000	72341.8	3.76467e+08	0.427661
mab0890	4-Guanidinobutyric acid	Organic acids				34	12200000	4260000	1910000	6.12333e+06	3.11315e+06	3.49441e+08	1.75232	12300000	16600000	11700000	1.35333e+07	1.54308e+06	272333600	4.9694
mab0891	2-Hydroxyisocaproic acid	Organic acids	131.079	85	3.45	10	197000	360000	218000	258333	51193.5	471232500	0.0548208	155000	135000	139000	143000	6110.1	4.05026e+08	0.0353064
mab0891	2-Hydroxyisocaproic acid	Organic acids				18	274000	348000	351000	324333	25181.6	4.90171e+08	0.0661674	171000	168000	173000	170667	1452.97	4.43402e+08	0.0384902
mab0891	2-Hydroxyisocaproic acid	Organic acids				26	169000	195000	156000	173333	11464.9	4.32002e+08	0.0401233	119000	147000	115000	127000	10066.4	3.76467e+08	0.0337347
mab0891	2-Hydroxyisocaproic acid	Organic acids				34	210000	203000	148000	187000	19604.4	3.49441e+08	0.053514	204000	239000	253000	232000	14571.7	272333600	0.0851896
mab0894	4-Acetamidobutyric acid	Organic acids	146.074	86	1.34	10	851000	813000	879000	847667	19125.3	471232500	0.179883	484000	484000	712000	560000	76000	4.05026e+08	0.138263
mab0894	4-Acetamidobutyric acid	Organic acids				18	1550000	1630000	1530000	1570000	30550.5	4.90171e+08	0.320297	2240000	2000000	1870000	2.03667e+06	108372	4.43402e+08	0.459327
mab0894	4-Acetamidobutyric acid	Organic acids				26	2040000	1720000	1360000	1.70667e+06	196412	4.32002e+08	0.39506	1880000	1870000	2190000	1980000	105040	3.76467e+08	0.525943
mab0894	4-Acetamidobutyric acid	Organic acids				34	1040000	897000	935000	957333	42764.2	3.49441e+08	0.273961	820000	798000	1050000	889333	80584	272333600	0.32656
mab0930	4-Hydroxybenzoic acid	Organic acids	139.03	95	3.05	10	949000	919000	908000	925333	12252	471232500	0.196364	769000	682000	982000	811000	89112.3	4.05026e+08	0.200234
mab0930	4-Hydroxybenzoic acid	Organic acids				18	180000	87400	113000	126800	27607.5	4.90171e+08	0.0258685	103000	107000	114000	108000	3214.55	4.43402e+08	0.0243571
mab0930	4-Hydroxybenzoic acid	Organic acids				26	65700	126000	98800	96833.3	17434.9	4.32002e+08	0.022415	52600	41000	74600	56066.7	9853.14	3.76467e+08	0.0148929
mab0930	4-Hydroxybenzoic acid	Organic acids				34	291000	309000	184000	261333	39014.2	3.49441e+08	0.074786	211000	255000	335000	267000	36295.1	272333600	0.0980415
mab1018	D-Pantothenic dcid	Organic acids	477.2	258	2.23	10	3980000	3610000	4360000	3.98333e+06	216513	471232500	0.845301	4270000	4590000	4380000	4.41333e+06	93867.5	4.05026e+08	1.08964
mab1018	D-Pantothenic dcid	Organic acids				18	2560000	3280000	3300000	3.04667e+06	243402	4.90171e+08	0.621552	2930000	2950000	2450000	2.77667e+06	163435	4.43402e+08	0.626218
mab1018	D-Pantothenic dcid	Organic acids				26	1600000	2290000	2850000	2.24667e+06	361494	4.32002e+08	0.520059	1690000	1260000	833000	1261000	247395	3.76467e+08	0.334957
mab1018	D-Pantothenic dcid	Organic acids				34	588000	352000	864000	601333	147952	3.49441e+08	0.172084	119000	76700	153000	116233	22069.3	272333600	0.0426805
mab1048	Citric acid	Organic acids	191	111	0.86	10	27600	40500	26300	31466.7	4532.23	471232500	0.00667752	74800	56700	55700	62400	6206.72	4.05026e+08	0.0154064
mab1048	Citric acid	Organic acids				18	154000	137000	139000	143333	5364.49	4.90171e+08	0.0292415	194000	276000	148000	206000	37434.4	4.43402e+08	0.0464589
mab1048	Citric acid	Organic acids				26	957000	993000	1470000	1140000	165327	4.32002e+08	0.263888	1100000	1540000	1360000	1.33333e+06	127715	3.76467e+08	0.35417
mab1048	Citric acid	Organic acids				34	2390000	1650000	3360000	2.46667e+06	495121	3.49441e+08	0.705888	3470000	3600000	2840000	3.30333e+06	234687	272333600	1.21297
mab1060	(S)-(-)-2-Hydroxyisocaproic acid	Organic acids	131.08	85	3.46	10	1840000	3660000	2240000	2580000	552208	471232500	0.5475	1520000	1340000	1310000	1390000	65574.4	4.05026e+08	0.343188
mab1060	(S)-(-)-2-Hydroxyisocaproic acid	Organic acids				18	2660000	3290000	3400000	3.11667e+06	230531	4.90171e+08	0.635833	1600000	1820000	1680000	1700000	64291	4.43402e+08	0.383399
mab1060	(S)-(-)-2-Hydroxyisocaproic acid	Organic acids				26	1620000	1740000	1510000	1.62333e+06	66416.2	4.32002e+08	0.37577	1250000	1290000	972000	1.17067e+06	100002	3.76467e+08	0.310962
mab1060	(S)-(-)-2-Hydroxyisocaproic acid	Organic acids				34	2000000	2090000	1380000	1.82333e+06	223184	3.49441e+08	0.521785	2040000	2340000	2760000	2380000	208806	272333600	0.873928
mab1079	A-Ketoglutaric acid	Organic acids	145	101	1.11	10	189000	355000	210000	251333	52186.6	471232500	0.0533353	231000	217000	195000	214333	10477.5	4.05026e+08	0.0529185
mab1079	A-Ketoglutaric acid	Organic acids				18	132000	101000	98300	110433	10811.5	4.90171e+08	0.0225296	89800	82500	76700	83000	3789.9	4.43402e+08	0.0187189
mab1079	A-Ketoglutaric acid	Organic acids				26	89200	117000	116000	107400	9104.58	4.32002e+08	0.024861	137000	91400	129000	119133	14057.7	3.76467e+08	0.0316451
mab1079	A-Ketoglutaric acid	Organic acids				34	246000	256000	219000	240333	11050.4	3.49441e+08	0.0687764	94200	97800	94900	95633.3	1102.02	272333600	0.0351162
mab1150	Taurocholic acid	Organic acids	556.28	371	10.2	10	1280000	1150000	1190000	1.20667e+06	38441.9	471232500	0.256066	1220000	1210000	1110000	1180000	35118.8	4.05026e+08	0.29134
mab1150	Taurocholic acid	Organic acids				18	1170000	1110000	1170000	1150000	20000	4.90171e+08	0.234612	1200000	1260000	1210000	1.22333e+06	18559.2	4.43402e+08	0.275897
mab1150	Taurocholic acid	Organic acids				26	1150000	1220000	1250000	1.20667e+06	29627.3	4.32002e+08	0.27932	1140000	1110000	1150000	1.13333e+06	12018.5	3.76467e+08	0.301045
mab1150	Taurocholic acid	Organic acids				34	1260000	1290000	1190000	1.24667e+06	29627.3	3.49441e+08	0.35676	1150000	1200000	1210000	1.18667e+06	18559.2	272333600	0.43574
mab1152	2-(Formylamino)benzoic acid	Organic acids	164.04	120	3.78	10	182000	219000	241000	214000	17214.3	471232500	0.0454128	230000	268000	184000	227333	24285.3	4.05026e+08	0.0561281
mab1152	2-(Formylamino)benzoic acid	Organic acids				18	115000	75200	74300	88166.7	13419.2	4.90171e+08	0.0179869	108000	164000	148000	140000	16653.3	4.43402e+08	0.031574
mab1152	2-(Formylamino)benzoic acid	Organic acids				26	237000	660000	246000	381000	139524	4.32002e+08	0.088194	440000	671000	505000	538667	68775.8	3.76467e+08	0.143085
mab1152	2-(Formylamino)benzoic acid	Organic acids				34	2150000	4290000	2630000	3.02333e+06	648314	3.49441e+08	0.86519	5740000	6480000	6150000	6.12333e+06	214035	272333600	2.24847
mab1188	5-hydroxyhexanoic acid	Organic acids	131.08	85	2.73	10	1090000	1160000	1040000	1.09667e+06	34801	471232500	0.232723	532000	482000	580000	531333	28292.1	4.05026e+08	0.131185
mab1188	5-hydroxyhexanoic acid	Organic acids				18	511000	540000	493000	514667	13691	4.90171e+08	0.104997	208000	325000	301000	278000	35679.1	4.43402e+08	0.062697
mab1188	5-hydroxyhexanoic acid	Organic acids				26	268000	257000	313000	279333	17130.2	4.32002e+08	0.0646602	162000	154000	211000	175667	17817	3.76467e+08	0.0466619
mab1188	5-hydroxyhexanoic acid	Organic acids				34	912000	551000	426000	629667	145706	3.49441e+08	0.180192	160000	264000	265000	229667	34834.5	272333600	0.0843328
mab5561	L(-)-Malic acid	Organic acids	133	73	1.06	10	309000000	303000000	293000000	3.01667e+08	4.66667e+06	471232500	64.0165	249000000	252000000	293000000	2.64667e+08	1.41931e+07	4.05026e+08	65.3457
mab5561	L(-)-Malic acid	Organic acids				18	337000000	369000000	326000000	344000000	1.2897e+07	4.90171e+08	70.1796	336000000	320000000	312000000	3.22667e+08	7.05534e+06	4.43402e+08	72.7706
mab5561	L(-)-Malic acid	Organic acids				26	303000000	312000000	302000000	3.05667e+08	3.1798e+06	4.32002e+08	70.7559	270000000	259000000	281000000	270000000	6.35085e+06	3.76467e+08	71.7195
mab5561	L(-)-Malic acid	Organic acids				34	190000000	190000000	187000000	189000000	1000000	3.49441e+08	54.0863	131000000	122000000	153000000	1.35333e+08	9.20748e+06	272333600	49.694
mab5562	Fumaric acid	Organic acids	115	71	1.08	10	28000000	29500000	28200000	2.85667e+07	470225	471232500	6.06212	23600000	24800000	24800000	24400000	400000	4.05026e+08	6.02431
mab5562	Fumaric acid	Organic acids				18	30500000	30400000	28700000	2.98667e+07	584047	4.90171e+08	6.09312	26300000	28600000	27500000	2.74667e+07	664162	4.43402e+08	6.19452
mab5562	Fumaric acid	Organic acids				26	27900000	26800000	25100000	26600000	814453	4.32002e+08	6.15738	22900000	23300000	21500000	2.25667e+07	545690	3.76467e+08	5.99433
mab5562	Fumaric acid	Organic acids				34	16900000	17600000	16900000	1.71333e+07	233333	3.49441e+08	4.90306	12600000	11700000	14500000	1.29333e+07	825295	272333600	4.74908
					Total	10	470929600	474265600	468502300	471232500	1.6706e+06			387390900	398670900	429014900	4.05026e+08	1.24288e+07
Note:	Green color represents abundant organic acids					18	493635200	511384400	465492300	4.90171e+08	1.33607e+07			449709700	448092100	432405500	4.43402e+08	5.51826e+06
	Red color represent total organic acids content					26	416701100	453745700	425559000	4.32002e+08	1.11685e+07			379058600	361593900	388747409	3.76467e+08	7.94496e+06
	DAP (Days after pollination)					34	357675500	357465000	333183900	3.49441e+08	8.12901e+06			258681100	255231200	303088500	272333600	1.54097e+07
