# Supplementary material for: Comparative analysis of primary metabolites and transcriptome changes between ungrafted and pumpkin-grafted watermelon during fruit development
Source: PeerJ. 2020 Jan 6;8:e8259. doi: 10.7717/peerj.8259 (PMC6951286; doi:10.7717/peerj.8259)
Supplement: Supplemental Information 9 [file peerj-08-8259-s009.xlsx]

## Sheet: TableS7
Table S7: Principle Component Analysis (PCA) loadings and score plot data for metabolites between ungrafted and pumpkin grafted watermelon during the course of fruit development.
			PCA loadings										PCA score plot
	PC1	PC2	PC3	PC4	PC5	PC6	PC7	PC8			PC1	PC2	PC3	PC4	PC5	PC6	PC7	PC8
Time	0.86995	-0.033731	-0.15528	0.083229	0.039664	0.030946	0.0054335	-0.063547		Grafted-10	-14.075	2.9178	-1.2551	0.72928	2.2812	-0.14816	0.2692	7.7577e-15
2-Aminoadipic acid L-Homoglutamic acid	-0.015465	0.067109	-0.083425	0.24488	0.38863	-0.085952	0.24595	0.078962		Grafted-18	-4.6691	-2.3324	-1.1869	-2.7895	-0.33894	1.384	0.31634	7.8791e-15
L-Proline	0.027656	-0.12236	0.039046	-0.07953	0.028222	-0.10475	0.0081732	0.12328		Grafted-26	4.1649	-3.3801	-1.597	0.83388	-0.6476	-1.0898	0.87993	7.9181e-15
L-Citrulline	0.073039	-0.10966	0.024355	-0.070579	-0.038947	0.017689	-0.069425	0.083923		Grafted-34	13.039	0.46613	-3.3256	1.743	0.034796	0.44767	-0.73096	7.9468e-15
L-Glutamic acid	0.066441	0.087839	-0.042004	-0.074572	0.0076991	0.075291	0.085564	0.14108		Ungrafted-10	-13.588	2.2541	0.92945	1.6002	-2.3647	0.090477	-0.16777	7.52e-15
L-Leucine	-0.0049053	-0.04971	-0.10132	0.032591	0.098172	-0.055395	-0.043292	0.090677		Ungrafted-18	-4.2874	-2.1722	0.82417	-2.2717	0.28061	-1.0517	-0.91747	8.0018e-15
L-Phenylalanine	0.011917	-0.05268	-0.081924	-0.013424	0.12916	-0.097864	-0.055073	0.080326		Ungrafted-26	4.9474	-2.8342	4.0135	2.0158	0.95338	0.57965	0.016361	8.1081e-15
L-Threonine	0.057246	0.091101	0.034821	-0.063107	0.011114	0.049222	0.055019	0.0034333		Ungrafted-34	14.469	5.081	1.5974	-1.8611	-0.19879	-0.2121	0.33437	7.7022e-15
L--Lysine	0.020488	-0.1824	0.0045011	-0.12433	0.25532	-0.1414	-0.038091	0.0079272
L---Tyrosine	-0.021593	-0.07326	-0.1671	0.06098	0.11227	-0.081082	-0.042439	-0.18148
L-Histidine	0.051536	-0.12808	-0.19794	-0.10314	0.24657	0.039493	0.018568	-0.02702
L-Valine	-0.010085	-0.060181	-0.095822	0.052138	0.1271	-0.034972	-0.0714	-0.13556
L--Arginine	0.040547	-0.1161	0.019503	-0.12115	0.045283	-0.016241	0.042457	0.044964
L-Tryptophan	0.015077	-0.067413	-0.086724	-0.022511	0.26321	-0.24202	-0.2234	0.12204
L-Homoserine	-0.011266	0.038433	-0.066573	0.028542	0.10825	0.021206	0.0081339	0.043672
L-Asparagine	0.031513	-0.02497	-0.016808	-0.046241	0.062123	-0.0077343	-0.041398	-0.12502
L-Methionine	0.049152	-0.13322	-0.068245	-0.041054	0.054699	-0.15583	-0.076282	-0.23636
L-Glutamine	-0.051655	0.069875	-0.015738	-0.21827	0.086834	0.19862	-0.19655	0.03858
L-Alanine	-0.038801	0.15874	-0.014925	0.072899	0.033578	0.038	0.3166	-0.041424
Ornithine	-0.0049137	0.0093767	-0.029718	0.0061216	0.035175	0.010977	0.022242	-0.058446
Cysteine	0.0088967	-0.030732	-0.045649	-0.0098607	0.074135	-0.059564	-0.035996	-0.069364
Succinic acid	0.015565	0.096737	-0.013511	0.037666	0.0047608	0.11818	0.0039087	0.056473
Butanedioldiacetate	0.084892	-0.12098	0.015915	-0.18328	-0.019303	0.049724	-0.015505	-0.16882
Methylglutaric acid	-0.049382	0.065015	0.017403	-0.253	0.10872	0.27007	-0.20978	-0.10582
Phosphoric acid	0.014663	-0.011664	-0.094922	-0.033791	0.21488	0.1721	0.010265	0.14245
4-Hydroxy-3-methoxymandelate	-0.074448	0.058051	-0.66691	-0.29556	-0.37756	-0.35677	0.043203	0.071672
Citramalate	-0.11741	0.070879	-0.029884	0.15374	-0.048645	-0.15372	0.12748	-0.20589
Diethyl phosphate	0.024185	0.04531	-0.088227	-0.027006	-0.00060476	0.0035242	0.034623	0.23121
2-Isopropylmalate	-0.038675	0.094672	-0.26173	0.0030901	0.13648	0.20163	-0.076355	-0.11926
Kynurenic acid	-0.044545	0.026452	-0.085819	0.051036	0.012426	0.06227	0.15377	0.17812
Azelaic Acid	0.012283	0.030951	-0.098229	-0.0033721	-0.025293	0.095112	-0.12751	-0.2186
2-Methylsuccinic acid	-0.05655	0.0044249	-0.017512	0.034481	0.13417	-0.056599	-0.2507	0.07957
Terephthalic acid	-0.0029326	0.0085713	-0.066779	0.027427	0.017561	-0.020553	0.09929	-0.049289
Phthalic acid	-0.00021056	-0.036659	-0.090132	0.066669	0.01986	-0.032962	0.11767	-0.10552
4-Guanidinobutyric acid	0.066731	0.27613	-0.021403	-0.070168	0.048785	0.065647	0.062994	-0.04771
2-Hydroxyisocaproic acid	-0.0032295	0.033575	-0.094245	-0.14836	0.08377	0.17715	0.22321	0.18165
4-Acetamidobutyric acid	0.014417	-0.18263	0.060875	-0.10485	0.16509	-0.095178	0.005294	0.1378
4-Hydroxybenzoic acid	-0.064893	0.37204	-0.19332	0.14791	-0.068472	-0.0064711	-0.11114	0.047653
D-Pantothenic dcid	-0.14373	-0.25021	-0.11375	0.11077	-0.04224	-0.042322	-0.04873	0.17274
Citric acid	0.22741	-0.064693	0.10707	0.10761	-0.13534	-0.16695	0.1558	0.13496
S---2-Hydroxyisocaproic acid	-0.0032875	0.045249	-0.097115	-0.16125	0.085772	0.16285	0.20415	0.0091613
A-Ketoglutaric acid	-0.018011	0.083271	-0.12167	0.21243	0.032881	0.20509	-0.16658	-0.053534
Taurocholic acid	0.00061072	0.0028566	-0.013195	0.0014128	0.0020876	-0.030208	-0.032047	-0.058254
2-Formylaminobenzoic acid	0.16137	0.36043	0.014761	0.21749	0.0056182	-0.091351	-0.15281	0.16279
5-hydroxyhexanoic acid	-0.044999	0.096621	-0.26057	0.060962	0.11814	0.25193	-0.097972	0.10385
L--Malic acid	-0.029622	-0.099844	-0.016618	-0.013576	0.037289	-0.0058961	0.049253	0.10822
Fumaric acid	-0.029991	-0.078004	-0.024951	-0.012226	0.036036	-0.0088386	0.068524	0.16632
D-Galacturonic acidGalA	0.014415	0.24021	0.14973	-0.21413	0.11103	-0.26162	-0.13603	0.052284
D-Galacturonic acid	0.012041	0.23416	0.16151	-0.2307	0.18379	-0.20203	-0.062242	0.10568
D-glucopyranuronate	0.011374	0.28706	0.10971	-0.23325	0.13653	-0.17005	-0.022613	-0.22109
Sucrose	0.11669	-0.03587	-0.0012786	-0.073754	-0.16291	0.0099251	-0.1141	0.075947
D-Glucuronic acid	0.045313	0.16203	-0.015707	-0.080145	0.052141	-0.15852	-0.069216	0.16082
D--Threose	-0.076307	0.03746	0.018014	0.4072	0.10277	-0.1172	-0.14987	0.030816
Glucosamine	-0.0085552	-0.066436	-0.0043841	-0.0057772	0.2506	-0.043472	0.12964	0.024667
D-Melezitose	0.14217	0.079602	-0.050659	0.0524	-0.020421	-0.08361	-0.0056244	-0.023671
Gluconic acid	0.050997	0.081973	0.092262	-0.031015	-0.01002	0.037139	0.1687	0.12348
D--Glucono-1,5-lactone	0.011237	-0.042928	0.024882	-0.10388	-0.0071768	0.098295	0.13361	0.036535
D-Glucose	0.01152	-0.076813	0.051624	-0.053275	-0.057138	0.068353	-0.07556	0.0007163
D-Sorbitol	0.013697	0.0052869	0.029489	0.021159	-0.0031377	0.021317	-0.022245	-0.22662
Dulcitol	0.056191	0.11047	-0.03712	-0.14948	0.033172	0.08213	0.22621	-0.12682
D-Glucose 6-phosphate	-0.021498	-0.057881	-0.10624	0.0089338	0.14779	0.043715	0.085209	0.093898
D-Mannose-6-phosphate	-0.0067062	-0.068702	-0.058446	0.061064	0.042304	-0.049108	0.080041	-0.17312
D--Trehalose	0.097645	-0.098916	-0.016933	-0.00046959	-0.14197	0.1984	-0.31836	0.23345
D--Cellotriose	0.091556	-0.039895	0.012004	-0.037668	0.029486	0.031781	-0.093936	-0.094513
D-Threose	-0.021789	-0.080797	-0.16033	0.042622	0.10651	-0.066069	-0.061459	-0.1318
delta-Aminolevulinic acid hydrochloride	-0.0026957	-0.00763	-0.037608	0.013183	0.047193	0.0029757	0.0074504	-0.11627
