# Supplementary material for: Comparative analysis of primary metabolites and transcriptome changes between ungrafted and pumpkin-grafted watermelon during fruit development
Source: PeerJ. 2020 Jan 6;8:e8259. doi: 10.7717/peerj.8259 (PMC6951286; doi:10.7717/peerj.8259)
Supplement: Supplemental Information 10 [file peerj-08-8259-s010.xlsx]

## Sheet: TableS8
Table S8: DEGS in all sample comparison
ID	P1_vs_N1	P2_vs_N2	P3_vs_N3	P4_vs_N4	GO	KEGG	KOG	NR	SwissProt	TrEMBL
Cla000045	0	0	3.017	-3.407	GO:0005789,endoplasmic reticulum membrane; GO:0016021,integral component of membrane; GO:0005506,iron ion binding; GO:0031418,L-ascorbic acid binding; GO:0004656,procollagen-proline 4-dioxygenase activity	K00472: P4HA; prolyl 4-hydroxylase [EC:1.14.11.2]	At3g28480	ref|XP_008436994.1|	P4H12_ARATH,RecName: Full=Probable prolyl 4-hydroxylase 12 {ECO:0000305}; Short=AtP4H12 {ECO:0000303|Ref.5}; EC=1.14.11.2 {ECO:0000305};	A0A1S3AT39_CUCME,SubName: Full=probable prolyl 4-hydroxylase 12 {ECO:0000313|RefSeq:XP_008436994.1};
Cla000056	-2.905	0	0	0	--	--	--	ref|XP_008450918.1|	--	A0A1S3BPR5_CUCME,SubName: Full=uncharacterized protein LOC103492365 {ECO:0000313|RefSeq:XP_008450918.1};
Cla000111	0	0	-1.323	0	GO:0005634,nucleus; GO:0003700,DNA binding transcription factor activity; GO:0043565,sequence-specific DNA binding; GO:0009651,response to salt stress; GO:0006351,transcription, DNA-templated	K09338: HD-ZIP; homeobox-leucine zipper protein	At2g01430	ref|XP_011654500.1|	ATB17_ARATH,RecName: Full=Homeobox-leucine zipper protein ATHB-17; AltName: Full=HD-ZIP protein ATHB-17; AltName: Full=Homeodomain transcription factor ATHB-17;	A0A0A0KJE2_CUCSA,SubName: Full=Uncharacterized protein {ECO:0000313|EMBL:KGN49683.1};
Cla000152	-1.389	0	0	0	GO:0009507,chloroplast; GO:0009535,chloroplast thylakoid membrane; GO:0016021,integral component of membrane; GO:0009522,photosystem I; GO:0009579,thylakoid; GO:0009768,photosynthesis, light harvesting in photosystem I; GO:0009767,photosynthetic electron transport chain	--	At1g08380	ref|XP_022142590.1|	PSAO_ARATH,RecName: Full=Photosystem I subunit O; Short=PSI-O; Flags: Precursor;	A0A1S3CJR4_CUCME,SubName: Full=photosystem I subunit O {ECO:0000313|RefSeq:XP_008463649.1};
Cla000198	0	0	1.36	0	GO:0005634,nucleus; GO:0003700,DNA binding transcription factor activity; GO:0043565,sequence-specific DNA binding; GO:0009738,abscisic acid-activated signaling pathway; GO:0009737,response to abscisic acid; GO:0009735,response to cytokinin; GO:0009414,response to water deprivation; GO:0006351,transcription, DNA-templated	K09338: HD-ZIP; homeobox-leucine zipper protein	At4g37790	ref|XP_022136472.1|	HAT22_ARATH,RecName: Full=Homeobox-leucine zipper protein HAT22; AltName: Full=Homeodomain-leucine zipper protein HAT22; Short=HD-ZIP protein 22;	A0A1S3BNL6_CUCME,SubName: Full=homeobox-leucine zipper protein HAT22-like {ECO:0000313|RefSeq:XP_008450165.1};
Cla000225	0	0	0	1.021	GO:0016021,integral component of membrane; GO:0016020,membrane; GO:0020037,heme binding; GO:0005506,iron ion binding; GO:0016709,oxidoreductase activity, acting on paired donors, with incorporation or reduction of molecular oxygen, NAD(P)H as one donor, and incorporation of one atom of oxygen; GO:0044550,secondary metabolite biosynthetic process	K20617: CYP71A; cytochrome P450 family 71 subfamily A	At3g26210	ref|XP_011651857.1|	C71A9_SOYBN,RecName: Full=Cytochrome P450 71A9; EC=1.14.-.-; AltName: Full=Cytochrome P450 CP1;	A0A1S4DW70_CUCME,SubName: Full=cytochrome P450 71A1-like {ECO:0000313|RefSeq:XP_016899955.1};
Cla000228	1.583	0	0	0	GO:0005789,endoplasmic reticulum membrane; GO:0016021,integral component of membrane; GO:0031090,organelle membrane; GO:0020037,heme binding; GO:0005506,iron ion binding; GO:0004497,monooxygenase activity; GO:0016705,oxidoreductase activity, acting on paired donors, with incorporation or reduction of molecular oxygen; GO:0009835,fruit ripening	--	At3g26300	ref|XP_016900043.1|	C71A1_PERAE,RecName: Full=Cytochrome P450 71A1; EC=1.14.-.-; AltName: Full=ARP-2; AltName: Full=CYPLXXIA1;	A0A1S4DVP8_CUCME,SubName: Full=cytochrome P450 71A1-like isoform X1 {ECO:0000313|RefSeq:XP_016900043.1};
Cla000256	0	1.248	0	0	--	--	At3g20340	ref|XP_022936225.1|	--	A0A1U8J884_GOSHI,SubName: Full=uncharacterized protein LOC107903327 {ECO:0000313|RefSeq:XP_016684833.1};
Cla000287	0	0	0	-1.733	GO:0016210,naringenin-chalcone synthase activity; GO:0009813,flavonoid biosynthetic process	K00660: CHS; chalcone synthase [EC:2.3.1.74]	At5g13930	ref|XP_004145707.1|	CHS2_CITSI,RecName: Full=Chalcone synthase 2; EC=2.3.1.74; AltName: Full=Naringenin-chalcone synthase 2;	A0A0A0LDT8_CUCSA,SubName: Full=Uncharacterized protein {ECO:0000313|EMBL:KGN58261.1};
Cla000300	0	0	-1.56	0	GO:0009507,chloroplast	--	At4g27670	gb|ADU55784.1|	HS22C_SOYBN,RecName: Full=Small heat shock protein, chloroplastic; Flags: Fragment;	H6TB37_CITLA,SubName: Full=HSP25.5 {ECO:0000313|EMBL:ADU55784.1};
Cla000301	0	0	-1.892	-1.407	--	--	At5g03890	ref|XP_011654573.1|	--	A0A0A0KN21_CUCSA,SubName: Full=Uncharacterized protein {ECO:0000313|EMBL:KGN49817.1};
Cla000305	0	0	0	-1.482	GO:0046658,anchored component of plasma membrane; GO:0005789,endoplasmic reticulum membrane; GO:0016021,integral component of membrane; GO:0009506,plasmodesma; GO:0004871,signal transducer activity; GO:0006952,defense response	--	At5g53730	ref|XP_008437662.1|	NHL26_ARATH,RecName: Full=NDR1/HIN1-like protein 26 {ECO:0000303|Ref.4};	A0A1S3AUK3_CUCME,SubName: Full=NDR1/HIN1-like protein 12 {ECO:0000313|RefSeq:XP_008437662.1};
Cla000310	0	-2.292	0	-2.841	GO:0010438,cellular response to sulfur starvation; GO:0009658,chloroplast organization; GO:0042742,defense response to bacterium; GO:0002229,defense response to oomycetes; GO:0045893,positive regulation of transcription, DNA-templated; GO:0031347,regulation of defense response; GO:0047484,regulation of response to osmotic stress; GO:0009651,response to salt stress	--	--	ref|XP_008437659.1|	LSU2_ARATH,RecName: Full=Protein RESPONSE TO LOW SULFUR 2 {ECO:0000303|PubMed:25628631}; AltName: Full=Protein ENHANCED DE-ETIOLATION 6 {ECO:0000303|PubMed:22383539};	A0A1S3AV51_CUCME,SubName: Full=uncharacterized protein LOC103482998 {ECO:0000313|RefSeq:XP_008437659.1};
Cla000347	0	0	-1.006	0	--	--	--	--	--	--
Cla000388	-2.476	0	0	0	GO:0005634,nucleus; GO:0009737,response to abscisic acid; GO:0009414,response to water deprivation; GO:0007165,signal transduction	--	At1g13740	ref|XP_008446443.1|	AFP2_ARATH,RecName: Full=Ninja-family protein AFP2; AltName: Full=ABI five-binding protein 2; Short=ABI5-binding protein 2;	A0A1S3BFW9_CUCME,SubName: Full=ninja-family protein AFP3-like {ECO:0000313|RefSeq:XP_008446443.1};
Cla000466	0	1.489	0	0	GO:0050662,coenzyme binding; GO:0016491,oxidoreductase activity; GO:0009813,flavonoid biosynthetic process	--	At4g27250	ref|XP_011650548.1|	ANR_GINBI,RecName: Full=Putative anthocyanidin reductase {ECO:0000303|PubMed:16399014}; Short=GbANR {ECO:0000303|PubMed:16399014}; EC=1.3.1.- {ECO:0000250|UniProtKB:Q5FB34};	A0A1S3BSY6_CUCME,SubName: Full=dihydroflavonol-4-reductase isoform X8 {ECO:0000313|RefSeq:XP_008452321.1};
Cla000480	-1.553	0	0	0	GO:0050660,flavin adenine dinucleotide binding; GO:0004497,monooxygenase activity; GO:0004499,N,N-dimethylaniline monooxygenase activity; GO:0050661,NADP binding; GO:0071456,cellular response to hypoxia; GO:0009870,defense response signaling pathway, resistance gene-dependent; GO:0010204,defense response signaling pathway, resistance gene-independent; GO:0042742,defense response to bacterium; GO:…	K00485: FMO; dimethylaniline monooxygenase (N-oxide forming) [EC:1.14.13.8]	At1g19250	ref|XP_008448196.1|	FMO1_ARATH,RecName: Full=Probable flavin-containing monooxygenase 1; EC=1.14.13.-;	A0A1S3BK04_CUCME,RecName: Full=Flavin-containing monooxygenase {ECO:0000256|RuleBase:RU361177}; EC=1.-.-.- {ECO:0000256|RuleBase:RU361177};
Cla000582	0	1.222	0	0	GO:0005634,nucleus; GO:0003677,DNA binding; GO:0003700,DNA binding transcription factor activity; GO:0006355,regulation of transcription, DNA-templated; GO:0006351,transcription, DNA-templated	--	At1g69580	ref|XP_004138915.1|	PHL8_ARATH,RecName: Full=Myb family transcription factor PHL8 {ECO:0000305}; AltName: Full=Protein PHR1-LIKE 8 {ECO:0000305};	A0A0A0LJX4_CUCSA,SubName: Full=Uncharacterized protein {ECO:0000313|EMBL:KGN61374.1};
Cla000585	0	-1.457	0	0	GO:0005618,cell wall; GO:0005576,extracellular region; GO:0016020,membrane; GO:0009664,plant-type cell wall organization	K20628: exlX; expansin	At1g69530	ref|XP_008441714.1|	EXPA1_ARATH,RecName: Full=Expansin-A1; Short=AtEXPA1; AltName: Full=Alpha-expansin-1; Short=At-EXP1; Short=AtEx1; AltName: Full=Ath-ExpAlpha-1.2; Flags: Precursor;	A0A1S3B4Q1_CUCME,SubName: Full=expansin-A15 {ECO:0000313|RefSeq:XP_008441714.1};
Cla000604	2.493	0	0	0	--	--	--	ref|XP_008450228.1|	--	A0A1S3BNR3_CUCME,SubName: Full=dof zinc finger protein DOF5.7 {ECO:0000313|RefSeq:XP_008450228.1};
Cla000628	0	0	-2.313	0	--	--	At3g02640	ref|XP_004138889.1|	--	A0A0A0LHB3_CUCSA,SubName: Full=Uncharacterized protein {ECO:0000313|EMBL:KGN61330.1};
Cla000664	0	0	0	-1.137	--	--	--	--	--	--
Cla000706	-1.203	0	0	0	--	--	At1g45688	ref|XP_008440289.1|	--	A0A1S3B0C4_CUCME,SubName: Full=uncharacterized protein LOC103484782 {ECO:0000313|RefSeq:XP_008440289.1};
Cla000753	-2.956	0	0	0	GO:0005759,mitochondrial matrix; GO:0003863,3-methyl-2-oxobutanoate dehydrogenase (2-methylpropanoyl-transferring) activity; GO:0046872,metal ion binding; GO:0043617,cellular response to sucrose starvation; GO:0009646,response to absence of light; GO:0009744,response to sucrose	K00166: BCKDHA, bkdA1; 2-oxoisovalerate dehydrogenase E1 component alpha subunit [EC:1.2.4.4]	At1g21400	ref|XP_023536387.1|	ODBA1_ARATH,RecName: Full=2-oxoisovalerate dehydrogenase subunit alpha 1, mitochondrial; EC=1.2.4.4; AltName: Full=Branched-chain alpha-keto acid dehydrogenase E1 component alpha chain; Short=BCKDE1A; Short=BCKDH E1-alpha; Flags: Precursor;	A0A1S3BD09_CUCME,SubName: Full=2-oxoisovalerate dehydrogenase subunit alpha 1, mitochondrial {ECO:0000313|RefSeq:XP_008445779.1};
Cla000765	0	0	0	1.198	GO:0016021,integral component of membrane; GO:0005622,intracellular; GO:0005886,plasma membrane; GO:0005509,calcium ion binding; GO:0016174,NAD(P)H oxidase activity; GO:0004601,peroxidase activity; GO:0009738,abscisic acid-activated signaling pathway; GO:0033500,carbohydrate homeostasis; GO:0052542,defense response by callose deposition; GO:0009873,ethylene-activated signaling pathway; GO:0050665…	K13447: RBOH; respiratory burst oxidase [EC:1.6.3.- 1.11.1.-]	At1g64060	gb|KGN53361.1|	RBOHF_ARATH,RecName: Full=Respiratory burst oxidase homolog protein F; EC=1.11.1.-; EC=1.6.3.-; AltName: Full=Cytochrome b245 beta chain homolog RbohAp108; AltName: Full=NADPH oxidase RBOHF; Short=AtRBOHF;	A0A0A0KZQ2_CUCSA,SubName: Full=Uncharacterized protein {ECO:0000313|EMBL:KGN53361.1};
Cla000802	1.129	0	0	0	GO:0005618,cell wall; GO:0005576,extracellular region; GO:0004650,polygalacturonase activity; GO:0005975,carbohydrate metabolic process; GO:0009831,plant-type cell wall modification involved in multidimensional cell growth	K01213: E3.2.1.67; galacturan 1,4-alpha-galacturonidase [EC:3.2.1.67]	At1g60590	ref|XP_022961637.1|	PGLR4_ARATH,RecName: Full=Polygalacturonase At1g48100; Short=PG; EC=3.2.1.15; AltName: Full=Pectinase At1g48100; Flags: Precursor;	A0A0A0LNA5_CUCSA,SubName: Full=Uncharacterized protein {ECO:0000313|EMBL:KGN62292.1};
Cla000817	-1.51	0	0	0	GO:0005576,extracellular region; GO:0004857,enzyme inhibitor activity	--	At1g23350	ref|XP_004143062.2|	PLA1_PLAAC,RecName: Full=Putative invertase inhibitor; AltName: Full=Pollen allergen Pla a 1; AltName: Allergen=Pla a 1; Flags: Precursor;	A0A0A0LNC2_CUCSA,SubName: Full=Invertase/pectin methylesterase inhibitor family protein {ECO:0000313|EMBL:KGN62312.1};
Cla000827	-4.337	0	0	0	GO:0005634,nucleus; GO:0003677,DNA binding; GO:0003700,DNA binding transcription factor activity; GO:0045892,negative regulation of transcription, DNA-templated; GO:0006351,transcription, DNA-templated	K08064: NFYA; nuclear transcription factor Y, alpha	At1g30500	ref|XP_008460780.1|	NFYA7_ARATH,RecName: Full=Nuclear transcription factor Y subunit A-7; Short=AtNF-YA-7;	A0A1S3CEE5_CUCME,SubName: Full=nuclear transcription factor Y subunit A-7-like {ECO:0000313|RefSeq:XP_008460780.1};
Cla000855	-2.039	0	0	0	GO:0005634,nucleus; GO:0003677,DNA binding; GO:0003700,DNA binding transcription factor activity; GO:0009873,ethylene-activated signaling pathway; GO:0048527,lateral root development; GO:0048366,leaf development; GO:0009910,negative regulation of flower development; GO:0045892,negative regulation of transcription, DNA-templated; GO:0009741,response to brassinosteroid; GO:0006351,transcription, DN…	K09287: RAV; RAV-like factor	At1g13260	ref|XP_004151060.1|	RAV1_ARATH,RecName: Full=AP2/ERF and B3 domain-containing transcription factor RAV1; AltName: Full=Ethylene-responsive transcription factor RAV1; AltName: Full=Protein RELATED TO ABI3/VP1 1;	A0A1S3CPL6_CUCME,SubName: Full=AP2/ERF and B3 domain-containing transcription factor RAV1-like {ECO:0000313|RefSeq:XP_008465773.1};
Cla000895	-1.029	0	1.555	0	--	--	At1g52140	ref|XP_023000392.1|	--	A0A0A0K800_CUCSA,SubName: Full=Uncharacterized protein {ECO:0000313|EMBL:KGN45588.1};
Cla000982	-1.518	0	0	0	--	--	At1g10660	ref|XP_008438531.1|	--	A0A1S3AW93_CUCME,SubName: Full=uncharacterized protein LOC103483587 isoform X2 {ECO:0000313|RefSeq:XP_008438531.1};
Cla000996	1.077	0	0	0	GO:0046872,metal ion binding; GO:0004842,ubiquitin-protein transferase activity; GO:0006952,defense response; GO:0043161,proteasome-mediated ubiquitin-dependent protein catabolic process; GO:0043067,regulation of programmed cell death	K19042: BOI; E3 ubiquitin-protein ligase BOI and related proteins [EC:2.3.2.27]	At5g45100	ref|XP_004145480.2|	BRG1_ARATH,RecName: Full=BOI-related E3 ubiquitin-protein ligase 1; EC=2.3.2.27 {ECO:0000269|PubMed:20921156}; AltName: Full=RING-type E3 ubiquitin transferase BRG1 {ECO:0000305};	A0A0A0M3V5_CUCSA,SubName: Full=Uncharacterized protein {ECO:0000313|EMBL:KGN66896.1};
Cla001045	-1.095	0	0	0	GO:0016021,integral component of membrane	--	At5g22870	ref|XP_008464346.1|	Y1816_ARATH,RecName: Full=Uncharacterized protein At1g08160;	A0A1S3CLP6_CUCME,SubName: Full=uncharacterized protein At1g08160 {ECO:0000313|RefSeq:XP_008464346.1};
Cla001049	-1.276	0	0	0	--	--	--	ref|XP_004139454.1|	--	A0A0A0LSV0_CUCSA,SubName: Full=Uncharacterized protein {ECO:0000313|EMBL:KGN64868.1};
Cla001050	0	0	1.31	0	--	--	--	gb|KGN64869.1|	--	A0A0A0LV74_CUCSA,SubName: Full=Uncharacterized protein {ECO:0000313|EMBL:KGN64869.1};
Cla001061	-1.344	0	0	0	--	--	--	ref|XP_010111529.1|	--	W9S869_9ROSA,SubName: Full=Uncharacterized protein {ECO:0000313|EMBL:EXC31162.1};
Cla001067	-1.064	0	0	0	GO:0005634,nucleus; GO:0003700,DNA binding transcription factor activity; GO:0042803,protein homodimerization activity; GO:0043565,sequence-specific DNA binding; GO:0048653,anther development; GO:0071588,hydrogen peroxide mediated signaling pathway; GO:0002237,response to molecule of bacterial origin; GO:0006351,transcription, DNA-templated	K14431: TGA; transcription factor TGA	At1g08320_1	ref|XP_011654412.1|	TGA9_ARATH,RecName: Full=Transcription factor TGA9 {ECO:0000303|PubMed:20805327}; AltName: Full=Protein TGACG (TGA) motif-binding protein 9 {ECO:0000303|PubMed:20805327}; AltName: Full=bZIP transcription factor 21 {ECO:0000303|PubMed:11906833}; Short=AtbZIP21 {ECO:0000303|PubMed:11906833};	A0A1S3CEU5_CUCME,SubName: Full=transcription factor HBP-1b(C38)-like {ECO:0000313|RefSeq:XP_008461530.1};
Cla001089	-1.089	0	0	0	--	--	At5g22390	ref|XP_008461212.1|	--	A0A1S3CEL7_CUCME,SubName: Full=protein FAF-like, chloroplastic {ECO:0000313|RefSeq:XP_008461212.1};
Cla001228	0	0	0	-2.668	GO:0005089,Rho guanyl-nucleotide exchange factor activity	--	At4g00460	ref|XP_004138590.1|	ROGF3_ARATH,RecName: Full=Rop guanine nucleotide exchange factor 3; Short=AtRopGEF3; AltName: Full=Rho of plants guanine nucleotide exchange factor 3;	A0A0A0K849_CUCSA,SubName: Full=Uncharacterized protein {ECO:0000313|EMBL:KGN45658.1};
Cla001235	1.924	0	0	0	GO:0016021,integral component of membrane; GO:0018685,alkane 1-monooxygenase activity; GO:0070330,aromatase activity; GO:0020037,heme binding; GO:0005506,iron ion binding; GO:0006631,fatty acid metabolic process	K15398: CYP86A4S; fatty acid omega-hydroxylase [EC:1.14.-.-]	At2g45970	ref|XP_008458223.1|	C86A8_ARATH,RecName: Full=Cytochrome P450 86A8; EC=1.14.14.1; AltName: Full=Protein LACERATA;	A0A1S3C7C5_CUCME,SubName: Full=cytochrome P450 86A8-like {ECO:0000313|RefSeq:XP_008458223.1};
Cla001254	-1.157	0	0	-1.802	GO:0016021,integral component of membrane; GO:0005524,ATP binding; GO:0004674,protein serine/threonine kinase activity; GO:0009960,endosperm development	K00924: E2.7.1.-; kinase [EC:2.7.1.-]	At3g19700	ref|XP_008455077.1|	IKU2_ARATH,RecName: Full=Receptor-like protein kinase HAIKU2; EC=2.7.11.1; Flags: Precursor;	A0A1S3C065_CUCME,SubName: Full=receptor-like protein kinase HAIKU2 {ECO:0000313|RefSeq:XP_008455077.1};
Cla001268	0	0	0	1.744	GO:0005737,cytoplasm	K13993: HSP20; HSP20 family protein	At1g53540	ref|XP_008450042.1|	HSP11_MEDSA,RecName: Full=18.1 kDa class I heat shock protein; Flags: Fragment;	A0A1S3BNE8_CUCME,SubName: Full=class I heat shock protein-like {ECO:0000313|RefSeq:XP_008450042.1};
Cla001290	-2.546	0	0	0	GO:0051213,dioxygenase activity; GO:0046872,metal ion binding; GO:0002229,defense response to oomycetes; GO:0046244,salicylic acid catabolic process	--	At4g10490	ref|XP_008462885.1|	DLO2_ARATH,RecName: Full=Protein DMR6-LIKE OXYGENASE 2 {ECO:0000303|PubMed:25376907}; EC=1.14.11.- {ECO:0000255|PROSITE-ProRule:PRU00805}; AltName: Full=2-oxoglutarate (2OG)-Fe(II) oxygenase-like protein DLO2 {ECO:0000303|PubMed:25376907}; AltName: Full=Salicylate 3-hydroxylase DLO2 {ECO:0000305}; Short=S3H DLO2 {ECO:0000305}; Short=SA 3-hydroxylase DLO2 {ECO:0000305}; Short=Salicylic acid 3-hydr…	A0A1S3CJI6_CUCME,SubName: Full=protein DMR6-LIKE OXYGENASE 2-like {ECO:0000313|RefSeq:XP_008462885.1};
Cla001298	1.209	0	0	0	GO:0051213,dioxygenase activity; GO:0046872,metal ion binding	K05282: E1.14.11.12; gibberellin-44 dioxygenase [EC:1.14.11.12]	At1g52820	ref|XP_008454372.1|	AOP1L_ARATH,RecName: Full=Probable 2-oxoglutarate-dependent dioxygenase AOP1.2; EC=1.14.11.-;	A0A1S3BYJ6_CUCME,SubName: Full=probable 2-oxoglutarate-dependent dioxygenase AOP1 {ECO:0000313|RefSeq:XP_008454372.1};
Cla001315	0	0	0	-1.931	GO:0005887,integral component of plasma membrane; GO:0005886,plasma membrane; GO:0042802,identical protein binding; GO:0009793,embryo development ending in seed dormancy; GO:0009553,embryo sac development; GO:0009555,pollen development	K18171: CMC1; COX assembly mitochondrial protein 1	At5g55490	ref|XP_004152367.1|	GEX1_ARATH,RecName: Full=Protein GAMETE EXPRESSED 1; Flags: Precursor;	A0A1S3BZN2_CUCME,SubName: Full=protein GAMETE EXPRESSED 1 isoform X1 {ECO:0000313|RefSeq:XP_008454365.1};
Cla001343	-2.153	0	0	0	--	--	At4g05070	gb|KGN49179.1|	--	A0A0A0KK17_CUCSA,SubName: Full=Uncharacterized protein {ECO:0000313|EMBL:KGN49179.1};
Cla001349	0	1.764	0	0	GO:0005634,nucleus; GO:0016567,protein ubiquitination	--	At4g21510	ref|XP_008439907.1|	SKI27_ARATH,RecName: Full=F-box protein SKIP27; AltName: Full=SKP1-interacting partner 27;	A0A1S3B0I0_CUCME,SubName: Full=F-box protein At4g05010-like {ECO:0000313|RefSeq:XP_008439907.1};
Cla001351	0	0	0	-1.009	--	--	At4g21620	ref|XP_022926656.1|	--	A0A1S3AZW7_CUCME,SubName: Full=ctenidin-3-like {ECO:0000313|RefSeq:XP_008439905.1};
Cla001352	-2.457	0	0	0	--	--	--	ref|XP_022977341.1|	--	A0A0A0KN78_CUCSA,SubName: Full=Uncharacterized protein {ECO:0000313|EMBL:KGN49191.1};
Cla001353	-1.331	0	0	0	--	--	--	gb|KGN49192.1|	--	A0A0A0KLE0_CUCSA,SubName: Full=Uncharacterized protein {ECO:0000313|EMBL:KGN49192.1};
Cla001354	-2.532	0	0	0	--	--	--	gb|EEF40912.1|	--	B9S603_RICCO,SubName: Full=Uncharacterized protein {ECO:0000313|EMBL:EEF40912.1};
Cla001435	0	0	0	-2.883	GO:0016491,oxidoreductase activity	--	At5g37980	ref|XP_008465751.1|	DBR_TOBAC,RecName: Full=2-alkenal reductase (NADP(+)-dependent); EC=1.3.1.102 {ECO:0000269|PubMed:17945329, ECO:0000269|Ref.3, ECO:0000269|Ref.4}; AltName: Full=Alkenal double bound reductase; AltName: Full=Allylic alcohol dehydrogenase 1 {ECO:0000303|PubMed:11117876}; Short=allyl-ADH1 {ECO:0000303|PubMed:11117876}; AltName: Full=Flavin-free double bond reductase {ECO:0000303|Ref.4}; Short=NtDBR;…	A0A1S3CPY3_CUCME,SubName: Full=2-alkenal reductase (NADP(+)-dependent)-like {ECO:0000313|RefSeq:XP_008465751.1};
Cla001439	0	-1.204	0	0	GO:0005618,cell wall; GO:0005829,cytosol; GO:0005576,extracellular region; GO:0009506,plasmodesma; GO:0005773,vacuole; GO:0004869,cysteine-type endopeptidase inhibitor activity; GO:0002020,protease binding; GO:0006952,defense response; GO:2000117,negative regulation of cysteine-type endopeptidase activity	--	At4g16500	gb|KGN44208.1|	CYT4_ARATH,RecName: Full=Cysteine proteinase inhibitor 4; Short=AtCYS-4; Flags: Precursor;	A0A0A0K3W6_CUCSA,RecName: Full=Cysteine proteinase inhibitor {ECO:0000256|RuleBase:RU362130};
Cla001476	1.007	0	0	0	GO:0009317,acetyl-CoA carboxylase complex; GO:0009507,chloroplast; GO:0009941,chloroplast envelope; GO:0009570,chloroplast stroma; GO:0009536,plastid; GO:0003989,acetyl-CoA carboxylase activity; GO:0006633,fatty acid biosynthetic process	K02160: accB, bccP; acetyl-CoA carboxylase biotin carboxyl carrier protein	At5g16390	ref|XP_008451672.1|	BCCP1_ARATH,RecName: Full=Biotin carboxyl carrier protein of acetyl-CoA carboxylase 1, chloroplastic; Short=AtBCCP1; Short=BCCP-1; Flags: Precursor;	A0A1S3BS42_CUCME,RecName: Full=Biotin carboxyl carrier protein of acetyl-CoA carboxylase {ECO:0000256|RuleBase:RU364072};
Cla001482	-1.517	0	0	0	GO:0009507,chloroplast; GO:0009941,chloroplast envelope; GO:0009570,chloroplast stroma; GO:0098807,chloroplast thylakoid membrane protein complex; GO:0071482,cellular response to light stimulus; GO:0007623,circadian rhythm	--	At3g26740	ref|XP_022991991.1|	LIRP1_ARATH,RecName: Full=Light-regulated protein 1, chloroplastic {ECO:0000303|PubMed:8932388}; AltName: Full=Protein CCR-LIKE, chloroplastic {ECO:0000303|PubMed:16055688}; Flags: Precursor;	Q39636_CUCSA,SubName: Full=CR9 protein {ECO:0000313|EMBL:BAA06153.1}; SubName: Full=Putative cytokinin-repressed protein {ECO:0000313|EMBL:CBZ13178.1};
Cla001487	0	0	0	-1.06	GO:0005634,nucleus; GO:0042803,protein homodimerization activity; GO:0003714,transcription corepressor activity; GO:0006952,defense response; GO:1903507,negative regulation of nucleic acid-templated transcription; GO:2000022,regulation of jasmonic acid mediated signaling pathway; GO:0010112,regulation of systemic acquired resistance; GO:0006355,regulation of transcription, DNA-templated; GO:00097…	K13464: JAZ; jasmonate ZIM domain-containing protein	At5g13220	ref|XP_022953183.1|	TIF9_ARATH,RecName: Full=Protein TIFY 9; AltName: Full=Jasmonate ZIM domain-containing protein 10; AltName: Full=Protein JASMONATE-ASSOCIATED 1; AltName: Full=Protein JAZ10;	A0A0A0K9H7_CUCSA,SubName: Full=Uncharacterized protein {ECO:0000313|EMBL:KGN46420.1};
Cla001503	1.096	0	0	0	GO:0009506,plasmodesma	--	At1g69040	ref|XP_004140541.1|	ACR4_ARATH,RecName: Full=ACT domain-containing protein ACR4 {ECO:0000305}; AltName: Full=Protein ACT DOMAIN REPEATS 4 {ECO:0000303|PubMed:12481063};	A0A0A0KC82_CUCSA,SubName: Full=Uncharacterized protein {ECO:0000313|EMBL:KGN46439.1};
Cla001510	-3.053	0	0	0	--	--	At1g27990	ref|XP_023550142.1|	--	A0A0A0KAF1_CUCSA,SubName: Full=Uncharacterized protein {ECO:0000313|EMBL:KGN46448.1};
Cla001513	-1.568	0	0	0	GO:0016021,integral component of membrane; GO:0005634,nucleus; GO:0005886,plasma membrane; GO:0009959,negative gravitropism; GO:0009958,positive gravitropism; GO:0040008,regulation of growth	--	At5g14090	ref|XP_008459858.1|	LAZY1_ARATH,RecName: Full=Protein LAZY 1 {ECO:0000305}; Short=AtLA1 {ECO:0000303|PubMed:25028496}; Short=AtLAZY1 {ECO:0000303|PubMed:23331961};	A0A1S3CCD5_CUCME,SubName: Full=uncharacterized protein LOC103498856 isoform X1 {ECO:0000313|RefSeq:XP_008459858.1};
Cla001659	2.29	0	0	0	--	--	--	--	--	--
Cla001679	-3.114	0	0	0	GO:0102965,alcohol-forming fatty acyl-CoA reductase activity; GO:0080019,fatty-acyl-CoA reductase (alcohol-forming) activity; GO:0006629,lipid metabolic process	K13356: FAR; alcohol-forming fatty acyl-CoA reductase [EC:1.2.1.84]	At3g44550	gb|KGN64884.1|	FAR_SIMCH,RecName: Full=Alcohol-forming fatty acyl-CoA reductase; EC=1.2.1.84;	A0A0A0LV92_CUCSA,RecName: Full=Fatty acyl-CoA reductase {ECO:0000256|RuleBase:RU363097}; EC=1.2.1.84 {ECO:0000256|RuleBase:RU363097};
Cla001732	1.194	0	0	0	GO:0048046,apoplast; GO:0005618,cell wall; GO:0004553,hydrolase activity, hydrolyzing O-glycosyl compounds; GO:0016762,xyloglucan:xyloglucosyl transferase activity; GO:0042546,cell wall biogenesis; GO:0071555,cell wall organization; GO:0010411,xyloglucan metabolic process	K08235: E2.4.1.207; xyloglucan:xyloglucosyl transferase [EC:2.4.1.207]	At4g03210	ref|XP_022140268.1|	XTH9_ARATH,RecName: Full=Xyloglucan endotransglucosylase/hydrolase protein 9; Short=At-XTH9; Short=XTH-9; EC=2.4.1.207; Flags: Precursor;	A0A2I4ERC1_9ROSI,SubName: Full=xyloglucan endotransglucosylase/hydrolase protein 9-like isoform X1 {ECO:0000313|RefSeq:XP_018821945.1}; SubName: Full=xyloglucan endotransglucosylase/hydrolase protein 9-like isoform X2 {ECO:0000313|RefSeq:XP_018821946.1};
Cla001741	0	3.939	0	0	GO:0005509,calcium ion binding; GO:0009733,response to auxin	K10840: CETN2; centrin-2	At4g27280	ref|XP_004140055.1|	PBP1_ARATH,RecName: Full=Calcium-binding protein PBP1; AltName: Full=KIC-related protein 2; AltName: Full=PINOID-binding protein 1;	A0A0A0KCV2_CUCSA,SubName: Full=Uncharacterized protein {ECO:0000313|EMBL:KGN46674.1};
Cla001748	-1.098	0	0	0	GO:0016021,integral component of membrane; GO:0005770,late endosome; GO:0015299,solute:proton antiporter activity; GO:0015672,monovalent inorganic cation transport; GO:0006813,potassium ion transport; GO:0006885,regulation of pH	--	At5g41610	ref|XP_004146577.1|	CHX18_ARATH,RecName: Full=Cation/H(+) antiporter 18; AltName: Full=Protein CATION/H+ EXCHANGER 18; Short=AtCHX18;	A0A0A0KYA1_CUCSA,SubName: Full=Uncharacterized protein {ECO:0000313|EMBL:KGN53372.1};
Cla001812	-1.754	0	0	0	GO:0005634,nucleus; GO:0003677,DNA binding; GO:0003700,DNA binding transcription factor activity; GO:0046872,metal ion binding; GO:0044212,transcription regulatory region DNA binding; GO:0042545,cell wall modification; GO:0045787,positive regulation of cell cycle; GO:0045893,positive regulation of transcription, DNA-templated; GO:0009733,response to auxin; GO:0009751,response to salicylic acid; G…	--	At3g50410	ref|XP_004141936.1|	DOF34_ARATH,RecName: Full=Dof zinc finger protein DOF3.4; Short=AtDOF3.4; AltName: Full=OBF-binding protein 1;	A0A0A0KG50_CUCSA,SubName: Full=Uncharacterized protein {ECO:0000313|EMBL:KGN48488.1};
Cla001847	0	0	0	-1.778	GO:0005576,extracellular region; GO:0020037,heme binding; GO:0046872,metal ion binding; GO:0004601,peroxidase activity; GO:0042744,hydrogen peroxide catabolic process; GO:0006979,response to oxidative stress	K00430: E1.11.1.7; peroxidase [EC:1.11.1.7]	At5g64120	ref|XP_011659714.1|	PER2_ARAHY,RecName: Full=Cationic peroxidase 2; EC=1.11.1.7; AltName: Full=PNPC2; Flags: Precursor;	A0A0A0K201_CUCSA,RecName: Full=Peroxidase {ECO:0000256|RuleBase:RU362060, ECO:0000256|SAAS:SAAS00709852}; EC=1.11.1.7 {ECO:0000256|RuleBase:RU362060, ECO:0000256|SAAS:SAAS00709852};
Cla001867	-1.517	0	0	0	--	--	At5g60680	ref|XP_008462513.1|	--	A0A1S3CH53_CUCME,SubName: Full=uncharacterized protein LOC103500846 {ECO:0000313|RefSeq:XP_008462513.1};
Cla001961	-1.03	0	0	0	GO:0005634,nucleus; GO:0003677,DNA binding; GO:0003700,DNA binding transcription factor activity; GO:0006351,transcription, DNA-templated	--	At1g76880	ref|XP_008445762.1|	TGT2_ARATH,RecName: Full=Trihelix transcription factor GT-2; AltName: Full=Trihelix DNA-binding protein GT-2;	A0A1S3BE60_CUCME,SubName: Full=trihelix transcription factor GT-2-like {ECO:0000313|RefSeq:XP_008445762.1};
Cla001988	0	0	-2.278	-2.323	GO:0005618,cell wall; GO:0005576,extracellular region; GO:0004650,polygalacturonase activity; GO:0005975,carbohydrate metabolic process; GO:0071555,cell wall organization; GO:0009835,fruit ripening	K01184: E3.2.1.15; polygalacturonase [EC:3.2.1.15]	At2g43870	gb|KGN44052.1|	PGLR_PRUPE,RecName: Full=Polygalacturonase; Short=PG; EC=3.2.1.15; AltName: Full=Pectinase; Flags: Precursor;	A0A0A0K6Z5_CUCSA,SubName: Full=Uncharacterized protein {ECO:0000313|EMBL:KGN44052.1};
Cla002010	-1.351	0	0	0	GO:0030246,carbohydrate binding	--	At4g19840	gb|AAA92465.1|	LEC_LUFAC,RecName: Full=Lectin {ECO:0000303|PubMed:26597132}; AltName: Full=Agglutinin {ECO:0000303|PubMed:26597132}; Short=LAA {ECO:0000303|PubMed:26597132};	Q39461_9ROSI,SubName: Full=Phloem protein 2 {ECO:0000313|EMBL:AAA92465.1};
Cla002040	-1.935	0	0	0	--	--	At2g46300	ref|XP_008445748.1|	--	A0A1S3BDG3_CUCME,SubName: Full=uncharacterized protein LOC103488682 {ECO:0000313|RefSeq:XP_008445748.1};
Cla002161	1.178	1.585	2.764	0	GO:0005737,cytoplasm; GO:0009055,electron transfer activity; GO:0015035,protein disulfide oxidoreductase activity; GO:0045454,cell redox homeostasis	--	At5g14070	ref|XP_008450140.1|	GRXC1_ORYSJ,RecName: Full=Glutaredoxin-C1;	A0A1S3BP86_CUCME,SubName: Full=glutaredoxin-C1-like {ECO:0000313|RefSeq:XP_008450140.1};
Cla002166	0	0	0	-1.384	GO:0009507,chloroplast; GO:0009536,plastid; GO:0008889,glycerophosphodiester phosphodiesterase activity; GO:0000287,magnesium ion binding; GO:0030643,cellular phosphate ion homeostasis; GO:0006071,glycerol metabolic process; GO:0046475,glycerophospholipid catabolic process	K18696: GDE1; glycerophosphodiester phosphodiesterase [EC:3.1.4.46]	At3g02040	ref|XP_008450149.1|	GDPD1_ARATH,RecName: Full=Glycerophosphodiester phosphodiesterase GDPD1, chloroplastic {ECO:0000305}; EC=3.1.4.46 {ECO:0000269|PubMed:21323773}; AltName: Full=Glycerophosphodiester phosphodiesterase 1 {ECO:0000303|PubMed:21323773}; Short=AtGDPD1 {ECO:0000303|PubMed:21323773}; AltName: Full=Protein SENESCENCE-RELATED GENE 3 {ECO:0000303|PubMed:8883383}; Flags: Precursor;	A0A1S3BN04_CUCME,SubName: Full=glycerophosphodiester phosphodiesterase GDPD1, chloroplastic-like {ECO:0000313|RefSeq:XP_008450149.1};
Cla002264	3.021	0	0	0	GO:0090575,RNA polymerase II transcription factor complex; GO:0003700,DNA binding transcription factor activity; GO:0046983,protein dimerization activity; GO:0000977,RNA polymerase II regulatory region sequence-specific DNA binding; GO:0050832,defense response to fungus; GO:0006357,regulation of transcription by RNA polymerase II; GO:0006355,regulation of transcription, DNA-templated; GO:0006351,…	--	At4g20970	ref|XP_008455310.1|	BH162_ARATH,RecName: Full=Transcription factor bHLH162; AltName: Full=Basic helix-loop-helix protein 162; Short=AtbHLH162 {ECO:0000303|PubMed:14600211}; Short=bHLH 162; AltName: Full=bHLH transcription factor bHLH162;	A0A1S3C1C4_CUCME,SubName: Full=transcription factor bHLH55-like {ECO:0000313|RefSeq:XP_008455310.1};
Cla002265	-1.396	0	0	0	--	--	At4g32480	ref|XP_008455311.1|	--	A0A1S3C1V2_CUCME,SubName: Full=uncharacterized protein LOC103495506 {ECO:0000313|RefSeq:XP_008455311.1};
Cla002277	-1.03	0	0	0	GO:0005789,endoplasmic reticulum membrane; GO:0016021,integral component of membrane; GO:0046872,metal ion binding; GO:0004842,ubiquitin-protein transferase activity; GO:0043161,proteasome-mediated ubiquitin-dependent protein catabolic process; GO:0016567,protein ubiquitination; GO:0009409,response to cold; GO:0009723,response to ethylene; GO:0006970,response to osmotic stress; GO:0009414,respons…	K10666: RNF5; E3 ubiquitin-protein ligase RNF5 [EC:2.3.2.27]	At4g03510	ref|XP_011658745.1|	RMA1_CAPAN,RecName: Full=E3 ubiquitin-protein ligase RMA1H1; EC=2.3.2.27; AltName: Full=Protein RING membrane-anchor 1 homolog 1; AltName: Full=RING-type E3 ubiquitin transferase RMA1H1 {ECO:0000305};	A0A1S3C1W7_CUCME,SubName: Full=E3 ubiquitin-protein ligase RMA1H1 {ECO:0000313|RefSeq:XP_008455327.1, ECO:0000313|RefSeq:XP_008455328.1, ECO:0000313|RefSeq:XP_008455329.1};
Cla002345	-2.358	0	0	-1.88	GO:0016021,integral component of membrane; GO:0022857,transmembrane transporter activity; GO:0008643,carbohydrate transport; GO:0055062,phosphate ion homeostasis	K13783: SLC37A1_2; MFS transporter, OPA family, solute carrier family 37 (glycerol-3-phosphate transporter), member 1/2	At3g47420	ref|XP_008467235.1|	GLPT1_ARATH,RecName: Full=Putative glycerol-3-phosphate transporter 1; Short=G-3-P transporter 1; AltName: Full=Glycerol-3-phosphate permease 1; Short=AtG3Pp1; Short=G-3-P permease 1; AltName: Full=Protein PHOSPHATE STARVATION-INDUCED GENE 3; Short=AtPS3;	A0A1S3CT24_CUCME,SubName: Full=putative glycerol-3-phosphate transporter 1 {ECO:0000313|RefSeq:XP_008467235.1};
Cla002419	-2.363	0	1.243	0	--	--	--	ref|XP_022923069.1|	--	--
Cla002452	-1.215	0	0	0	--	--	--	ref|XP_008464353.1|	--	A0A1S3CMT6_CUCME,SubName: Full=uncharacterized protein LOC103502262 {ECO:0000313|RefSeq:XP_008464353.1};
Cla002480	-1.543	0	0	0	GO:0005783,endoplasmic reticulum; GO:0010168,ER body; GO:0005622,intracellular; GO:0005773,vacuole; GO:0004521,endoribonuclease activity; GO:0033897,ribonuclease T2 activity; GO:0003723,RNA binding; GO:0010507,negative regulation of autophagy; GO:0016075,rRNA catabolic process	--	At2g39780	ref|XP_008462864.1|	RNS2_ARATH,RecName: Full=Ribonuclease 2; EC=3.1.27.1; Flags: Precursor;	A0A1S3CJH0_CUCME,SubName: Full=ribonuclease 2-like isoform X3 {ECO:0000313|RefSeq:XP_008462864.1};
Cla002485	-1.353	0	0	0	GO:0048046,apoplast; GO:0005618,cell wall; GO:0005829,cytosol; GO:0005615,extracellular space; GO:0005794,Golgi apparatus; GO:0009505,plant-type cell wall; GO:0009506,plasmodesma	--	At5g64260	ref|XP_023552243.1|	EXOL2_ARATH,RecName: Full=Protein EXORDIUM-like 2; Flags: Precursor;	A0A0A0KVW8_CUCSA,SubName: Full=Uncharacterized protein {ECO:0000313|EMBL:KGN53718.1};
Cla002558	1.217	0	0	0	GO:0005794,Golgi apparatus; GO:0000139,Golgi membrane; GO:0016021,integral component of membrane; GO:0015297,antiporter activity; GO:0022857,transmembrane transporter activity; GO:0008643,carbohydrate transport; GO:0048354,mucilage biosynthetic process involved in seed coat development; GO:0090480,purine nucleotide-sugar transmembrane transport	K15285: SLC35E3; solute carrier family 35, member E3	At1g21070	ref|XP_008448146.1|	URGT2_ARATH,RecName: Full=UDP-rhamnose/UDP-galactose transporter 2 {ECO:0000312|EMBL:AKA88220.1}; Short=UDP-Rha/UDP-Gal transporter 2 {ECO:0000303|PubMed:25053812};	A0A1S3BJ05_CUCME,SubName: Full=UDP-galactose transporter 2-like {ECO:0000313|RefSeq:XP_008448146.1};
Cla002570	4.1	0	0	0	GO:0071944,cell periphery; GO:0005618,cell wall; GO:0005576,extracellular region; GO:0045330,aspartyl esterase activity; GO:0030599,pectinesterase activity; GO:0046910,pectinesterase inhibitor activity; GO:0042545,cell wall modification; GO:0045490,pectin catabolic process	--	At1g11370	ref|XP_023511444.1|	PME56_ARATH,RecName: Full=Probable pectinesterase 56; Short=PE 56; EC=3.1.1.11; AltName: Full=Pectin methylesterase 56; Short=AtPME56; Flags: Precursor;	A0A0A0KQN0_CUCSA,SubName: Full=Uncharacterized protein {ECO:0000313|EMBL:KGN51199.1};
Cla002572	-1.144	0	0	0	GO:0005737,cytoplasm; GO:0005634,nucleus; GO:0019005,SCF ubiquitin ligase complex; GO:0005516,calmodulin binding; GO:0004402,histone acetyltransferase activity; GO:0003712,transcription cofactor activity; GO:0031625,ubiquitin protein ligase binding; GO:0008270,zinc ion binding; GO:0009553,embryo sac development; GO:0009555,pollen development; GO:0043161,proteasome-mediated ubiquitin-dependent pro…	--	At5g63160	ref|XP_004152501.1|	BT1_ARATH,RecName: Full=BTB/POZ and TAZ domain-containing protein 1; AltName: Full=BTB and TAZ domain protein 1;	A0A0A0LWH0_CUCSA,SubName: Full=Protein binding protein {ECO:0000313|EMBL:KGN64356.1};
Cla002600	-1.932	0	0	0	--	--	At5g50360	ref|XP_004152517.1|	--	A0A0A0LRH0_CUCSA,SubName: Full=Uncharacterized protein {ECO:0000313|EMBL:KGN64388.1};
Cla002628	-2.366	0	-1.452	-1.463	GO:0005634,nucleus; GO:0003677,DNA binding; GO:0003700,DNA binding transcription factor activity; GO:0046983,protein dimerization activity; GO:0000977,RNA polymerase II regulatory region sequence-specific DNA binding; GO:0030154,cell differentiation; GO:0009553,embryo sac development; GO:0010582,floral meristem determinacy; GO:0048437,floral organ development; GO:0048449,floral organ formation; G…	K09264: K09264; MADS-box transcription factor, plant	At2g42830	ref|XP_023519986.1|	MADS6_ORYSJ,RecName: Full=MADS-box transcription factor 6; AltName: Full=OsMADS6; AltName: Full=Protein MOSAIC FLORAL ORGANS 1;	Q9AYR8_CUCSA,SubName: Full=Putative MADS-box protein {ECO:0000313|EMBL:BAB21509.1};
Cla002632	0	0	0	-1.864	GO:0005737,cytoplasm; GO:0005886,plasma membrane; GO:0046914,transition metal ion binding; GO:0046916,cellular transition metal ion homeostasis; GO:0030001,metal ion transport	--	At5g63530	gb|KGN64424.1|	HIP7_ARATH,RecName: Full=Heavy metal-associated isoprenylated plant protein 7 {ECO:0000303|PubMed:21072340, ECO:0000303|PubMed:23368984}; Short=AtHIP07 {ECO:0000303|PubMed:21072340, ECO:0000303|PubMed:23368984}; AltName: Full=Farnesylated protein 3 {ECO:0000303|PubMed:8837031}; Short=AtFP3 {ECO:0000303|PubMed:8837031}; Flags: Precursor;	A0A0A0LTW7_CUCSA,SubName: Full=Uncharacterized protein {ECO:0000313|EMBL:KGN64424.1};
Cla002640	-2.508	0	0	0	GO:0016021,integral component of membrane; GO:0005887,integral component of plasma membrane; GO:0005886,plasma membrane; GO:0008515,sucrose transmembrane transporter activity; GO:0051119,sugar transmembrane transporter activity; GO:0009793,embryo development ending in seed dormancy; GO:0051260,protein homooligomerization; GO:0010431,seed maturation; GO:0015770,sucrose transport	K15382: SLC50A, SWEET; solute carrier family 50 (sugar transporter)	At5g23660	ref|XP_016898888.1|	SWT12_ARATH,RecName: Full=Bidirectional sugar transporter SWEET12 {ECO:0000303|PubMed:21107422}; Short=AtSWEET12 {ECO:0000303|PubMed:21107422}; AltName: Full=MtN3-like protein {ECO:0000303|Ref.1}; AltName: Full=Protein SUGARS WILL EVENTUALLY BE EXPORTED TRANSPORTERS 12 {ECO:0000303|PubMed:21107422};	A0A1S4DSE4_CUCME,RecName: Full=Bidirectional sugar transporter SWEET {ECO:0000256|RuleBase:RU910715};
Cla002659	-1.036	0	0	0	GO:0016758,transferase activity, transferring hexosyl groups; GO:0008152,metabolic process	K08237: E2.4.1.218; hydroquinone glucosyltransferase [EC:2.4.1.218]	At1g07250	ref|XP_023519630.1|	UGT43_PUEML,RecName: Full=UDP-glycosyltransferase 43 {ECO:0000303|PubMed:27066037}; Short=PlUGT43 {ECO:0000303|PubMed:27066037}; EC=2.4.1.- {ECO:0000269|PubMed:28207970}; AltName: Full=UDP-glucose:daidzein C-glucosyltransferase {ECO:0000305};	A0A0A0LRR6_CUCSA,RecName: Full=Glycosyltransferase {ECO:0000256|RuleBase:RU362057}; EC=2.4.1.- {ECO:0000256|RuleBase:RU362057};
Cla002685	0	0	0	-1.172	GO:0016491,oxidoreductase activity	K21568: PLR; pinoresinol/lariciresinol reductase [EC:1.23.1.1 1.23.1.2 1.23.1.3 1.23.1.4]	At1g32100	ref|XP_022967298.1|	IFRH_LUPAL,RecName: Full=Isoflavone reductase homolog; EC=1.3.1.-;	A0A1S3CCG8_CUCME,SubName: Full=isoflavone reductase homolog {ECO:0000313|RefSeq:XP_008460437.1};
Cla002701	-1.754	0	0	0	--	--	--	ref|XP_004144458.2|	--	A0A0A0L8T7_CUCSA,SubName: Full=Uncharacterized protein {ECO:0000313|EMBL:KGN58375.1};
Cla002703	-1.058	0	0	0	--	--	At3g25130	ref|XP_004144391.1|	--	A0A1S4E2S0_CUCME,SubName: Full=uncharacterized protein LOC103499217 {ECO:0000313|RefSeq:XP_016902526.1};
Cla002718	-1.112	0	0	0	GO:0005886,plasma membrane; GO:0016567,protein ubiquitination	--	At5g48800	ref|XP_004144382.2|	Y5880_ARATH,RecName: Full=BTB/POZ domain-containing protein At5g48800;	A0A0A0LE41_CUCSA,SubName: Full=Uncharacterized protein {ECO:0000313|EMBL:KGN58361.1};
Cla002744	2.052	0	0	0	--	--	--	ref|XP_008447334.1|	--	A0A1S3BI24_CUCME,SubName: Full=acanthoscurrin-2-like {ECO:0000313|RefSeq:XP_008447334.1};
Cla002749	0	0	0	-1.4	GO:0005634,nucleus; GO:0003677,DNA binding; GO:0003700,DNA binding transcription factor activity; GO:0042802,identical protein binding; GO:0010313,phytochrome binding; GO:0046983,protein dimerization activity; GO:0015995,chlorophyll biosynthetic process; GO:0009740,gibberellic acid mediated signaling pathway; GO:0006783,heme biosynthetic process; GO:0009959,negative gravitropism; GO:0010100,negat…	K16189: PIF4; phytochrome-interacting factor 4	At2g20180	ref|XP_011651631.1|	PIF1_ARATH,RecName: Full=Transcription factor PIF1; AltName: Full=Basic helix-loop-helix protein 15; Short=AtbHLH15; Short=bHLH 15; AltName: Full=Protein PHY-INTERACTING FACTOR 1; AltName: Full=Protein PHYTOCHROME INTERACTING FACTOR 3-LIKE 5; AltName: Full=Transcription factor EN 101; AltName: Full=bHLH transcription factor bHLH015;	A0A0A0LE09_CUCSA,SubName: Full=Uncharacterized protein {ECO:0000313|EMBL:KGN58326.1};
Cla002824	0	0	0	-2.444	GO:0009507,chloroplast; GO:0047714,galactolipase activity; GO:0008970,phosphatidylcholine 1-acylhydrolase activity; GO:0004806,triglyceride lipase activity; GO:0016042,lipid catabolic process	--	At4g16820	ref|XP_004148351.1|	PLA14_ARATH,RecName: Full=Phospholipase A1-Ibeta2, chloroplastic; EC=3.1.1.-; Flags: Precursor;	A0A0A0LEL7_CUCSA,SubName: Full=Uncharacterized protein {ECO:0000313|EMBL:KGN60475.1};
Cla002832	-4.554	0	0	0	--	--	--	ref|XP_011652891.1|	--	A0A1S3CPX7_CUCME,SubName: Full=low-temperature-induced 65 kDa protein {ECO:0000313|RefSeq:XP_008465872.2};
Cla002876	0	0	0	-2.416	GO:0009507,chloroplast; GO:0005634,nucleus; GO:0071482,cellular response to light stimulus; GO:0009816,defense response to bacterium, incompatible interaction; GO:0051091,positive regulation of DNA binding transcription factor activity	--	At3g56710	ref|XP_008443611.1|	SIB1_ARATH,RecName: Full=Sigma factor binding protein 1, chloroplastic; Short=AtsibI; Short=Sigma factor binding protein I; AltName: Full=SigA binding protein; AltName: Full=VQ motif-containing protein 23 {ECO:0000303|PubMed:22535423}; Short=AtVQ23 {ECO:0000303|PubMed:22535423}; Flags: Precursor;	A0A1S3B8H6_CUCME,SubName: Full=uncharacterized protein LOC103487167 {ECO:0000313|RefSeq:XP_008443611.1};
Cla002877	-1.881	0	0	0	GO:0016021,integral component of membrane; GO:0005774,vacuolar membrane; GO:0015171,amino acid transmembrane transporter activity; GO:0003333,amino acid transmembrane transport	K15015: SLC32A, VGAT; solute carrier family 32 (vesicular inhibitory amino acid transporter)	At2g39130	ref|XP_022983750.1|	AVT1A_ARATH,RecName: Full=Amino acid transporter AVT1A {ECO:0000305}; Short=AtAvt1A {ECO:0000303|PubMed:27925655};	A0A0A0LEV6_CUCSA,SubName: Full=Uncharacterized protein {ECO:0000313|EMBL:KGN59444.1};
Cla002895	1.167	0	0	0	GO:0005886,plasma membrane; GO:0009055,electron transfer activity; GO:0015035,protein disulfide oxidoreductase activity; GO:0045454,cell redox homeostasis	K17479: GRXCR1; glutaredoxin domain-containing cysteine-rich protein 1	At3g57070	ref|XP_004136649.1|	Y5986_ARATH,RecName: Full=Uncharacterized protein At5g39865;	A0A0A0LFK6_CUCSA,SubName: Full=Uncharacterized protein {ECO:0000313|EMBL:KGN59467.1};
Cla002904	2.135	0	0	0	--	--	--	gb|KGN59476.1|	--	A0A0A0LHI4_CUCSA,SubName: Full=Uncharacterized protein {ECO:0000313|EMBL:KGN59476.1};
Cla002909	-2.541	0	0	0	GO:0005576,extracellular region; GO:0008422,beta-glucosidase activity; GO:0102483,scopolin beta-glucosidase activity; GO:0005975,carbohydrate metabolic process	K01188: E3.2.1.21; beta-glucosidase [EC:3.2.1.21]	At2g44450	ref|XP_008443298.1|	BGL12_ORYSI,RecName: Full=Beta-glucosidase 12 {ECO:0000305}; EC=3.2.1.21 {ECO:0000305}; Flags: Precursor;	A0A1S3B7N5_CUCME,SubName: Full=beta-glucosidase 24-like {ECO:0000313|RefSeq:XP_008443298.1};
Cla002923	-1.212	0	0	-1.424	GO:0005737,cytoplasm; GO:0005634,nucleus; GO:0003700,DNA binding transcription factor activity; GO:0043565,sequence-specific DNA binding; GO:0046686,response to cadmium ion; GO:0006351,transcription, DNA-templated	K09419: HSFF; heat shock transcription factor, other eukaryote	At2g41690	ref|XP_008443318.1|	HSFB3_ARATH,RecName: Full=Heat stress transcription factor B-3; Short=AtHsfB3; AltName: Full=AtHsf-05;	A0A1S3B7P7_CUCME,SubName: Full=heat stress transcription factor B-3-like {ECO:0000313|RefSeq:XP_008443318.1};
Cla002940	-1.19	0	0	0	GO:0046872,metal ion binding; GO:0030570,pectate lyase activity; GO:0045490,pectin catabolic process	K01728: pel; pectate lyase [EC:4.2.2.2]	At1g04680	ref|XP_008460726.1|	PLY15_ARATH,RecName: Full=Probable pectate lyase 15; EC=4.2.2.2; AltName: Full=Pectate lyase A11; Flags: Precursor;	A0A1S3CDJ9_CUCME,RecName: Full=Pectate lyase {ECO:0000256|RuleBase:RU361123}; EC=4.2.2.2 {ECO:0000256|RuleBase:RU361123};
Cla002942	-2.769	0	0	0	GO:0009570,chloroplast stroma; GO:0009535,chloroplast thylakoid membrane; GO:0045549,9-cis-epoxycarotenoid dioxygenase activity; GO:0046872,metal ion binding; GO:0009688,abscisic acid biosynthetic process; GO:0010114,response to red light; GO:0009639,response to red or far red light	K09840: NCED; 9-cis-epoxycarotenoid dioxygenase [EC:1.13.11.51]	At3g24220	ref|XP_008460725.1|	NCED6_ARATH,RecName: Full=9-cis-epoxycarotenoid dioxygenase NCED6, chloroplastic; Short=AtNCED6; EC=1.13.11.51; Flags: Precursor;	A0A1S3CD31_CUCME,SubName: Full=9-cis-epoxycarotenoid dioxygenase NCED6, chloroplastic {ECO:0000313|RefSeq:XP_008460725.1};
Cla003099	0	0	0	-4.998	--	--	--	--	--	--
Cla003168	-1.158	0	0	0	GO:0005829,cytosol; GO:2000762,regulation of phenylpropanoid metabolic process	--	At2g44130	ref|XP_008449809.1|	FBK46_ARATH,RecName: Full=F-box/kelch-repeat protein At2g44130;	A0A1S3BMV8_CUCME,SubName: Full=F-box/kelch-repeat protein At2g44130-like {ECO:0000313|RefSeq:XP_008449809.1};
Cla003169	-1.346	0	0	0	GO:0009507,chloroplast; GO:0004310,farnesyl-diphosphate farnesyltransferase activity; GO:0016767,geranylgeranyl-diphosphate geranylgeranyltransferase activity; GO:0051996,squalene synthase activity; GO:0016117,carotenoid biosynthetic process; GO:0006696,ergosterol biosynthetic process	K02291: crtB; 15-cis-phytoene synthase [EC:2.5.1.32]	At5g17230	ref|XP_022153760.1|	PSY1_SOLLC,RecName: Full=Phytoene synthase 1, chloroplastic; EC=2.5.1.32; AltName: Full=Fruit-ripening-specific protein pTOM5; Flags: Precursor;	A0A1L5JHW5_LUFAE,SubName: Full=Phytoene synthase 2 {ECO:0000313|EMBL:APO14284.1};
Cla003174	0	0	0	-3.288	GO:0031225,anchored component of membrane; GO:0005886,plasma membrane; GO:0008289,lipid binding; GO:0006869,lipid transport	--	At2g44300	ref|XP_008449799.1|	YLS3_ARATH,RecName: Full=Protein YLS3; AltName: Full=Protein YELLOW-LEAF-SPECIFIC GENE 3; AltName: Full=Xylogen-like protein 9; Short=AtXYLP9; Flags: Precursor;	A0A1S3BMU8_CUCME,SubName: Full=protein YLS3 {ECO:0000313|RefSeq:XP_008449799.1};
Cla003190	-1.387	0	0	0	GO:0020037,heme binding; GO:0046872,metal ion binding; GO:0004601,peroxidase activity; GO:0042744,hydrogen peroxide catabolic process; GO:0006979,response to oxidative stress	K00430: E1.11.1.7; peroxidase [EC:1.11.1.7]	At5g06720	ref|XP_008449774.1|	PER2_CUCSA,RecName: Full=Peroxidase 2; EC=1.11.1.7; AltName: Full=CUP2; Flags: Fragment;	A0A1S3BMS9_CUCME,RecName: Full=Peroxidase {ECO:0000256|RuleBase:RU362060, ECO:0000256|SAAS:SAAS00709852}; EC=1.11.1.7 {ECO:0000256|RuleBase:RU362060, ECO:0000256|SAAS:SAAS00709852};
Cla003191	0	3.436	0	0	GO:0020037,heme binding; GO:0046872,metal ion binding; GO:0004601,peroxidase activity; GO:0042744,hydrogen peroxide catabolic process; GO:0006979,response to oxidative stress	--	At5g06720	ref|XP_022986126.1|	PER2_CUCSA,RecName: Full=Peroxidase 2; EC=1.11.1.7; AltName: Full=CUP2; Flags: Fragment;	A0A1S3BMS9_CUCME,RecName: Full=Peroxidase {ECO:0000256|RuleBase:RU362060, ECO:0000256|SAAS:SAAS00709852}; EC=1.11.1.7 {ECO:0000256|RuleBase:RU362060, ECO:0000256|SAAS:SAAS00709852};
Cla003194	-1.338	0	0	0	GO:0020037,heme binding; GO:0046872,metal ion binding; GO:0004601,peroxidase activity; GO:0042744,hydrogen peroxide catabolic process; GO:0006979,response to oxidative stress	K00430: E1.11.1.7; peroxidase [EC:1.11.1.7]	At5g06720	ref|XP_008449771.2|	PER2_CUCSA,RecName: Full=Peroxidase 2; EC=1.11.1.7; AltName: Full=CUP2; Flags: Fragment;	A0A1S3BNR5_CUCME,RecName: Full=Peroxidase {ECO:0000256|RuleBase:RU362060, ECO:0000256|SAAS:SAAS00709852}; EC=1.11.1.7 {ECO:0000256|RuleBase:RU362060, ECO:0000256|SAAS:SAAS00709852};
Cla003196	0	0	-1.83	-2.238	GO:0005576,extracellular region; GO:0020037,heme binding; GO:0046872,metal ion binding; GO:0004601,peroxidase activity; GO:0042744,hydrogen peroxide catabolic process; GO:0006979,response to oxidative stress	K00430: E1.11.1.7; peroxidase [EC:1.11.1.7]	At5g19890	ref|XP_022153753.1|	PERN_ARMRU,RecName: Full=Peroxidase N; EC=1.11.1.7; AltName: Full=Neutral peroxidase; Flags: Precursor;	A0A1S3BMS4_CUCME,RecName: Full=Peroxidase {ECO:0000256|RuleBase:RU362060, ECO:0000256|SAAS:SAAS00709852}; EC=1.11.1.7 {ECO:0000256|RuleBase:RU362060, ECO:0000256|SAAS:SAAS00709852};
Cla003230	0	0	-1.584	-1.551	GO:0016491,oxidoreductase activity	K09841: ABA2; xanthoxin dehydrogenase [EC:1.1.1.288]	At3g26760	ref|XP_008450017.1|	SDR2A_ARATH,RecName: Full=Short-chain dehydrogenase reductase 2a; Short=AtSDR2a; EC=1.1.1.-;	A0A1S3BPB3_CUCME,SubName: Full=momilactone A synthase-like {ECO:0000313|RefSeq:XP_008450017.1};
Cla003258	-2.117	0	0	0	--	--	--	gb|KGN51192.1|	--	A0A0A0KRZ8_CUCSA,RecName: Full=Cysteine proteinase inhibitor {ECO:0000256|RuleBase:RU362130};
Cla003275	0	0	0	-1.083	GO:0016021,integral component of membrane; GO:0005886,plasma membrane; GO:0005774,vacuolar membrane; GO:0015386,potassium:proton antiporter activity; GO:0015081,sodium ion transmembrane transporter activity; GO:0015385,sodium:proton antiporter activity; GO:0055075,potassium ion homeostasis; GO:0071805,potassium ion transmembrane transport; GO:0051453,regulation of intracellular pH; GO:0009651,res…	--	At5g55470	ref|XP_008447694.1|	NHX4_ARATH,RecName: Full=Sodium/hydrogen exchanger 4; AltName: Full=Na(+)/H(+) exchanger 4; Short=NHE-4;	A0A1S3BIX2_CUCME,RecName: Full=Sodium/hydrogen exchanger {ECO:0000256|RuleBase:RU003722};
Cla003299	0	0	0	-1.285	GO:0016021,integral component of membrane; GO:0016020,membrane; GO:0005886,plasma membrane; GO:0005385,zinc ion transmembrane transporter activity; GO:0071577,zinc ion transmembrane transport	--	At1g55910	ref|XP_004150296.1|	ZIP11_ARATH,RecName: Full=Zinc transporter 11; AltName: Full=ZRT/IRT-like protein 11; Flags: Precursor;	A0A0A0K8F9_CUCSA,SubName: Full=Uncharacterized protein {ECO:0000313|EMBL:KGN44071.1};
Cla003317	0	0	0	1.124	--	--	--	ref|XP_016902960.1|	--	A0A1S4E4R0_CUCME,SubName: Full=uncharacterized protein LOC103501255 isoform X1 {ECO:0000313|RefSeq:XP_016902960.1};
Cla003429	0	0	0	-1.227	--	--	At5g60700	ref|XP_022970291.1|	--	A0A0A0LV36_CUCSA,SubName: Full=Uncharacterized protein {ECO:0000313|EMBL:KGN64839.1};
Cla003508	0	0	1.006	0	GO:0005737,cytoplasm; GO:0005768,endosome; GO:0005794,Golgi apparatus; GO:0016021,integral component of membrane; GO:0019005,SCF ubiquitin ligase complex; GO:0005802,trans-Golgi network; GO:0031625,ubiquitin protein ligase binding; GO:0009061,anaerobic respiration; GO:0043161,proteasome-mediated ubiquitin-dependent protein catabolic process; GO:0042787,NA; GO:0030162,regulation of proteolysis	--	At1g51540_2	ref|XP_022133686.1|	Y3272_ARATH,RecName: Full=Kelch repeat-containing protein At3g27220;	A0A1S3B8V7_CUCME,SubName: Full=kelch repeat-containing protein At3g27220-like {ECO:0000313|RefSeq:XP_008443768.1};
Cla003589	4.583	0	0	0	--	K01179: E3.2.1.4; endoglucanase [EC:3.2.1.4]	At1g13130	ref|XP_008467306.1|	--	A0A1S3CTF8_CUCME,SubName: Full=major extracellular endoglucanase-like {ECO:0000313|RefSeq:XP_008467306.1};
Cla003615	-1.539	0	0	0	GO:0071944,cell periphery; GO:0009507,chloroplast; GO:0005634,nucleus; GO:0008124,4-alpha-hydroxytetrahydrobiopterin dehydratase activity; GO:0009737,response to abscisic acid; GO:0009651,response to salt stress; GO:0006729,tetrahydrobiopterin biosynthetic process	--	At5g51110	ref|XP_008436971.1|	ATP1_ARATH,RecName: Full=Probable pterin-4-alpha-carbinolamine dehydratase, chloroplastic {ECO:0000305}; EC=4.2.1.96 {ECO:0000305}; AltName: Full=4-alpha-hydroxy-tetrahydropterin dehydratase {ECO:0000305}; AltName: Full=PCD/DCoH-like protein 1 {ECO:0000303|Ref.1}; AltName: Full=Protein AIRP2 TARGET PROTEIN 1 {ECO:0000303|PubMed:28626006}; AltName: Full=Protein SDIR1-INTERACTING PROTEIN 1 {ECO:000…	A0A1S3ASJ9_CUCME,SubName: Full=putative pterin-4-alpha-carbinolamine dehydratase {ECO:0000313|RefSeq:XP_008436971.1};
Cla003808	1.011	0	0	0	--	--	At4g19950	ref|XP_008466696.1|	--	A0A1S3CRV6_CUCME,SubName: Full=uncharacterized protein LOC103504045 {ECO:0000313|RefSeq:XP_008466696.1};
Cla003829	2.261	0	0	0	GO:0071944,cell periphery; GO:0005618,cell wall; GO:0005576,extracellular region; GO:0045330,aspartyl esterase activity; GO:0030599,pectinesterase activity; GO:0046910,pectinesterase inhibitor activity; GO:0042545,cell wall modification; GO:0045490,pectin catabolic process	K01051: E3.1.1.11; pectinesterase [EC:3.1.1.11]	At3g47400	ref|XP_008452338.1|	PME33_ARATH,RecName: Full=Probable pectinesterase/pectinesterase inhibitor 33; Includes: RecName: Full=Pectinesterase inhibitor 33; AltName: Full=Pectin methylesterase inhibitor 33; Includes: RecName: Full=Pectinesterase 33; Short=PE 33; EC=3.1.1.11; AltName: Full=Pectin methylesterase 33; Short=AtPME33; Flags: Precursor;	A0A1S3BUR4_CUCME,RecName: Full=Pectinesterase {ECO:0000256|RuleBase:RU000589}; EC=3.1.1.11 {ECO:0000256|RuleBase:RU000589};
Cla003866	-1.714	0	0	0	--	--	--	ref|XP_002264858.1|	--	F6HZZ6_VITVI,SubName: Full=Uncharacterized protein {ECO:0000313|EMBL:CCB60262.1};
Cla003898	-2.684	0	0	0	GO:0005829,cytosol; GO:0003700,DNA binding transcription factor activity; GO:0046872,metal ion binding; GO:0003730,mRNA 3'-UTR binding; GO:0044212,transcription regulatory region DNA binding; GO:0061158,3'-UTR-mediated mRNA destabilization; GO:0006355,regulation of transcription, DNA-templated	K18753: ZFP36L; butyrate response factor	At1g68200	ref|XP_008467171.1|	C3H15_ARATH,RecName: Full=Zinc finger CCCH domain-containing protein 15; Short=AtC3H15;	A0A1S3CSW3_CUCME,SubName: Full=zinc finger CCCH domain-containing protein 15-like isoform X1 {ECO:0000313|RefSeq:XP_008467171.1};
Cla003918	0	1.09	0	0	--	--	At2g01300	ref|XP_022989988.1|	--	A0A0A0KPI5_CUCSA,SubName: Full=Uncharacterized protein {ECO:0000313|EMBL:KGN51505.1};
Cla003933	-1.149	0	0	0	GO:0009535,chloroplast thylakoid membrane; GO:0016021,integral component of membrane; GO:0010598,NAD(P)H dehydrogenase complex (plastoquinone); GO:0042651,thylakoid membrane; GO:0016655,oxidoreductase activity, acting on NAD(P)H, quinone or similar compound as acceptor; GO:0048038,quinone binding; GO:0010258,NADH dehydrogenase complex (plastoquinone) assembly; GO:0009773,photosynthetic electron t…	--	At1g70760	ref|XP_023527074.1|	NDHL_ARATH,RecName: Full=NAD(P)H-quinone oxidoreductase subunit L, chloroplastic; EC=1.6.5.- {ECO:0000305}; AltName: Full=NAD(P)H dehydrogenase subunit L {ECO:0000303|PubMed:21785130}; Short=NDH subunit L {ECO:0000305}; Short=NDH-L {ECO:0000305}; AltName: Full=NADH-plastoquinone oxidoreductase subunit L {ECO:0000305}; AltName: Full=Protein CHLORORESPIRATORY REDUCTION 23 {ECO:0000303|PubMed:183881…	A0A0A0KSV9_CUCSA,SubName: Full=Uncharacterized protein {ECO:0000313|EMBL:KGN51487.1};
Cla003960	2.818	0	0	-1.291	GO:0003723,RNA binding; GO:0003968,RNA-directed 5'-3' RNA polymerase activity; GO:0006952,defense response; GO:0060148,positive regulation of posttranscriptional gene silencing; GO:0030422,production of siRNA involved in RNA interference; GO:0009751,response to salicylic acid; GO:0009615,response to virus; GO:0010025,wax biosynthetic process	K11699: RDR, RDRP; RNA-dependent RNA polymerase [EC:2.7.7.48]	At1g14790	gb|KGN51474.1|	RDR1_ARATH,RecName: Full=RNA-dependent RNA polymerase 1; Short=AtRDRP1; EC=2.7.7.48; AltName: Full=RNA-directed RNA polymerase 1;	A0A0A0KRH3_CUCSA,RecName: Full=RNA-dependent RNA polymerase {ECO:0000256|RuleBase:RU363098}; EC=2.7.7.48 {ECO:0000256|RuleBase:RU363098};
Cla003974	-1.23	0	0	0	--	--	At5g02020	ref|XP_008464894.1|	--	A0A1S4E4X0_CUCME,SubName: Full=uncharacterized protein LOC103502653 {ECO:0000313|RefSeq:XP_008464894.1, ECO:0000313|RefSeq:XP_016903275.1, ECO:0000313|RefSeq:XP_016903276.1};
Cla003979	6.612	0	0	0	GO:0005576,extracellular region; GO:0004252,serine-type endopeptidase activity	--	--	gb|AEM42989.1|	CUCM1_CUCME,RecName: Full=Cucumisin; EC=3.4.21.25; AltName: Allergen=Cuc m 1; Flags: Precursor;	K7NBW1_SIRGR,SubName: Full=Cucumisin {ECO:0000313|EMBL:AEM42989.1};
Cla004017	0	1.132	0	0	GO:0042973,glucan endo-1,3-beta-D-glucosidase activity; GO:0005975,carbohydrate metabolic process; GO:0006952,defense response	K19891: GN1_2_3; glucan endo-1,3-beta-glucosidase 1/2/3 [EC:3.2.1.39]	At3g55430	ref|XP_008461659.1|	E13B_WHEAT,RecName: Full=Glucan endo-1,3-beta-glucosidase; EC=3.2.1.39; AltName: Full=(1->3)-beta-glucan endohydrolase; Short=(1->3)-beta-glucanase; AltName: Full=Beta-1,3-endoglucanase; Flags: Precursor;	A0A1S3CF05_CUCME,SubName: Full=glucan endo-1,3-beta-glucosidase {ECO:0000313|RefSeq:XP_008461659.1};
Cla004033	-1.021	0	0	0	--	--	--	ref|XP_022138964.1|	--	A0A1S3CGQ2_CUCME,SubName: Full=uncharacterized protein LOC103500268 {ECO:0000313|RefSeq:XP_008461735.1};
Cla004095	-1.109	0	0	0	GO:0004842,ubiquitin-protein transferase activity; GO:0009877,nodulation	--	--	ref|XP_011648557.1|	LIN1_LOTJA,RecName: Full=Putative E3 ubiquitin-protein ligase LIN-1 {ECO:0000250|UniProtKB:D1FP53}; EC=2.3.2.27 {ECO:0000303|PubMed:19508425}; AltName: Full=Protein cerberus {ECO:0000303|PubMed:19508425}; AltName: Full=RING-type E3 ubiquitin transferase LIN-1 {ECO:0000305};	A0A0A0M114_CUCSA,RecName: Full=RING-type E3 ubiquitin transferase {ECO:0000256|SAAS:SAAS00702733}; EC=2.3.2.27 {ECO:0000256|SAAS:SAAS00702733};
Cla004111	0	0	0	-1.069	GO:0016021,integral component of membrane; GO:0046872,metal ion binding; GO:0061630,ubiquitin protein ligase activity; GO:0004842,ubiquitin-protein transferase activity; GO:0043161,proteasome-mediated ubiquitin-dependent protein catabolic process; GO:0016567,protein ubiquitination	K10664: ATL6S; E3 ubiquitin-protein ligase ATL6/9/15/31/42/55 [EC:2.3.2.27]	At4g28890	ref|XP_004151734.2|	ATL42_ARATH,RecName: Full=E3 ubiquitin-protein ligase ATL42; EC=2.3.2.27 {ECO:0000269|PubMed:15644464}; AltName: Full=RING-H2 finger protein ATL42; AltName: Full=RING-type E3 ubiquitin transferase ATL42 {ECO:0000305}; Flags: Precursor;	A0A1S3CHK3_CUCME,SubName: Full=E3 ubiquitin-protein ligase ATL42-like {ECO:0000313|RefSeq:XP_008462695.1};
Cla004148	1.095	0	0	0	GO:0009793,embryo development ending in seed dormancy	--	At2g02250	ref|XP_008441744.1|	FB95_ARATH,RecName: Full=F-box protein At2g02240;	A0A1S3B458_CUCME,SubName: Full=F-box protein PP2-B10-like {ECO:0000313|RefSeq:XP_008441744.1};
Cla004162	0	0	0	-1.749	GO:0016021,integral component of membrane; GO:0005886,plasma membrane; GO:0055055,D-glucose:proton symporter activity; GO:0005354,galactose transmembrane transporter activity; GO:0009679,hexose:proton symporter activity; GO:0015578,mannose transmembrane transporter activity; GO:0071333,cellular response to glucose stimulus; GO:0046323,glucose import; GO:0035428,NA	--	At3g19940	ref|XP_008441745.1|	STP10_ARATH,RecName: Full=Sugar transport protein 10; AltName: Full=Hexose transporter 10;	A0A1S3B447_CUCME,SubName: Full=sugar transport protein 10-like {ECO:0000313|RefSeq:XP_008441745.1};
Cla004163	0	0	0	-2.244	GO:0016021,integral component of membrane; GO:0005886,plasma membrane; GO:0055055,D-glucose:proton symporter activity; GO:0005354,galactose transmembrane transporter activity; GO:0009679,hexose:proton symporter activity; GO:0015578,mannose transmembrane transporter activity; GO:0071333,cellular response to glucose stimulus; GO:0046323,glucose import; GO:0035428,NA	--	At3g19940	ref|XP_008441745.1|	STP10_ARATH,RecName: Full=Sugar transport protein 10; AltName: Full=Hexose transporter 10;	A0A1S3B447_CUCME,SubName: Full=sugar transport protein 10-like {ECO:0000313|RefSeq:XP_008441745.1};
Cla004197	-1.121	0	0	0	GO:0031225,anchored component of membrane; GO:0046658,anchored component of plasma membrane; GO:0005886,plasma membrane; GO:0009506,plasmodesma; GO:0009055,electron transfer activity	--	At3g20570	ref|XP_008454534.1|	ENL3_ARATH,RecName: Full=Early nodulin-like protein 3; AltName: Full=Phytocyanin-like protein; Flags: Precursor;	A0A1S3BYY3_CUCME,SubName: Full=early nodulin-like protein 3 {ECO:0000313|RefSeq:XP_008454534.1};
Cla004220	0	0	1.551	-2.337	GO:0016021,integral component of membrane; GO:0000325,plant-type vacuole; GO:0005774,vacuolar membrane; GO:0005524,ATP binding; GO:0042626,ATPase activity, coupled to transmembrane movement of substances; GO:0008559,xenobiotic transmembrane transporting ATPase activity; GO:0055085,transmembrane transport	K05666: ABCC2; ATP-binding cassette, subfamily C (CFTR/MRP), member 2	At3g59140	ref|XP_008439320.1|	AB10C_ARATH,RecName: Full=ABC transporter C family member 10; Short=ABC transporter ABCC.10; Short=AtABCC10; EC=3.6.3.44; AltName: Full=ATP-energized glutathione S-conjugate pump 14; AltName: Full=Glutathione S-conjugate-transporting ATPase 14; AltName: Full=Multidrug resistance-associated protein 14;	A0A1S3AZ65_CUCME,SubName: Full=ABC transporter C family member 10 {ECO:0000313|RefSeq:XP_008439320.1, ECO:0000313|RefSeq:XP_008439321.1};
Cla004239	0	0	1.231	0	--	--	--	--	--	--
Cla004243	-2.181	0	0	0	GO:0046872,metal ion binding; GO:0004722,protein serine/threonine phosphatase activity	K14497: PP2C; protein phosphatase 2C [EC:3.1.3.16]	At2g29380	ref|XP_008441614.1|	P2C08_ORYSJ,RecName: Full=Probable protein phosphatase 2C 8; Short=OsPP2C08; EC=3.1.3.16;	A0A1S3B4G9_CUCME,SubName: Full=probable protein phosphatase 2C 8 {ECO:0000313|RefSeq:XP_008441614.1};
Cla004348	0	1.471	0	0	GO:0016021,integral component of membrane; GO:0005524,ATP binding; GO:0042803,protein homodimerization activity; GO:0004674,protein serine/threonine kinase activity	--	At3g55950	ref|XP_008463240.1|	ACCR3_ARATH,RecName: Full=Putative serine/threonine-protein kinase-like protein CCR3; EC=2.7.11.1; AltName: Full=Protein CRINKLY 4 RELATED 3; Short=AtCRR3; Flags: Precursor;	A0A1S3CIT2_CUCME,SubName: Full=putative serine/threonine-protein kinase-like protein CCR3 {ECO:0000313|RefSeq:XP_008463240.1};
Cla004358	1.036	0	0	0	--	--	At3g11150	ref|XP_011654997.1|	--	A0A1S3CNS4_CUCME,SubName: Full=1-aminocyclopropane-1-carboxylate oxidase {ECO:0000313|RefSeq:XP_008465218.1};
Cla004468	1.177	0	0	0	GO:0005887,integral component of plasma membrane; GO:0016020,membrane; GO:0035673,oligopeptide transmembrane transporter activity; GO:0015031,protein transport	--	At5g55930	ref|XP_004148255.1|	OPT1_ARATH,RecName: Full=Oligopeptide transporter 1; Short=AtOPT1;	A0A0A0L7F5_CUCSA,SubName: Full=Uncharacterized protein {ECO:0000313|EMBL:KGN56026.1};
Cla004483	-1.402	0	0	0	GO:0009507,chloroplast; GO:0009941,chloroplast envelope; GO:0031969,chloroplast membrane; GO:0030093,chloroplast photosystem I; GO:0009534,chloroplast thylakoid; GO:0009535,chloroplast thylakoid membrane; GO:0016021,integral component of membrane; GO:0009579,thylakoid; GO:0016168,chlorophyll binding; GO:0015979,photosynthesis; GO:0009773,photosynthetic electron transport in photosystem I; GO:0009…	--	At1g55670	ref|XP_008449063.1|	PSAG_ARATH,RecName: Full=Photosystem I reaction center subunit V, chloroplastic; AltName: Full=PSI-G; Flags: Precursor;	A0A1S3BKK6_CUCME,SubName: Full=photosystem I reaction center subunit V, chloroplastic {ECO:0000313|RefSeq:XP_008449063.1};
Cla004542	-1.104	0	0	0	GO:0005886,plasma membrane; GO:0003779,actin binding	--	At2g22560	ref|XP_008452167.1|	NET2D_ARATH,RecName: Full=Protein NETWORKED 2D {ECO:0000303|PubMed:22840520};	A0A1S3BT90_CUCME,SubName: Full=protein NETWORKED 2B {ECO:0000313|RefSeq:XP_008452167.1};
Cla004568	0	0	0	-1.527	GO:0005788,endoplasmic reticulum lumen	K13993: HSP20; HSP20 family protein	At4g10250	ref|XP_004133737.1|	HSP41_SOYBN,RecName: Full=22.0 kDa class IV heat shock protein; Flags: Precursor;	A0A0A0L6S3_CUCSA,SubName: Full=Heat-shock protein {ECO:0000313|EMBL:KGN56287.1};
Cla004579	-1.25	0	0	0	--	--	At3g18670	ref|XP_022975228.1|	--	A0A1S3C9K3_CUCME,SubName: Full=protein ACCELERATED CELL DEATH 6-like {ECO:0000313|RefSeq:XP_008459132.1};
Cla004643	-1.251	0	0	0	GO:0009507,chloroplast; GO:0005634,nucleus; GO:0045036,protein targeting to chloroplast; GO:0006355,regulation of transcription, DNA-templated	--	At5g14370	ref|XP_008458850.1|	CIA2_ARATH,RecName: Full=Protein CHLOROPLAST IMPORT APPARATUS 2; Flags: Precursor;	A0A1S3C8T7_CUCME,SubName: Full=zinc finger protein CONSTANS-LIKE 6 {ECO:0000313|RefSeq:XP_008458850.1};
Cla004644	0	0	0	1.188	GO:0051087,chaperone binding	--	At5g14360	ref|XP_004142771.1|	BAG2_ARATH,RecName: Full=BAG family molecular chaperone regulator 2; AltName: Full=Bcl-2-associated athanogene 2;	A0A0A0KNY5_CUCSA,SubName: Full=Protein binding protein {ECO:0000313|EMBL:KGN51333.1};
Cla004671	-1.454	0	0	0	--	K14009: BCAP31, BAP31; B-cell receptor-associated protein 31	At5g42570	ref|XP_022954156.1|	--	A0A0A0KNS5_CUCSA,SubName: Full=Uncharacterized protein {ECO:0000313|EMBL:KGN51300.1};
Cla004677	1.207	0	0	0	GO:0048046,apoplast; GO:0005618,cell wall; GO:0005829,cytosol; GO:0005794,Golgi apparatus; GO:0005739,mitochondrion; GO:0005634,nucleus; GO:0005886,plasma membrane; GO:0005774,vacuolar membrane; GO:0005524,ATP binding; GO:0031625,ubiquitin protein ligase binding; GO:0016567,protein ubiquitination; GO:0006355,regulation of transcription, DNA-templated; GO:0009617,response to bacterium; GO:0046686,…	K03283: HSPA1s; heat shock 70kDa protein 1/2/6/8	At3g12580	gb|OWM87513.1|	MD37C_ARATH,RecName: Full=Probable mediator of RNA polymerase II transcription subunit 37c; AltName: Full=Heat shock 70 kDa protein 4; AltName: Full=Heat shock cognate 70 kDa protein 4; AltName: Full=Heat shock cognate protein 70-4; Short=AtHsc70-4; AltName: Full=Heat shock protein 70-4; Short=AtHsp70-4;	A0A218XRE2_PUNGR,SubName: Full=Uncharacterized protein {ECO:0000313|EMBL:OWM87513.1};
Cla004683	1.103	0	0	0	GO:0005618,cell wall; GO:0005829,cytosol; GO:0005794,Golgi apparatus; GO:0005634,nucleus; GO:0005886,plasma membrane; GO:0005524,ATP binding; GO:0006355,regulation of transcription, DNA-templated; GO:0009617,response to bacterium; GO:0046686,response to cadmium ion; GO:0009408,response to heat; GO:0009615,response to virus; GO:0006351,transcription, DNA-templated	K03283: HSPA1s; heat shock 70kDa protein 1/2/6/8	At5g02490	gb|OWM87513.1|	MD37D_ARATH,RecName: Full=Probable mediator of RNA polymerase II transcription subunit 37c; AltName: Full=Heat shock 70 kDa protein 2; AltName: Full=Heat shock cognate 70 kDa protein 2; AltName: Full=Heat shock cognate protein 70-2; Short=AtHsc70-2; AltName: Full=Heat shock protein 70-2; Short=AtHsp70-2;	A0A218XRE2_PUNGR,SubName: Full=Uncharacterized protein {ECO:0000313|EMBL:OWM87513.1};
Cla004691	0	0	0	-1.014	--	K00164: OGDH, sucA; 2-oxoglutarate dehydrogenase E1 component [EC:1.2.4.2]	At5g65750	ref|XP_004142737.1|	--	A0A0A0KQV1_CUCSA,SubName: Full=Uncharacterized protein {ECO:0000313|EMBL:KGN51279.1};
Cla004767	1.155	0	0	0	GO:0000148,1,3-beta-D-glucan synthase complex; GO:0005794,Golgi apparatus; GO:0016021,integral component of membrane; GO:0005886,plasma membrane; GO:0003843,1,3-beta-D-glucan synthase activity; GO:0006075,(1->3)-beta-D-glucan biosynthetic process; GO:0052543,callose deposition in cell wall; GO:0048589,developmental growth; GO:0055047,generative cell mitosis; GO:0009556,microsporogenesis; GO:00095…	--	At3g07160	gb|KGN66426.1|	CALS9_ARATH,RecName: Full=Callose synthase 9; EC=2.4.1.34; AltName: Full=1,3-beta-glucan synthase; AltName: Full=Protein GLUCAN SYNTHASE-LIKE 10;	A0A0A0M2K8_CUCSA,SubName: Full=Uncharacterized protein {ECO:0000313|EMBL:KGN66426.1};
Cla004768	1.472	0	0	0	GO:0000148,1,3-beta-D-glucan synthase complex; GO:0005794,Golgi apparatus; GO:0016021,integral component of membrane; GO:0005886,plasma membrane; GO:0003843,1,3-beta-D-glucan synthase activity; GO:0006075,(1->3)-beta-D-glucan biosynthetic process; GO:0052543,callose deposition in cell wall; GO:0048589,developmental growth; GO:0055047,generative cell mitosis; GO:0009556,microsporogenesis; GO:00095…	--	At3g07160	ref|XP_023531963.1|	CALS9_ARATH,RecName: Full=Callose synthase 9; EC=2.4.1.34; AltName: Full=1,3-beta-glucan synthase; AltName: Full=Protein GLUCAN SYNTHASE-LIKE 10;	A0A1S4DYC5_CUCME,SubName: Full=callose synthase 9 {ECO:0000313|RefSeq:XP_008451107.1, ECO:0000313|RefSeq:XP_016900973.1};
Cla004771	2.003	0	0	0	GO:0000148,1,3-beta-D-glucan synthase complex; GO:0005794,Golgi apparatus; GO:0016021,integral component of membrane; GO:0005886,plasma membrane; GO:0003843,1,3-beta-D-glucan synthase activity; GO:0006075,(1->3)-beta-D-glucan biosynthetic process; GO:0052543,callose deposition in cell wall; GO:0048589,developmental growth; GO:0055047,generative cell mitosis; GO:0009556,microsporogenesis; GO:00095…	K11000: CALS; callose synthase [EC:2.4.1.-]	At3g07160	gb|KGN66429.1|	CALS9_ARATH,RecName: Full=Callose synthase 9; EC=2.4.1.34; AltName: Full=1,3-beta-glucan synthase; AltName: Full=Protein GLUCAN SYNTHASE-LIKE 10;	A0A0A0LZH8_CUCSA,SubName: Full=Uncharacterized protein {ECO:0000313|EMBL:KGN66429.1};
Cla004891	0	0	0	-2.278	--	--	At5g53050	ref|XP_004145933.1|	--	A0A0A0KLW7_CUCSA,SubName: Full=Uncharacterized protein {ECO:0000313|EMBL:KGN49859.1};
Cla004896	-1.02	0	0	0	GO:0071944,cell periphery; GO:0005618,cell wall; GO:0016021,integral component of membrane; GO:0045330,aspartyl esterase activity; GO:0030599,pectinesterase activity; GO:0046910,pectinesterase inhibitor activity; GO:0042545,cell wall modification; GO:0045490,pectin catabolic process	--	At5g53370	ref|XP_011654619.1|	PME61_ARATH,RecName: Full=Probable pectinesterase/pectinesterase inhibitor 61; Includes: RecName: Full=Pectinesterase inhibitor 61; AltName: Full=Pectin methylesterase inhibitor 61; Includes: RecName: Full=Pectinesterase 61; Short=PE 61; EC=3.1.1.11; AltName: Full=AtPMEpcrF; AltName: Full=Pectin methylesterase 61; Short=AtPME61;	A0A0A0KJG1_CUCSA,RecName: Full=Pectinesterase {ECO:0000256|RuleBase:RU000589}; EC=3.1.1.11 {ECO:0000256|RuleBase:RU000589};
Cla004902	-1.256	0	0	0	GO:0005887,integral component of plasma membrane; GO:0005886,plasma membrane; GO:0005516,calmodulin binding; GO:0030552,cAMP binding; GO:0030553,cGMP binding; GO:0005216,ion channel activity; GO:0042391,regulation of membrane potential	K05391: CNGC; cyclic nucleotide gated channel, plant	At5g53130	ref|XP_004145926.1|	CNGC1_ARATH,RecName: Full=Cyclic nucleotide-gated ion channel 1; Short=AtCNGC1; AltName: Full=Cyclic nucleotide- and calmodulin-regulated ion channel 1;	A0A0A0KJV8_CUCSA,SubName: Full=Uncharacterized protein {ECO:0000313|EMBL:KGN49873.1};
Cla004909	3.123	0	0	0	GO:0016021,integral component of membrane; GO:0005887,integral component of plasma membrane; GO:0051119,sugar transmembrane transporter activity; GO:0008643,carbohydrate transport	K15382: SLC50A, SWEET; solute carrier family 50 (sugar transporter)	At5g53190	ref|XP_011654626.1|	SWT3B_ORYSJ,RecName: Full=Bidirectional sugar transporter SWEET3b; Short=OsSWEET3b;	A0A0A0KNA4_CUCSA,RecName: Full=Bidirectional sugar transporter SWEET {ECO:0000256|RuleBase:RU910715};
Cla004952	0	0	0	1.803	--	--	At5g52420	ref|XP_008437515.1|	--	A0A1S3AUS6_CUCME,SubName: Full=uncharacterized protein LOC103482907 {ECO:0000313|RefSeq:XP_008437515.1};
Cla004962	0	0	0	-4.443	GO:0005887,integral component of plasma membrane; GO:0016328,lateral plasma membrane; GO:0005886,plasma membrane; GO:0046715,active borate transmembrane transporter activity; GO:0015105,arsenite transmembrane transporter activity; GO:0015250,water channel activity; GO:0015700,arsenite transport; GO:0046713,borate transport; GO:0080029,cellular response to boron-containing substance levels; GO:004…	K09874: NIP; aquaporin NIP	At4g10380	ref|XP_008437497.1|	NIP51_ARATH,RecName: Full=Probable aquaporin NIP5-1; AltName: Full=NOD26-like intrinsic protein 5-1; Short=AtNIP5;1; AltName: Full=Nodulin-26-like major intrinsic protein 6; Short=NodLikeMip6; Short=Protein NLM6;	A0A1S3AU64_CUCME,SubName: Full=probable aquaporin NIP5-1 {ECO:0000313|RefSeq:XP_008437497.1};
Cla004979	0	0	0	-1.217	GO:0016021,integral component of membrane; GO:0005886,plasma membrane; GO:0022857,transmembrane transporter activity	--	At4g01440	ref|XP_004145962.2|	WTR24_ARATH,RecName: Full=WAT1-related protein At3g30340;	A0A0A0KNK7_CUCSA,RecName: Full=WAT1-related protein {ECO:0000256|RuleBase:RU363077};
Cla004982	3.832	0	0	-2.891	GO:0051213,dioxygenase activity; GO:0046872,metal ion binding; GO:0002229,defense response to oomycetes; GO:0046244,salicylic acid catabolic process	--	At4g10490	ref|XP_008437463.1|	DLO2_ARATH,RecName: Full=Protein DMR6-LIKE OXYGENASE 2 {ECO:0000303|PubMed:25376907}; EC=1.14.11.- {ECO:0000255|PROSITE-ProRule:PRU00805}; AltName: Full=2-oxoglutarate (2OG)-Fe(II) oxygenase-like protein DLO2 {ECO:0000303|PubMed:25376907}; AltName: Full=Salicylate 3-hydroxylase DLO2 {ECO:0000305}; Short=S3H DLO2 {ECO:0000305}; Short=SA 3-hydroxylase DLO2 {ECO:0000305}; Short=Salicylic acid 3-hydr…	A0A1S3AUN9_CUCME,SubName: Full=protein DMR6-LIKE OXYGENASE 2-like {ECO:0000313|RefSeq:XP_008437463.1};
Cla004987	0	2.141	0	0	--	--	At1g32920	ref|XP_023522684.1|	--	A0A0A0KJT8_CUCSA,SubName: Full=Uncharacterized protein {ECO:0000313|EMBL:KGN49970.1};
Cla005041	-3.342	0	0	0	GO:0048046,apoplast; GO:0005507,copper ion binding; GO:0052716,hydroquinone:oxygen oxidoreductase activity; GO:0016491,oxidoreductase activity; GO:0016722,oxidoreductase activity, oxidizing metal ions; GO:0009809,lignin biosynthetic process; GO:0046274,lignin catabolic process; GO:0009698,phenylpropanoid metabolic process	K05909: E1.10.3.2; laccase [EC:1.10.3.2]	At5g60020	ref|XP_016478087.1|	LAC17_ARATH,RecName: Full=Laccase-17; EC=1.10.3.2; AltName: Full=Benzenediol:oxygen oxidoreductase 17; AltName: Full=Diphenol oxidase 17; AltName: Full=Urishiol oxidase 17; Flags: Precursor;	A0A1S4AMY5_TOBAC,SubName: Full=laccase-17-like {ECO:0000313|RefSeq:XP_016478087.1};
Cla005046	1.318	0	0	0	GO:0016021,integral component of membrane; GO:0005886,plasma membrane; GO:0005516,calmodulin binding; GO:0006952,defense response; GO:0009607,response to biotic stimulus	K08472: MLO; mlo protein	At3g45290	ref|XP_008463703.1|	MLO3_ARATH,RecName: Full=MLO-like protein 3; Short=AtMlo3;	A0A1S3CJV7_CUCME,RecName: Full=MLO-like protein {ECO:0000256|RuleBase:RU280816};
Cla005052	0	0	0	-1.087	GO:0005739,mitochondrion	--	At1g07900	ref|XP_004147298.1|	LBD1_ARATH,RecName: Full=LOB domain-containing protein 1; AltName: Full=ASYMMETRIC LEAVES 2-like protein 8; Short=AS2-like protein 8;	A0A0A0LUS4_CUCSA,SubName: Full=Uncharacterized protein {ECO:0000313|EMBL:KGN64754.1};
Cla005065	5.422	0	0	0	GO:0005618,cell wall; GO:0005576,extracellular region; GO:0009506,plasmodesma; GO:0050660,flavin adenine dinucleotide binding; GO:0016614,oxidoreductase activity, acting on CH-OH group of donors	K22395: K22395; cinnamyl-alcohol dehydrogenase [EC:1.1.1.195]	At5g44400	ref|XP_022964765.1|	BBE26_ARATH,RecName: Full=Berberine bridge enzyme-like 26 {ECO:0000303|PubMed:26037923}; Short=AtBBE-like 26 {ECO:0000303|PubMed:26037923}; EC=1.1.1.- {ECO:0000250|UniProtKB:O64743}; Flags: Precursor;	A0A1S3CIZ3_CUCME,SubName: Full=tetrahydrocannabinolic acid synthase-like {ECO:0000313|RefSeq:XP_008463307.2};
Cla005094	-1.128	0	0	0	GO:0005576,extracellular region; GO:0005773,vacuole; GO:0004185,serine-type carboxypeptidase activity; GO:0051603,proteolysis involved in cellular protein catabolic process	K16298: SCPL-IV; serine carboxypeptidase-like clade IV [EC:3.4.16.-]	At3g45010	ref|XP_022964904.1|	SCP48_ARATH,RecName: Full=Serine carboxypeptidase-like 48; EC=3.4.16.-; Flags: Precursor;	A0A1S3CJT6_CUCME,RecName: Full=Carboxypeptidase {ECO:0000256|RuleBase:RU361156}; EC=3.4.16.- {ECO:0000256|RuleBase:RU361156};
Cla005104	-1.257	0	0	0	--	--	--	--	--	--
Cla005156	-2.292	0	0	0	GO:0005634,nucleus; GO:0003677,DNA binding; GO:0003700,DNA binding transcription factor activity; GO:0046983,protein dimerization activity; GO:0006351,transcription, DNA-templated	--	At1g09250	ref|XP_023516409.1|	BH149_ARATH,RecName: Full=Transcription factor bHLH149; AltName: Full=ATBS1 interacting factor 4; AltName: Full=Basic helix-loop-helix protein 149; Short=AtbHLH149; Short=bHLH 149; AltName: Full=Transcription factor EN 144; AltName: Full=bHLH transcription factor bHLH149;	A0A1S4DY77_CUCME,SubName: Full=transcription factor bHLH149-like {ECO:0000313|RefSeq:XP_008450537.1, ECO:0000313|RefSeq:XP_016900939.1};
Cla005159	3.398	4.289	0	0	GO:0030410,nicotianamine synthase activity; GO:0030418,nicotianamine biosynthetic process; GO:0010233,phloem transport; GO:0009555,pollen development; GO:0009860,pollen tube growth	K05953: E2.5.1.43; nicotianamine synthase [EC:2.5.1.43]	At1g56430	ref|XP_008450545.1|	NAS4_ARATH,RecName: Full=Probable nicotianamine synthase 4; EC=2.5.1.43; AltName: Full=S-adenosyl-L-methionine:S-adenosyl-L-methionine:S-adenosyl-methionine 3-amino-3-carboxypropyltransferase 4;	A0A1S3BPH1_CUCME,SubName: Full=nicotianamine synthase-like {ECO:0000313|RefSeq:XP_008450545.1};
Cla005187	0	0	0	4.32	GO:0005634,nucleus; GO:0005516,calmodulin binding; GO:0003700,DNA binding transcription factor activity; GO:0043565,sequence-specific DNA binding; GO:0009738,abscisic acid-activated signaling pathway; GO:0071456,cellular response to hypoxia; GO:0071219,cellular response to molecule of bacterial origin; GO:0042742,defense response to bacterium; GO:0009816,defense response to bacterium, incompatibl…	--	At5g62570	ref|XP_008450592.1|	CB60G_ARATH,RecName: Full=Calmodulin-binding protein 60 G {ECO:0000303|PubMed:11782485};	A0A1S3BQ76_CUCME,SubName: Full=calmodulin-binding protein 60 G-like {ECO:0000313|RefSeq:XP_008450592.1, ECO:0000313|RefSeq:XP_008450593.1};
Cla005202	1.007	0	0	0	GO:0005737,cytoplasm; GO:0005524,ATP binding; GO:0051082,unfolded protein binding; GO:0006457,protein folding; GO:0006950,response to stress	K04079: HSP90A, htpG; molecular chaperone HtpG	At5g56000	ref|XP_011659851.1|	HSP80_SOLLC,RecName: Full=Heat shock cognate protein 80;	A0A0A0LVZ8_CUCSA,SubName: Full=Uncharacterized protein {ECO:0000313|EMBL:KGN66050.1};
Cla005203	-1.351	0	0	0	GO:0016021,integral component of membrane; GO:0005887,integral component of plasma membrane; GO:0051119,sugar transmembrane transporter activity; GO:0008643,carbohydrate transport	K15382: SLC50A, SWEET; solute carrier family 50 (sugar transporter)	At4g10850	ref|XP_004135601.1|	SWT16_ORYSJ,RecName: Full=Bidirectional sugar transporter SWEET16; Short=OsSWEET16;	A0A0A0M1I0_CUCSA,RecName: Full=Bidirectional sugar transporter SWEET {ECO:0000256|RuleBase:RU910715};
Cla005226	2.872	0	0	0	GO:0005789,endoplasmic reticulum membrane; GO:0016021,integral component of membrane; GO:0005886,plasma membrane; GO:0032586,protein storage vacuole membrane	--	At1g09070	ref|XP_011659891.1|	SRC2_SOYBN,RecName: Full=Protein SRC2 {ECO:0000305}; AltName: Full=Protein SOYBEAN GENE REGULATED BY COLD 2 {ECO:0000303|Ref.1};	A0A0A0LW10_CUCSA,SubName: Full=Uncharacterized protein {ECO:0000313|EMBL:KGN66070.1};
Cla005236	-1.073	0	0	0	GO:0031225,anchored component of membrane; GO:0005886,plasma membrane	--	At5g19250	ref|XP_004135621.1|	UGPI4_ARATH,RecName: Full=Uncharacterized GPI-anchored protein At3g06035; Flags: Precursor;	A0A1S3BQD0_CUCME,SubName: Full=uncharacterized GPI-anchored protein At5g19250-like {ECO:0000313|RefSeq:XP_008450653.1};
Cla005239	-1.259	0	0	0	GO:0009507,chloroplast; GO:0008106,alcohol dehydrogenase (NADP+) activity; GO:0055114,oxidation-reduction process	K00059: fabG; 3-oxoacyl-[acyl-carrier protein] reductase [EC:1.1.1.100]	At1g54870	ref|XP_022961377.1|	ADRC1_ARATH,RecName: Full=NADPH-dependent aldehyde reductase 1, chloroplastic {ECO:0000303|PubMed:21169366}; Short=AtChlADR1 {ECO:0000303|PubMed:21169366}; EC=1.1.1.- {ECO:0000269|PubMed:21169366}; AltName: Full=Glucose and ribitol dehydrogenase homolog 1; Flags: Precursor;	A0A1S3BQQ8_CUCME,SubName: Full=glucose and ribitol dehydrogenase homolog 1 {ECO:0000313|RefSeq:XP_008450654.1};
Cla005252	0	-1.46	0	0	GO:0005886,plasma membrane; GO:0005524,ATP binding; GO:0004675,transmembrane receptor protein serine/threonine kinase activity; GO:0009742,brassinosteroid mediated signaling pathway; GO:0007166,cell surface receptor signaling pathway; GO:1900459,positive regulation of brassinosteroid mediated signaling pathway; GO:0006468,protein phosphorylation	--	At1g54820	ref|XP_004135788.1|	PBL7_ARATH,RecName: Full=Probable serine/threonine-protein kinase PBL7 {ECO:0000305}; EC=2.7.11.1 {ECO:0000269|PubMed:21855796}; AltName: Full=CDG1-like protein 1 {ECO:0000303|PubMed:21855796}; AltName: Full=PBS1-like protein 7 {ECO:0000303|PubMed:20413097};	A0A0A0LYI7_CUCSA,SubName: Full=Uncharacterized protein {ECO:0000313|EMBL:KGN66099.1};
Cla005253	0	0	1.952	0	GO:0005634,nucleus; GO:0003677,DNA binding; GO:0003700,DNA binding transcription factor activity; GO:0046983,protein dimerization activity; GO:0006355,regulation of transcription, DNA-templated; GO:0006351,transcription, DNA-templated	--	At1g22490	ref|XP_008450677.1|	BH094_ARATH,RecName: Full=Transcription factor bHLH94; AltName: Full=Basic helix-loop-helix protein 94; Short=AtbHLH94; Short=bHLH 94; AltName: Full=Transcription factor EN 16; AltName: Full=bHLH transcription factor bHLH094;	A0A1S3BQS8_CUCME,SubName: Full=transcription factor bHLH94-like {ECO:0000313|RefSeq:XP_008450677.1};
Cla005258	-1.302	0	0	0	GO:0005509,calcium ion binding; GO:0009733,response to auxin	--	At4g27280	ref|XP_004152909.1|	PBP1_ARATH,RecName: Full=Calcium-binding protein PBP1; AltName: Full=KIC-related protein 2; AltName: Full=PINOID-binding protein 1;	A0A0A0L2H0_CUCSA,SubName: Full=Uncharacterized protein {ECO:0000313|EMBL:KGN56165.1};
Cla005283	-1.552	0	0	0	GO:0009507,chloroplast; GO:0005829,cytosol; GO:0005506,iron ion binding; GO:0006950,response to stress; GO:0009228,thiamine biosynthetic process; GO:0052837,thiazole biosynthetic process	K03146: THI4, THI1; cysteine-dependent adenosine diphosphate thiazole synthase [EC:2.4.2.60]	At5g54770	ref|XP_008463440.1|	THI42_VITVI,RecName: Full=Thiamine thiazole synthase 2, chloroplastic {ECO:0000255|HAMAP-Rule:MF_03158}; AltName: Full=Thiazole biosynthetic enzyme 2 {ECO:0000255|HAMAP-Rule:MF_03158}; Flags: Precursor;	A0A0A0L546_CUCSA,RecName: Full=Thiamine thiazole synthase, chloroplastic {ECO:0000256|HAMAP-Rule:MF_03158}; AltName: Full=Thiazole biosynthetic enzyme {ECO:0000256|HAMAP-Rule:MF_03158};
Cla005384	0	0	0	-1.462	GO:0048046,apoplast; GO:0005618,cell wall; GO:0005829,cytosol; GO:0005794,Golgi apparatus; GO:0009505,plant-type cell wall; GO:0005774,vacuolar membrane; GO:0030246,carbohydrate binding	--	At1g78850	ref|XP_008451767.1|	EP1L3_ARATH,RecName: Full=EP1-like glycoprotein 3 {ECO:0000303|PubMed:15276441}; AltName: Full=Curculin-like (Mannose-binding) lectin family protein {ECO:0000303|PubMed:23738689}; AltName: Full=Putative receptor-like protein kinase-like protein {ECO:0000303|PubMed:12833529}; Flags: Precursor;	A0A1S3BS79_CUCME,SubName: Full=epidermis-specific secreted glycoprotein EP1-like {ECO:0000313|RefSeq:XP_008451767.1};
Cla005397	-3.776	0	0	0	GO:0045543,gibberellin 2-beta-dioxygenase activity; GO:0046872,metal ion binding; GO:0009686,gibberellin biosynthetic process	K04125: E1.14.11.13; gibberellin 2beta-dioxygenase [EC:1.14.11.13]	At1g78440	gb|KGN53539.1|	G2OX1_PEA,RecName: Full=Gibberellin 2-beta-dioxygenase 1; EC=1.14.11.13; AltName: Full=GA 2-oxidase 1; AltName: Full=Gibberellin 2-beta-hydroxylase 1; AltName: Full=Gibberellin 2-oxidase 1; AltName: Full=Protein SLENDER;	A0A0A0KXI6_CUCSA,SubName: Full=Uncharacterized protein {ECO:0000313|EMBL:KGN53539.1};
Cla005402	0	0	0	-2.381	GO:0005618,cell wall; GO:0005576,extracellular region; GO:0047911,galacturan 1,4-alpha-galacturonidase activity; GO:0019863,IgE binding; GO:0004650,polygalacturonase activity; GO:0071555,cell wall organization; GO:0045490,pectin catabolic process	K01213: E3.2.1.67; galacturan 1,4-alpha-galacturonidase [EC:3.2.1.67]	At2g33160_1	ref|XP_016901151.1|	PGLR2_PLAAC,RecName: Full=Exopolygalacturonase; EC=3.2.1.67; AltName: Full=Pollen allergen Pla a 2; AltName: Allergen=Pla a 2; Flags: Precursor; Fragment;	A0A1S4DYT5_CUCME,SubName: Full=exopolygalacturonase {ECO:0000313|RefSeq:XP_016901151.1};
Cla005404	-3.909	0	0	0	GO:0009535,chloroplast thylakoid membrane; GO:0045549,9-cis-epoxycarotenoid dioxygenase activity; GO:0046872,metal ion binding; GO:0009688,abscisic acid biosynthetic process	K09840: NCED; 9-cis-epoxycarotenoid dioxygenase [EC:1.13.11.51]	At3g14440	gb|APO14273.1|	NCED1_PHAVU,RecName: Full=9-cis-epoxycarotenoid dioxygenase NCED1, chloroplastic; EC=1.13.11.51; AltName: Full=PvNCED1; Flags: Precursor;	A0A1L5JHV0_LUFAE,SubName: Full=9-cis-epoxycarotenoid dioxygenase NCED1 {ECO:0000313|EMBL:APO14273.1};
Cla005429	-1.029	0	0	0	GO:0009535,chloroplast thylakoid membrane; GO:0019898,extrinsic component of membrane; GO:0009654,photosystem II oxygen evolving complex; GO:0005509,calcium ion binding; GO:0015979,photosynthesis	K02717: psbP; photosystem II oxygen-evolving enhancer protein 2	At1g06680	ref|XP_016901191.1|	PSBP_CUCSA,RecName: Full=Oxygen-evolving enhancer protein 2, chloroplastic; Short=OEE2; AltName: Full=23 kDa subunit of oxygen evolving system of photosystem II; AltName: Full=23 kDa thylakoid membrane protein; AltName: Full=OEC 23 kDa subunit; AltName: Full=OEC23; Flags: Precursor;	A0A1S4DYX5_CUCME,SubName: Full=oxygen-evolving enhancer protein 2, chloroplastic {ECO:0000313|RefSeq:XP_016901191.1};
Cla005446	0	0	0	1.743	GO:0005737,cytoplasm; GO:0005634,nucleus; GO:0004871,signal transducer activity; GO:0009638,phototropism; GO:0016567,protein ubiquitination	--	At2g30510	ref|XP_004147730.1|	RPT2_ARATH,RecName: Full=Root phototropism protein 2; AltName: Full=BTB/POZ domain-containing protein RPT2;	A0A1S3BSL5_CUCME,SubName: Full=root phototropism protein 2 {ECO:0000313|RefSeq:XP_008451887.2, ECO:0000313|RefSeq:XP_008451888.1};
Cla005457	0	0	1.869	0	GO:0016021,integral component of membrane; GO:0010295,(+)-abscisic acid 8'-hydroxylase activity; GO:0020037,heme binding; GO:0005506,iron ion binding; GO:0046345,abscisic acid catabolic process; GO:0016132,brassinosteroid biosynthetic process; GO:0010268,brassinosteroid homeostasis; GO:0016125,sterol metabolic process	K09843: CYP707A; (+)-abscisic acid 8'-hydroxylase [EC:1.14.14.137]	At5g45340	ref|XP_022931288.1|	ABAH1_ARATH,RecName: Full=Abscisic acid 8'-hydroxylase 1; Short=ABA 8'-hydroxylase 1; EC=1.14.13.93; AltName: Full=Cytochrome P450 707A1;	A0A1S3BTM7_CUCME,SubName: Full=abscisic acid 8'-hydroxylase 1 {ECO:0000313|RefSeq:XP_008451873.1};
Cla005469	0	-1.258	0	0	GO:0016021,integral component of membrane; GO:0000741,karyogamy; GO:0010197,polar nucleus fusion; GO:0009651,response to salt stress	--	At1g31470	ref|XP_008451908.1|	NFD4_ARATH,RecName: Full=Protein NUCLEAR FUSION DEFECTIVE 4 {ECO:0000303|PubMed:16698901};	A0A1S3BTD8_CUCME,SubName: Full=protein NUCLEAR FUSION DEFECTIVE 4 {ECO:0000313|RefSeq:XP_008451908.1};
Cla005489	0	0	0	-1.547	GO:0009570,chloroplast stroma; GO:0009536,plastid; GO:0004365,glyceraldehyde-3-phosphate dehydrogenase (NAD+) (phosphorylating) activity; GO:0051287,NAD binding; GO:0050661,NADP binding; GO:0080144,amino acid homeostasis; GO:0005975,carbohydrate metabolic process; GO:0006006,glucose metabolic process; GO:0006096,glycolytic process; GO:0080022,primary root development	K00134: GAPDH, gapA; glyceraldehyde 3-phosphate dehydrogenase [EC:1.2.1.12]	At1g16300	ref|XP_008447086.1|	G3PP2_ARATH,RecName: Full=Glyceraldehyde-3-phosphate dehydrogenase GAPCP2, chloroplastic; EC=1.2.1.12; AltName: Full=Glyceraldehyde-3-phosphate dehydrogenase of plastid 2; AltName: Full=NAD-dependent glyceraldehydephosphate dehydrogenase chloroplastic 2; Flags: Precursor;	A0A1S3BH73_CUCME,RecName: Full=Glyceraldehyde-3-phosphate dehydrogenase {ECO:0000256|RuleBase:RU361160}; EC=1.2.1.- {ECO:0000256|RuleBase:RU361160};
Cla005510	-1.25	0	0	0	GO:0005634,nucleus; GO:0046872,metal ion binding; GO:0016740,transferase activity; GO:0006952,defense response; GO:0043161,proteasome-mediated ubiquitin-dependent protein catabolic process; GO:0043067,regulation of programmed cell death	K19042: BOI; E3 ubiquitin-protein ligase BOI and related proteins [EC:2.3.2.27]	At3g12920	ref|XP_011659033.1|	BRG3_ARATH,RecName: Full=Probable BOI-related E3 ubiquitin-protein ligase 3; EC=2.3.2.27 {ECO:0000250|UniProtKB:Q9FHE4}; AltName: Full=RING-type E3 ubiquitin transferase BRG3 {ECO:0000305};	A0A1S3BHA8_CUCME,SubName: Full=probable BOI-related E3 ubiquitin-protein ligase 3 {ECO:0000313|RefSeq:XP_008447126.1};
Cla005511	0	2.116	0	0	--	--	At2g32210	ref|XP_011659032.1|	--	A0A0A0K5N8_CUCSA,SubName: Full=Uncharacterized protein {ECO:0000313|EMBL:KGN44264.1};
Cla005563	-1.34	0	0	0	--	--	--	ref|XP_008465748.1|	--	A0A1S3CPJ3_CUCME,SubName: Full=uncharacterized protein LOC103503357 {ECO:0000313|RefSeq:XP_008465748.1};
Cla005605	0	0	0	-1.076	--	--	--	--	--	--
Cla005614	0	1.674	0	0	GO:0005634,nucleus; GO:0003700,DNA binding transcription factor activity; GO:0043565,sequence-specific DNA binding; GO:0006952,defense response; GO:0009873,ethylene-activated signaling pathway; GO:0010200,response to chitin; GO:0009409,response to cold; GO:0006351,transcription, DNA-templated	K09286: EREBP; EREBP-like factor	At5g47230	ref|XP_008448805.1|	EF102_ARATH,RecName: Full=Ethylene-responsive transcription factor 5; Short=AtERF5; AltName: Full=Ethylene-responsive element-binding factor 5; Short=EREBP-5;	A0A1S3BL69_CUCME,SubName: Full=ethylene-responsive transcription factor 5 {ECO:0000313|RefSeq:XP_008448805.1};
Cla005623	1.279	0	0	0	GO:0005634,nucleus; GO:0003677,DNA binding; GO:0003700,DNA binding transcription factor activity; GO:0009873,ethylene-activated signaling pathway; GO:0006351,transcription, DNA-templated	--	At4g16750	ref|XP_008448820.1|	ERF39_ARATH,RecName: Full=Ethylene-responsive transcription factor ERF039;	A0A1S3BK05_CUCME,SubName: Full=ethylene-responsive transcription factor ERF039 {ECO:0000313|RefSeq:XP_008448820.1};
Cla005641	-1.059	0	0	0	GO:0016021,integral component of membrane; GO:0046872,metal ion binding; GO:0016757,transferase activity, transferring glycosyl groups; GO:0006486,protein glycosylation	--	At2g35710	gb|KGN55865.1|	GUX8_ARATH,RecName: Full=Putative glucuronosyltransferase PGSIP8; EC=2.4.1.-; AltName: Full=Glycogenin-like protein 8; AltName: Full=Plant glycogenin-like starch initiation protein 8;	A0A0A0L1J7_CUCSA,SubName: Full=Uncharacterized protein {ECO:0000313|EMBL:KGN55865.1};
Cla005644	-1.101	0	0	0	GO:0000139,Golgi membrane; GO:0005886,plasma membrane; GO:0015031,protein transport	--	At4g36490	ref|XP_016900587.1|	SFH12_ARATH,RecName: Full=Phosphatidylinositol/phosphatidylcholine transfer protein SFH12; AltName: Full=Protein SEC FOURTEEN HOMOLOGS 12; Short=AtSFH12;	A0A1S4DX84_CUCME,SubName: Full=phosphatidylinositol/phosphatidylcholine transfer protein SFH11 isoform X3 {ECO:0000313|RefSeq:XP_016900587.1};
Cla005760	-1.821	0	0	0	--	--	--	--	--	--
Cla005769	0	1.278	0	0	GO:0005886,plasma membrane; GO:0005544,calcium-dependent phospholipid binding; GO:0006952,defense response; GO:0060548,negative regulation of cell death; GO:0090332,stomatal closure	--	At1g08860	ref|XP_008450469.1|	BON3_ARATH,RecName: Full=Protein BONZAI 3;	A0A1S4E2I1_CUCME,SubName: Full=protein BONZAI 3 {ECO:0000313|RefSeq:XP_008450469.1, ECO:0000313|RefSeq:XP_008450473.1, ECO:0000313|RefSeq:XP_008450478.1};
Cla005814	0	0	0	-1.066	GO:0005576,extracellular region; GO:0005773,vacuole; GO:0003993,acid phosphatase activity; GO:0046872,metal ion binding	--	At1g14700	ref|XP_011655443.1|	PPA3_ARATH,RecName: Full=Purple acid phosphatase 3; EC=3.1.3.2; Flags: Precursor;	A0A0A0KP97_CUCSA,RecName: Full=Purple acid phosphatase {ECO:0000256|PIRNR:PIRNR000898}; EC=3.1.3.2 {ECO:0000256|PIRNR:PIRNR000898};
Cla005879	0	1.801	0	-1.246	--	--	--	gb|KGN49809.1|	--	A0A0A0KLQ9_CUCSA,SubName: Full=Uncharacterized protein {ECO:0000313|EMBL:KGN49809.1};
Cla005880	0	1.415	0	-1.128	GO:0005634,nucleus; GO:0003677,DNA binding; GO:0003700,DNA binding transcription factor activity; GO:0006351,transcription, DNA-templated	--	At1g13600	ref|XP_016898848.1|	BZP43_ARATH,RecName: Full=Basic leucine zipper 43 {ECO:0000303|PubMed:11906833}; Short=AtbZIP43 {ECO:0000303|PubMed:11906833}; Short=bZIP protein 43 {ECO:0000303|PubMed:11906833};	A0A1S4DS86_CUCME,SubName: Full=basic leucine zipper 43 {ECO:0000313|RefSeq:XP_016898848.1, ECO:0000313|RefSeq:XP_016898849.1};
Cla005905	0	0	-2.966	0	GO:0005794,Golgi apparatus; GO:0016021,integral component of membrane; GO:0016413,O-acetyltransferase activity; GO:0071554,cell wall organization or biogenesis	--	At1g29050	ref|XP_011656226.1|	TBL38_ARATH,RecName: Full=Protein trichome birefringence-like 38;	A0A1S3AV77_CUCME,SubName: Full=protein trichome birefringence-like 38 {ECO:0000313|RefSeq:XP_008437676.1};
Cla005970	-1.05	0	0	0	GO:0005634,nucleus; GO:0003677,DNA binding; GO:0003700,DNA binding transcription factor activity; GO:0009734,auxin-activated signaling pathway; GO:0048527,lateral root development; GO:0010072,primary shoot apical meristem specification; GO:0006351,transcription, DNA-templated	--	At1g56010	ref|XP_004152054.1|	NAC22_ARATH,RecName: Full=NAC domain-containing protein 21/22; Short=ANAC021/ANAC022;	A0A0A0LB56_CUCSA,SubName: Full=Uncharacterized protein {ECO:0000313|EMBL:KGN57897.1};
Cla005980	1.209	0	-1.584	-1.974	GO:0042735,protein body; GO:0045735,nutrient reservoir activity; GO:0051259,protein complex oligomerization	--	At1g03890	ref|XP_008447427.1|	11S2_SESIN,RecName: Full=11S globulin seed storage protein 2; AltName: Full=11S globulin seed storage protein II; AltName: Full=Alpha-globulin; Contains: RecName: Full=11S globulin seed storage protein 2 acidic chain; AltName: Full=11S globulin seed storage protein II acidic chain; Contains: RecName: Full=11S globulin seed storage protein 2 basic chain; AltName: Full=11S globulin seed storage pro…	A0A1S3BHE4_CUCME,SubName: Full=11S globulin seed storage protein 2-like {ECO:0000313|RefSeq:XP_008447427.1};
Cla006008	0	0	-1.101	0	GO:0004867,serine-type endopeptidase inhibitor activity; GO:0009611,response to wounding	--	At2g38870	ref|XP_006495465.1|	BGIA_MOMCH,RecName: Full=Glu S.griseus protease inhibitor; AltName: Full=BGIA;	A0A2H5N3H1_CITUN,SubName: Full=Uncharacterized protein {ECO:0000313|EMBL:GAY34487.1};
Cla006023	0	0	0	-1.573	--	--	--	--	--	--
Cla006034	-1.064	0	0	0	--	K15503: ANKRD44; serine/threonine-protein phosphatase 6 regulatory ankyrin repeat subunit B	At3g18670	ref|XP_016900773.1|	--	A0A1S4DXS0_CUCME,SubName: Full=uncharacterized protein LOC103491271 isoform X2 {ECO:0000313|RefSeq:XP_016900773.1};
Cla006035	-1.495	0	0	0	--	K15502: ANKRD28; serine/threonine-protein phosphatase 6 regulatory ankyrin repeat subunit A	--	gb|EYU40899.1|	--	A0A022RLJ2_ERYGU,SubName: Full=Uncharacterized protein {ECO:0000313|EMBL:EYU40899.1};
Cla006036	-1.7	0	0	0	--	K15502: ANKRD28; serine/threonine-protein phosphatase 6 regulatory ankyrin repeat subunit A	At5g04730	gb|EYU40899.1|	--	A0A022RLJ2_ERYGU,SubName: Full=Uncharacterized protein {ECO:0000313|EMBL:EYU40899.1};
Cla006048	0	0	0	-1.116	GO:0009507,chloroplast; GO:0009905,ent-copalyl diphosphate synthase activity; GO:0000287,magnesium ion binding; GO:0010333,terpene synthase activity; GO:0009686,gibberellin biosynthetic process	K04120: E5.5.1.13; ent-copalyl diphosphate synthase [EC:5.5.1.13]	At4g02780	ref|XP_008449932.2|	KSA_PEA,RecName: Full=Ent-copalyl diphosphate synthase, chloroplastic; Short=Ent-CDP synthase; EC=5.5.1.13; AltName: Full=Ent-copalyl diphosphate synthase; AltName: Full=Ent-kaurene synthase A; Short=KSA; Flags: Precursor;	A0A1S3BN50_CUCME,SubName: Full=ent-copalyl diphosphate synthase, chloroplastic {ECO:0000313|RefSeq:XP_008449932.2};
Cla006064	0	0	-1.459	-1.238	GO:0016021,integral component of membrane; GO:0009705,plant-type vacuole membrane; GO:0015140,malate transmembrane transporter activity	--	At5g46600	ref|XP_008449459.1|	ALMTD_ARATH,RecName: Full=Aluminum-activated malate transporter 13; Short=AtALMT13;	A0A1S3BM29_CUCME,SubName: Full=aluminum-activated malate transporter 12-like {ECO:0000313|RefSeq:XP_008449459.1};
Cla006070	0	2.035	0	0	--	--	--	gb|KGN47879.1|	--	A0A0A0KG94_CUCSA,SubName: Full=Uncharacterized protein {ECO:0000313|EMBL:KGN47879.1};
Cla006079	-1.19	0	0	0	GO:0005634,nucleus; GO:0009738,abscisic acid-activated signaling pathway; GO:0010029,regulation of seed germination; GO:0009737,response to abscisic acid; GO:0006970,response to osmotic stress; GO:0009651,response to salt stress; GO:0009414,response to water deprivation; GO:0010228,vegetative to reproductive phase transition of meristem	--	At3g63060	ref|XP_004140217.1|	EDL3_ARATH,RecName: Full=EID1-like F-box protein 3;	A0A0A0KHK8_CUCSA,SubName: Full=Uncharacterized protein {ECO:0000313|EMBL:KGN47872.1};
Cla006081	0	0	-1.19	0	GO:0016021,integral component of membrane	K16302: CNNM; metal transporter CNNM	At1g03270	ref|XP_023553644.1|	Y1327_ARATH,RecName: Full=Putative DUF21 domain-containing protein At1g03270; AltName: Full=CBS domain-containing protein CBSDUF4;	W9QKK0_9ROSA,SubName: Full=Putative DUF21 domain-containing protein {ECO:0000313|EMBL:EXB39344.1};
Cla006143	-1.8	0	0	0	GO:0016021,integral component of membrane	K16302: CNNM; metal transporter CNNM	At5g52790	gb|KGN57417.1|	Y5279_ARATH,RecName: Full=DUF21 domain-containing protein At5g52790; AltName: Full=CBS domain-containing protein CBSDUF5;	A0A0A0L9X3_CUCSA,SubName: Full=Uncharacterized protein {ECO:0000313|EMBL:KGN57417.1};
Cla006144	-1.007	0	0	0	GO:0009507,chloroplast; GO:0009535,chloroplast thylakoid membrane; GO:0016021,integral component of membrane	--	At5g52780	ref|XP_008439311.1|	Y5278_ARATH,RecName: Full=Uncharacterized protein PAM68-like;	A0A1S3AZ57_CUCME,SubName: Full=uncharacterized protein PAM68-like {ECO:0000313|RefSeq:XP_008439311.1};
Cla006145	-1.483	0	0	0	--	--	At5g07330	ref|XP_008439275.1|	--	A0A1S3AZ27_CUCME,SubName: Full=uncharacterized protein LOC103484107 {ECO:0000313|RefSeq:XP_008439275.1};
Cla006146	-1.746	0	0	0	GO:0005634,nucleus; GO:0003677,DNA binding; GO:0003700,DNA binding transcription factor activity; GO:0042752,regulation of circadian rhythm; GO:0009737,response to abscisic acid; GO:0046686,response to cadmium ion; GO:0009723,response to ethylene; GO:0009739,response to gibberellin; GO:0009753,response to jasmonic acid; GO:0009751,response to salicylic acid; GO:0009651,response to salt stress; GO…	--	At5g52660	ref|XP_008439279.1|	RVE6_ARATH,RecName: Full=Protein REVEILLE 6;	A0A1S3AZ30_CUCME,SubName: Full=protein REVEILLE 6-like isoform X4 {ECO:0000313|RefSeq:XP_008439279.1};
Cla006175	0	0	0	-2.722	--	--	At5g52390	ref|XP_008439231.1|	--	A0A1S3AYB8_CUCME,SubName: Full=uncharacterized protein LOC103484081 {ECO:0000313|RefSeq:XP_008439231.1};
Cla006182	-1.066	0	0	0	GO:0005783,endoplasmic reticulum; GO:0005789,endoplasmic reticulum membrane; GO:0005794,Golgi apparatus; GO:0000139,Golgi membrane; GO:0016021,integral component of membrane; GO:0005886,plasma membrane; GO:0031201,SNARE complex; GO:0005484,SNAP receptor activity; GO:0000149,SNARE binding; GO:0006887,exocytosis; GO:0015031,protein transport; GO:0006906,vesicle fusion	K08517: SEC22; vesicle transport protein SEC22	At5g52270	ref|XP_008439222.1|	SEC22_ARATH,RecName: Full=25.3 kDa vesicle transport protein; Short=AtSEC22;	A0A1S3AYX3_CUCME,SubName: Full=25.3 kDa vesicle transport protein isoform X1 {ECO:0000313|RefSeq:XP_008439222.1};
Cla006196	-1.821	0	0	0	GO:0005737,cytoplasm	--	At5g62040	ref|XP_022141189.1|	CET1_TOBAC,RecName: Full=CEN-like protein 1;	A0A1S3AXT2_CUCME,SubName: Full=CEN-like protein 1 {ECO:0000313|RefSeq:XP_008439188.1};
Cla006197	0	0	0	-4.182	GO:0005634,nucleus; GO:0003700,DNA binding transcription factor activity; GO:0008289,lipid binding; GO:0043565,sequence-specific DNA binding; GO:0043481,anthocyanin accumulation in tissues in response to UV light; GO:0042335,cuticle development; GO:0009827,plant-type cell wall modification; GO:0048364,root development; GO:0048765,root hair cell differentiation; GO:0006351,transcription, DNA-templ…	K09338: HD-ZIP; homeobox-leucine zipper protein	At3g61150	ref|XP_011651140.1|	ANL2_ARATH,RecName: Full=Homeobox-leucine zipper protein ANTHOCYANINLESS 2; AltName: Full=HD-ZIP protein ANL2; AltName: Full=Homeodomain protein AHDP; AltName: Full=Homeodomain transcription factor ANL2;	A0A0A0L5U5_CUCSA,SubName: Full=Uncharacterized protein {ECO:0000313|EMBL:KGN57355.1};
Cla006209	0	2.998	0	0	GO:0016021,integral component of membrane; GO:0015297,antiporter activity; GO:0015238,drug transmembrane transporter activity; GO:0006855,drug transmembrane transport	K03327: TC.MATE, SLC47A, norM, mdtK, dinF; multidrug resistance protein, MATE family	At4g23030	ref|XP_008439170.1|	DTX49_ARATH,RecName: Full=Protein DETOXIFICATION 49 {ECO:0000303|PubMed:11739388}; Short=AtDTX49 {ECO:0000303|PubMed:11739388}; AltName: Full=Multidrug and toxic compound extrusion protein 49 {ECO:0000305}; Short=MATE protein 49 {ECO:0000305}; AltName: Full=Protein NOVEL ION CARRIER 1 {ECO:0000303|Ref.1}; Short=Protein NIC1 {ECO:0000303|Ref.1};	A0A1S3AYS6_CUCME,RecName: Full=Protein DETOXIFICATION {ECO:0000256|RuleBase:RU004914}; AltName: Full=Multidrug and toxic compound extrusion protein {ECO:0000256|RuleBase:RU004914};
Cla006220	-1.969	0	0	0	GO:0005576,extracellular region; GO:0009505,plant-type cell wall; GO:0009506,plasmodesma; GO:0020037,heme binding; GO:0046872,metal ion binding; GO:0004601,peroxidase activity; GO:0042744,hydrogen peroxide catabolic process; GO:0009664,plant-type cell wall organization; GO:0006979,response to oxidative stress	K00430: E1.11.1.7; peroxidase [EC:1.11.1.7]	At5g51890	ref|XP_004150302.1|	PER66_ARATH,RecName: Full=Peroxidase 66; Short=Atperox P66; EC=1.11.1.7; AltName: Full=ATP27a; Flags: Precursor;	A0A0A0L6C8_CUCSA,RecName: Full=Peroxidase {ECO:0000256|RuleBase:RU362060, ECO:0000256|SAAS:SAAS00709852}; EC=1.11.1.7 {ECO:0000256|RuleBase:RU362060, ECO:0000256|SAAS:SAAS00709852};
Cla006233	-2.508	0	0	0	GO:0046872,metal ion binding; GO:0004722,protein serine/threonine phosphatase activity; GO:0009737,response to abscisic acid	K14497: PP2C; protein phosphatase 2C [EC:3.1.3.16]	At5g51760	ref|XP_008439132.1|	P2C75_ARATH,RecName: Full=Probable protein phosphatase 2C 75; Short=AtPP2C75; EC=3.1.3.16; AltName: Full=Protein ABA-HYPERSENSITIVE GERMINATION 1; AltName: Full=Protein phosphatase 2C AHG1; Short=PP2C AHG1;	A0A1S3AYN8_CUCME,SubName: Full=probable protein phosphatase 2C 75 isoform X1 {ECO:0000313|RefSeq:XP_008439132.1};
Cla006248	-1.32	0	0	0	--	--	At5g51670	ref|XP_008439117.1|	--	A0A1S3AYM2_CUCME,SubName: Full=uncharacterized protein LOC103484007 {ECO:0000313|RefSeq:XP_008439117.1};
Cla006269	1.104	0	0	0	GO:0031225,anchored component of membrane; GO:0046658,anchored component of plasma membrane; GO:0005886,plasma membrane; GO:0009506,plasmodesma; GO:0005507,copper ion binding; GO:0016722,oxidoreductase activity, oxidizing metal ions	K19791: FET3_5; iron transport multicopper oxidase	At5g51480	ref|XP_008439091.1|	SKS1_ARATH,RecName: Full=Monocopper oxidase-like protein SKS1; Flags: Precursor;	A0A1S3AXI5_CUCME,SubName: Full=monocopper oxidase-like protein SKS1 {ECO:0000313|RefSeq:XP_008439091.1};
Cla006270	0	1.305	0	-1.247	GO:0004805,trehalose-phosphatase activity; GO:0005992,trehalose biosynthetic process	K01087: otsB; trehalose 6-phosphate phosphatase [EC:3.1.3.12]	At5g51460	ref|XP_023551916.1|	TPPA_ARATH,RecName: Full=Trehalose-phosphate phosphatase A; Short=AtTPPA; EC=3.1.3.12; AltName: Full=Trehalose 6-phosphate phosphatase;	A0A1S3AYK7_CUCME,RecName: Full=Trehalose 6-phosphate phosphatase {ECO:0000256|RuleBase:RU361117}; EC=3.1.3.12 {ECO:0000256|RuleBase:RU361117};
Cla006310	-1.319	0	0	0	GO:0009507,chloroplast; GO:0047714,galactolipase activity; GO:0008970,phosphatidylcholine 1-acylhydrolase activity; GO:0004806,triglyceride lipase activity; GO:0016042,lipid catabolic process	--	At1g51440	ref|XP_008450415.1|	PLA17_ARATH,RecName: Full=Phospholipase A1-Igamma3, chloroplastic; EC=3.1.1.-; Flags: Precursor;	A0A1S3BNJ8_CUCME,SubName: Full=phospholipase A1-Igamma3, chloroplastic {ECO:0000313|RefSeq:XP_008450415.1};
Cla006334	0	0	0	-1.269	GO:0048046,apoplast; GO:0009507,chloroplast; GO:0009570,chloroplast stroma; GO:0016020,membrane; GO:0005777,peroxisome; GO:0005886,plasma membrane; GO:0008453,alanine-glyoxylate transaminase activity; GO:0050281,serine-glyoxylate transaminase activity; GO:0004760,serine-pyruvate transaminase activity; GO:0019265,glycine biosynthetic process, by transamination of glyoxylate; GO:0009853,photorespir…	K00830: AGXT; alanine-glyoxylate transaminase / serine-glyoxylate transaminase / serine-pyruvate transaminase [EC:2.6.1.44 2.6.1.45 2.6.1.51]	At2g13360	gb|AAL47679.1|	SGAT_ARATH,RecName: Full=Serine--glyoxylate aminotransferase; EC=2.6.1.45 {ECO:0000269|PubMed:18235971, ECO:0000269|PubMed:23098902}; AltName: Full=Alanine--glyoxylate aminotransferase; Short=AGT; EC=2.6.1.44 {ECO:0000269|PubMed:18235971, ECO:0000269|PubMed:23098902}; AltName: Full=Asparagine aminotransferase; EC=2.6.1.-; AltName: Full=Serine--pyruvate aminotransferase; EC=2.6.1.51 {ECO:0000269|P…	Q8VYW9_CUCME,SubName: Full=Aminotransferase 1 {ECO:0000313|EMBL:AAL47679.1};
Cla006356	3.897	0	0	0	GO:0005576,extracellular region; GO:0009505,plant-type cell wall; GO:0009506,plasmodesma; GO:0020037,heme binding; GO:0046872,metal ion binding; GO:0004601,peroxidase activity; GO:0042744,hydrogen peroxide catabolic process; GO:0009664,plant-type cell wall organization; GO:0006979,response to oxidative stress	K00430: E1.11.1.7; peroxidase [EC:1.11.1.7]	At4g25980	gb|APO14268.1|	PER43_ARATH,RecName: Full=Peroxidase 43; Short=Atperox P43; EC=1.11.1.7; Flags: Precursor;	A0A1L5JHU5_LUFAE,RecName: Full=Peroxidase {ECO:0000256|RuleBase:RU362060, ECO:0000256|SAAS:SAAS00709852}; EC=1.11.1.7 {ECO:0000256|RuleBase:RU362060, ECO:0000256|SAAS:SAAS00709852};
Cla006361	-2.757	0	0	0	GO:0035251,UDP-glucosyltransferase activity; GO:0008152,metabolic process	K21374: UGT85A; 7-deoxyloganetin glucosyltransferase [EC:2.4.1.324]	At1g22340	ref|XP_011658777.1|	UGT2_GARJA,RecName: Full=7-deoxyloganetin glucosyltransferase; EC=2.4.1.324; AltName: Full=Genipin glucosyltransferase; AltName: Full=UDP-glucose glucosyltransferase 2; Short=GjUGT2; AltName: Full=UDP-glycosyltransferase 85A24;	A0A0A0K1Z5_CUCSA,SubName: Full=Uncharacterized protein {ECO:0000313|EMBL:KGN43695.1};
Cla006442	1.383	0	0	0	GO:0016021,integral component of membrane; GO:0022857,transmembrane transporter activity	K14611: SLC23A1_2, SVCT1_2; solute carrier family 23 (nucleobase transporter), member 1/2	At1g49960	ref|XP_008454409.1|	NAT4_ARATH,RecName: Full=Nucleobase-ascorbate transporter 4; Short=AtNAT4; Short=AtPER;	A0A1S3BZS0_CUCME,SubName: Full=nucleobase-ascorbate transporter 4 {ECO:0000313|RefSeq:XP_008454409.1};
Cla006449	2.29	0	0	0	--	--	At4g33800	ref|XP_008454413.1|	--	A0A1S3BZC0_CUCME,SubName: Full=uncharacterized protein LOC103494824 isoform X4 {ECO:0000313|RefSeq:XP_008454413.1};
Cla006477	-1.397	0	0	0	--	--	--	ref|XP_022922669.1|	--	A0A1S3BYR5_CUCME,SubName: Full=MADS-box transcription factor 23 isoform X2 {ECO:0000313|RefSeq:XP_008454453.1};
Cla006478	-1.482	0	0	0	--	--	--	--	--	--
Cla006508	1.591	0	0	0	GO:0005739,mitochondrion; GO:0005777,peroxisome; GO:0030151,molybdenum ion binding; GO:0008482,sulfite oxidase activity; GO:0015994,chlorophyll metabolic process; GO:0042128,nitrate assimilation; GO:0010477,response to sulfur dioxide; GO:0006790,sulfur compound metabolic process	K00387: SUOX; sulfite oxidase [EC:1.8.3.1]	At3g01910	ref|XP_008441341.1|	SUOX_ARATH,RecName: Full=Sulfite oxidase; EC=1.8.3.1; AltName: Full=Moco-containing protein AtMCP; Short=At-SO; Short=AtSOX;	A0A1S3B3V3_CUCME,SubName: Full=sulfite oxidase isoform X2 {ECO:0000313|RefSeq:XP_008441341.1};
Cla006510	-1.346	0	0	0	GO:0034707,chloride channel complex; GO:0009705,plant-type vacuole membrane; GO:0009671,nitrate:proton symporter activity; GO:0005247,voltage-gated chloride channel activity; GO:1902476,chloride transmembrane transport; GO:0034765,regulation of ion transmembrane transport	K05016: CLCN7; chloride channel 7	At3g27170	ref|NP_001267676.1|	CLCB_ARATH,RecName: Full=Chloride channel protein CLC-b; Short=AtCLC-b; AltName: Full=CBS domain-containing protein CBSCLC7;	I1Z8C8_CUCSA,RecName: Full=Chloride channel protein {ECO:0000256|RuleBase:RU361221};
Cla006513	0	0	0	1.296	GO:0005886,plasma membrane	--	At3g01860	ref|XP_004138611.1|	Y3721_ARATH,RecName: Full=Uncharacterized protein At3g27210;	A0A0A0LT18_CUCSA,SubName: Full=Uncharacterized protein {ECO:0000313|EMBL:KGN63176.1};
Cla006521	-1.812	0	0	0	--	--	At5g14230	ref|XP_008441362.1|	--	A0A1S3B403_CUCME,SubName: Full=ankyrin-3 {ECO:0000313|RefSeq:XP_008441362.1};
Cla006527	6.478	0	0	0	GO:0016021,integral component of membrane; GO:0005886,plasma membrane; GO:0015171,amino acid transmembrane transporter activity; GO:0015293,symporter activity; GO:0043090,amino acid import; GO:0080167,response to karrikin	K15015: SLC32A, VGAT; solute carrier family 32 (vesicular inhibitory amino acid transporter)	At5g40780	ref|XP_008441370.1|	LHT1_ARATH,RecName: Full=Lysine histidine transporter 1;	A0A1S3B392_CUCME,SubName: Full=lysine histidine transporter 1 {ECO:0000313|RefSeq:XP_008441370.1};
Cla006542	-1.774	0	0	0	GO:0009570,chloroplast stroma; GO:0005524,ATP binding	--	At2g39730	ref|XP_022955346.1|	RCA1_LARTR,RecName: Full=Ribulose bisphosphate carboxylase/oxygenase activase 1, chloroplastic; Short=RA 1; Short=RuBisCO activase 1; AltName: Full=RuBisCO activase alpha form; Flags: Precursor;	A0A0A0KBG2_CUCSA,SubName: Full=Uncharacterized protein {ECO:0000313|EMBL:KGN45737.1};
Cla006545	-1.132	0	0	0	--	--	At3g11420	ref|XP_008441391.1|	--	A0A1S3B3B2_CUCME,SubName: Full=uncharacterized protein LOC103485521 {ECO:0000313|RefSeq:XP_008441391.1};
Cla006549	-1.321	0	0	0	GO:0016021,integral component of membrane; GO:0005886,plasma membrane; GO:0005524,ATP binding; GO:0030247,polysaccharide binding; GO:0004674,protein serine/threonine kinase activity; GO:0007166,cell surface receptor signaling pathway	K04733: IRAK4; interleukin-1 receptor-associated kinase 4 [EC:2.7.11.1]	At5g02070	ref|XP_008441394.2|	WAKLQ_ARATH,RecName: Full=Wall-associated receptor kinase-like 20; EC=2.7.11.-; Flags: Precursor;	A0A1S3B2W0_CUCME,SubName: Full=wall-associated receptor kinase-like 20 {ECO:0000313|RefSeq:XP_008441394.2};
Cla006565	1.769	-1.339	-1.331	0	GO:0005737,cytoplasm	K13993: HSP20; HSP20 family protein	At3g46230	ref|XP_023550896.1|	HSP11_SOYBN,RecName: Full=17.3 kDa class I heat shock protein; AltName: Full=HSP 17.3;	A0A0A0KD99_CUCSA,SubName: Full=Uncharacterized protein {ECO:0000313|EMBL:KGN45761.1};
Cla006580	-1.269	0	0	0	GO:0005737,cytoplasm; GO:0020037,heme binding; GO:0046872,metal ion binding; GO:0009816,defense response to bacterium, incompatible interaction; GO:0006979,response to oxidative stress; GO:0009751,response to salicylic acid; GO:0019441,tryptophan catabolic process to kynurenine	--	At2g40000	ref|XP_008441443.1|	HSPR2_ARATH,RecName: Full=Nematode resistance protein-like HSPRO2; AltName: Full=AKINbetagamma-interacting protein 2; AltName: Full=Ortholog of sugar beet HS1 PRO-1 protein 2; AltName: Full=Protein Hs1pro-2;	A0A1S3B443_CUCME,SubName: Full=nematode resistance protein-like HSPRO2 {ECO:0000313|RefSeq:XP_008441443.1};
Cla006605	-1.492	0	0	0	GO:0005634,nucleus; GO:0003700,DNA binding transcription factor activity; GO:0043565,sequence-specific DNA binding; GO:0044212,transcription regulatory region DNA binding; GO:0009738,abscisic acid-activated signaling pathway; GO:0010286,heat acclimation; GO:0045893,positive regulation of transcription, DNA-templated; GO:0009737,response to abscisic acid; GO:0006351,transcription, DNA-templated	--	--	ref|XP_011656418.1|	DRE2C_ARATH,RecName: Full=Dehydration-responsive element-binding protein 2C; Short=Protein DREB2C;	A0A1S3B4B1_CUCME,SubName: Full=dehydration-responsive element-binding protein 2C isoform X1 {ECO:0000313|RefSeq:XP_008441482.1};
Cla006620	2.75	0	0	0	--	--	At3g05550	ref|XP_004138401.1|	--	A0A0A0K7T4_CUCSA,SubName: Full=Uncharacterized protein {ECO:0000313|EMBL:KGN45820.1};
Cla006634	0	0	0	-4.125	GO:0016847,1-aminocyclopropane-1-carboxylate synthase activity; GO:0030170,pyridoxal phosphate binding; GO:0009693,ethylene biosynthetic process; GO:0009835,fruit ripening	K20772: ACS1_2_6; 1-aminocyclopropane-1-carboxylate synthase 1/2/6 [EC:4.4.1.14]	At3g61510	gb|ABO76787.1|	1A12_CUCPE,RecName: Full=1-aminocyclopropane-1-carboxylate synthase 2; Short=ACC synthase 2; EC=4.4.1.14; AltName: Full=S-adenosyl-L-methionine methylthioadenosine-lyase;	B2WR81_9ROSI,SubName: Full=1-aminocyclopropane-1-carboxylate synthase {ECO:0000313|EMBL:ABO76787.1}; EC=4.4.1.14 {ECO:0000313|EMBL:ABO76787.1};
Cla006644	1.024	0	0	0	--	--	At4g01140	ref|XP_011656366.1|	--	A0A0A0KBD8_CUCSA,SubName: Full=Uncharacterized protein {ECO:0000313|EMBL:KGN45707.1};
Cla006646	0	0	0	-2.306	GO:0005634,nucleus; GO:0009734,auxin-activated signaling pathway; GO:0007275,multicellular organism development; GO:1900057,positive regulation of leaf senescence; GO:0040008,regulation of growth; GO:0010029,regulation of seed germination	K14488: SAUR; SAUR family protein	At3g60690	ref|XP_008458152.1|	SAU36_ARATH,RecName: Full=Auxin-responsive protein SAUR36 {ECO:0000305}; AltName: Full=Protein RESPONSE TO AUXINS AND GIBBERELLINS 1 {ECO:0000303|PubMed:23503980}; AltName: Full=Protein SENESCENCE-ASSOCIATED GENE 201 {ECO:0000305}; AltName: Full=Protein SMALL AUXIN UP RNA 36 {ECO:0000303|PubMed:12036261};	A0A1S3C755_CUCME,SubName: Full=auxin-responsive protein SAUR36-like {ECO:0000313|RefSeq:XP_008458152.1};
Cla006647	0	0	0	-3.779	GO:0009507,chloroplast; GO:0016758,transferase activity, transferring hexosyl groups; GO:0008152,metabolic process	K21371: UGT75L6, UGTCs2; crocetin glucosyltransferase [EC:2.4.1.271]	At1g05560	ref|XP_008458151.1|	UGT1_GARJA,RecName: Full=Crocetin glucosyltransferase, chloroplastic; EC=2.4.1.271; AltName: Full=UDP-glucose glucosyltransferase 1; Short=GjUGT1; AltName: Full=UDP-glycosyltransferase 75L6; Flags: Precursor;	A0A1S3C7B0_CUCME,RecName: Full=Glycosyltransferase {ECO:0000256|RuleBase:RU362057}; EC=2.4.1.- {ECO:0000256|RuleBase:RU362057};
Cla006649	0	0	0	-1.117	GO:0008430,selenium binding; GO:0010197,polar nucleus fusion	K17285: SELENBP1; selenium-binding protein 1	At4g14040	ref|XP_008458148.1|	SEBP2_ARATH,RecName: Full=Selenium-binding protein 2; AltName: Full=Protein EMBRYO SAC DEVELOPMENT ARREST 38;	A0A1S3C7S4_CUCME,SubName: Full=selenium-binding protein 2 {ECO:0000313|RefSeq:XP_008458148.1};
Cla006653	0	0	0	-2.431	GO:0102816,UDP-D-glucose:delphinidin 3-O-glucosyl-5-O-caffeoylglucoside -O-beta-D-glucosyltransferase activity; GO:0009718,anthocyanin-containing compound biosynthetic process	--	At4g14090	ref|XP_023000277.1|	5GT2_PERFR,RecName: Full=Anthocyanidin 3-O-glucoside 5-O-glucosyltransferase 2; EC=2.4.1.298; AltName: Full=UDP-glucose:anthocyanin 5-O-glucosyltransferase 3R6; Short=p3R6; Flags: Precursor;	A0A1S3C8E8_CUCME,RecName: Full=Glycosyltransferase {ECO:0000256|RuleBase:RU362057}; EC=2.4.1.- {ECO:0000256|RuleBase:RU362057};
Cla006654	0	0	0	-1.905	GO:0009507,chloroplast; GO:0016758,transferase activity, transferring hexosyl groups; GO:0008152,metabolic process	K21371: UGT75L6, UGTCs2; crocetin glucosyltransferase [EC:2.4.1.271]	At1g05560	ref|XP_022964318.1|	UGT1_GARJA,RecName: Full=Crocetin glucosyltransferase, chloroplastic; EC=2.4.1.271; AltName: Full=UDP-glucose glucosyltransferase 1; Short=GjUGT1; AltName: Full=UDP-glycosyltransferase 75L6; Flags: Precursor;	A0A1S3C8E8_CUCME,RecName: Full=Glycosyltransferase {ECO:0000256|RuleBase:RU362057}; EC=2.4.1.- {ECO:0000256|RuleBase:RU362057};
Cla006655	-2.216	0	0	-5.856	GO:0009507,chloroplast; GO:0016758,transferase activity, transferring hexosyl groups; GO:0008152,metabolic process	K21371: UGT75L6, UGTCs2; crocetin glucosyltransferase [EC:2.4.1.271]	At4g14090	ref|XP_008458144.1|	UGT1_GARJA,RecName: Full=Crocetin glucosyltransferase, chloroplastic; EC=2.4.1.271; AltName: Full=UDP-glucose glucosyltransferase 1; Short=GjUGT1; AltName: Full=UDP-glycosyltransferase 75L6; Flags: Precursor;	A0A1S3C8E8_CUCME,RecName: Full=Glycosyltransferase {ECO:0000256|RuleBase:RU362057}; EC=2.4.1.- {ECO:0000256|RuleBase:RU362057};
Cla006686	0	0	0	-4.546	GO:0005783,endoplasmic reticulum; GO:0016036,cellular response to phosphate starvation; GO:0080040,positive regulation of cellular response to phosphate starvation	--	At2g45130	ref|XP_008459739.1|	SPX3_ARATH,RecName: Full=SPX domain-containing protein 3; AltName: Full=Protein SPX DOMAIN GENE 3; Short=AtSPX3;	A0A1S3CBC3_CUCME,SubName: Full=SPX domain-containing protein 3 {ECO:0000313|RefSeq:XP_008459739.1};
Cla006692	2.758	0	0	0	GO:0005737,cytoplasm; GO:0005634,nucleus; GO:0003677,DNA binding; GO:0003700,DNA binding transcription factor activity; GO:0046983,protein dimerization activity; GO:0010629,negative regulation of gene expression; GO:0006355,regulation of transcription, DNA-templated; GO:0006351,transcription, DNA-templated	K13422: MYC2; transcription factor MYC2	At4g00870	ref|XP_004140617.1|	BH014_ARATH,RecName: Full=Transcription factor bHLH14; AltName: Full=Basic helix-loop-helix protein 14; Short=AtbHLH14; Short=bHLH 14; AltName: Full=Transcription factor EN 33; AltName: Full=bHLH transcription factor bHLH014;	A0A0A0KFN7_CUCSA,SubName: Full=Uncharacterized protein {ECO:0000313|EMBL:KGN46541.1};
Cla006693	3.498	0	0	0	GO:0005737,cytoplasm; GO:0005634,nucleus; GO:0003677,DNA binding; GO:0003700,DNA binding transcription factor activity; GO:0046983,protein dimerization activity; GO:0010629,negative regulation of gene expression; GO:0006355,regulation of transcription, DNA-templated; GO:0006351,transcription, DNA-templated	K13422: MYC2; transcription factor MYC2	At4g00870	ref|XP_016902487.1|	BH014_ARATH,RecName: Full=Transcription factor bHLH14; AltName: Full=Basic helix-loop-helix protein 14; Short=AtbHLH14; Short=bHLH 14; AltName: Full=Transcription factor EN 33; AltName: Full=bHLH transcription factor bHLH014;	A0A1S4E2N5_CUCME,SubName: Full=transcription factor MYC2-like {ECO:0000313|RefSeq:XP_016902487.1};
Cla006698	0	0	0	5.58	--	--	--	gb|KGN46535.1|	--	A0A0A0KA10_CUCSA,SubName: Full=Uncharacterized protein {ECO:0000313|EMBL:KGN46535.1};
Cla006699	-1.224	0	0	0	GO:0005525,GTP binding	--	At1g33950	ref|XP_004140622.2|	IAN7_ARATH,RecName: Full=Immune-associated nucleotide-binding protein 7 {ECO:0000303|PubMed:17723251}; Short=AtIAN7 {ECO:0000303|PubMed:17723251}; AltName: Full=AIG1-like protein {ECO:0000305};	A0A0A0KA09_CUCSA,SubName: Full=Uncharacterized protein {ECO:0000313|EMBL:KGN46530.1};
Cla006701	-2.137	0	0	-1.944	GO:0005509,calcium ion binding; GO:0010091,trichome branching	K16465: CETN1; centrin-1	At2g46600	ref|XP_004140505.1|	KIC_ARATH,RecName: Full=Calcium-binding protein KIC; AltName: Full=KCBP-interacting calcium-binding protein;	A0A0A0KAP2_CUCSA,SubName: Full=Uncharacterized protein {ECO:0000313|EMBL:KGN46528.1};
Cla006705	1.616	0	0	0	GO:0005634,nucleus; GO:0003677,DNA binding; GO:0046872,metal ion binding; GO:0006355,regulation of transcription, DNA-templated; GO:0006351,transcription, DNA-templated	--	At3g61850	ref|XP_022960172.1|	DOF37_ARATH,RecName: Full=Dof zinc finger protein DOF3.7; Short=AtDOF3.7; AltName: Full=Dof affecting germination 1; AltName: Full=RolB domain B factor a; AltName: Full=Transcription factor BBFa; Short=AtBBFa;	E5GCN0_CUCME,SubName: Full=F-box family protein {ECO:0000313|EMBL:ADN34229.1};
Cla006736	1.114	0	0	0	GO:0016021,integral component of membrane; GO:0005886,plasma membrane; GO:0005524,ATP binding; GO:0030247,polysaccharide binding; GO:0004674,protein serine/threonine kinase activity; GO:0007166,cell surface receptor signaling pathway	--	At2g46850	ref|XP_008459811.1|	Y2685_ARATH,RecName: Full=Probably inactive receptor-like protein kinase At2g46850; Flags: Precursor;	A0A1S3CC95_CUCME,SubName: Full=probably inactive receptor-like protein kinase At2g46850 {ECO:0000313|RefSeq:XP_008459811.1};
Cla006740	-2.409	0	0	0	GO:0009507,chloroplast; GO:0009941,chloroplast envelope; GO:0030093,chloroplast photosystem I; GO:0009534,chloroplast thylakoid; GO:0009535,chloroplast thylakoid membrane; GO:0016021,integral component of membrane; GO:0009295,nucleoid; GO:0009508,plastid chromosome; GO:0009579,thylakoid; GO:0003677,DNA binding; GO:0019904,protein domain specific binding; GO:0009773,photosynthetic electron transpo…	--	At2g46820	ref|XP_008459821.1|	CUT1B_ARATH,RecName: Full=Protein CURVATURE THYLAKOID 1B, chloroplastic; AltName: Full=Photosystem I protein P; AltName: Full=Thylakoid membrane phosphoprotein 14 kDa; Flags: Precursor;	A0A1S3CCA4_CUCME,SubName: Full=protein CURVATURE THYLAKOID 1B, chloroplastic {ECO:0000313|RefSeq:XP_008459821.1};
Cla006764	1.378	0	0	0	GO:0016021,integral component of membrane; GO:0005524,ATP binding; GO:0004674,protein serine/threonine kinase activity	K04733: IRAK4; interleukin-1 receptor-associated kinase 4 [EC:2.7.11.1]	At5g67280	ref|XP_008462844.1|	Y4372_ARATH,RecName: Full=Probable LRR receptor-like serine/threonine-protein kinase At4g37250; EC=2.7.11.1; Flags: Precursor;	A0A1S3CHT3_CUCME,SubName: Full=probable LRR receptor-like serine/threonine-protein kinase At4g37250 {ECO:0000313|RefSeq:XP_008462844.1};
Cla006784	1.285	2.446	0	-1.997	GO:0016747,transferase activity, transferring acyl groups other than amino-acyl groups	K19861: BEBT, AMAT; benzyl alcohol O-benzoyltransferase [EC:2.3.1.196 2.3.1.232]	At5g17540	ref|NP_001315395.1|	BEBT_TOBAC,RecName: Full=Benzyl alcohol O-benzoyltransferase; EC=2.3.1.196; AltName: Full=Benzoyl coenzyme A:benzyl alcohol benzoyl transferase;	A0A1S3CHT9_CUCME,SubName: Full=benzyl alcohol O-benzoyltransferase-like {ECO:0000313|RefSeq:XP_008462816.1};
Cla006789	1.084	0	0	0	GO:0009941,chloroplast envelope; GO:0009706,chloroplast inner membrane; GO:0016021,integral component of membrane; GO:0005363,maltose transmembrane transporter activity; GO:0005975,carbohydrate metabolic process; GO:0000023,maltose metabolic process; GO:0009624,response to nematode; GO:0005983,starch catabolic process	--	At5g17520	ref|XP_004151852.1|	MEX1_ARATH,RecName: Full=Maltose excess protein 1, chloroplastic; AltName: Full=Root cap protein 1; Flags: Precursor;	A0A0A0LQS0_CUCSA,SubName: Full=Uncharacterized protein {ECO:0000313|EMBL:KGN63344.1};
Cla006814	-1.302	0	0	0	GO:0005829,cytosol; GO:0016491,oxidoreductase activity	--	At4g09670	ref|XP_022963640.1|	Y4967_ARATH,RecName: Full=Uncharacterized oxidoreductase At4g09670; EC=1.-.-.-;	A0A0A0KB74_CUCSA,SubName: Full=Uncharacterized protein {ECO:0000313|EMBL:KGN46089.1};
Cla006880	-1.573	0	0	0	GO:0005634,nucleus; GO:0003700,DNA binding transcription factor activity; GO:0008270,zinc ion binding; GO:0007623,circadian rhythm; GO:0048579,negative regulation of long-day photoperiodism, flowering; GO:0006355,regulation of transcription, DNA-templated	--	At3g07650	ref|XP_004139988.1|	COL9_ARATH,RecName: Full=Zinc finger protein CONSTANS-LIKE 9;	A0A0A0KCQ6_CUCSA,SubName: Full=Uncharacterized protein {ECO:0000313|EMBL:KGN46619.1};
Cla006906	1.023	0	0	0	GO:0005634,nucleus; GO:0043565,sequence-specific DNA binding; GO:1901002,positive regulation of response to salt stress; GO:1902584,positive regulation of response to water deprivation; GO:0045893,positive regulation of transcription, DNA-templated; GO:0006351,transcription, DNA-templated	--	At2g17040	ref|XP_011656937.1|	NAC22_ORYSJ,RecName: Full=NAC domain-containing protein 22 {ECO:0000303|PubMed:15029955}; Short=ONAC022 {ECO:0000303|PubMed:15029955};	A0A0A0KAG5_CUCSA,SubName: Full=Uncharacterized protein {ECO:0000313|EMBL:KGN46720.1};
Cla006913	0	1.149	0	0	GO:0005829,cytosol; GO:0005634,nucleus; GO:0016787,hydrolase activity; GO:0009691,cytokinin biosynthetic process	K22522: LOG; cytokinin riboside 5'-monophosphate phosphoribohydrolase [EC:3.2.2.-]	At5g06300	ref|XP_011656935.1|	LOG5_ARATH,RecName: Full=Cytokinin riboside 5'-monophosphate phosphoribohydrolase LOG5; EC=3.2.2.n1; AltName: Full=Protein LONELY GUY 5;	A0A0A0KB16_CUCSA,RecName: Full=Cytokinin riboside 5'-monophosphate phosphoribohydrolase {ECO:0000256|RuleBase:RU363015}; EC=3.2.2.n1 {ECO:0000256|RuleBase:RU363015};
Cla006947	1.31	0	0	0	GO:0016021,integral component of membrane; GO:0005886,plasma membrane; GO:0005524,ATP binding; GO:0004675,transmembrane receptor protein serine/threonine kinase activity; GO:0007166,cell surface receptor signaling pathway; GO:0006468,protein phosphorylation	--	At2g45590	ref|XP_008460138.1|	Y2559_ARATH,RecName: Full=Receptor-like serine/threonine-protein kinase At2g45590; EC=2.7.11.1;	A0A1S3CBY3_CUCME,SubName: Full=receptor-like serine/threonine-protein kinase At2g45590 {ECO:0000313|RefSeq:XP_008460138.1};
Cla006954	-1.835	0	0	0	GO:0005509,calcium ion binding	--	At1g05990	ref|XP_004153117.1|	CML7_ARATH,RecName: Full=Calmodulin-like protein 7;	A0A0A0K8Z4_CUCSA,SubName: Full=Uncharacterized protein {ECO:0000313|EMBL:KGN46235.1};
Cla006987	1.54	0	0	0	GO:0019901,protein kinase binding; GO:0007049,cell cycle; GO:0051301,cell division; GO:0000079,regulation of cyclin-dependent protein serine/threonine kinase activity	--	At2g44740	ref|XP_022958930.1|	CCU41_ARATH,RecName: Full=Cyclin-U4-1; Short=CycU4;1; AltName: Full=Cyclin-P4.1; Short=CycP4;1;	A0A0A0KER4_CUCSA,SubName: Full=Uncharacterized protein {ECO:0000313|EMBL:KGN46271.1};
Cla006998	1.761	0	0	0	GO:0005829,cytosol; GO:0005886,plasma membrane; GO:0046872,metal ion binding; GO:0050308,sugar-phosphatase activity	--	At2g38740	ref|XP_008460065.1|	SGGP_ARATH,RecName: Full=Haloacid dehalogenase-like hydrolase domain-containing protein Sgpp; EC=3.1.3.-; AltName: Full=Subclass I phosphosugar phosphatase; Short=AtSgpp;	A0A1S3CB79_CUCME,SubName: Full=haloacid dehalogenase-like hydrolase domain-containing protein Sgpp isoform X1 {ECO:0000313|RefSeq:XP_008460065.1};
Cla006999	2.463	0	0	0	--	--	At2g44600	ref|XP_004154141.1|	--	A0A0A0K942_CUCSA,SubName: Full=Uncharacterized protein {ECO:0000313|EMBL:KGN46285.1};
Cla007004	0	0	1.318	2.297	GO:0005576,extracellular region; GO:0004857,enzyme inhibitor activity	--	At5g46940	gb|ADN34098.1|	PLA1_PLAAC,RecName: Full=Putative invertase inhibitor; AltName: Full=Pollen allergen Pla a 1; AltName: Allergen=Pla a 1; Flags: Precursor;	E5GC99_CUCME,SubName: Full=Invertase inhibitor {ECO:0000313|EMBL:ADN34098.1};
Cla007008	0	1.611	0	0	GO:0005829,cytosol; GO:0005524,ATP binding; GO:0008865,fructokinase activity; GO:0006000,fructose metabolic process; GO:0019252,starch biosynthetic process	K00847: E2.7.1.4, scrK; fructokinase [EC:2.7.1.4]	At3g59480	ref|XP_004145029.1|	SCRK4_ARATH,RecName: Full=Probable fructokinase-4; EC=2.7.1.4;	A0A0A0KBS3_CUCSA,SubName: Full=Uncharacterized protein {ECO:0000313|EMBL:KGN46299.1};
Cla007065	0	1.329	0	0	--	--	--	ref|XP_008459965.1|	--	A0A1S3CCM7_CUCME,SubName: Full=uncharacterized protein LOC103498923 {ECO:0000313|RefSeq:XP_008459965.1};
Cla007077	1.601	0	0	0	GO:0016021,integral component of membrane; GO:0020037,heme binding; GO:0005506,iron ion binding; GO:0004497,monooxygenase activity; GO:0016705,oxidoreductase activity, acting on paired donors, with incorporation or reduction of molecular oxygen	K13260: CYP81E1_7; isoflavone/4'-methoxyisoflavone 2'-hydroxylase [EC:1.14.14.90 1.14.14.89]	At4g37310	ref|XP_008459942.1|	C81E8_MEDTR,RecName: Full=Cytochrome P450 81E8 {ECO:0000303|PubMed:14617078}; EC=1.14.13.- {ECO:0000305};	A0A1S3CAW8_CUCME,SubName: Full=isoflavone 3'-hydroxylase-like {ECO:0000313|RefSeq:XP_008459942.1};
Cla007078	1.052	0	0	0	GO:0016021,integral component of membrane; GO:0016020,membrane; GO:0020037,heme binding; GO:0005506,iron ion binding; GO:0016709,oxidoreductase activity, acting on paired donors, with incorporation or reduction of molecular oxygen, NAD(P)H as one donor, and incorporation of one atom of oxygen; GO:0044550,secondary metabolite biosynthetic process	K00512: CYP17A; steroid 17alpha-monooxygenase / 17alpha-hydroxyprogesterone deacetylase [EC:1.14.14.19 1.14.14.32]	At1g64940	ref|XP_008459941.1|	C89A2_ARATH,RecName: Full=Cytochrome P450 89A2; EC=1.14.-.-; AltName: Full=ATH 6-1; AltName: Full=CYPLXXXIX;	A0A1S3CCK7_CUCME,SubName: Full=cytochrome P450 89A2-like {ECO:0000313|RefSeq:XP_008459941.1};
Cla007150	-1.249	0	0	0	GO:0009507,chloroplast; GO:0047100,glyceraldehyde-3-phosphate dehydrogenase (NADP+) (phosphorylating) activity; GO:0051287,NAD binding; GO:0050661,NADP binding; GO:0006006,glucose metabolic process; GO:0019253,reductive pentose-phosphate cycle	K05298: GAPA; glyceraldehyde-3-phosphate dehydrogenase (NADP+) (phosphorylating) [EC:1.2.1.13]	At3g26650	ref|XP_008449975.1|	G3PA_PEA,RecName: Full=Glyceraldehyde-3-phosphate dehydrogenase A, chloroplastic; EC=1.2.1.13; AltName: Full=NADP-dependent glyceraldehydephosphate dehydrogenase subunit A; Flags: Precursor;	A0A1S3BMM6_CUCME,RecName: Full=Glyceraldehyde-3-phosphate dehydrogenase {ECO:0000256|RuleBase:RU361160}; EC=1.2.1.- {ECO:0000256|RuleBase:RU361160};
Cla007203	0	0	0	-2.184	GO:0030246,carbohydrate binding; GO:0030598,rRNA N-glycosylase activity; GO:0017148,negative regulation of translation	--	--	ref|XP_004140357.1|	SGSL_TRIAN,RecName: Full=Seed lectin {ECO:0000303|PubMed:23897472}; Short=SGSL {ECO:0000303|PubMed:23897472}; Contains: RecName: Full=Seed lectin Aalpha chain {ECO:0000303|PubMed:23897472}; Contains: RecName: Full=Seed lectin Abeta chain {ECO:0000303|PubMed:23897472}; Contains: RecName: Full=Seed lectin B chain {ECO:0000303|PubMed:23897472}; Flags: Fragments;	A0A0A0KN71_CUCSA,RecName: Full=rRNA N-glycosidase {ECO:0000256|RuleBase:RU004915}; EC=3.2.2.22 {ECO:0000256|RuleBase:RU004915};
Cla007232	1.097	0	0	0	--	K06670: SCC1, MCD1, RAD21; cohesin complex subunit SCC1	--	ref|XP_008454870.1|	--	A0A1S3BZ41_CUCME,SubName: Full=sister chromatid cohesion 1 protein 1 {ECO:0000313|RefSeq:XP_008454870.1};
Cla007307	0	0	0	-2.443	GO:0005634,nucleus; GO:0003700,DNA binding transcription factor activity; GO:0043565,sequence-specific DNA binding; GO:0042742,defense response to bacterium; GO:0050832,defense response to fungus; GO:0009864,induced systemic resistance, jasmonic acid mediated signaling pathway; GO:1900056,negative regulation of leaf senescence; GO:0045892,negative regulation of transcription, DNA-templated; GO:00…	--	At3g56400	gb|ACV29874.1|	WRK70_ARATH,RecName: Full=Probable WRKY transcription factor 70; AltName: Full=WRKY DNA-binding protein 70;	C8CP45_CITLA,SubName: Full=WRKY70 {ECO:0000313|EMBL:ACV29874.1};
Cla007326	0	1.037	0	0	GO:0009507,chloroplast	--	At5g19260	ref|XP_004139078.1|	FAFL_ARATH,RecName: Full=Protein FAF-like, chloroplastic; Flags: Precursor;	A0A0A0M0D7_CUCSA,SubName: Full=Uncharacterized protein {ECO:0000313|EMBL:KGN66592.1};
Cla007337	0	0	0	-1.586	GO:0005576,extracellular region; GO:0005773,vacuole	--	At5g06390	ref|XP_011660173.1|	FLA17_ARATH,RecName: Full=Fasciclin-like arabinogalactan protein 17; Flags: Precursor;	A0A0A0LXU1_CUCSA,SubName: Full=Uncharacterized protein {ECO:0000313|EMBL:KGN66568.1};
Cla007389	0	0	1.192	0	GO:0009507,chloroplast; GO:0005737,cytoplasm; GO:0010279,indole-3-acetic acid amido synthetase activity; GO:0010252,auxin homeostasis; GO:0009734,auxin-activated signaling pathway; GO:0009733,response to auxin; GO:0009826,unidimensional cell growth	K14487: GH3; auxin responsive GH3 gene family	At5g54510	ref|XP_023535071.1|	GH36_ARATH,RecName: Full=Indole-3-acetic acid-amido synthetase GH3.6; EC=6.3.2.-; AltName: Full=Auxin-responsive GH3-like protein 6; Short=AtGH3-6; AltName: Full=Protein DWARF IN LIGHT 1; Short=DFL-1;	A0A0A0LAR6_CUCSA,SubName: Full=Uncharacterized protein {ECO:0000313|EMBL:KGN58009.1};
Cla007407	1.41	0	0	0	--	K01322: PREP; prolyl oligopeptidase [EC:3.4.21.26]	At1g20380	ref|XP_008452924.1|	--	A0A1S3BV12_CUCME,SubName: Full=prolyl endopeptidase-like {ECO:0000313|RefSeq:XP_008452924.1};
Cla007419	-1.113	0	0	0	GO:0009507,chloroplast; GO:0009570,chloroplast stroma; GO:0009534,chloroplast thylakoid; GO:0009535,chloroplast thylakoid membrane; GO:0055035,plastid thylakoid membrane; GO:0009579,thylakoid; GO:0031977,thylakoid lumen; GO:0005507,copper ion binding; GO:0046028,electron transporter, transferring electrons from cytochrome b6/f complex of photosystem II activity; GO:0019904,protein domain specific…	K02638: petE; plastocyanin	At1g20340	ref|XP_022937324.1|	PLAS2_ARATH,RecName: Full=Plastocyanin major isoform, chloroplastic; AltName: Full=DNA-damage-repair/toleration protein DRT112; Flags: Precursor;	A0A1S3CRA6_CUCME,RecName: Full=Plastocyanin {ECO:0000256|RuleBase:RU363020};
Cla007427	-2.897	0	0	0	GO:0005737,cytoplasm; GO:0047134,protein-disulfide reductase activity; GO:0004791,thioredoxin-disulfide reductase activity; GO:0045454,cell redox homeostasis	K17609: NXN; nucleoredoxin [EC:1.8.1.8]	At1g60420	ref|XP_023535369.1|	NRX2_ORYSJ,RecName: Full=Probable nucleoredoxin 2; Short=OsNrx2; EC=1.8.1.8;	A0A1S3CRG9_CUCME,SubName: Full=probable nucleoredoxin 2 {ECO:0000313|RefSeq:XP_008466458.1};
Cla007455	-1.058	0	0	0	GO:0016021,integral component of membrane; GO:0005739,mitochondrion; GO:0005886,plasma membrane; GO:0005524,ATP binding; GO:0042277,peptide binding; GO:0004674,protein serine/threonine kinase activity; GO:0019199,transmembrane receptor protein kinase activity; GO:0070370,cellular heat acclimation; GO:0042742,defense response to bacterium; GO:0050832,defense response to fungus; GO:0048281,inflores…	K20718: ER; LRR receptor-like serine/threonine-protein kinase ERECTA [EC:2.7.11.1]	At2g26330	ref|XP_008452789.1|	ERECT_ARATH,RecName: Full=LRR receptor-like serine/threonine-protein kinase ERECTA {ECO:0000303|PubMed:8624444}; EC=2.7.11.1; AltName: Full=Protein QUANTITATIVE RESISTANCE TO PLECTOSPHAERELLA 1; AltName: Full=Protein QUANTITATIVE RESISTANCE TO RALSTONIA SOLANACEARUM 1; AltName: Full=Protein TRANSPIRATION EFFICIENCY 1; Flags: Precursor;	A0A1S3BVV6_CUCME,SubName: Full=LRR receptor-like serine/threonine-protein kinase ERECTA {ECO:0000313|RefSeq:XP_008452789.1};
Cla007521	-1.223	0	0	0	GO:0005737,cytoplasm; GO:0005886,plasma membrane; GO:0047150,betaine-homocysteine S-methyltransferase activity; GO:0008270,zinc ion binding; GO:0009086,methionine biosynthetic process	K00547: mmuM, BHMT2; homocysteine S-methyltransferase [EC:2.1.1.10]	At3g22740	ref|XP_008449335.1|	HMT3_ARATH,RecName: Full=Homocysteine S-methyltransferase 3; EC=2.1.1.10; AltName: Full=S-methylmethionine:homocysteine methyltransferase 3; Short=AtHMT-3; Short=SMM:Hcy S-methyltransferase 3;	A0A1S3BMQ2_CUCME,SubName: Full=homocysteine S-methyltransferase 3 {ECO:0000313|RefSeq:XP_008449335.1};
Cla007536	0	0	1.233	0	GO:0005622,intracellular; GO:0005509,calcium ion binding; GO:0019722,calcium-mediated signaling; GO:0005513,detection of calcium ion	K13448: CML; calcium-binding protein CML	At4g14640	ref|XP_023548669.1|	CML8_ARATH,RecName: Full=Calmodulin-like protein 8; Short=AtCaM-8;	A0A0A0LLM7_CUCSA,SubName: Full=Uncharacterized protein {ECO:0000313|EMBL:KGN61657.1};
Cla007549	-1.617	0	0	0	--	--	--	ref|XP_004150431.2|	--	A0A0A0LIA4_CUCSA,SubName: Full=Uncharacterized protein {ECO:0000313|EMBL:KGN61640.1};
Cla007550	-2.375	0	0	0	--	--	--	ref|XP_008465184.1|	--	A0A1S3CN76_CUCME,SubName: Full=protein SIEVE ELEMENT OCCLUSION B-like {ECO:0000313|RefSeq:XP_008465184.1};
Cla007551	-1.291	0	0	0	--	--	--	ref|XP_008465186.2|	--	A0A1S3CNA9_CUCME,SubName: Full=protein SIEVE ELEMENT OCCLUSION B-like {ECO:0000313|RefSeq:XP_008465186.2};
Cla007552	-1.222	0	0	0	--	--	--	ref|XP_008465187.1|	--	A0A1S3CNP9_CUCME,SubName: Full=protein SIEVE ELEMENT OCCLUSION B-like {ECO:0000313|RefSeq:XP_008465187.1};
Cla007553	-1.106	0	0	0	--	--	--	ref|XP_004150405.2|	--	A0A0A0LKQ5_CUCSA,SubName: Full=Uncharacterized protein {ECO:0000313|EMBL:KGN61634.1};
Cla007556	-1.533	0	0	0	--	--	--	ref|XP_004150407.1|	--	A0A0A0LNQ7_CUCSA,SubName: Full=Uncharacterized protein {ECO:0000313|EMBL:KGN61631.1};
Cla007557	-1.307	0	0	0	--	--	--	ref|XP_004150408.1|	--	A0A0A0LI98_CUCSA,SubName: Full=Uncharacterized protein {ECO:0000313|EMBL:KGN61630.1};
Cla007573	-1.119	0	0	-1.276	GO:0046872,metal ion binding; GO:0016491,oxidoreductase activity	--	At2g30830	ref|XP_008460628.1|	ACCH1_ARATH,RecName: Full=1-aminocyclopropane-1-carboxylate oxidase homolog 1;	A0A1S3CCZ4_CUCME,SubName: Full=1-aminocyclopropane-1-carboxylate oxidase homolog 6 {ECO:0000313|RefSeq:XP_008460628.1};
Cla007579	0	0	0	-1.067	--	--	Hs17459269	--	--	--
Cla007581	0	0	0	-1.628	--	--	--	--	--	--
Cla007582	0	0	0	-2.076	--	--	--	gb|ABF19725.1|	--	A0MCW3_CUCSA,SubName: Full=Pathogen induced 4 protein {ECO:0000313|EMBL:ABF19725.1};
Cla007615	-1.644	0	0	0	GO:0005783,endoplasmic reticulum; GO:0005811,lipid droplet; GO:0031090,organelle membrane; GO:0046872,metal ion binding; GO:1990137,plant seed peroxidase activity	K17991: PXG; peroxygenase [EC:1.11.2.3]	At4g26740	ref|XP_004147185.1|	PXG_SESIN,RecName: Full=Peroxygenase; EC=1.11.2.3; AltName: Full=Caleosin; Short=SiCLO;	B0F824_CUCSA,SubName: Full=Caleosin {ECO:0000313|EMBL:ABY56103.1};
Cla007635	0	0	-1.394	0	GO:0009507,chloroplast; GO:0005829,cytosol; GO:0005634,nucleus; GO:0102229,amylopectin maltohydrolase activity; GO:0016161,beta-amylase activity; GO:0009414,response to water deprivation; GO:0005983,starch catabolic process	K01177: E3.2.1.2; beta-amylase [EC:3.2.1.2]	At3g23920	ref|XP_004147196.1|	BAM1_ARATH,RecName: Full=Beta-amylase 1, chloroplastic; EC=3.2.1.2; AltName: Full=1,4-alpha-D-glucan maltohydrolase; AltName: Full=Beta-amylase 7; AltName: Full=Thioredoxin-regulated beta-amylase; Short=TR-BAMY; Flags: Precursor;	A0A0A0LIF1_CUCSA,RecName: Full=Beta-amylase {ECO:0000256|RuleBase:RU000509}; EC=3.2.1.2 {ECO:0000256|RuleBase:RU000509};
Cla007644	0	0	0	-1.916	GO:0005887,integral component of plasma membrane; GO:0005634,nucleus; GO:0005886,plasma membrane; GO:0009506,plasmodesma; GO:0008519,ammonium transmembrane transporter activity; GO:0043621,protein self-association; GO:0015696,ammonium transport; GO:0080181,lateral root branching; GO:0010311,lateral root formation; GO:0015695,organic cation transport; GO:0051258,protein polymerization; GO:0009737,…	K03320: amt, AMT, MEP; ammonium transporter, Amt family	At4g13510	ref|XP_008460720.1|	AMT11_ARATH,RecName: Full=Ammonium transporter 1 member 1; Short=AtAMT1;1;	A0A1S3CE99_CUCME,RecName: Full=Ammonium transporter {ECO:0000256|RuleBase:RU362002};
Cla007678	0	1.117	0	0	GO:0005829,cytosol; GO:0005634,nucleus; GO:0010089,xylem development	--	--	ref|XP_008455422.1|	VUP1_ARATH,RecName: Full=Vascular-related unknown protein 1 {ECO:0000303|PubMed:24567189};	A0A1S3C0F7_CUCME,SubName: Full=uncharacterized protein LOC103495585 {ECO:0000313|RefSeq:XP_008455422.1};
Cla007693	0	0	0	-4.946	GO:0005618,cell wall; GO:0005576,extracellular region; GO:0005773,vacuole; GO:0009737,response to abscisic acid	K04733: IRAK4; interleukin-1 receptor-associated kinase 4 [EC:2.7.11.1]	At3g22060	ref|XP_008455404.1|	CRR38_ARATH,RecName: Full=Cysteine-rich repeat secretory protein 38; Flags: Precursor;	A0A1S3C1J7_CUCME,SubName: Full=cysteine-rich repeat secretory protein 38-like {ECO:0000313|RefSeq:XP_008455404.1};
Cla007705	0	2.341	0	0	--	--	--	gb|KGN43559.1|	--	A0A0A0K3N0_CUCSA,SubName: Full=Uncharacterized protein {ECO:0000313|EMBL:KGN43559.1};
Cla007706	1.923	0	0	0	GO:0000784,nuclear chromosome, telomeric region; GO:0035312,5'-3' exodeoxyribonuclease activity; GO:0003684,damaged DNA binding; GO:0006281,DNA repair; GO:0006303,double-strand break repair via nonhomologous end joining; GO:0036297,interstrand cross-link repair; GO:0031848,protection from non-homologous end joining at telomere	K15341: DCLRE1B, SNM1B; DNA cross-link repair 1B protein [EC:3.1.-.-]	At1g27410	ref|XP_008455369.1|	SNM1_ARATH,RecName: Full=DNA cross-link repair protein SNM1; Short=AtSNM1;	A0A1S3C1Z6_CUCME,SubName: Full=5' exonuclease Apollo {ECO:0000313|RefSeq:XP_008455369.1};
Cla007721	0	0	0	-5.924	--	--	--	gb|KGN43575.1|	--	A0A0A0K1Q2_CUCSA,SubName: Full=Uncharacterized protein {ECO:0000313|EMBL:KGN43575.1};
Cla007724	-1.998	0	2.302	0	--	--	At4g10270	ref|XP_023554652.1|	--	A0A1S3C0Q4_CUCME,SubName: Full=uncharacterized protein LOC103495542 {ECO:0000313|RefSeq:XP_008455355.1};
Cla007725	-2.786	0	0	-1.138	--	--	At4g10270	gb|KGN43580.1|	--	A0A0A0K1Q6_CUCSA,SubName: Full=Uncharacterized protein {ECO:0000313|EMBL:KGN43580.1};
Cla007726	-1.051	0	0	0	--	--	At4g28240	gb|KGN43581.1|	--	A0A0A0K6Z3_CUCSA,SubName: Full=Uncharacterized protein {ECO:0000313|EMBL:KGN43581.1};
Cla007741	-1.694	0	0	0	GO:0009507,chloroplast; GO:0009534,chloroplast thylakoid; GO:0009543,chloroplast thylakoid lumen; GO:0009535,chloroplast thylakoid membrane; GO:0009579,thylakoid; GO:0071484,cellular response to light intensity; GO:0010207,photosystem II assembly; GO:0010206,photosystem II repair	K08902: psb27; photosystem II Psb27 protein	At1g03600	ref|XP_008455335.1|	PB27A_ARATH,RecName: Full=Photosystem II repair protein PSB27-H1, chloroplastic; Short=Psb27-H1; AltName: Full=Thylakoid lumenal protein PSB27-H1; Flags: Precursor;	A0A1S3C1X2_CUCME,SubName: Full=photosystem II repair protein PSB27-H1, chloroplastic {ECO:0000313|RefSeq:XP_008455335.1};
Cla007757	0	0	0	-3.069	--	--	--	ref|XP_004148451.1|	--	A0A0A0LM41_CUCSA,SubName: Full=Uncharacterized protein {ECO:0000313|EMBL:KGN62094.1};
Cla007777	0	0	-1.104	0	GO:0009507,chloroplast; GO:0000287,magnesium ion binding; GO:0050551,myrcene synthase activity; GO:0008152,metabolic process	--	At3g25823	ref|XP_021603131.1|	MYRS_QUEIL,RecName: Full=Myrcene synthase, chloroplastic; EC=4.2.3.15; Flags: Precursor;	A0A2C9UWS1_MANES,SubName: Full=Uncharacterized protein {ECO:0000313|EMBL:OAY36019.1};
Cla007779	0	2.239	0	0	GO:0009507,chloroplast; GO:0000287,magnesium ion binding; GO:0050551,myrcene synthase activity; GO:0008152,metabolic process	K07385: TPS-Cin; 1,8-cineole synthase [EC:4.2.3.108]	At3g25830	ref|XP_011649391.1|	MYRS_QUEIL,RecName: Full=Myrcene synthase, chloroplastic; EC=4.2.3.15; Flags: Precursor;	A0A1S3CDJ7_CUCME,SubName: Full=terpene synthase 10-like isoform X1 {ECO:0000313|RefSeq:XP_008460926.1};
Cla007820	1.566	0	0	0	GO:0016021,integral component of membrane; GO:0005886,plasma membrane; GO:0005524,ATP binding; GO:0042626,ATPase activity, coupled to transmembrane movement of substances	K05681: ABCG2, CD338; ATP-binding cassette, subfamily G (WHITE), member 2	At2g13610	ref|XP_008460882.1|	AB5G_ARATH,RecName: Full=ABC transporter G family member 5; Short=ABC transporter ABCG.5; Short=AtABCG5; AltName: Full=White-brown complex homolog protein 5; Short=AtWBC5;	A0A1S3CDF7_CUCME,SubName: Full=ABC transporter G family member 5 {ECO:0000313|RefSeq:XP_008460882.1};
Cla007856	0	-1.002	0	0	GO:0048046,apoplast; GO:0005618,cell wall; GO:0005773,vacuole; GO:0004565,beta-galactosidase activity; GO:0030246,carbohydrate binding; GO:0005975,carbohydrate metabolic process	--	At5g63810	gb|KGN62231.1|	BGAL3_ORYSJ,RecName: Full=Beta-galactosidase 3; Short=Lactase 3; EC=3.2.1.23; Flags: Precursor;	A0A0A0LQE8_CUCSA,RecName: Full=Beta-galactosidase {ECO:0000256|RuleBase:RU000675}; EC=3.2.1.23 {ECO:0000256|RuleBase:RU000675};
Cla007867	0	-1.392	0	0	GO:0005737,cytoplasm; GO:0005634,nucleus; GO:0003677,DNA binding; GO:0003700,DNA binding transcription factor activity; GO:0046983,protein dimerization activity; GO:0010629,negative regulation of gene expression; GO:0006355,regulation of transcription, DNA-templated; GO:0006351,transcription, DNA-templated	--	At4g00870	ref|XP_008441948.1|	BH014_ARATH,RecName: Full=Transcription factor bHLH14; AltName: Full=Basic helix-loop-helix protein 14; Short=AtbHLH14; Short=bHLH 14; AltName: Full=Transcription factor EN 33; AltName: Full=bHLH transcription factor bHLH014;	A0A1S3B4K7_CUCME,SubName: Full=transcription factor MYC3-like {ECO:0000313|RefSeq:XP_008441948.1};
Cla007871	-1.393	0	0	0	GO:0009535,chloroplast thylakoid membrane; GO:0009538,photosystem I reaction center; GO:0051219,phosphoprotein binding; GO:0015979,photosynthesis	K02693: psaE; photosystem I subunit IV	At2g20260	ref|XP_008441802.1|	PSAE_SPIOL,RecName: Full=Photosystem I reaction center subunit IV, chloroplastic; Short=PSI-E; Flags: Precursor;	A0A1S3B3T3_CUCME,SubName: Full=photosystem I reaction center subunit IV, chloroplastic-like {ECO:0000313|RefSeq:XP_008441802.1};
Cla007966	1.026	0	0	0	--	--	--	ref|XP_011656511.1|	--	A0A0A0KDT7_CUCSA,SubName: Full=Uncharacterized protein {ECO:0000313|EMBL:KGN45941.1};
Cla007979	0	0	0	-3.435	GO:0005634,nucleus; GO:0003677,DNA binding; GO:0003700,DNA binding transcription factor activity; GO:0006355,regulation of transcription, DNA-templated; GO:0006351,transcription, DNA-templated	--	At1g25550	ref|XP_008445641.1|	HHO3_ARATH,RecName: Full=Transcription factor HHO3 {ECO:0000305}; AltName: Full=MYB-domain transcription factor HHO3 {ECO:0000305}; AltName: Full=Protein HRS1 HOMOLOG 3 {ECO:0000305};	A0A1S3BDW6_CUCME,SubName: Full=probable transcription factor GLK2 {ECO:0000313|RefSeq:XP_008445641.1};
Cla007995	-1.066	0	0	0	GO:0016021,integral component of membrane; GO:0097708,intracellular vesicle; GO:0005886,plasma membrane; GO:0022857,transmembrane transporter activity; GO:0010336,gibberellic acid homeostasis; GO:0042128,nitrate assimilation	--	At1g68570	ref|XP_022994014.1|	PTR18_ARATH,RecName: Full=Protein NRT1/ PTR FAMILY 3.1; Short=AtNPF3.1;	A0A0A0K953_CUCSA,SubName: Full=Uncharacterized protein {ECO:0000313|EMBL:KGN45953.1};
Cla008029	0	0	0	-1.078	GO:0005737,cytoplasm; GO:0005634,nucleus; GO:0009734,auxin-activated signaling pathway; GO:0007275,multicellular organism development; GO:0040008,regulation of growth; GO:1900140,regulation of seedling development	K14488: SAUR; SAUR family protein	At5g53590	gb|KGN54862.1|	SAU32_ARATH,RecName: Full=Auxin-responsive protein SAUR32 {ECO:0000305}; AltName: Full=Protein ABOLISHED APICAL HOOK MAINTENANCE 1 {ECO:0000303|Ref.6}; AltName: Full=Protein SMALL AUXIN UP RNA 32 {ECO:0000303|PubMed:12036261};	A0A0A0L2M8_CUCSA,SubName: Full=SAUR family protein {ECO:0000313|EMBL:KGN54862.1};
Cla008088	-1.726	0	0	0	--	--	--	ref|XP_022949716.1|	--	A0A0A0KW14_CUCSA,SubName: Full=Acetate kinase {ECO:0000313|EMBL:KGN53820.1};
Cla008152	-1.895	0	0	0	GO:0005737,cytoplasm; GO:0005634,nucleus; GO:0005524,ATP binding; GO:0004709,MAP kinase kinase kinase activity; GO:0004674,protein serine/threonine kinase activity; GO:0004702,signal transducer, downstream of receptor, with serine/threonine kinase activity; GO:0009738,abscisic acid-activated signaling pathway; GO:0032147,activation of protein kinase activity; GO:0007346,regulation of mitotic cell…	--	At1g07150	ref|XP_008457561.1|	M3K17_ARATH,RecName: Full=Mitogen-activated protein kinase kinase kinase 17 {ECO:0000303|PubMed:25720833}; EC=2.7.11.25 {ECO:0000250|UniProtKB:Q9ZVP5, ECO:0000255|PROSITE-ProRule:PRU00159};	A0A1S3C5Y2_CUCME,SubName: Full=mitogen-activated protein kinase kinase kinase NPK1 {ECO:0000313|RefSeq:XP_008457561.1};
Cla008153	0	1.121	0	0	GO:0046872,metal ion binding; GO:0004722,protein serine/threonine phosphatase activity	K17506: PPM1L, PP2CE; protein phosphatase 1L [EC:3.1.3.16]	At1g07160	ref|XP_008457358.1|	P2C02_ARATH,RecName: Full=Probable protein phosphatase 2C 2; Short=AtPP2C02; EC=3.1.3.16; AltName: Full=Protein phosphatase AP2C2;	A0A1S3C603_CUCME,SubName: Full=probable protein phosphatase 2C 25 {ECO:0000313|RefSeq:XP_008457358.1};
Cla008161	-1.035	0	0	0	GO:0016021,integral component of membrane; GO:0005524,ATP binding; GO:0042803,protein homodimerization activity; GO:0004674,protein serine/threonine kinase activity	K04733: IRAK4; interleukin-1 receptor-associated kinase 4 [EC:2.7.11.1]	At3g55950	ref|XP_004154335.1|	ACCR3_ARATH,RecName: Full=Putative serine/threonine-protein kinase-like protein CCR3; EC=2.7.11.1; AltName: Full=Protein CRINKLY 4 RELATED 3; Short=AtCRR3; Flags: Precursor;	A0A0A0LV62_CUCSA,SubName: Full=Uncharacterized protein {ECO:0000313|EMBL:KGN65810.1};
Cla008185	-1.702	0	0	0	--	--	At4g37300	ref|XP_004154227.1|	--	A0A1S3C5E6_CUCME,SubName: Full=uncharacterized protein LOC103497099 isoform X2 {ECO:0000313|RefSeq:XP_008457402.1};
Cla008202	0	0	0	-2.55	GO:0016021,integral component of membrane; GO:0016020,membrane; GO:0005375,copper ion transmembrane transporter activity; GO:0006825,copper ion transport; GO:0048235,pollen sperm cell differentiation; GO:0048364,root development	K14686: SLC31A1, CTR1; solute carrier family 31 (copper transporter), member 1	At5g59030	gb|KGN65764.1|	COPT1_ARATH,RecName: Full=Copper transporter 1; Short=AtCOPT1;	A0A0A0LXH5_CUCSA,SubName: Full=Uncharacterized protein {ECO:0000313|EMBL:KGN65764.1};
Cla008203	-1.977	0	0	0	GO:0016021,integral component of membrane; GO:0005773,vacuole; GO:0005375,copper ion transmembrane transporter activity	--	At5g59030	ref|XP_008457427.1|	COPT6_ARATH,RecName: Full=Copper transporter 6; Short=AtCOPT6;	A0A1S3C5M2_CUCME,SubName: Full=copper transporter 1 {ECO:0000313|RefSeq:XP_008457427.1};
Cla008207	-1.423	0	0	0	--	--	At5g59080	ref|XP_004153966.1|	--	A0A0A0LXG9_CUCSA,SubName: Full=Uncharacterized protein {ECO:0000313|EMBL:KGN65759.1};
Cla008212	-1.398	0	0	0	GO:0005886,plasma membrane; GO:0046872,metal ion binding; GO:0005267,potassium channel activity; GO:0004722,protein serine/threonine phosphatase activity; GO:0009788,negative regulation of abscisic acid-activated signaling pathway; GO:1902039,negative regulation of seed dormancy process; GO:0009939,positive regulation of gibberellic acid mediated signaling pathway; GO:0010030,positive regulation …	K14497: PP2C; protein phosphatase 2C [EC:3.1.3.16]	At1g07430	ref|XP_004145326.1|	P2C03_ARATH,RecName: Full=Protein phosphatase 2C 3; Short=AtPP2C03; EC=3.1.3.16; AltName: Full=Protein AKT1-INTERACTING 1; AltName: Full=Protein phosphatase 2C AIP1; Short=PP2C AIP1;	A0A0A0LXG6_CUCSA,SubName: Full=Uncharacterized protein {ECO:0000313|EMBL:KGN65754.1};
Cla008216	0	0	0	1.203	GO:0005634,nucleus; GO:0003677,DNA binding; GO:0003700,DNA binding transcription factor activity; GO:0046872,metal ion binding; GO:0051973,positive regulation of telomerase activity; GO:0006355,regulation of transcription, DNA-templated; GO:0006351,transcription, DNA-templated	--	--	ref|XP_004145329.1|	TAC1_ARATH,RecName: Full=Transcriptional regulator TAC1; AltName: Full=Protein TELOMERASE ACTIVATOR1;	A0A0A0LXG2_CUCSA,SubName: Full=Uncharacterized protein {ECO:0000313|EMBL:KGN65749.1};
Cla008226	2.234	0	0	0	--	K07025: K07025; putative hydrolase of the HAD superfamily	At5g59480	ref|XP_016902087.1|	--	A0A1S4E1I6_CUCME,SubName: Full=LOW QUALITY PROTEIN: uncharacterized protein LOC107990309 {ECO:0000313|RefSeq:XP_016902087.1};
Cla008255	0	0	0	-1.767	GO:0005618,cell wall; GO:0005576,extracellular region	--	At2g28790	gb|AUG68886.1|	OLP1_SOLLC,RecName: Full=Osmotin-like protein; Flags: Precursor;	A0A2H5AC56_CITLA,SubName: Full=Thaumatin-like protein {ECO:0000313|EMBL:AUG68886.1};
Cla008292	0	1.015	1.02	0	--	--	--	--	--	--
Cla008298	0	0	1.386	0	GO:0005622,intracellular; GO:0005524,ATP binding; GO:0004707,MAP kinase activity	K04371: ERK, MAPK1_3; mitogen-activated protein kinase 1/3 [EC:2.7.11.24]	At1g07880	ref|XP_004148790.2|	NTF6_TOBAC,RecName: Full=Mitogen-activated protein kinase homolog NTF6; EC=2.7.11.24; AltName: Full=P43;	A0A0A0LS13_CUCSA,RecName: Full=Mitogen-activated protein kinase {ECO:0000256|RuleBase:RU361165, ECO:0000256|SAAS:SAAS00652812}; EC=2.7.11.24 {ECO:0000256|RuleBase:RU361165, ECO:0000256|SAAS:SAAS00652812};
Cla008329	1.033	0	0	0	GO:0031225,anchored component of membrane; GO:0046658,anchored component of plasma membrane; GO:0005886,plasma membrane; GO:0016491,oxidoreductase activity	--	At1g74790	ref|XP_008437727.1|	HIPL1_ARATH,RecName: Full=HIPL1 protein; Flags: Precursor;	A0A1S3AUT8_CUCME,SubName: Full=HIPL1 protein-like isoform X1 {ECO:0000313|RefSeq:XP_008437727.1};
Cla008338	0	0	2.053	4.291	--	--	At5g62720	ref|XP_011651222.1|	--	A0A0A0LR37_CUCSA,SubName: Full=Uncharacterized protein {ECO:0000313|EMBL:KGN64258.1};
Cla008396	1.389	0	0	0	GO:0046658,anchored component of plasma membrane; GO:0009507,chloroplast; GO:0016021,integral component of membrane; GO:0009506,plasmodesma; GO:0004871,signal transducer activity; GO:0051607,defense response to virus	--	At3g11650	ref|XP_008462616.1|	NHL2_ARATH,RecName: Full=NDR1/HIN1-like protein 2 {ECO:0000303|Ref.1};	A0A1S3CHB3_CUCME,SubName: Full=NDR1/HIN1-Like protein 3-like {ECO:0000313|RefSeq:XP_008462616.1};
Cla008397	1.986	0	0	0	GO:0005576,extracellular region; GO:0004190,aspartic-type endopeptidase activity	K01379: CTSD; cathepsin D [EC:3.4.23.5]	At3g52500	ref|XP_023543736.1|	NEP2_NEPGR,RecName: Full=Aspartic proteinase nepenthesin-2; EC=3.4.23.12; AltName: Full=Nepenthesin-II; Flags: Precursor;	A0A0A0KHK2_CUCSA,SubName: Full=Uncharacterized protein {ECO:0000313|EMBL:KGN48299.1};
Cla008420	-1.761	0	0	0	--	--	--	gb|KGN64832.1|	--	A0A0A0LVH4_CUCSA,SubName: Full=Cystatin Hv-CPI6 {ECO:0000313|EMBL:KGN64832.1};
Cla008423	0	-1.519	0	0	--	--	--	gb|KGN48338.1|	--	A0A0A0KFK8_CUCSA,SubName: Full=Uncharacterized protein {ECO:0000313|EMBL:KGN48338.1};
Cla008457	0	0	0	-1.433	GO:0016021,integral component of membrane; GO:0005886,plasma membrane; GO:0022857,transmembrane transporter activity	K17500: ILKAP; integrin-linked kinase-associated serine/threonine phosphatase 2C [EC:3.1.3.16]	At5g64700	ref|XP_008441006.1|	WTR45_ARATH,RecName: Full=WAT1-related protein At5g64700;	A0A1S3B374_CUCME,RecName: Full=WAT1-related protein {ECO:0000256|RuleBase:RU363077};
Cla008458	0	-1.098	-1.211	0	--	--	At3g18800	ref|XP_008441005.1|	--	A0A1S3B333_CUCME,SubName: Full=uncharacterized protein LOC103485248 {ECO:0000313|RefSeq:XP_008441005.1};
Cla008460	1.208	0	0	-1.663	GO:0016021,integral component of membrane; GO:0005886,plasma membrane; GO:0022857,transmembrane transporter activity	K17500: ILKAP; integrin-linked kinase-associated serine/threonine phosphatase 2C [EC:3.1.3.16]	At5g64700	ref|XP_008441001.1|	WTR45_ARATH,RecName: Full=WAT1-related protein At5g64700;	A0A1S3B1Z4_CUCME,RecName: Full=WAT1-related protein {ECO:0000256|RuleBase:RU363077};
Cla008498	0	0	0	-1.38	GO:0005783,endoplasmic reticulum; GO:0005789,endoplasmic reticulum membrane; GO:0016021,integral component of membrane; GO:0020037,heme binding; GO:0005506,iron ion binding; GO:0080133,midchain alkane hydroxylase activity; GO:0010025,wax biosynthetic process	K15405: MAH1, CYP96A15; midchain alkane hydroxylase	At2g23180	ref|XP_004142036.2|	C96AF_ARATH,RecName: Full=Alkane hydroxylase MAH1 {ECO:0000303|PubMed:17905869}; EC=1.14.-.- {ECO:0000305|PubMed:17905869}; AltName: Full=Cytochrome P450 96A15 {ECO:0000305}; AltName: Full=Protein MID-CHAIN ALKANE HYDROXYLASE 1 {ECO:0000303|PubMed:17905869};	A0A0A0KFE7_CUCSA,SubName: Full=Uncharacterized protein {ECO:0000313|EMBL:KGN48435.1};
Cla008554	-1.231	0	0	0	GO:0009535,chloroplast thylakoid membrane; GO:0009523,photosystem II; GO:0015979,photosynthesis	--	At1g51400	ref|XP_008449703.1|	PST2_PETHY,RecName: Full=Photosystem II 5 kDa protein, chloroplastic {ECO:0000303|PubMed:22700981}; Flags: Precursor;	A0A1S3BML8_CUCME,SubName: Full=photosystem II 5 kDa protein, chloroplastic {ECO:0000313|RefSeq:XP_008449703.1};
Cla008580	1.02	0	0	0	GO:0031969,chloroplast membrane; GO:0016021,integral component of membrane; GO:0009536,plastid; GO:0002229,defense response to oomycetes; GO:0034635,glutathione transport; GO:0046686,response to cadmium ion	--	At4g24460	ref|XP_008449652.1|	CLT3_ARATH,RecName: Full=Protein CLT3, chloroplastic {ECO:0000303|PubMed:20080670}; AltName: Full=CRT-like transporter 3 {ECO:0000303|PubMed:20080670}; AltName: Full=Chloroquine-resistance transporter-like transporter 3 {ECO:0000303|PubMed:20080670}; Flags: Precursor;	A0A1S3BMI5_CUCME,SubName: Full=protein CLT1, chloroplastic {ECO:0000313|RefSeq:XP_008449652.1};
Cla008586	-1.535	0	0	0	--	--	At2g26850	ref|XP_008449641.1|	FB118_ARATH,RecName: Full=F-box protein At2g26850;	A0A1S3BN51_CUCME,SubName: Full=F-box protein At2g32560 {ECO:0000313|RefSeq:XP_008449641.1};
Cla008617	0	-1.782	-1.415	-1.596	GO:0009507,chloroplast	--	At5g19260	ref|XP_004140267.1|	FAFL_ARATH,RecName: Full=Protein FAF-like, chloroplastic; Flags: Precursor;	A0A0A0KI67_CUCSA,SubName: Full=Uncharacterized protein {ECO:0000313|EMBL:KGN48052.1};
Cla008631	-1.344	0	0	0	GO:0016020,membrane; GO:0019005,SCF ubiquitin ligase complex; GO:0019218,regulation of steroid metabolic process	--	At2g36090	ref|XP_011658460.1|	FB346_ARATH,RecName: Full=F-box protein At3g44326;	A0A1S4DYD6_CUCME,SubName: Full=probable F-box protein At1g60180 {ECO:0000313|RefSeq:XP_016900730.1};
Cla008649	-1.238	0	0	0	GO:0005634,nucleus; GO:0003700,DNA binding transcription factor activity; GO:0042803,protein homodimerization activity; GO:0043565,sequence-specific DNA binding; GO:0048653,anther development; GO:0071588,hydrogen peroxide mediated signaling pathway; GO:0002237,response to molecule of bacterial origin; GO:0006351,transcription, DNA-templated	K14431: TGA; transcription factor TGA	At1g08320_1	ref|XP_022985781.1|	TGA9_ARATH,RecName: Full=Transcription factor TGA9 {ECO:0000303|PubMed:20805327}; AltName: Full=Protein TGACG (TGA) motif-binding protein 9 {ECO:0000303|PubMed:20805327}; AltName: Full=bZIP transcription factor 21 {ECO:0000303|PubMed:11906833}; Short=AtbZIP21 {ECO:0000303|PubMed:11906833};	A0A0A0KDN7_CUCSA,SubName: Full=Uncharacterized protein {ECO:0000313|EMBL:KGN46949.1};
Cla008667	0	1.295	0	0	GO:0009507,chloroplast; GO:0046872,metal ion binding	--	At5g22580	ref|XP_022943456.1|	Y5258_ARATH,RecName: Full=Stress-response A/B barrel domain-containing protein At5g22580 {ECO:0000305}; AltName: Full=Uncharacterized protein At5g22580;	A0A1S3C8U9_CUCME,SubName: Full=stress-response A/B barrel domain-containing protein At5g22580 {ECO:0000313|RefSeq:XP_008458618.1};
Cla008678	1.564	0	0	0	GO:0005634,nucleus; GO:0003677,DNA binding; GO:0006355,regulation of transcription, DNA-templated; GO:0006351,transcription, DNA-templated	--	At2g45850	ref|XP_008458631.1|	AHL9_ARATH,RecName: Full=AT-hook motif nuclear-localized protein 9 {ECO:0000312|EMBL:FAA00280.1};	A0A1S3C8E7_CUCME,SubName: Full=AT-hook motif nuclear-localized protein 9-like isoform X1 {ECO:0000313|RefSeq:XP_008458631.1};
Cla008697	-1.163	0	0	0	GO:0005634,nucleus; GO:0003700,DNA binding transcription factor activity; GO:0046872,metal ion binding; GO:0043565,sequence-specific DNA binding; GO:0006355,regulation of transcription, DNA-templated; GO:0006351,transcription, DNA-templated	--	At2g28200	ref|XP_008466979.1|	ZAT5_ARATH,RecName: Full=Zinc finger protein ZAT5;	A0A1S3CSG9_CUCME,SubName: Full=zinc finger protein ZAT5-like {ECO:0000313|RefSeq:XP_008466979.1};
Cla008700	0	1.228	0	0	GO:0005634,nucleus; GO:0003677,DNA binding; GO:0003700,DNA binding transcription factor activity; GO:0046983,protein dimerization activity; GO:0071369,cellular response to ethylene stimulus; GO:0071281,cellular response to iron ion; GO:0071732,cellular response to nitric oxide; GO:0034756,regulation of iron ion transport; GO:0006355,regulation of transcription, DNA-templated; GO:0010039,response …	--	At2g28160	ref|XP_004145819.1|	FIT_ARATH,RecName: Full=Transcription factor FER-LIKE IRON DEFICIENCY-INDUCED TRANSCRIPTION FACTOR; AltName: Full=Basic helix-loop-helix protein 29; Short=AtbHLH29; Short=bHLH 29; AltName: Full=FER-LIKE REGULATOR OF IRON UPTAKE; AltName: Full=Transcription factor EN 43; AltName: Full=Transcription factor Fe-DEFICIENCY INDUCED TRANSCRIPTION FACTOR 1; AltName: Full=bHLH transcription factor bHLH029;	A0A1S3CQB6_CUCME,SubName: Full=transcription factor FER-LIKE IRON DEFICIENCY-INDUCED TRANSCRIPTION FACTOR isoform X1 {ECO:0000313|RefSeq:XP_008465418.1};
Cla008704	0	1.729	0	0	--	--	At5g22930	ref|XP_008465402.1|	--	A0A1S3CNT5_CUCME,SubName: Full=uncharacterized protein LOC103503032 {ECO:0000313|RefSeq:XP_008465402.1};
Cla008705	0	0	0	1.213	GO:0005794,Golgi apparatus; GO:0000139,Golgi membrane; GO:0016021,integral component of membrane; GO:0015020,glucuronosyltransferase activity; GO:0071555,cell wall organization; GO:0010417,glucuronoxylan biosynthetic process; GO:0009834,plant-type secondary cell wall biogenesis; GO:0006486,protein glycosylation	K20889: IRX7, FRA8, F8H; probable glucuronoxylan glucuronosyltransferase IRX7 [EC2.4.1.-]	At2g28110	ref|XP_004145764.1|	IRX7_ARATH,RecName: Full=Probable glucuronoxylan glucuronosyltransferase IRX7; EC=2.4.1.-; AltName: Full=Protein FRAGILE FIBER 8; AltName: Full=Protein IRREGULAR XYLEM 7;	A0A0A0KDE2_CUCSA,SubName: Full=Uncharacterized protein {ECO:0000313|EMBL:KGN46874.1};
Cla008732	-3.276	0	0	0	GO:0016021,integral component of membrane; GO:0031965,nuclear membrane; GO:0044325,ion channel binding; GO:0005249,voltage-gated potassium channel activity	K05391: CNGC; cyclic nucleotide gated channel, plant	At2g28260	ref|XP_011657004.1|	CN15C_MEDTR,RecName: Full=Protein CNGC15c {ECO:0000303|PubMed:27230377}; AltName: Full=Cyclic nucleotide-gated ion channel protein 15 c {ECO:0000303|PubMed:27230377};	A0A0A0KGF9_CUCSA,SubName: Full=Uncharacterized protein {ECO:0000313|EMBL:KGN46846.1};
Cla008733	-1.196	0	0	0	GO:0005829,cytosol; GO:0005634,nucleus; GO:0016787,hydrolase activity; GO:0009691,cytokinin biosynthetic process	K22522: LOG; cytokinin riboside 5'-monophosphate phosphoribohydrolase [EC:3.2.2.-]	At3g53450	ref|XP_004145748.1|	LOG1_ARATH,RecName: Full=Cytokinin riboside 5'-monophosphate phosphoribohydrolase LOG1; EC=3.2.2.n1; AltName: Full=Protein LONELY GUY 1;	A0A1S3CKD9_CUCME,RecName: Full=Cytokinin riboside 5'-monophosphate phosphoribohydrolase {ECO:0000256|RuleBase:RU363015}; EC=3.2.2.n1 {ECO:0000256|RuleBase:RU363015};
Cla008735	0	0	0	-1.176	GO:0005783,endoplasmic reticulum; GO:0005789,endoplasmic reticulum membrane; GO:0005794,Golgi apparatus; GO:0000139,Golgi membrane; GO:0016021,integral component of membrane; GO:0015297,antiporter activity; GO:0005464,UDP-xylose transmembrane transporter activity; GO:0008643,carbohydrate transport; GO:0015790,UDP-xylose transmembrane transport	K15285: SLC35E3; solute carrier family 35, member E3	At1g06890	ref|XP_022995001.1|	UXT1_ARATH,RecName: Full=UDP-xylose transporter 1 {ECO:0000312|EMBL:AKA88212.1};	A0A1S3CKG4_CUCME,SubName: Full=uncharacterized membrane protein At1g06890 {ECO:0000313|RefSeq:XP_008463953.1};
Cla008736	1.49	0	0	0	GO:0005634,nucleus; GO:0003677,DNA binding; GO:0009734,auxin-activated signaling pathway; GO:0006355,regulation of transcription, DNA-templated; GO:0006351,transcription, DNA-templated	--	At2g28350	ref|XP_008463952.1|	ARFR_ORYSJ,RecName: Full=Auxin response factor 18; AltName: Full=OsARF10;	A0A1S3CLX8_CUCME,RecName: Full=Auxin response factor {ECO:0000256|RuleBase:RU004561};
Cla008770	-1.063	0	0	0	--	K19042: BOI; E3 ubiquitin-protein ligase BOI and related proteins [EC:2.3.2.27]	--	ref|XP_008448752.1|	--	A0A1S3BL24_CUCME,SubName: Full=probable BOI-related E3 ubiquitin-protein ligase 3 {ECO:0000313|RefSeq:XP_008448752.1};
Cla008809	0	0	0	-1.053	--	--	--	--	--	--
Cla008810	0	1.77	0	0	--	--	--	ref|XP_008449165.1|	--	A0A1S3BMC4_CUCME,SubName: Full=glycine-rich cell wall structural protein 1.8-like {ECO:0000313|RefSeq:XP_008449165.1};
Cla008842	1.14	0	0	0	GO:0005777,peroxisome; GO:0005524,ATP binding; GO:0004631,phosphomevalonate kinase activity; GO:0019287,isopentenyl diphosphate biosynthetic process, mevalonate pathway; GO:0016126,sterol biosynthetic process	K00938: E2.7.4.2, mvaK2; phosphomevalonate kinase [EC:2.7.4.2]	At1g31910	gb|AEM42973.1|	PMK_ARATH,RecName: Full=Phosphomevalonate kinase, peroxisomal {ECO:0000305}; EC=2.7.4.2 {ECO:0000305}; AltName: Full=5-phosphomevalonate kinase {ECO:0000303|PubMed:21655959}; Short=AtPMK {ECO:0000303|PubMed:21655959};	K7NBK6_SIRGR,SubName: Full=Phosphomevalonate kinase {ECO:0000313|EMBL:AEM42973.1}; EC=2.7.4.2 {ECO:0000313|EMBL:AEM42973.1};
Cla008859	-1.273	0	0	0	GO:0009507,chloroplast; GO:0009535,chloroplast thylakoid membrane; GO:0016021,integral component of membrane; GO:0009523,photosystem II; GO:0015979,photosynthesis	--	At4g19100	ref|XP_008448604.1|	PAM68_ARATH,RecName: Full=Protein PAM68, chloroplastic; AltName: Full=PHOTOSYNTHESIS AFFECTED MUTANT 68; Flags: Precursor;	A0A1S3BKQ0_CUCME,SubName: Full=protein PAM68, chloroplastic isoform X1 {ECO:0000313|RefSeq:XP_008448604.1};
Cla008868	0	0	0	-1.253	--	--	At5g57510	gb|KGN55687.1|	--	A0A0A0L4Z8_CUCSA,SubName: Full=Uncharacterized protein {ECO:0000313|EMBL:KGN55687.1};
Cla008875	0	0	0	-1.514	GO:0005887,integral component of plasma membrane; GO:0005886,plasma membrane; GO:0015293,symporter activity; GO:0015204,urea transmembrane transporter activity; GO:0006995,cellular response to nitrogen starvation; GO:0071918,urea transmembrane transport	K20989: DUR3; urea-proton symporter	At5g45380	ref|XP_008448582.1|	DUR3_ARATH,RecName: Full=Urea-proton symporter DUR3; Short=AtDUR3; AltName: Full=High-affinity urea active transporter DUR3;	A0A1S3BKN1_CUCME,SubName: Full=urea-proton symporter DUR3 {ECO:0000313|RefSeq:XP_008448582.1};
Cla008907	0	0	1.129	1.138	GO:0016021,integral component of membrane; GO:0005622,intracellular; GO:0005886,plasma membrane; GO:0009927,histidine phosphotransfer kinase activity; GO:0005034,osmosensor activity; GO:0000155,phosphorelay sensor kinase activity; GO:0009738,abscisic acid-activated signaling pathway; GO:0006970,response to osmotic stress; GO:0009414,response to water deprivation; GO:0010431,seed maturation; GO:00…	--	At2g17820	ref|XP_011650283.1|	AHK1_ARATH,RecName: Full=Histidine kinase 1; EC=2.7.13.3; AltName: Full=Arabidopsis histidine kinase 1; Short=AtHK1; AltName: Full=Protein AUTHENTIC HIS-KINASE 1;	A0A0A0L670_CUCSA,SubName: Full=Uncharacterized protein {ECO:0000313|EMBL:KGN55651.1};
Cla008934	0	1.417	0	0	GO:0016874,ligase activity; GO:0006631,fatty acid metabolic process	--	At2g17650	gb|KGN55619.1|	AAE2_ARATH,RecName: Full=Probable acyl-activating enzyme 2; EC=6.2.1.-; AltName: Full=AMP-binding protein 2; Short=AtAMPBP2;	A0A0A0L3L0_CUCSA,SubName: Full=Uncharacterized protein {ECO:0000313|EMBL:KGN55619.1};
Cla008942	-1.035	0	0	0	--	--	At4g35560	ref|XP_011650254.1|	--	A0A0A0L0Y6_CUCSA,SubName: Full=Uncharacterized protein {ECO:0000313|EMBL:KGN55610.1};
Cla008967	1.13	1.581	0	0	GO:0005618,cell wall; GO:0005576,extracellular region; GO:0045330,aspartyl esterase activity; GO:0004857,enzyme inhibitor activity; GO:0030599,pectinesterase activity; GO:0042545,cell wall modification; GO:0050829,defense response to Gram-negative bacterium; GO:0045490,pectin catabolic process	K01051: E3.1.1.11; pectinesterase [EC:3.1.1.11]	At3g43270	ref|XP_004146188.2|	PME_PRUPE,RecName: Full=Pectinesterase/pectinesterase inhibitor PPE8B; Includes: RecName: Full=Pectinesterase inhibitor PPE8B; AltName: Full=Pectin methylesterase inhibitor PPE8B; Includes: RecName: Full=Pectinesterase PPE8B; Short=PE PPE8B; EC=3.1.1.11; AltName: Full=Pectin methylesterase PPE8B; Flags: Precursor;	A0A0A0L4S0_CUCSA,SubName: Full=Uncharacterized protein {ECO:0000313|EMBL:KGN55582.1};
Cla009079	3.177	0	-1.668	0	--	--	At5g08350	gb|KGN50945.1|	GEML4_ARATH,RecName: Full=GEM-like protein 4;	A0A0A0KMT0_CUCSA,SubName: Full=Uncharacterized protein {ECO:0000313|EMBL:KGN50945.1};
Cla009080	1.764	0	0	0	--	--	At5g23370	ref|XP_008465120.1|	GEML6_ARATH,RecName: Full=GEM-like protein 6;	A0A1S3CN23_CUCME,SubName: Full=GEM-like protein 4 isoform X2 {ECO:0000313|RefSeq:XP_008465120.1};
Cla009096	0	0	0	1.218	GO:0005634,nucleus; GO:0003677,DNA binding; GO:0003700,DNA binding transcription factor activity; GO:0006355,regulation of transcription, DNA-templated; GO:0006351,transcription, DNA-templated	K16221: TCP21, CHE; transcription factor TCP21 (protein CCA1 HIKING EXPEDITION)	At5g23280	ref|XP_004149871.1|	TCP7_ARATH,RecName: Full=Transcription factor TCP7;	A0A0A0KMY3_CUCSA,SubName: Full=Uncharacterized protein {ECO:0000313|EMBL:KGN50938.1};
Cla009112	0	0	0	-2.838	--	--	--	gb|KGN53822.1|	--	A0A0A0KZM0_CUCSA,SubName: Full=Uncharacterized protein {ECO:0000313|EMBL:KGN53822.1};
Cla009118	0	1.393	0	0	GO:0005777,peroxisome; GO:0047760,butyrate-CoA ligase activity; GO:0019605,butyrate metabolic process	K01913: AAE7, ACN1; acetate---CoA ligase [EC:6.2.1.1]	At1g66120	ref|XP_008463169.1|	AAE11_ARATH,RecName: Full=Butyrate--CoA ligase AAE11, peroxisomal; EC=6.2.1.2; AltName: Full=Acyl-activating enzyme 11; AltName: Full=Butyryl-CoA synthetase;	A0A1S3CIM1_CUCME,SubName: Full=butyrate--CoA ligase AAE11, peroxisomal-like {ECO:0000313|RefSeq:XP_008463169.1};
Cla009123	-1.113	0	0	0	--	--	At1g43995	ref|XP_022145060.1|	--	A0A0Q3IV29_BRADI,SubName: Full=Uncharacterized protein {ECO:0000313|EMBL:KQJ89840.1};
Cla009127	-1.17	0	0	0	GO:0005634,nucleus; GO:0003700,DNA binding transcription factor activity; GO:0044212,transcription regulatory region DNA binding; GO:0090603,sieve element differentiation; GO:0090602,sieve element enucleation; GO:0006351,transcription, DNA-templated	--	At1g65910	ref|XP_004148915.1|	NAC45_ARATH,RecName: Full=NAC domain-containing protein 45 {ECO:0000312|EMBL:AEE73912.1};	A0A0A0KPW3_CUCSA,SubName: Full=Uncharacterized protein {ECO:0000313|EMBL:KGN50914.1};
Cla009130	-1.222	0	0	0	GO:0005634,nucleus; GO:0003677,DNA binding; GO:0003700,DNA binding transcription factor activity; GO:0009851,auxin biosynthetic process; GO:0009734,auxin-activated signaling pathway; GO:0007623,circadian rhythm; GO:0010600,regulation of auxin biosynthetic process; GO:0006355,regulation of transcription, DNA-templated; GO:0006351,transcription, DNA-templated	--	At5g17300	ref|XP_011655141.1|	RVE1_ARATH,RecName: Full=Protein REVEILLE 1;	A0A0A0KPX5_CUCSA,SubName: Full=Uncharacterized protein {ECO:0000313|EMBL:KGN50924.1};
Cla009141	-1.296	0	0	0	GO:0005886,plasma membrane; GO:0016208,AMP binding; GO:0006950,response to stress	--	At3g03270	ref|XP_008463151.1|	USPAL_ARATH,RecName: Full=Universal stress protein A-like protein;	A0A1S3CIK6_CUCME,SubName: Full=universal stress protein A-like protein {ECO:0000313|RefSeq:XP_008463151.1};
Cla009145	1.031	0	0	0	GO:0005829,cytosol; GO:0012505,endomembrane system; GO:0000145,exocyst; GO:0070062,extracellular exosome; GO:0045335,phagocytic vesicle; GO:0005886,plasma membrane; GO:0042742,defense response to bacterium; GO:0050832,defense response to fungus; GO:0006887,exocytosis; GO:0009789,positive regulation of abscisic acid-activated signaling pathway; GO:0090333,regulation of stomatal closure; GO:0009414…	K07195: EXOC7, EXO70; exocyst complex component 7	At5g13990	ref|XP_008463155.1|	E70B1_ARATH,RecName: Full=Exocyst complex component EXO70B1 {ECO:0000303|PubMed:23944713}; Short=AtExo70b1 {ECO:0000303|PubMed:23944713}; AltName: Full=Exocyst subunit Exo70 family protein B1 {ECO:0000303|PubMed:23944713};	A0A1S3CIJ5_CUCME,SubName: Full=exocyst complex component EXO70B1 {ECO:0000313|RefSeq:XP_008463155.1};
Cla009156	0	1.564	0	0	GO:0005634,nucleus; GO:0001046,core promoter sequence-specific DNA binding; GO:0003700,DNA binding transcription factor activity; GO:0000981,RNA polymerase II transcription factor activity, sequence-specific DNA binding; GO:0043565,sequence-specific DNA binding; GO:0001135,transcription factor activity, RNA polymerase II transcription factor recruiting; GO:0044212,transcription regulatory region …	K09422: MYBP; transcription factor MYB, plant	At1g66230	ref|XP_004140299.1|	MYB20_ARATH,RecName: Full=Transcription factor MYB20 {ECO:0000305}; AltName: Full=Myb-related protein 20 {ECO:0000303|PubMed:16463103}; Short=AtMYB20 {ECO:0000303|PubMed:11597504};	A0A0A0KRP9_CUCSA,SubName: Full=Uncharacterized protein {ECO:0000313|EMBL:KGN51062.1};
Cla009165	1.096	0	-1.895	0	GO:0005794,Golgi apparatus; GO:0032580,Golgi cisterna membrane; GO:0016021,integral component of membrane; GO:0050373,UDP-arabinose 4-epimerase activity; GO:0003978,UDP-glucose 4-epimerase activity; GO:0019567,arabinose biosynthetic process; GO:0045227,capsule polysaccharide biosynthetic process; GO:0006012,galactose metabolic process; GO:0009832,plant-type cell wall biogenesis; GO:0033358,UDP-L-…	K12448: UXE, uxe; UDP-arabinose 4-epimerase [EC:5.1.3.5]	At1g30620	ref|XP_008459120.1|	ARAE1_ARATH,RecName: Full=UDP-arabinose 4-epimerase 1; EC=5.1.3.5; AltName: Full=UDP-D-xylose 4-epimerase 1;	A0A1S3CA02_CUCME,SubName: Full=UDP-arabinose 4-epimerase 1-like {ECO:0000313|RefSeq:XP_008459120.1, ECO:0000313|RefSeq:XP_008459121.1, ECO:0000313|RefSeq:XP_016902341.1};
Cla009184	1.11	0	0	0	GO:0004842,ubiquitin-protein transferase activity; GO:0009877,nodulation	--	--	ref|XP_004145484.2|	LIN2_LOTJA,RecName: Full=Putative E3 ubiquitin-protein ligase LIN-2 {ECO:0000303|PubMed:19776163}; Short=LjLIN {ECO:0000303|PubMed:19776163}; EC=2.3.2.27 {ECO:0000303|PubMed:19776163}; AltName: Full=RING-type E3 ubiquitin transferase LIN-2 {ECO:0000305};	A0A0A0LYR5_CUCSA,SubName: Full=Uncharacterized protein {ECO:0000313|EMBL:KGN66908.1};
Cla009287	0	1.652	0	0	--	--	--	gb|KGN47422.1|	--	A0A0A0KG95_CUCSA,SubName: Full=Uncharacterized protein {ECO:0000313|EMBL:KGN47422.1};
Cla009289	-2.064	0	0	0	GO:0016021,integral component of membrane; GO:0046872,metal ion binding; GO:0061630,ubiquitin protein ligase activity; GO:0006952,defense response; GO:0043161,proteasome-mediated ubiquitin-dependent protein catabolic process; GO:0010200,response to chitin	--	At3g16720	ref|XP_008458410.1|	ATL2_ARATH,RecName: Full=RING-H2 finger protein ATL2; EC=2.3.2.27 {ECO:0000305}; AltName: Full=Protein ARABIDOPSIS TOXICOS EN LEVADURA 2; Short=Protein ATL2; AltName: Full=RING-type E3 ubiquitin transferase ATL2 {ECO:0000305};	A0A1S3C7X4_CUCME,SubName: Full=RING-H2 finger protein ATL2-like {ECO:0000313|RefSeq:XP_008458410.1};
Cla009292	-3.363	0	0	0	--	--	At5g49120	ref|XP_023000009.1|	--	A0A1S3C923_CUCME,SubName: Full=uncharacterized protein DDB_G0271670 isoform X1 {ECO:0000313|RefSeq:XP_008458414.1};
Cla009305	1.214	0	0	0	GO:0048046,apoplast; GO:0005622,intracellular; GO:0009505,plant-type cell wall; GO:0009506,plasmodesma; GO:0005179,hormone activity; GO:0004871,signal transducer activity; GO:0019722,calcium-mediated signaling; GO:0007267,cell-cell signaling	--	At3g16570	ref|XP_023547686.1|	RLF33_ARATH,RecName: Full=Protein RALF-like 33; Flags: Precursor;	A0A1S3C7V8_CUCME,SubName: Full=protein RALF-like 33 {ECO:0000313|RefSeq:XP_008458453.1};
Cla009342	1.015	0	0	0	--	--	--	gb|KGN46184.1|	--	A0A0A0KBF3_CUCSA,SubName: Full=Uncharacterized protein {ECO:0000313|EMBL:KGN46184.1};
Cla009388	0	0	0	-1.325	--	--	At5g19260	gb|KGN48025.1|	FAF3_ARATH,RecName: Full=Protein FANTASTIC FOUR 3;	A0A0A0KEE1_CUCSA,SubName: Full=Uncharacterized protein {ECO:0000313|EMBL:KGN48025.1};
Cla009403	-1.542	0	0	0	--	K07025: K07025; putative hydrolase of the HAD superfamily	At2g32150	ref|XP_004140145.1|	--	A0A0A0KEU0_CUCSA,SubName: Full=Uncharacterized protein {ECO:0000313|EMBL:KGN48008.1};
Cla009619	0	0	1.002	0	GO:0005783,endoplasmic reticulum; GO:0005789,endoplasmic reticulum membrane; GO:0005794,Golgi apparatus; GO:0000139,Golgi membrane; GO:0005524,ATP binding; GO:0016874,ligase activity; GO:0061630,ubiquitin protein ligase activity; GO:0031625,ubiquitin protein ligase binding; GO:0044257,cellular protein catabolic process; GO:0016036,cellular response to phosphate starvation; GO:0055062,phosphate io…	K10581: UBE2O; ubiquitin-conjugating enzyme E2 O [EC:2.3.2.24]	At2g16920	gb|KGN49227.1|	UBC24_ARATH,RecName: Full=Probable ubiquitin-conjugating enzyme E2 24 {ECO:0000303|PubMed:16339806}; EC=2.3.2.23 {ECO:0000305}; AltName: Full=AtPHO2 {ECO:0000303|PubMed:16679424}; AltName: Full=E2 ubiquitin-conjugating enzyme 24 {ECO:0000303|PubMed:16339806}; AltName: Full=Ubiquitin carrier protein 24 {ECO:0000303|PubMed:16339806}; AltName: Full=Ubiquitin-protein ligase 24 {ECO:0000303|PubMed:163…	A0A0A0KLH0_CUCSA,SubName: Full=Uncharacterized protein {ECO:0000313|EMBL:KGN49227.1};
Cla009629	0	0	1.581	0	GO:0005634,nucleus; GO:0003677,DNA binding; GO:0003700,DNA binding transcription factor activity; GO:0046872,metal ion binding; GO:0009908,flower development; GO:0006351,transcription, DNA-templated	--	At2g33810	ref|XP_004134953.1|	SBP1_ANTMA,RecName: Full=Squamosa promoter-binding protein 1;	A0A0A0KK74_CUCSA,SubName: Full=Uncharacterized protein {ECO:0000313|EMBL:KGN49239.1};
Cla009633	-1.263	0	0	0	GO:0009734,auxin-activated signaling pathway	--	At1g28330	dbj|BAI52956.1|	12KD_FRAAN,RecName: Full=Auxin-repressed 12.5 kDa protein;	D1MWZ6_CITLA,SubName: Full=Auxin-repressed protein {ECO:0000313|EMBL:BAI52956.1};
Cla009635	-1.321	0	0	0	GO:0005634,nucleus; GO:0003677,DNA binding; GO:0003700,DNA binding transcription factor activity; GO:0006952,defense response; GO:0009873,ethylene-activated signaling pathway; GO:0006351,transcription, DNA-templated	K09286: EREBP; EREBP-like factor	At5g44210	ref|NP_001267525.1|	ERF4_NICSY,RecName: Full=Ethylene-responsive transcription factor 4; AltName: Full=Ethylene-responsive element-binding factor 3; Short=EREBP-3; AltName: Full=Ethylene-responsive element-binding factor 4 homolog; AltName: Full=NsERF3;	Q5S004_CUCSA,SubName: Full=Ethylene response factor 1 {ECO:0000313|EMBL:AAV66332.1};
Cla009640	1.076	0	0	0	GO:0005618,cell wall; GO:0005576,extracellular region; GO:0090378,seed trichome elongation	--	--	ref|XP_008441080.1|	E6_GOSHI,RecName: Full=Protein E6;	A0A1S3B2M6_CUCME,SubName: Full=protein E6 {ECO:0000313|RefSeq:XP_008441080.1};
Cla009645	0	0	0	-2.374	GO:0005783,endoplasmic reticulum; GO:0016021,integral component of membrane; GO:0009705,plant-type vacuole membrane; GO:0009838,abscission; GO:0010256,endomembrane system organization; GO:0090693,plant organ senescence	--	At5g46090	ref|XP_008439807.1|	DMP4_ARATH,RecName: Full=Protein DMP4 {ECO:0000303|PubMed:20712629}; Short=AtDMP4 {ECO:0000303|PubMed:20712629};	A0A1S3B092_CUCME,SubName: Full=uncharacterized protein LOC103484494 {ECO:0000313|RefSeq:XP_008439807.1};
Cla009647	2.142	0	0	0	GO:0009986,cell surface; GO:0030139,endocytic vesicle; GO:0016021,integral component of membrane; GO:0032585,multivesicular body membrane; GO:0005886,plasma membrane; GO:0005524,ATP binding; GO:0042803,protein homodimerization activity; GO:0004674,protein serine/threonine kinase activity; GO:0019199,transmembrane receptor protein kinase activity; GO:0009793,embryo development ending in seed dorma…	--	At5g46080	ref|XP_004134945.1|	ACR4L_ARATH,RecName: Full=Serine/threonine-protein kinase-like protein ACR4; EC=2.7.11.1; AltName: Full=Protein CRINKLY 4; Short=AtCR4; Flags: Precursor;	A0A0A0KNF7_CUCSA,SubName: Full=Uncharacterized protein {ECO:0000313|EMBL:KGN49261.1};
Cla009671	1.764	0	0	0	GO:0016410,N-acyltransferase activity; GO:0080073,spermidine:coumaroyl CoA N-acyltransferase activity; GO:0006596,polyamine biosynthetic process; GO:0008216,spermidine metabolic process	K20240: SCT; spermidine dicoumaroyl transferase [EC:2.3.1.249]	At1g28680	ref|XP_023543910.1|	SCT_ARATH,RecName: Full=Spermidine coumaroyl-CoA acyltransferase {ECO:0000303|PubMed:19168716}; Short=SCT {ECO:0000303|PubMed:19168716}; Short=Spermidine dicoumaroyl transferase {ECO:0000303|PubMed:19168716}; EC=2.3.1.249 {ECO:0000269|PubMed:19168716};	A0A0A0KKB2_CUCSA,SubName: Full=Uncharacterized protein {ECO:0000313|EMBL:KGN49284.1};
Cla009672	1.11	0	0	0	--	--	--	ref|XP_011658243.1|	--	A0A1S3B088_CUCME,SubName: Full=uncharacterized protein At4g18490 {ECO:0000313|RefSeq:XP_008439766.1};
Cla009733	-1.01	0	-1.301	-1.45	GO:0016021,integral component of membrane; GO:0005524,ATP binding; GO:0042626,ATPase activity, coupled to transmembrane movement of substances	K05658: ABCB1, CD243; ATP-binding cassette, subfamily B (MDR/TAP), member 1 [EC:3.6.3.44]	At4g18050	ref|XP_008439691.1|	AB9B_ARATH,RecName: Full=ABC transporter B family member 9; Short=ABC transporter ABCB.9; Short=AtABCB9; AltName: Full=Multidrug resistance protein 9; AltName: Full=P-glycoprotein 9;	A0A1S3B020_CUCME,SubName: Full=ABC transporter B family member 9 {ECO:0000313|RefSeq:XP_008439691.1};
Cla009735	-1.229	0	0	0	--	--	At1g29520	ref|XP_004134640.1|	--	A0A0A0KNQ2_CUCSA,SubName: Full=Uncharacterized protein {ECO:0000313|EMBL:KGN49356.1};
Cla009766	1.763	0	0	0	GO:0016021,integral component of membrane; GO:0020037,heme binding; GO:0005506,iron ion binding; GO:0004497,monooxygenase activity; GO:0016705,oxidoreductase activity, acting on paired donors, with incorporation or reduction of molecular oxygen; GO:0016126,sterol biosynthetic process	K09832: CYP710A; sterol 22-desaturase [EC:1.14.19.41]	At2g34500	ref|XP_008439643.1|	C7111_SOLLC,RecName: Full=Cytochrome P450 710A11 {ECO:0000303|PubMed:16531502}; EC=1.14.19.41 {ECO:0000269|PubMed:16531502}; AltName: Full=C-22 sterol desaturase {ECO:0000303|PubMed:16531502};	A0A1S3AZ91_CUCME,SubName: Full=cytochrome P450 710A11-like {ECO:0000313|RefSeq:XP_008439643.1};
Cla009773	-1.062	0	0	0	--	--	At2g34530	ref|XP_004134647.2|	--	A0A0A0KLZ3_CUCSA,SubName: Full=Uncharacterized protein {ECO:0000313|EMBL:KGN49397.1};
Cla009774	0	0	0	-3.569	GO:0045543,gibberellin 2-beta-dioxygenase activity; GO:0046872,metal ion binding; GO:0009686,gibberellin biosynthetic process	K04125: E1.14.11.13; gibberellin 2beta-dioxygenase [EC:1.14.11.13]	At1g30040	ref|XP_008439633.1|	G2OX_PHACN,RecName: Full=Gibberellin 2-beta-dioxygenase; EC=1.14.11.13; AltName: Full=GA 2-oxidase; AltName: Full=Gibberellin 2-beta-hydroxylase; AltName: Full=Gibberellin 2-oxidase;	A0A1S3AZ81_CUCME,SubName: Full=gibberellin 2-beta-dioxygenase-like {ECO:0000313|RefSeq:XP_008439633.1};
Cla009776	0	1.712	0	0	GO:0031225,anchored component of membrane; GO:0046658,anchored component of plasma membrane; GO:0005576,extracellular region; GO:0009505,plant-type cell wall; GO:0005886,plasma membrane; GO:0042973,glucan endo-1,3-beta-D-glucosidase activity; GO:0030247,polysaccharide binding; GO:0005975,carbohydrate metabolic process; GO:0007154,cell communication; GO:0071555,cell wall organization; GO:0006952,d…	K19891: GN1_2_3; glucan endo-1,3-beta-glucosidase 1/2/3 [EC:3.2.1.39]	At1g30080	ref|XP_008439627.1|	E1311_ARATH,RecName: Full=Glucan endo-1,3-beta-glucosidase 11; EC=3.2.1.39; AltName: Full=(1->3)-beta-glucan endohydrolase 11; Short=(1->3)-beta-glucanase 11; AltName: Full=Beta-1,3-endoglucanase 11; Short=Beta-1,3-glucanase 11; Flags: Precursor;	A0A1S3AYS7_CUCME,SubName: Full=glucan endo-1,3-beta-glucosidase 11-like isoform X1 {ECO:0000313|RefSeq:XP_008439627.1};
Cla009812	0	0	0	-1.649	GO:0070531,BRCA1-A complex; GO:0031436,BRCA1-BARD1 complex; GO:0005634,nucleus; GO:0005886,plasma membrane; GO:0046872,metal ion binding; GO:0004842,ubiquitin-protein transferase activity; GO:0071480,cellular response to gamma radiation; GO:0006310,DNA recombination; GO:0006281,DNA repair; GO:0000724,double-strand break repair via homologous recombination; GO:0045717,negative regulation of fatty …	K10683: BARD1; BRCA1-associated RING domain protein 1	At4g21070_2	ref|XP_004134902.1|	BRCA1_ARATH,RecName: Full=Protein BREAST CANCER SUSCEPTIBILITY 1 homolog {ECO:0000303|PubMed:12582233}; Short=AtBRCA1 {ECO:0000303|PubMed:12582233};	A0A0A0KI90_CUCSA,SubName: Full=Uncharacterized protein {ECO:0000313|EMBL:KGN49445.1};
Cla009817	0	0	0	-1.459	--	--	--	--	--	--
Cla009818	0	0	0	-1.443	GO:0016021,integral component of membrane; GO:0000325,plant-type vacuole; GO:0005774,vacuolar membrane; GO:0005524,ATP binding; GO:0042626,ATPase activity, coupled to transmembrane movement of substances; GO:0008559,xenobiotic transmembrane transporting ATPase activity; GO:0055085,transmembrane transport	K05666: ABCC2; ATP-binding cassette, subfamily C (CFTR/MRP), member 2	At1g30410	ref|XP_008439567.1|	AB12C_ARATH,RecName: Full=ABC transporter C family member 12; Short=ABC transporter ABCC.12; Short=AtABCC12; EC=3.6.3.44; AltName: Full=ATP-energized glutathione S-conjugate pump 13; AltName: Full=Glutathione S-conjugate-transporting ATPase 13; AltName: Full=Multidrug resistance-associated protein 13;	A0A1S3AYM9_CUCME,SubName: Full=ABC transporter C family member 12-like {ECO:0000313|RefSeq:XP_008439567.1, ECO:0000313|RefSeq:XP_008439568.1, ECO:0000313|RefSeq:XP_008439569.1};
Cla009848	0	-1.302	0	0	GO:0005618,cell wall; GO:0005576,extracellular region; GO:0050660,flavin adenine dinucleotide binding; GO:0016614,oxidoreductase activity, acting on CH-OH group of donors	K22395: K22395; cinnamyl-alcohol dehydrogenase [EC:1.1.1.195]	At1g34570	ref|XP_004134894.1|	BBE14_ARATH,RecName: Full=Berberine bridge enzyme-like 14 {ECO:0000303|PubMed:26037923}; Short=AtBBE-like 14 {ECO:0000303|PubMed:26037923}; EC=1.1.1.- {ECO:0000250|UniProtKB:O64743}; Flags: Precursor;	A0A1S3AYX7_CUCME,SubName: Full=flavin-dependent oxidoreductase FOX2-like {ECO:0000313|RefSeq:XP_008439524.1};
Cla009870	0	0	-1.61	0	GO:0005618,cell wall; GO:0005576,extracellular region; GO:0004650,polygalacturonase activity; GO:0071555,cell wall organization; GO:0008152,metabolic process; GO:0009556,microsporogenesis; GO:0010584,pollen exine formation	--	At4g20050	ref|XP_004134539.1|	QRT3_ARATH,RecName: Full=Polygalacturonase QRT3; Short=AtQRT3; Short=PG QRT3; EC=3.2.1.15; AltName: Full=Pectinase QRT3; AltName: Full=Protein QUARTET 3; Flags: Precursor;	A0A0A0KMC1_CUCSA,SubName: Full=Uncharacterized protein {ECO:0000313|EMBL:KGN49507.1};
Cla009871	0	0	0	-1.012	GO:0016021,integral component of membrane; GO:0046872,metal ion binding; GO:0061630,ubiquitin protein ligase activity; GO:0004842,ubiquitin-protein transferase activity; GO:0009901,anther dehiscence; GO:0009555,pollen development; GO:0043161,proteasome-mediated ubiquitin-dependent protein catabolic process; GO:0016567,protein ubiquitination; GO:0080141,regulation of jasmonic acid biosynthetic pro…	--	At5g05280	ref|XP_004134885.2|	ATL73_ARATH,RecName: Full=RING-H2 finger protein ATL73; EC=2.3.2.27 {ECO:0000305}; AltName: Full=RING-type E3 ubiquitin transferase ATL73 {ECO:0000305}; Flags: Precursor;	A0A0A0KJ24_CUCSA,SubName: Full=Uncharacterized protein {ECO:0000313|EMBL:KGN49508.1};
Cla009872	-2.106	0	0	0	--	--	--	ref|XP_008441071.1|	--	A0A1S3B3C3_CUCME,SubName: Full=uncharacterized protein LOC103485295 {ECO:0000313|RefSeq:XP_008441071.1};
Cla009883	5.772	0	0	0	GO:0005634,nucleus; GO:0003700,DNA binding transcription factor activity; GO:0046983,protein dimerization activity; GO:0000977,RNA polymerase II regulatory region sequence-specific DNA binding; GO:0045944,positive regulation of transcription by RNA polymerase II; GO:0048316,seed development; GO:0006351,transcription, DNA-templated	--	At5g23260	ref|XP_011658353.1|	FBP24_PETHY,RecName: Full=MADS-box protein FBP24; AltName: Full=Floral-binding protein 24;	A0A1S3AYU5_CUCME,SubName: Full=MADS-box protein FBP24 {ECO:0000313|RefSeq:XP_008439464.1};
Cla009897	0	0	0	-1.297	--	K01514: PRUNE, PPX1; exopolyphosphatase [EC:3.6.1.11]	Hs20532969	ref|XP_011658367.1|	--	A0A0A0KMD3_CUCSA,SubName: Full=Uncharacterized protein {ECO:0000313|EMBL:KGN49532.1};
Cla009915	1.493	0	0	0	--	K01937: pyrG, CTPS; CTP synthase [EC:6.3.4.2]	At1g30820	ref|XP_008439409.1|	--	A0A0A0KPE2_CUCSA,RecName: Full=CTP synthase {ECO:0000256|RuleBase:RU810713}; EC=6.3.4.2 {ECO:0000256|RuleBase:RU810713}; AltName: Full=UTP--ammonia ligase {ECO:0000256|RuleBase:RU810713};
Cla009928	0	1.218	0	0	GO:0009507,chloroplast; GO:0005634,nucleus; GO:0071482,cellular response to light stimulus; GO:0009816,defense response to bacterium, incompatible interaction; GO:0051091,positive regulation of DNA binding transcription factor activity	--	At3g56710	dbj|BAI52954.1|	SIB1_ARATH,RecName: Full=Sigma factor binding protein 1, chloroplastic; Short=AtsibI; Short=Sigma factor binding protein I; AltName: Full=SigA binding protein; AltName: Full=VQ motif-containing protein 23 {ECO:0000303|PubMed:22535423}; Short=AtVQ23 {ECO:0000303|PubMed:22535423}; Flags: Precursor;	D1MWZ4_CITLA,SubName: Full=Sigma factor binding protein 1 {ECO:0000313|EMBL:BAI52954.1};
Cla010004	1.23	0	0	0	--	--	At1g24480	ref|XP_004135292.1|	--	A0A0A0KVD5_CUCSA,SubName: Full=Uncharacterized protein {ECO:0000313|EMBL:KGN51716.1};
Cla010005	-1.259	0	0	0	GO:0009535,chloroplast thylakoid membrane; GO:0016021,integral component of membrane; GO:0009523,photosystem II; GO:0030145,manganese ion binding; GO:0015979,photosynthesis	K02723: psbY; photosystem II PsbY protein	At1g67740	ref|XP_008446112.1|	PSBY_SPIOL,RecName: Full=Photosystem II core complex proteins psbY, chloroplastic; AltName: Full=L-arginine-metabolizing enzyme; Short=L-AME; Contains: RecName: Full=Photosystem II protein psbY-1, chloroplastic; AltName: Full=psbY-A1; Contains: RecName: Full=Photosystem II protein psbY-2, chloroplastic; AltName: Full=psbY-A2; Flags: Precursor;	A0A1S3BDT7_CUCME,SubName: Full=photosystem II core complex proteins psbY, chloroplastic-like {ECO:0000313|RefSeq:XP_008446112.1};
Cla010037	-2.052	0	0	0	GO:0016021,integral component of membrane; GO:0046872,metal ion binding; GO:0061630,ubiquitin protein ligase activity; GO:0009688,abscisic acid biosynthetic process; GO:0009687,abscisic acid metabolic process; GO:0043161,proteasome-mediated ubiquitin-dependent protein catabolic process; GO:0010200,response to chitin; GO:0009739,response to gibberellin; GO:0006970,response to osmotic stress; GO:00…	K16285: XERICO; RING/U-box domain-containing protein [EC:2.3.2.27]	At2g04240	ref|XP_023523084.1|	XERIC_ARATH,RecName: Full=Probable E3 ubiquitin-protein ligase XERICO; EC=2.3.2.27; AltName: Full=RING-type E3 ubiquitin transferase XERICO;	A0A0A0KTI8_CUCSA,SubName: Full=Uncharacterized protein {ECO:0000313|EMBL:KGN51747.1};
Cla010061	0	0	-1.869	-2.18	--	--	At1g17100	ref|XP_011655613.1|	--	A0A0A0KVJ5_CUCSA,SubName: Full=Uncharacterized protein {ECO:0000313|EMBL:KGN51776.1};
Cla010078	-1.505	0	0	0	GO:0005777,peroxisome; GO:0008935,1,4-dihydroxy-2-naphthoyl-CoA synthase activity; GO:0016853,isomerase activity; GO:0009234,menaquinone biosynthetic process; GO:0042372,phylloquinone biosynthetic process	K01661: menB; naphthoate synthase [EC:4.1.3.36]	At1g60550	ref|XP_022957177.1|	MENB_ARATH,RecName: Full=1,4-dihydroxy-2-naphthoyl-CoA synthase, peroxisomal; Short=DHNS; EC=4.1.3.36; AltName: Full=Enoyl-CoA hydratase/isomerase D; Short=ECHID; AltName: Full=Naphthoate synthase;	A0A1S3BE03_CUCME,SubName: Full=1,4-dihydroxy-2-naphthoyl-CoA synthase, peroxisomal {ECO:0000313|RefSeq:XP_008446199.1};
Cla010086	1.037	0	0	0	GO:0009570,chloroplast stroma; GO:0004089,carbonate dehydratase activity; GO:0008270,zinc ion binding; GO:0015976,carbon utilization	K01673: cynT, can; carbonic anhydrase [EC:4.2.1.1]	At5g14740	ref|XP_008446208.1|	CAHC_TOBAC,RecName: Full=Carbonic anhydrase, chloroplastic; EC=4.2.1.1; AltName: Full=Carbonate dehydratase; Flags: Precursor;	E5GBJ5_CUCME,RecName: Full=Carbonic anhydrase {ECO:0000256|RuleBase:RU003956}; EC=4.2.1.1 {ECO:0000256|RuleBase:RU003956}; AltName: Full=Carbonate dehydratase {ECO:0000256|RuleBase:RU003956};
Cla010107	1.807	0	0	0	GO:0016020,membrane; GO:0006952,defense response; GO:0009607,response to biotic stimulus	--	At1g24020	ref|XP_023553168.1|	ML423_ARATH,RecName: Full=MLP-like protein 423;	A0A0A0KTR8_CUCSA,SubName: Full=Major latex-like protein {ECO:0000313|EMBL:KGN51827.1};
Cla010122	0	0	0	-1.535	GO:0005737,cytoplasm; GO:0005634,nucleus; GO:0000156,phosphorelay response regulator activity; GO:0004674,protein serine/threonine kinase activity; GO:0007623,circadian rhythm; GO:0009736,cytokinin-activated signaling pathway; GO:0009793,embryo development ending in seed dormancy; GO:0046777,protein autophosphorylation; GO:0010017,red or far-red light signaling pathway; GO:0006355,regulation of t…	--	At1g10470	ref|XP_004135221.1|	ARR4_ARATH,RecName: Full=Two-component response regulator ARR4; AltName: Full=Response regulator 1;	A0A0A0KQC9_CUCSA,SubName: Full=Uncharacterized protein {ECO:0000313|EMBL:KGN51845.1};
Cla010144	0	0	0	-3.64	GO:0005737,cytoplasm; GO:0016671,oxidoreductase activity, acting on a sulfur group of donors, disulfide as acceptor; GO:0015035,protein disulfide oxidoreductase activity; GO:0047134,protein-disulfide reductase activity; GO:0004791,thioredoxin-disulfide reductase activity; GO:0045454,cell redox homeostasis; GO:0034599,cellular response to oxidative stress; GO:0006662,glycerol ether metabolic proce…	K03671: trxA; thioredoxin 1	At5g39950	ref|XP_004135204.1|	TRH21_ORYSJ,RecName: Full=Thioredoxin H2-1; Short=OsTrxh2-1; AltName: Full=OsTrx24;	A0A0A0KQG0_CUCSA,RecName: Full=Thioredoxin {ECO:0000256|PIRNR:PIRNR000077};
Cla010165	0	-1.769	0	0	GO:0016021,integral component of membrane; GO:0005524,ATP binding; GO:0004674,protein serine/threonine kinase activity	--	At1g14390	ref|XP_004135190.1|	Y1143_ARATH,RecName: Full=Probable LRR receptor-like serine/threonine-protein kinase At1g14390; EC=2.7.11.1; Flags: Precursor;	A0A0A0KSM1_CUCSA,SubName: Full=Uncharacterized protein {ECO:0000313|EMBL:KGN51894.1};
Cla010176	-1.372	0	0	0	--	--	--	ref|XP_008446337.1|	--	A0A1S3BFM6_CUCME,SubName: Full=transcription factor TCP15 {ECO:0000313|RefSeq:XP_008446337.1};
Cla010184	-1.806	0	0	-2.171	GO:0005634,nucleus; GO:0003677,DNA binding; GO:0003700,DNA binding transcription factor activity; GO:0046872,metal ion binding; GO:0042803,protein homodimerization activity; GO:0045893,positive regulation of transcription, DNA-templated; GO:0009414,response to water deprivation; GO:0006351,transcription, DNA-templated	--	At1g69600	ref|XP_004135457.1|	ZHD11_ARATH,RecName: Full=Zinc-finger homeodomain protein 11; Short=AtZHD11; AltName: Full=Transcription factor HB29; Short=AtHB-29; AltName: Full=Zinc finger homeodomain transcription factor 1;	A0A0A0KSP2_CUCSA,SubName: Full=ZF-HD homeobox domain-containing protein {ECO:0000313|EMBL:KGN51914.1};
Cla010192	-1.052	0	0	0	GO:0005634,nucleus; GO:0003700,DNA binding transcription factor activity; GO:0046872,metal ion binding; GO:0043565,sequence-specific DNA binding; GO:0009908,flower development; GO:0006355,regulation of transcription, DNA-templated; GO:0006351,transcription, DNA-templated	--	At5g39660	ref|XP_011655685.1|	CDF2_ARATH,RecName: Full=Cyclic dof factor 2; AltName: Full=Dof zinc finger protein DOF5.2; Short=AtDOF5.2;	A0A0A0KSR0_CUCSA,SubName: Full=Uncharacterized protein {ECO:0000313|EMBL:KGN51929.1};
Cla010196	1.046	0	0	0	GO:0005618,cell wall; GO:0005576,extracellular region; GO:0016020,membrane; GO:0009664,plant-type cell wall organization	--	At1g69530	ref|XP_008446373.1|	EXPA1_ARATH,RecName: Full=Expansin-A1; Short=AtEXPA1; AltName: Full=Alpha-expansin-1; Short=At-EXP1; Short=AtEx1; AltName: Full=Ath-ExpAlpha-1.2; Flags: Precursor;	A0A1S3BEF0_CUCME,SubName: Full=expansin-A1 {ECO:0000313|RefSeq:XP_008446373.1};
Cla010201	-2.36	0	1.256	0	GO:0005634,nucleus; GO:0003677,DNA binding; GO:0003700,DNA binding transcription factor activity; GO:0009793,embryo development ending in seed dormancy; GO:0009908,flower development; GO:0009835,fruit ripening; GO:0010150,leaf senescence; GO:0009825,multidimensional cell growth; GO:0006351,transcription, DNA-templated	--	At1g69490	ref|XP_004135168.1|	NAC29_ARATH,RecName: Full=NAC transcription factor 29; Short=AtNAC029; AltName: Full=Protein NAC-LIKE, ACTIVATED BY AP3/PI; Short=AtNAP;	A0A0A0KSS1_CUCSA,SubName: Full=Uncharacterized protein {ECO:0000313|EMBL:KGN51939.1};
Cla010230	-1.39	0	0	0	--	--	--	ref|XP_008446424.1|	--	A0A1S3BFQ3_CUCME,SubName: Full=uncharacterized protein LOC103489174 {ECO:0000313|RefSeq:XP_008446424.1};
Cla010284	-1.378	0	0	0	--	--	--	gb|KGN61756.1|	--	A0A0A0LP24_CUCSA,SubName: Full=Uncharacterized protein {ECO:0000313|EMBL:KGN61756.1};
Cla010291	0	0	0	-1.148	GO:0016021,integral component of membrane; GO:0046872,metal ion binding; GO:0061630,ubiquitin protein ligase activity; GO:0043161,proteasome-mediated ubiquitin-dependent protein catabolic process	--	At3g18930	ref|XP_023511773.1|	ATL65_ARATH,RecName: Full=RING-H2 finger protein ATL65; EC=2.3.2.27 {ECO:0000305}; AltName: Full=RING-type E3 ubiquitin transferase ATL65 {ECO:0000305};	A0A0A0LIL3_CUCSA,SubName: Full=Uncharacterized protein {ECO:0000313|EMBL:KGN61760.1};
Cla010297	1.033	0	0	0	GO:0009507,chloroplast; GO:0009570,chloroplast stroma; GO:0051538,3 iron, 4 sulfur cluster binding; GO:0051745,4-hydroxy-3-methylbut-2-en-1-yl diphosphate reductase activity; GO:0046429,4-hydroxy-3-methylbut-2-en-1-yl diphosphate synthase activity; GO:0046872,metal ion binding; GO:0050992,dimethylallyl diphosphate biosynthetic process; GO:0019288,isopentenyl diphosphate biosynthetic process, meth…	K03527: ispH, lytB; 4-hydroxy-3-methylbut-2-en-1-yl diphosphate reductase [EC:1.17.7.4]	At4g34350	gb|KGN61768.1|	ISPH_ARATH,RecName: Full=4-hydroxy-3-methylbut-2-enyl diphosphate reductase, chloroplastic; EC=1.17.7.4; AltName: Full=Protein CHLOROPLAST BIOGENESIS 6; Flags: Precursor;	A0A0A0LIX0_CUCSA,SubName: Full=Uncharacterized protein {ECO:0000313|EMBL:KGN61768.1};
Cla010301	-1.519	0	0	0	--	--	At2g23690	ref|XP_022148561.1|	--	A0A0A0LIX5_CUCSA,SubName: Full=Uncharacterized protein {ECO:0000313|EMBL:KGN61773.1};
Cla010322	0	1.939	0	-1.381	GO:0005509,calcium ion binding	K02183: CALM; calmodulin	At3g29000	ref|XP_008459700.2|	CML30_ARATH,RecName: Full=Probable calcium-binding protein CML30; AltName: Full=Calmodulin-like protein 30;	A0A1S3CAB3_CUCME,SubName: Full=probable calcium-binding protein CML30 {ECO:0000313|RefSeq:XP_008459700.2};
Cla010331	0	0	0	1.093	GO:0005737,cytoplasm; GO:0005634,nucleus; GO:0003677,DNA binding; GO:0046872,metal ion binding; GO:0042803,protein homodimerization activity; GO:0007275,multicellular organism development; GO:0006355,regulation of transcription, DNA-templated; GO:0006351,transcription, DNA-templated	--	At1g74660	ref|XP_016902406.1|	MIF2_ARATH,RecName: Full=Mini zinc finger protein 2; Short=AtMIF2;	A0A1S4E2E9_CUCME,SubName: Full=mini zinc finger protein 2 {ECO:0000313|RefSeq:XP_016902406.1};
Cla010394	0	0	-1.544	0	GO:0016021,integral component of membrane; GO:0005886,plasma membrane; GO:0015079,potassium ion transmembrane transporter activity	K03549: kup; KUP system potassium uptake protein	At5g14880	ref|XP_011655966.1|	POT8_ARATH,RecName: Full=Potassium transporter 8; Short=AtHAK8; Short=AtPOT8;	A0A0A0KX45_CUCSA,RecName: Full=Potassium transporter {ECO:0000256|RuleBase:RU321113};
Cla010402	0	0	0	-1.583	GO:0005576,extracellular region; GO:0016788,hydrolase activity, acting on ester bonds; GO:0016042,lipid catabolic process	K01206: FUCA; alpha-L-fucosidase [EC:3.2.1.51]	At3g27950	ref|XP_008458758.1|	GDL54_ARATH,RecName: Full=GDSL esterase/lipase At3g27950; EC=3.1.1.-; AltName: Full=Extracellular lipase At3g27950; Flags: Precursor;	A0A1S3C849_CUCME,SubName: Full=GDSL esterase/lipase At3g27950-like {ECO:0000313|RefSeq:XP_008458758.1};
Cla010408	0	1.032	0	0	GO:0003854,3-beta-hydroxy-delta5-steroid dehydrogenase activity; GO:0042742,defense response to bacterium; GO:0009809,lignin biosynthetic process; GO:0006694,steroid biosynthetic process	--	At5g14700	ref|XP_022938554.1|	SNL6_ORYSJ,RecName: Full=Cinnamoyl-CoA reductase-like SNL6 {ECO:0000305}; EC=1.2.-.- {ECO:0000305}; AltName: Full=Protein SUPPRESSOR OF NH1-MEDIATED LESION 6 {ECO:0000303|PubMed:20862311};	A0A1S3C8R4_CUCME,SubName: Full=cinnamoyl-CoA reductase 1-like {ECO:0000313|RefSeq:XP_008458771.1};
Cla010409	1.079	0	0	0	--	--	--	ref|XP_008458773.1|	--	A0A1S3C8M3_CUCME,SubName: Full=uncharacterized protein LOC103498078 {ECO:0000313|RefSeq:XP_008458773.1, ECO:0000313|RefSeq:XP_008458774.1};
Cla010447	-1.514	0	0	0	GO:0005794,Golgi apparatus; GO:0000139,Golgi membrane; GO:0016021,integral component of membrane; GO:0005886,plasma membrane; GO:0016760,cellulose synthase (UDP-forming) activity; GO:0016759,cellulose synthase activity; GO:0071555,cell wall organization; GO:0030244,cellulose biosynthetic process; GO:0009833,plant-type primary cell wall biogenesis	--	At2g32540	ref|XP_008455914.1|	CSLB3_ARATH,RecName: Full=Cellulose synthase-like protein B3; Short=AtCslB3; EC=2.4.1.-;	A0A1S3C1K9_CUCME,SubName: Full=cellulose synthase-like protein H1 isoform X1 {ECO:0000313|RefSeq:XP_008455914.1};
Cla010453	-1.579	0	0	0	GO:0005737,cytoplasm; GO:0005634,nucleus; GO:0005524,ATP binding; GO:0004709,MAP kinase kinase kinase activity; GO:0004674,protein serine/threonine kinase activity; GO:0004702,signal transducer, downstream of receptor, with serine/threonine kinase activity; GO:0009738,abscisic acid-activated signaling pathway; GO:0032147,activation of protein kinase activity; GO:0007346,regulation of mitotic cell…	K20716: MAPKKK17_18; mitogen-activated protein kinase kinase kinase 17/18	At2g32510	ref|XP_008455899.1|	M3K17_ARATH,RecName: Full=Mitogen-activated protein kinase kinase kinase 17 {ECO:0000303|PubMed:25720833}; EC=2.7.11.25 {ECO:0000250|UniProtKB:Q9ZVP5, ECO:0000255|PROSITE-ProRule:PRU00159};	A0A1S3C2N9_CUCME,SubName: Full=mitogen-activated protein kinase kinase kinase 2-like {ECO:0000313|RefSeq:XP_008455899.1};
Cla010486	-2.095	0	0	0	--	K07976: RAB; Rab family, other	At3g21700	ref|XP_004151884.1|	--	A0A0A0LMW8_CUCSA,SubName: Full=Uncharacterized protein {ECO:0000313|EMBL:KGN63260.1};
Cla010513	0	0	0	2	--	--	At2g32280	ref|XP_004151872.1|	--	A0A0A0LR43_CUCSA,SubName: Full=Uncharacterized protein {ECO:0000313|EMBL:KGN63282.1};
Cla010534	0	0	0	-1.285	GO:0016021,integral component of membrane; GO:0005886,plasma membrane; GO:0005774,vacuolar membrane; GO:0005524,ATP binding; GO:0042626,ATPase activity, coupled to transmembrane movement of substances; GO:0010329,auxin efflux transmembrane transporter activity; GO:0010328,auxin influx transmembrane transporter activity; GO:0010315,auxin efflux; GO:0060919,auxin influx; GO:0010540,basipetal auxin …	K05658: ABCB1, CD243; ATP-binding cassette, subfamily B (MDR/TAP), member 1 [EC:3.6.3.44]	At3g62150	ref|XP_008441862.1|	AB21B_ARATH,RecName: Full=ABC transporter B family member 21; Short=ABC transporter ABCB.21; Short=AtABCB21; AltName: Full=Multidrug resistance protein 17; AltName: Full=P-glycoprotein 21;	A0A1S3B3Y1_CUCME,SubName: Full=ABC transporter B family member 4-like {ECO:0000313|RefSeq:XP_008441862.1, ECO:0000313|RefSeq:XP_008441863.1, ECO:0000313|RefSeq:XP_008441864.1};
Cla010615	0	0	0	-1.184	GO:0016021,integral component of membrane; GO:0005886,plasma membrane; GO:0022857,transmembrane transporter activity	--	At1g68170	ref|XP_011649111.1|	WTR6_ARATH,RecName: Full=WAT1-related protein At1g25270;	A0A1S3C690_CUCME,RecName: Full=WAT1-related protein {ECO:0000256|RuleBase:RU363077};
Cla010632	-1.079	0	0	0	GO:0005634,nucleus; GO:0003700,DNA binding transcription factor activity; GO:0043565,sequence-specific DNA binding; GO:0006351,transcription, DNA-templated	K09419: HSFF; heat shock transcription factor, other eukaryote	At3g24520	ref|XP_008463387.1|	HSFC1_ARATH,RecName: Full=Heat stress transcription factor C-1; Short=AtHsfC1; AltName: Full=AtHsf-08;	A0A1S3CJ61_CUCME,SubName: Full=heat stress transcription factor C-1-like {ECO:0000313|RefSeq:XP_008463387.1};
Cla010638	-2.088	0	1.13	0	--	--	--	ref|XP_008463402.1|	--	A0A1S3CKR2_CUCME,SubName: Full=transcription repressor OFP8-like {ECO:0000313|RefSeq:XP_008463402.1};
Cla010664	0	0	0	-1.163	GO:0047763,caffeate O-methyltransferase activity; GO:0046983,protein dimerization activity; GO:0009809,lignin biosynthetic process	K13066: E2.1.1.68, COMT; caffeic acid 3-O-methyltransferase [EC:2.1.1.68]	At5g54160	ref|XP_008462913.1|	COMT1_PRUDU,RecName: Full=Caffeic acid 3-O-methyltransferase; Short=CAOMT; Short=COMT; EC=2.1.1.68; AltName: Full=S-adenosysl-L-methionine:caffeic acid 3-O-methyltransferase;	A0A1S3CIH3_CUCME,SubName: Full=caffeic acid 3-O-methyltransferase 1 {ECO:0000313|RefSeq:XP_008462913.1};
Cla010665	1.826	0	0	0	GO:0033759,flavone synthase activity; GO:0046872,metal ion binding; GO:0034785,salicylate 5-hydroxylase activity; GO:0042742,defense response to bacterium; GO:0002229,defense response to oomycetes; GO:0009813,flavonoid biosynthetic process; GO:0010150,leaf senescence; GO:0009617,response to bacterium; GO:0009620,response to fungus; GO:0002239,response to oomycetes; GO:0009751,response to salicyli…	--	At5g24530	ref|XP_004137205.1|	DMR6_ARATH,RecName: Full=Protein DOWNY MILDEW RESISTANCE 6 {ECO:0000303|PubMed:15986928}; Short=AtDMR6 {ECO:0000303|PubMed:15986928}; EC=1.14.11.- {ECO:0000255|PROSITE-ProRule:PRU00805}; AltName: Full=2-oxoglutarate (2OG)-Fe(II) oxygenase-like protein DMR6 {ECO:0000303|PubMed:18248595}; AltName: Full=Salicylate 3-hydroxylase DMR6 {ECO:0000305}; Short=S3H DMR6 {ECO:0000305}; Short=SA 3-hydroxylase…	A0A0A0KVJ3_CUCSA,SubName: Full=1-aminocyclopropane-1-carboxylate oxidase {ECO:0000313|EMBL:KGN53620.1};
Cla010685	-1.295	0	0	0	--	--	At5g17210	ref|XP_022922463.1|	--	A0A0A0KU80_CUCSA,SubName: Full=Uncharacterized protein {ECO:0000313|EMBL:KGN53195.1};
Cla010711	-1.059	0	0	0	--	--	At5g26280	ref|XP_011653084.1|	--	A0A0A0KUE1_CUCSA,SubName: Full=Uncharacterized protein {ECO:0000313|EMBL:KGN53168.1};
Cla010713	0	0	5.911	0	GO:0005634,nucleus; GO:0003677,DNA binding; GO:0003700,DNA binding transcription factor activity; GO:0009873,ethylene-activated signaling pathway; GO:0006351,transcription, DNA-templated	--	At5g07580	ref|XP_008453871.1|	EF106_ARATH,RecName: Full=Ethylene-responsive transcription factor ERF106;	A0A1S3BX96_CUCME,SubName: Full=ethylene-responsive transcription factor ERF106 {ECO:0000313|RefSeq:XP_008453871.1};
Cla010740	0	0	1.816	0	GO:0005634,nucleus	K06911: K06911; uncharacterized protein	At3g59220	ref|XP_004152078.2|	PIRL_SOLLC,RecName: Full=Pirin-like protein;	A0A1S3BXE1_CUCME,SubName: Full=pirin-like protein {ECO:0000313|RefSeq:XP_008453920.1};
Cla010775	0	0	0	-3.345	GO:0008289,lipid binding; GO:0006869,lipid transport	--	At1g48750	ref|XP_022955426.1|	NLTP_VIGUN,RecName: Full=Probable non-specific lipid-transfer protein AKCS9; Short=LTP; Flags: Precursor;	A0A0B2QIV0_GLYSO,SubName: Full=Putative non-specific lipid-transfer protein AKCS9 {ECO:0000313|EMBL:KHN19692.1};
Cla010776	0	-1.001	0	0	GO:0016021,integral component of membrane; GO:0005516,calmodulin binding; GO:0050614,delta24-sterol reductase activity; GO:0050660,flavin adenine dinucleotide binding; GO:0016614,oxidoreductase activity, acting on CH-OH group of donors	K09828: DHCR24, DWF1; Delta24-sterol reductase [EC:1.3.1.72 1.3.1.-]	At3g19820	ref|XP_004137177.1|	DIM_PEA,RecName: Full=Delta(24)-sterol reductase; EC=1.3.1.72; AltName: Full=Cell elongation protein diminuto;	A0A0A0KZ82_CUCSA,SubName: Full=Uncharacterized protein {ECO:0000313|EMBL:KGN53687.1};
Cla010789	-1.452	0	0	0	GO:0031969,chloroplast membrane; GO:0016021,integral component of membrane; GO:0004252,serine-type endopeptidase activity	--	At5g38510	ref|XP_008455584.1|	RBL9_ARATH,RecName: Full=RHOMBOID-like protein 9, chloroplastic {ECO:0000303|PubMed:17181860}; Short=AtRBL9 {ECO:0000303|PubMed:17181860}; EC=3.4.21.- {ECO:0000305}; Flags: Precursor;	A0A1S3C0U5_CUCME,SubName: Full=RHOMBOID-like protein 9, chloroplastic isoform X5 {ECO:0000313|RefSeq:XP_008455584.1};
Cla010795	0	0	3.416	0	GO:0016021,integral component of membrane; GO:0006865,amino acid transport; GO:0080143,regulation of amino acid export	--	At4g31730	ref|XP_022949049.1|	GDU4_ARATH,RecName: Full=Protein GLUTAMINE DUMPER 4;	A0A0A0KW00_CUCSA,SubName: Full=Uncharacterized protein {ECO:0000313|EMBL:KGN53748.1};
Cla010810	0	0	-1.921	-1.519	GO:0005615,extracellular space	--	At5g15780	ref|XP_004137142.1|	OLEE1_BETPN,RecName: Full=Olee1-like protein; Flags: Precursor;	A0A0A0KW32_CUCSA,SubName: Full=Uncharacterized protein {ECO:0000313|EMBL:KGN53773.1};
Cla010813	-1.271	0	0	0	GO:0005634,nucleus; GO:0003700,DNA binding transcription factor activity; GO:0046983,protein dimerization activity; GO:0000977,RNA polymerase II regulatory region sequence-specific DNA binding; GO:0045944,positive regulation of transcription by RNA polymerase II; GO:0006351,transcription, DNA-templated	K09264: K09264; MADS-box transcription factor, plant	At1g26310	ref|XP_004137262.1|	AGL8_SOLTU,RecName: Full=Agamous-like MADS-box protein AGL8 homolog; AltName: Full=POTM1-1;	A0A0A0KW39_CUCSA,SubName: Full=Uncharacterized protein {ECO:0000313|EMBL:KGN53778.1};
Cla010816	1.254	0	0	0	GO:0005618,cell wall; GO:0005576,extracellular region; GO:0005794,Golgi apparatus; GO:0009506,plasmodesma; GO:0052691,UDP-arabinopyranose mutase activity; GO:0071555,cell wall organization; GO:0030244,cellulose biosynthetic process; GO:0071669,plant-type cell wall organization or biogenesis; GO:0006486,protein glycosylation	K13379: RGP, UTM; reversibly glycosylated polypeptide / UDP-arabinopyranose mutase [EC:2.4.1.- 5.4.99.30]	At5g15650	ref|XP_008464578.1|	RGP2_SOLTU,RecName: Full=Probable UDP-arabinopyranose mutase 2 {ECO:0000305}; EC=5.4.99.30 {ECO:0000250|UniProtKB:Q8H8T0}; AltName: Full=Reversibly glycosylated polypeptide 2 {ECO:0000303|PubMed:10580281}; Short=RGP2 {ECO:0000303|PubMed:10580281}; AltName: Full=UDP-L-arabinose mutase 2 {ECO:0000305}; AltName: Full=UDP-glucose:protein transglucosylase 2 {ECO:0000303|PubMed:10580281}; Short=UPTG 2 …	A0A1S3CNC9_CUCME,SubName: Full=alpha-1,4-glucan-protein synthase [UDP-forming] 2-like {ECO:0000313|RefSeq:XP_008464578.1};
Cla010820	2.133	0	0	0	--	--	--	gb|KGN53789.1|	--	A0A0A0KY59_CUCSA,SubName: Full=Uncharacterized protein {ECO:0000313|EMBL:KGN53789.1};
Cla010821	1.344	0	0	0	GO:0043680,filiform apparatus; GO:0016021,integral component of membrane; GO:0005622,intracellular; GO:0016020,membrane; GO:0005886,plasma membrane; GO:0009506,plasmodesma; GO:0005524,ATP binding; GO:0004672,protein kinase activity; GO:0004674,protein serine/threonine kinase activity; GO:0009738,abscisic acid-activated signaling pathway; GO:0009742,brassinosteroid mediated signaling pathway; GO:0…	K04733: IRAK4; interleukin-1 receptor-associated kinase 4 [EC:2.7.11.1]	At3g51550	ref|XP_008464585.1|	FERON_ARATH,RecName: Full=Receptor-like protein kinase FERONIA; EC=2.7.11.1; AltName: Full=Protein SIRENE; Flags: Precursor;	A0A1S3CLZ7_CUCME,SubName: Full=receptor-like protein kinase FERONIA {ECO:0000313|RefSeq:XP_008464585.1};
Cla010842	0	1.762	0	0	GO:0005777,peroxisome; GO:0005509,calcium ion binding	K13448: CML; calcium-binding protein CML	At3g07490	ref|XP_023526445.1|	CML3_ARATH,RecName: Full=Calmodulin-like protein 3;	A0A1S3BXJ7_CUCME,SubName: Full=calmodulin-like protein 3 {ECO:0000313|RefSeq:XP_008453977.1};
Cla010844	1.697	0	0	0	GO:0009986,cell surface; GO:0030139,endocytic vesicle; GO:0016021,integral component of membrane; GO:0032585,multivesicular body membrane; GO:0005886,plasma membrane; GO:0005524,ATP binding; GO:0042803,protein homodimerization activity; GO:0004674,protein serine/threonine kinase activity; GO:0019199,transmembrane receptor protein kinase activity; GO:0009793,embryo development ending in seed dorma…	--	At3g59420	ref|XP_004152097.1|	ACR4L_ARATH,RecName: Full=Serine/threonine-protein kinase-like protein ACR4; EC=2.7.11.1; AltName: Full=Protein CRINKLY 4; Short=AtCR4; Flags: Precursor;	A0A0A0KU81_CUCSA,SubName: Full=Uncharacterized protein {ECO:0000313|EMBL:KGN53088.1};
Cla010854	0	0	1.331	0	GO:0016491,oxidoreductase activity	--	At1g60690	ref|XP_011653050.1|	AKR2_ORYSJ,RecName: Full=Probable aldo-keto reductase 2; EC=1.1.1.-;	A0A0A0KW37_CUCSA,SubName: Full=Uncharacterized protein {ECO:0000313|EMBL:KGN53069.1};
Cla010865	-1.247	0	0	0	--	--	At1g27300	ref|XP_004152113.1|	--	A0A0A0KTW6_CUCSA,SubName: Full=Uncharacterized protein {ECO:0000313|EMBL:KGN53045.1};
Cla010908	0	0	0	-2.447	GO:0016021,integral component of membrane; GO:0046872,metal ion binding; GO:0030247,polysaccharide binding; GO:0061630,ubiquitin protein ligase activity; GO:0043161,proteasome-mediated ubiquitin-dependent protein catabolic process	K19041: RNF38_44; E3 ubiquitin-protein ligase RNF38/44 [EC:2.3.2.27]	At5g53110	ref|XP_008451949.1|	AT21A_ARATH,RecName: Full=Putative RING-H2 finger protein ATL21A; EC=2.3.2.27 {ECO:0000305}; AltName: Full=RING-type E3 ubiquitin transferase ATL21A {ECO:0000305}; Flags: Precursor;	A0A1S3BTU2_CUCME,SubName: Full=putative RING-H2 finger protein ATL21A {ECO:0000313|RefSeq:XP_008451949.1};
Cla010955	0	0	0	-3.484	GO:0005737,cytoplasm; GO:0047216,inositol 3-alpha-galactosyltransferase activity; GO:0046872,metal ion binding; GO:0006012,galactose metabolic process	K18819: GOLS; inositol 3-alpha-galactosyltransferase [EC:2.4.1.123]	At1g56600	ref|XP_004139524.1|	GOLS2_SOLLC,RecName: Full=Galactinol synthase 2; Short=GolS-2; Short=SlGolS2; EC=2.4.1.123;	A0A0A0LT16_CUCSA,RecName: Full=Hexosyltransferase {ECO:0000256|RuleBase:RU362027}; EC=2.4.1.- {ECO:0000256|RuleBase:RU362027};
Cla011113	1.185	0	0	0	GO:0005737,cytoplasm; GO:0005634,nucleus; GO:0003723,RNA binding; GO:0006417,regulation of translation	--	At5g56510	ref|XP_011660056.1|	PUM12_ARATH,RecName: Full=Pumilio homolog 12; Short=APUM-12; Short=AtPUM12;	A0A0A0LZQ0_CUCSA,SubName: Full=Uncharacterized protein {ECO:0000313|EMBL:KGN66352.1};
Cla011126	-1.128	0	0	0	GO:0005737,cytoplasm; GO:0047131,saccharopine dehydrogenase (NAD+, L-glutamate-forming) activity; GO:0047130,saccharopine dehydrogenase (NADP+, L-lysine-forming) activity; GO:0004753,saccharopine dehydrogenase activity; GO:0006091,generation of precursor metabolites and energy; GO:0033512,L-lysine catabolic process to acetyl-CoA via saccharopine; GO:0019878,lysine biosynthetic process via aminoad…	K14157: AASS; alpha-aminoadipic semialdehyde synthase [EC:1.5.1.8 1.5.1.9]	At4g33150	ref|XP_008450986.1|	AASS_ARATH,RecName: Full=Alpha-aminoadipic semialdehyde synthase; AltName: Full=cAt-LKR/SDH; Short=LKR/SDH; Includes: RecName: Full=Lysine ketoglutarate reductase; Short=LKR; EC=1.5.1.8; Includes: RecName: Full=Saccharopine dehydrogenase; EC=1.5.1.9; AltName: Full=cAt-SDH; Short=SDH;	A0A1S4DYB6_CUCME,SubName: Full=alpha-aminoadipic semialdehyde synthase isoform X1 {ECO:0000313|RefSeq:XP_008450986.1, ECO:0000313|RefSeq:XP_008450987.1, ECO:0000313|RefSeq:XP_008450989.1};
Cla011132	0	0	0	-2.029	GO:0050660,flavin adenine dinucleotide binding; GO:0004497,monooxygenase activity; GO:0004499,N,N-dimethylaniline monooxygenase activity; GO:0050661,NADP binding; GO:0071456,cellular response to hypoxia; GO:0009870,defense response signaling pathway, resistance gene-dependent; GO:0010204,defense response signaling pathway, resistance gene-independent; GO:0042742,defense response to bacterium; GO:…	K00485: FMO; dimethylaniline monooxygenase (N-oxide forming) [EC:1.14.13.8]	At1g19250	ref|XP_004144133.1|	FMO1_ARATH,RecName: Full=Probable flavin-containing monooxygenase 1; EC=1.14.13.-;	A0A0A0LZN2_CUCSA,RecName: Full=Flavin-containing monooxygenase {ECO:0000256|RuleBase:RU361177}; EC=1.-.-.- {ECO:0000256|RuleBase:RU361177};
Cla011176	-1.459	0	0	0	--	--	At5g17600	ref|XP_022987479.1|	--	A0A1S3BQC4_CUCME,SubName: Full=RING-H2 finger protein ATL52-like {ECO:0000313|RefSeq:XP_008450904.1};
Cla011202	1.176	0	0	0	--	--	At5g56980	ref|XP_022960601.1|	--	A0A1S4DYA9_CUCME,SubName: Full=uncharacterized protein LOC107991122 {ECO:0000313|RefSeq:XP_016900958.1};
Cla011205	4.18	1.626	0	1.632	GO:0005783,endoplasmic reticulum; GO:0005773,vacuole; GO:0019139,cytokinin dehydrogenase activity; GO:0050660,flavin adenine dinucleotide binding; GO:0016614,oxidoreductase activity, acting on CH-OH group of donors; GO:0008131,primary amine oxidase activity; GO:0009823,cytokinin catabolic process	K00279: CKX; cytokinin dehydrogenase [EC:1.5.99.12]	At5g56970	ref|XP_008450862.1|	CKX3_ARATH,RecName: Full=Cytokinin dehydrogenase 3; EC=1.5.99.12; AltName: Full=Cytokinin oxidase 3; Short=AtCKX3; Short=CKO 3; Flags: Precursor;	A0A1S3BQ60_CUCME,SubName: Full=cytokinin dehydrogenase 3-like {ECO:0000313|RefSeq:XP_008450862.1};
Cla011244	1.654	0	0	0	GO:0005737,cytoplasm; GO:0050113,inositol oxygenase activity; GO:0005506,iron ion binding; GO:0019310,inositol catabolic process; GO:0019853,L-ascorbic acid biosynthetic process	K00469: MIOX; inositol oxygenase [EC:1.13.99.1]	At4g26260	ref|XP_008450805.1|	MIOX4_ARATH,RecName: Full=Inositol oxygenase 4; EC=1.13.99.1; AltName: Full=Myo-inositol oxygenase 4; Short=AtMIOX4; Short=MI oxygenase 4;	A0A1S3BQR6_CUCME,SubName: Full=inositol oxygenase 2-like {ECO:0000313|RefSeq:XP_008450805.1};
Cla011248	-1.008	0	0	0	GO:0005634,nucleus; GO:0003700,DNA binding transcription factor activity; GO:0044212,transcription regulatory region DNA binding; GO:0071555,cell wall organization; GO:0007275,multicellular organism development; GO:0045893,positive regulation of transcription, DNA-templated; GO:1905177,tracheary element differentiation; GO:0006351,transcription, DNA-templated	--	At4g29230	ref|XP_008450799.1|	NAC75_ARATH,RecName: Full=NAC domain-containing protein 75 {ECO:0000303|PubMed:15029955}; Short=ANAC075 {ECO:0000303|PubMed:15029955};	A0A1S3BQR1_CUCME,SubName: Full=NAC transcription factor NAM-A1-like {ECO:0000313|RefSeq:XP_008450799.1};
Cla011252	-1.06	0	0	0	--	--	At5g56550	ref|XP_022987891.1|	--	A0A0A0LWB5_CUCSA,SubName: Full=Uncharacterized protein {ECO:0000313|EMBL:KGN66190.1};
Cla011254	-1.082	0	0	0	--	--	--	gb|KGN66188.1|	--	A0A0A0LWP4_CUCSA,SubName: Full=Uncharacterized protein {ECO:0000313|EMBL:KGN66188.1};
Cla011256	1.226	0	0	0	GO:0005618,cell wall; GO:0005737,cytoplasm; GO:0005576,extracellular region; GO:0045330,aspartyl esterase activity; GO:0030599,pectinesterase activity; GO:0042545,cell wall modification; GO:0045490,pectin catabolic process	K01051: E3.1.1.11; pectinesterase [EC:3.1.1.11]	At5g19730	ref|XP_008450789.1|	PME53_ARATH,RecName: Full=Probable pectinesterase 53; Short=PE 53; EC=3.1.1.11; AltName: Full=Pectin methylesterase 53; Short=AtPME53; Flags: Precursor;	A0A1S3BQQ1_CUCME,RecName: Full=Pectinesterase {ECO:0000256|RuleBase:RU000589}; EC=3.1.1.11 {ECO:0000256|RuleBase:RU000589};
Cla011260	0	0	1.052	0	GO:0016021,integral component of membrane; GO:0005886,plasma membrane; GO:0005524,ATP binding; GO:0004672,protein kinase activity; GO:0004674,protein serine/threonine kinase activity; GO:0004714,transmembrane receptor protein tyrosine kinase activity; GO:0010227,floral organ abscission; GO:0010102,lateral root morphogenesis; GO:0045490,pectin catabolic process; GO:0046777,protein autophosphorylat…	K00924: E2.7.1.-; kinase [EC:2.7.1.-]	At5g25930	ref|XP_008450784.1|	RLK5_ARATH,RecName: Full=Receptor-like protein kinase 5; EC=2.7.10.1; EC=2.7.11.1; AltName: Full=Protein HAESA; Flags: Precursor;	A0A1S3BR21_CUCME,SubName: Full=receptor-like protein kinase 5 {ECO:0000313|RefSeq:XP_008450784.1};
Cla011267	-1.68	0	0	0	GO:0005737,cytoplasm; GO:0005634,nucleus; GO:0005886,plasma membrane; GO:0046872,metal ion binding; GO:0004721,phosphoprotein phosphatase activity; GO:0019901,protein kinase binding; GO:0004722,protein serine/threonine phosphatase activity; GO:0009738,abscisic acid-activated signaling pathway; GO:0009788,negative regulation of abscisic acid-activated signaling pathway; GO:0006470,protein dephosph…	--	At4g26080	ref|XP_004135669.1|	P2C56_ARATH,RecName: Full=Protein phosphatase 2C 56; Short=AtPP2C56; EC=3.1.3.16; AltName: Full=Protein ABSCISIC ACID-INSENSITIVE 1; AltName: Full=Protein phosphatase 2C ABI1; Short=PP2C ABI1;	A0A0A0M1Q8_CUCSA,SubName: Full=Uncharacterized protein {ECO:0000313|EMBL:KGN66171.1};
Cla011312	-1.044	0	0	0	--	--	At5g18860	ref|XP_022681358.1|	--	K7L3S7_SOYBN,SubName: Full=Uncharacterized protein {ECO:0000313|EnsemblPlants:GLYMA07G38300.2};
Cla011338	0	-1.136	0	0	GO:0005887,integral component of plasma membrane; GO:0016020,membrane; GO:0035673,oligopeptide transmembrane transporter activity; GO:0015031,protein transport	--	At4g10770	ref|XP_008437437.1|	OPT7_ARATH,RecName: Full=Oligopeptide transporter 7; Short=AtOPT7;	A0A1S3AUK6_CUCME,SubName: Full=LOW QUALITY PROTEIN: oligopeptide transporter 7 {ECO:0000313|RefSeq:XP_008437437.1};
Cla011339	0	-1.332	0	0	GO:0005887,integral component of plasma membrane; GO:0016020,membrane; GO:0035673,oligopeptide transmembrane transporter activity; GO:0015031,protein transport	--	At4g10770	ref|XP_004143945.1|	OPT7_ARATH,RecName: Full=Oligopeptide transporter 7; Short=AtOPT7;	A0A0A0KJX4_CUCSA,SubName: Full=Uncharacterized protein {ECO:0000313|EMBL:KGN49990.1};
Cla011345	3.199	0	0	0	GO:0005634,nucleus; GO:0003700,DNA binding transcription factor activity; GO:0000981,RNA polymerase II transcription factor activity, sequence-specific DNA binding; GO:0043565,sequence-specific DNA binding; GO:0001135,transcription factor activity, RNA polymerase II transcription factor recruiting; GO:0044212,transcription regulatory region DNA binding; GO:0048354,mucilage biosynthetic process in…	K09422: MYBP; transcription factor MYB, plant	At3g13540	ref|XP_008437429.1|	MYB5_ARATH,RecName: Full=Transcription repressor MYB5; AltName: Full=AtM2; AltName: Full=Myb-related protein 5; Short=AtMYB5;	A0A1S3AU00_CUCME,SubName: Full=transcription factor WER-like {ECO:0000313|RefSeq:XP_008437429.1};
Cla011369	1.293	0	0	0	GO:0005886,plasma membrane; GO:0004555,alpha,alpha-trehalase activity; GO:0005993,trehalose catabolic process	K01194: TREH, treA, treF; alpha,alpha-trehalase [EC:3.2.1.28]	At4g24040	ref|XP_008437392.1|	TRE_ORYSJ,RecName: Full=Probable trehalase; EC=3.2.1.28; AltName: Full=Alpha,alpha-trehalase; AltName: Full=Alpha,alpha-trehalose glucohydrolase;	A0A1S3ATK4_CUCME,RecName: Full=Trehalase {ECO:0000256|RuleBase:RU361180}; EC=3.2.1.28 {ECO:0000256|RuleBase:RU361180}; AltName: Full=Alpha-trehalose glucohydrolase {ECO:0000256|RuleBase:RU361180};
Cla011370	1.513	0	0	0	GO:0016021,integral component of membrane; GO:0005886,plasma membrane; GO:0004555,alpha,alpha-trehalase activity; GO:0005993,trehalose catabolic process	K01194: TREH, treA, treF; alpha,alpha-trehalase [EC:3.2.1.28]	At4g24040	ref|XP_004143867.2|	TRE1_ARATH,RecName: Full=Trehalase; EC=3.2.1.28; AltName: Full=Alpha,alpha-trehalase; AltName: Full=Alpha,alpha-trehalose glucohydrolase; AltName: Full=Trehalase 1; Short=AtTRE1;	A0A0A0KMF2_CUCSA,RecName: Full=Trehalase {ECO:0000256|RuleBase:RU361180}; EC=3.2.1.28 {ECO:0000256|RuleBase:RU361180}; AltName: Full=Alpha-trehalose glucohydrolase {ECO:0000256|RuleBase:RU361180};
Cla011374	1.091	0	0	0	GO:0005576,extracellular region; GO:0030246,carbohydrate binding; GO:0008810,cellulase activity; GO:0071555,cell wall organization; GO:0030245,cellulose catabolic process	K01179: E3.2.1.4; endoglucanase [EC:3.2.1.4]	At1g64390	ref|XP_004143869.1|	GUN6_ARATH,RecName: Full=Endoglucanase 6; EC=3.2.1.4; AltName: Full=Endo-1,4-beta glucanase 6; Flags: Precursor;	A0A0A0KNR9_CUCSA,RecName: Full=Endoglucanase {ECO:0000256|RuleBase:RU361166}; EC=3.2.1.4 {ECO:0000256|RuleBase:RU361166};
Cla011378	1.864	0	0	0	--	--	--	ref|XP_022146004.1|	--	A0A1S3AUH3_CUCME,SubName: Full=uncharacterized protein LOC103482815 {ECO:0000313|RefSeq:XP_008437383.1};
Cla011415	0	2.674	0	0	GO:0005737,cytoplasm; GO:0046914,transition metal ion binding; GO:0046916,cellular transition metal ion homeostasis; GO:0030001,metal ion transport	--	At1g01490	ref|XP_023551446.1|	HIP39_ARATH,RecName: Full=Heavy metal-associated isoprenylated plant protein 39 {ECO:0000303|PubMed:21072340, ECO:0000303|PubMed:23368984}; Short=AtHIP39 {ECO:0000303|PubMed:21072340, ECO:0000303|PubMed:23368984}; Flags: Precursor;	A0A1S3AUB4_CUCME,SubName: Full=uncharacterized protein LOC103482783 {ECO:0000313|RefSeq:XP_008437330.1};
Cla011424	0	1.226	0	0	GO:0005829,cytosol; GO:0005634,nucleus; GO:0009506,plasmodesma; GO:0003677,DNA binding; GO:0003700,DNA binding transcription factor activity; GO:0006351,transcription, DNA-templated	--	At5g41410	ref|XP_008437318.1|	BEL1_ARATH,RecName: Full=Homeobox protein BEL1 homolog;	A0A1S3AUA2_CUCME,SubName: Full=LOW QUALITY PROTEIN: homeobox protein BEL1 homolog {ECO:0000313|RefSeq:XP_008437318.1};
Cla011428	-1.459	0	0	0	GO:0005634,nucleus; GO:0003677,DNA binding; GO:0008270,zinc ion binding; GO:0009908,flower development; GO:0048577,negative regulation of short-day photoperiodism, flowering; GO:0009909,regulation of flower development; GO:0006355,regulation of transcription, DNA-templated; GO:0006351,transcription, DNA-templated	--	At5g41380	gb|KGN50077.1|	CO3_ORYSJ,RecName: Full=Zinc finger protein CO3 {ECO:0000305}; AltName: Full=Protein CONSTANS-like CO3; Short=OsCO3 {ECO:0000303|PubMed:18449564};	A0A0A0KNV6_CUCSA,SubName: Full=Uncharacterized protein {ECO:0000313|EMBL:KGN50077.1};
Cla011477	-1.29	0	0	0	GO:0005829,cytosol; GO:0005886,plasma membrane; GO:0050373,UDP-arabinose 4-epimerase activity; GO:0003978,UDP-glucose 4-epimerase activity; GO:0045227,capsule polysaccharide biosynthetic process; GO:0071555,cell wall organization; GO:0006012,galactose metabolic process; GO:0033358,UDP-L-arabinose biosynthetic process	K01784: galE, GALE; UDP-glucose 4-epimerase [EC:5.1.3.2]	At1g12780	ref|XP_008437222.1|	UGE1_ARATH,RecName: Full=Bifunctional UDP-glucose 4-epimerase and UDP-xylose 4-epimerase 1; EC=5.1.3.2; EC=5.1.3.5; AltName: Full=UDP-D-xylose 4-epimerase; AltName: Full=UDP-L-arabinose 4-epimerase; AltName: Full=UDP-galactose 4-epimerase 1; AltName: Full=UDP-glucose 4-epimerase 1; Short=AtUGE1;	A0A1S3AT55_CUCME,SubName: Full=bifunctional UDP-glucose 4-epimerase and UDP-xylose 4-epimerase 1 {ECO:0000313|RefSeq:XP_008437222.1};
Cla011483	-2.359	0	0	0	GO:0005576,extracellular region; GO:0016298,lipase activity; GO:0016042,lipid catabolic process	--	At1g53920	ref|XP_004143991.1|	GLIP5_ARATH,RecName: Full=GDSL esterase/lipase 5; EC=3.1.1.-; AltName: Full=Extracellular lipase 5; Flags: Precursor;	A0A0A0KP02_CUCSA,SubName: Full=Uncharacterized protein {ECO:0000313|EMBL:KGN50142.1};
Cla011513	0	0	0	-1.27	GO:0009507,chloroplast; GO:0009570,chloroplast stroma; GO:0080042,ADP-glucose pyrophosphohydrolase activity; GO:0080041,ADP-ribose pyrophosphohydrolase activity; GO:0019144,ADP-sugar diphosphatase activity; GO:0046872,metal ion binding	K18447: NUDX14; ADP-sugar diphosphatase [EC:3.6.1.21]	At4g11980	ref|XP_008437180.1|	NUD14_ARATH,RecName: Full=Nudix hydrolase 14, chloroplastic; Short=AtNUDT14; EC=3.6.1.21; AltName: Full=ADP-sugar diphosphatase; Short=AtASPP; Flags: Precursor;	A0A1S3ATD5_CUCME,SubName: Full=nudix hydrolase 14, chloroplastic {ECO:0000313|RefSeq:XP_008437180.1};
Cla011528	0	0	-1.096	0	GO:0016021,integral component of membrane; GO:0005886,plasma membrane; GO:0015297,antiporter activity; GO:0015238,drug transmembrane transporter activity; GO:0071244,cellular response to carbon dioxide; GO:0006855,drug transmembrane transport; GO:1902456,regulation of stomatal opening	K03327: TC.MATE, SLC47A, norM, mdtK, dinF; multidrug resistance protein, MATE family	At4g22790	ref|XP_008437164.1|	DTX56_ARATH,RecName: Full=Protein DETOXIFICATION 56 {ECO:0000303|PubMed:11739388}; Short=AtDTX56 {ECO:0000303|PubMed:11739388}; AltName: Full=Multidrug and toxic compound extrusion protein 56 {ECO:0000305}; Short=MATE protein 56 {ECO:0000305}; AltName: Full=Protein RESISTANT TO HIGH CARBON DIOXIDE 1 {ECO:0000303|PubMed:25599916};	A0A1S3ATW5_CUCME,RecName: Full=Protein DETOXIFICATION {ECO:0000256|RuleBase:RU004914}; AltName: Full=Multidrug and toxic compound extrusion protein {ECO:0000256|RuleBase:RU004914};
Cla011536	0	0	0	2.542	--	--	At5g12900	ref|XP_004147608.2|	IRKI_ARATH,RecName: Full=IRK-interacting protein {ECO:0000303|PubMed:15618632};	A0A0A0KMS3_CUCSA,SubName: Full=Uncharacterized protein {ECO:0000313|EMBL:KGN50194.1};
Cla011547	2.005	0	0	0	GO:0005789,endoplasmic reticulum membrane; GO:0016021,integral component of membrane; GO:0102811,geraniol 10-hydroxylase activity; GO:0020037,heme binding; GO:0005506,iron ion binding; GO:0016709,oxidoreductase activity, acting on paired donors, with incorporation or reduction of molecular oxygen, NAD(P)H as one donor, and incorporation of one atom of oxygen; GO:0016099,monoterpenoid biosynthetic…	--	At4g12300	ref|XP_004147582.1|	C76BA_SWEMU,RecName: Full=Geraniol 8-hydroxylase; EC=1.14.13.152; AltName: Full=Cytochrome P450 76B10; AltName: Full=Geraniol 10-hydroxylase; Short=SmG10H;	M1A0V4_SOLTU,SubName: Full=Uncharacterized protein {ECO:0000313|EnsemblPlants:PGSC0003DMT400012194};
Cla011548	1.023	0	0	0	GO:0005634,nucleus; GO:0003677,DNA binding; GO:0006355,regulation of transcription, DNA-templated; GO:0006351,transcription, DNA-templated	K09422: MYBP; transcription factor MYB, plant	At1g66230	ref|XP_011654787.1|	ODO1_PETHY,RecName: Full=Protein ODORANT1; AltName: Full=MYB-like protein ODO1;	A0A0A0KMT4_CUCSA,SubName: Full=Uncharacterized protein {ECO:0000313|EMBL:KGN50209.1};
Cla011550	0	0	-2.089	0	GO:0048046,apoplast; GO:0004857,enzyme inhibitor activity; GO:0046910,pectinesterase inhibitor activity	--	At1g62770	ref|XP_008437134.1|	PMEI9_ARATH,RecName: Full=Pectinesterase inhibitor 9 {ECO:0000305}; AltName: Full=Pectin methylesterase inhibitor 9 {ECO:0000303|PubMed:28034952}; Short=AtPMEI9 {ECO:0000303|PubMed:28034952}; Flags: Precursor;	A0A1S3ATE5_CUCME,SubName: Full=21 kDa protein-like {ECO:0000313|RefSeq:XP_008437134.1};
Cla011551	1.566	0	0	0	GO:0048046,apoplast; GO:0004857,enzyme inhibitor activity; GO:0046910,pectinesterase inhibitor activity; GO:0071669,plant-type cell wall organization or biogenesis	--	At1g62763	ref|XP_004147611.1|	PMI10_ARATH,RecName: Full=Pectinesterase inhibitor 10 {ECO:0000305}; AltName: Full=Pectin methylesterase inhibitor 10 {ECO:0000303|PubMed:28082716}; Short=AtPMEI10 {ECO:0000303|PubMed:28082716}; Flags: Precursor;	A0A1S3AUN6_CUCME,SubName: Full=21 kDa protein-like {ECO:0000313|RefSeq:XP_008437716.2};
Cla011554	-1.04	0	0	0	GO:0005634,nucleus; GO:0003700,DNA binding transcription factor activity; GO:0043565,sequence-specific DNA binding; GO:0071555,cell wall organization; GO:0007275,multicellular organism development; GO:1901348,positive regulation of secondary cell wall biogenesis; GO:0006355,regulation of transcription, DNA-templated; GO:0006351,transcription, DNA-templated; GO:0048759,xylem vessel member cell dif…	--	At1g12260	ref|XP_004147614.1|	NAC7_ARATH,RecName: Full=NAC domain-containing protein 7 {ECO:0000303|PubMed:15029955}; Short=ANAC007 {ECO:0000303|PubMed:15029955}; AltName: Full=Protein EMBRYO DEFECTIVE 2749 {ECO:0000303|Ref.7}; AltName: Full=Protein VASCULAR RELATED NAC-DOMAIN 4 {ECO:0000303|PubMed:16103214};	A0A0A0KKJ4_CUCSA,SubName: Full=Uncharacterized protein {ECO:0000313|EMBL:KGN50215.1};
Cla011559	1.171	0	0	0	GO:0016021,integral component of membrane; GO:0005775,vacuolar lumen; GO:0004575,sucrose alpha-glucosidase activity; GO:0005985,sucrose metabolic process	K01193: INV, sacA; beta-fructofuranosidase [EC:3.2.1.26]	At1g12240	ref|NP_001284386.1|	INVA_VICFA,RecName: Full=Acid beta-fructofuranosidase; EC=3.2.1.26; AltName: Full=Acid invertase; Short=AI; AltName: Full=Acid sucrose hydrolase; AltName: Full=Vacuolar invertase; Flags: Precursor;	D8L2T0_CUCME,SubName: Full=Acid invertase 1 {ECO:0000313|EMBL:ACS94417.1}; EC=3.1.2.26 {ECO:0000313|EMBL:ACS94417.1}; SubName: Full=acid beta-fructofuranosidase-like {ECO:0000313|RefSeq:NP_001284386.1};
Cla011565	0	1.032	0	0	--	--	At1g62520	ref|XP_008437118.1|	--	A0A1S3AT83_CUCME,SubName: Full=uncharacterized protein LOC103482634 {ECO:0000313|RefSeq:XP_008437118.1};
Cla011585	0	0	0	-1.664	GO:0005618,cell wall; GO:0005576,extracellular region; GO:0045330,aspartyl esterase activity; GO:0030599,pectinesterase activity; GO:0042545,cell wall modification; GO:0045490,pectin catabolic process	--	At5g47500	ref|XP_008437714.2|	PME68_ARATH,RecName: Full=Probable pectinesterase 68; Short=PE 68; EC=3.1.1.11; AltName: Full=Pectin methylesterase 68; Short=AtPME68; Flags: Precursor;	A0A1S3AUB3_CUCME,RecName: Full=Pectinesterase {ECO:0000256|RuleBase:RU000589}; EC=3.1.1.11 {ECO:0000256|RuleBase:RU000589};
Cla011593	0	-1.151	0	0	GO:0042807,central vacuole; GO:0009507,chloroplast; GO:0005887,integral component of plasma membrane; GO:0009705,plant-type vacuole membrane; GO:0005774,vacuolar membrane; GO:0005773,vacuole; GO:0015250,water channel activity; GO:0034220,ion transmembrane transport	K09873: TIP; aquaporin TIP	At4g17340	ref|XP_008437066.1|	TIP22_ARATH,RecName: Full=Probable aquaporin TIP2-2; AltName: Full=Tonoplast intrinsic protein 2-2; Short=AtTIP2;2;	A0A1S3ATP6_CUCME,SubName: Full=probable aquaporin TIP2-2 {ECO:0000313|RefSeq:XP_008437066.1};
Cla011629	0	0	0	-1.417	GO:0016021,integral component of membrane; GO:0005886,plasma membrane; GO:0015172,acidic amino acid transmembrane transporter activity; GO:0015175,neutral amino acid transmembrane transporter activity; GO:0015399,primary active transmembrane transporter activity; GO:0015293,symporter activity; GO:0006865,amino acid transport	K14209: SLC36A, PAT; solute carrier family 36 (proton-coupled amino acid transporter)	At5g63850	ref|XP_008442267.1|	AAP4_ARATH,RecName: Full=Amino acid permease 4; AltName: Full=Amino acid transporter AAP4;	A0A1S3B5B0_CUCME,SubName: Full=amino acid permease 4-like {ECO:0000313|RefSeq:XP_008442267.1};
Cla011631	0	0	0	-1.794	GO:0016021,integral component of membrane; GO:0005886,plasma membrane; GO:0015171,amino acid transmembrane transporter activity; GO:0015174,basic amino acid transmembrane transporter activity; GO:0015293,symporter activity; GO:0015809,arginine transport; GO:0015802,basic amino acid transport	--	At1g44100	ref|XP_008442173.1|	AAP5_ARATH,RecName: Full=Amino acid permease 5; AltName: Full=Amino acid transporter AAP5;	A0A1S3B5V1_CUCME,SubName: Full=amino acid permease 4-like {ECO:0000313|RefSeq:XP_008442173.1};
Cla011675	-3.041	0	0	0	--	--	--	--	--	--
Cla011676	-1.469	0	0	0	GO:0043231,intracellular membrane-bounded organelle; GO:0005739,mitochondrion; GO:0004519,endonuclease activity; GO:0003723,RNA binding; GO:0009451,RNA modification	--	At1g52640	ref|XP_022967779.1|	PP150_ARATH,RecName: Full=Pentatricopeptide repeat-containing protein At2g13420, mitochondrial; Flags: Precursor;	A0A1S3B4Y0_CUCME,SubName: Full=pentatricopeptide repeat-containing protein At2g13420, mitochondrial-like {ECO:0000313|RefSeq:XP_008442112.1};
Cla011740	0	1.83	0	0	GO:0005509,calcium ion binding; GO:0009733,response to auxin	K10840: CETN2; centrin-2	At4g27280	ref|XP_008452312.1|	PBP1_ARATH,RecName: Full=Calcium-binding protein PBP1; AltName: Full=KIC-related protein 2; AltName: Full=PINOID-binding protein 1;	A0A1S3BSY1_CUCME,SubName: Full=calcium-binding protein PBP1 {ECO:0000313|RefSeq:XP_008452312.1};
Cla011745	0	0	1.874	0	--	--	At4g10270	ref|XP_022993930.1|	--	A0A0A0L594_CUCSA,SubName: Full=Uncharacterized protein {ECO:0000313|EMBL:KGN56204.1};
Cla011761	-3.922	0	0	-1.215	GO:0005634,nucleus; GO:0003677,DNA binding; GO:0006355,regulation of transcription, DNA-templated; GO:0006351,transcription, DNA-templated	--	At3g15500	ref|XP_004133700.1|	NAC72_ARATH,RecName: Full=NAC domain-containing protein 72; Short=ANAC072; AltName: Full=Protein RESPONSIVE TO DESICCATION 26;	A0A0A0L6K6_CUCSA,SubName: Full=Uncharacterized protein {ECO:0000313|EMBL:KGN56222.1};
Cla011807	1	0	0	0	--	--	--	gb|KGN56255.1|	--	A0A0A0L2N9_CUCSA,SubName: Full=Uncharacterized protein {ECO:0000313|EMBL:KGN56255.1};
Cla011866	-1.239	0	0	0	GO:0016787,hydrolase activity; GO:0016740,transferase activity; GO:0006541,glutamine metabolic process; GO:2000032,regulation of secondary shoot formation	--	At5g38200	ref|XP_008441264.1|	GT121_ARATH,RecName: Full=Putative glutamine amidotransferase GAT1_2.1 {ECO:0000305}; EC=2.4.2.- {ECO:0000305}; AltName: Full=Class I glutamine amidotransferase {ECO:0000303|PubMed:22885937}; AltName: Full=GAT1_2 domain-containing protein 1 {ECO:0000305};	A0A1S3B3T0_CUCME,SubName: Full=uncharacterized protein LOC103485446 {ECO:0000313|RefSeq:XP_008441264.1};
Cla011951	-1.488	0	0	0	--	--	At1g72100	ref|XP_022938890.1|	--	A0A1S3CA56_CUCME,SubName: Full=uncharacterized protein LOC103498695 {ECO:0000313|RefSeq:XP_008459625.1};
Cla012016	1.118	0	0	0	--	--	--	gb|KGN54430.1|	--	A0A0A0KXR7_CUCSA,SubName: Full=Uncharacterized protein {ECO:0000313|EMBL:KGN54430.1};
Cla012019	0	0	0	-1.408	GO:0005759,mitochondrial matrix; GO:0005739,mitochondrion; GO:0005507,copper ion binding; GO:0004069,L-aspartate:2-oxoglutarate aminotransferase activity; GO:0080130,L-phenylalanine:2-oxoglutarate aminotransferase activity; GO:0030170,pyridoxal phosphate binding; GO:0006103,2-oxoglutarate metabolic process; GO:0006531,aspartate metabolic process; GO:0009058,biosynthetic process; GO:0006536,glutam…	K14455: GOT2; aspartate aminotransferase, mitochondrial [EC:2.6.1.1]	At2g30970	ref|XP_023544199.1|	AAT1_ARATH,RecName: Full=Aspartate aminotransferase, mitochondrial; EC=2.6.1.1; AltName: Full=Transaminase A; Flags: Precursor;	A0A0A0KXS3_CUCSA,RecName: Full=Aspartate aminotransferase {ECO:0000256|RuleBase:RU000480}; EC=2.6.1.1 {ECO:0000256|RuleBase:RU000480};
Cla012036	1.088	0	0	0	--	--	At5g01910	ref|XP_008463266.1|	--	A0A1S3CJ78_CUCME,SubName: Full=high mobility group B protein 6 {ECO:0000313|RefSeq:XP_008463266.1};
Cla012144	2.042	2.564	0	0	GO:0005737,cytoplasm; GO:0005634,nucleus; GO:0003677,DNA binding; GO:0003700,DNA binding transcription factor activity; GO:0006351,transcription, DNA-templated	--	At5g18270	ref|XP_008441966.1|	NAC87_ARATH,RecName: Full=NAC domain-containing protein 87 {ECO:0000303|PubMed:15029955}; Short=ANAC087 {ECO:0000303|PubMed:15029955};	A0A1S3B442_CUCME,SubName: Full=NAC domain-containing protein 79-like {ECO:0000313|RefSeq:XP_008441966.1};
Cla012161	-1.152	0	0	0	--	--	--	ref|XP_023517463.1|	--	A0A0A0L3D7_CUCSA,SubName: Full=Uncharacterized protein {ECO:0000313|EMBL:KGN54646.1};
Cla012198	0	0	0	-1.107	GO:0016157,sucrose synthase activity; GO:0046524,sucrose-phosphate synthase activity; GO:0005986,sucrose biosynthetic process	K00696: E2.4.1.14; sucrose-phosphate synthase [EC:2.4.1.14]	At5g20280	ref|XP_008443934.1|	SPSA1_CITUN,RecName: Full=Probable sucrose-phosphate synthase 1; EC=2.4.1.14; AltName: Full=UDP-glucose-fructose-phosphate glucosyltransferase 1;	A0A1S3B9Y7_CUCME,SubName: Full=probable sucrose-phosphate synthase 1 {ECO:0000313|RefSeq:XP_008443934.1};
Cla012239	-1.728	0	0	-3.164	GO:0005783,endoplasmic reticulum; GO:0005634,nucleus; GO:0016036,cellular response to phosphate starvation	--	At2g26660	ref|XP_004150027.1|	SPX2_ARATH,RecName: Full=SPX domain-containing protein 2 {ECO:0000303|PubMed:18315545}; AltName: Full=Protein SPX DOMAIN GENE 2 {ECO:0000303|PubMed:18315545}; Short=AtSPX2 {ECO:0000303|PubMed:18315545};	A0A0A0LTT3_CUCSA,SubName: Full=Uncharacterized protein {ECO:0000313|EMBL:KGN65335.1};
Cla012240	0	2.387	0	0	GO:0005576,extracellular region; GO:0009505,plant-type cell wall; GO:0009506,plasmodesma; GO:0020037,heme binding; GO:0046872,metal ion binding; GO:0004601,peroxidase activity; GO:0042744,hydrogen peroxide catabolic process; GO:0006979,response to oxidative stress	K00430: E1.11.1.7; peroxidase [EC:1.11.1.7]	At2g41480	ref|XP_004150026.2|	PER25_ARATH,RecName: Full=Peroxidase 25; Short=Atperox P25; EC=1.11.1.7; Flags: Precursor;	A0A0A0LWG8_CUCSA,RecName: Full=Peroxidase {ECO:0000256|RuleBase:RU362060, ECO:0000256|SAAS:SAAS00709852}; EC=1.11.1.7 {ECO:0000256|RuleBase:RU362060, ECO:0000256|SAAS:SAAS00709852};
Cla012250	-1.242	0	1.856	1.23	GO:0016021,integral component of membrane; GO:0015293,symporter activity; GO:0042128,nitrate assimilation; GO:0006857,oligopeptide transport; GO:0009753,response to jasmonic acid; GO:0009611,response to wounding	--	At2g26690	ref|XP_011656291.1|	PTR27_ARATH,RecName: Full=Protein NRT1/ PTR FAMILY 6.2; Short=AtNPF6.2; AltName: Full=Nitrate transporter 1.4;	L0EJZ7_CUCSA,SubName: Full=Nitrate transporter NRT1.4B {ECO:0000313|EMBL:AGA60121.1};
Cla012263	-2.516	-2.416	-1.546	0	--	--	At1g15410	ref|XP_008465022.1|	--	A0A1S3CMU2_CUCME,SubName: Full=uncharacterized protein LOC103502741 isoform X1 {ECO:0000313|RefSeq:XP_008465022.1};
Cla012292	0	0	0	-1.469	--	--	At5g20140	ref|XP_004151455.2|	--	A0A0A0LU04_CUCSA,SubName: Full=Uncharacterized protein {ECO:0000313|EMBL:KGN65405.1};
Cla012304	-1.42	0	0	0	GO:0005737,cytoplasm; GO:0003743,translation initiation factor activity; GO:0031047,gene silencing by RNA; GO:0048366,leaf development; GO:0019827,stem cell population maintenance	K11593: ELF2C, AGO; eukaryotic translation initiation factor 2C	At5g43810	ref|XP_004146290.1|	PNH1_ORYSJ,RecName: Full=Protein argonaute PNH1; AltName: Full=Protein PINHEAD homolog 1; Short=OsPNH1;	A0A1S3CJ14_CUCME,SubName: Full=protein argonaute PNH1-like {ECO:0000313|RefSeq:XP_008463335.1, ECO:0000313|RefSeq:XP_008463336.1};
Cla012308	0	0	1.054	0	GO:0016021,integral component of membrane; GO:0005886,plasma membrane; GO:0005524,ATP binding; GO:0004672,protein kinase activity	K04733: IRAK4; interleukin-1 receptor-associated kinase 4 [EC:2.7.11.1]	At2g26730	ref|XP_008463343.1|	Y2267_ARATH,RecName: Full=Probable inactive receptor kinase At2g26730; Flags: Precursor;	A0A1S3CIZ4_CUCME,SubName: Full=probable inactive receptor kinase At2g26730 {ECO:0000313|RefSeq:XP_008463343.1};
Cla012315	-2.049	0	0	0	GO:0005634,nucleus; GO:0009734,auxin-activated signaling pathway; GO:0006355,regulation of transcription, DNA-templated; GO:0009733,response to auxin; GO:0006351,transcription, DNA-templated	K14484: IAA; auxin-responsive protein IAA	At3g04730	ref|XP_008463353.1|	IAA11_ORYSJ,RecName: Full=Auxin-responsive protein IAA11; AltName: Full=Indoleacetic acid-induced protein 11;	A0A1S3CKL8_CUCME,RecName: Full=Auxin-responsive protein {ECO:0000256|RuleBase:RU004549};
Cla012349	-1.046	0	0	0	--	--	--	ref|XP_022932803.1|	--	A0A0A0K8U6_CUCSA,SubName: Full=Abscisic stress ripening-like protein {ECO:0000313|EMBL:KGN45863.1};
Cla012368	-1.102	0	0	0	GO:0009507,chloroplast; GO:0009941,chloroplast envelope; GO:0009534,chloroplast thylakoid; GO:0009535,chloroplast thylakoid membrane; GO:0016021,integral component of membrane; GO:0016020,membrane; GO:0009522,photosystem I; GO:0009783,photosystem II antenna complex; GO:0010287,plastoglobule; GO:0009517,PSII associated light-harvesting complex II; GO:0009579,thylakoid; GO:0042651,thylakoid membran…	K08916: LHCB5; light-harvesting complex II chlorophyll a/b binding protein 5	At4g10340	ref|XP_004141516.1|	CB5_ARATH,RecName: Full=Chlorophyll a-b binding protein CP26, chloroplastic; AltName: Full=LHCB5; AltName: Full=LHCIIc; AltName: Full=Light-harvesting complex II protein 5; Flags: Precursor;	A0A0A0KXR5_CUCSA,RecName: Full=Chlorophyll a-b binding protein, chloroplastic {ECO:0000256|RuleBase:RU363080};
Cla012373	0	0	0	2.166	GO:0005783,endoplasmic reticulum; GO:0009408,response to heat	K13993: HSP20; HSP20 family protein	At4g10250	gb|ADU55793.1|	HSP22_ARATH,RecName: Full=22.0 kDa heat shock protein; Short=AtHsp22.0; Flags: Precursor;	H6TB46_CITLA,SubName: Full=HSP20.3 {ECO:0000313|EMBL:ADU55793.1};
Cla012478	-1.316	0	0	0	GO:0005618,cell wall; GO:0005576,extracellular region; GO:0005794,Golgi apparatus; GO:0009505,plant-type cell wall; GO:0005886,plasma membrane; GO:0009506,plasmodesma; GO:0008810,cellulase activity; GO:0071555,cell wall organization; GO:0030245,cellulose catabolic process	K01179: E3.2.1.4; endoglucanase [EC:3.2.1.4]	At1g71380	ref|XP_004141534.1|	GUN9_ARATH,RecName: Full=Endoglucanase 9; EC=3.2.1.4; AltName: Full=Cellulase 3; Short=AtCEL3; AltName: Full=Endo-1,4-beta glucanase 9; Flags: Precursor;	A0A0A0KW33_CUCSA,RecName: Full=Endoglucanase {ECO:0000256|RuleBase:RU361166}; EC=3.2.1.4 {ECO:0000256|RuleBase:RU361166};
Cla012491	-1.892	0	0	0	--	--	At1g72100	ref|XP_004141640.2|	--	A0A0A0KSX1_CUCSA,SubName: Full=Uncharacterized protein {ECO:0000313|EMBL:KGN52683.1};
Cla012528	0	1.389	0	-1.478	GO:0005789,endoplasmic reticulum membrane; GO:0016021,integral component of membrane; GO:0031090,organelle membrane; GO:0020037,heme binding; GO:0005506,iron ion binding; GO:0004497,monooxygenase activity; GO:0016705,oxidoreductase activity, acting on paired donors, with incorporation or reduction of molecular oxygen; GO:0009835,fruit ripening	K20623: CYP92A6; typhasterol/6-deoxotyphasterol 2alpha-hydroxylase	At5g07990	ref|XP_008460308.1|	C71A1_PERAE,RecName: Full=Cytochrome P450 71A1; EC=1.14.-.-; AltName: Full=ARP-2; AltName: Full=CYPLXXIA1;	A0A1S3CCA6_CUCME,SubName: Full=cytochrome P450 71A1-like {ECO:0000313|RefSeq:XP_008460308.1};
Cla012540	-1.014	0	0	0	GO:0005777,peroxisome; GO:0010181,FMN binding; GO:0052853,long-chain-(S)-2-hydroxy-long-chain-acid oxidase activity; GO:0052854,medium-chain-(S)-2-hydroxy-acid oxidase activity; GO:0052852,very-long-chain-(S)-2-hydroxy-acid oxidase activity; GO:0042742,defense response to bacterium; GO:0050665,hydrogen peroxide biosynthetic process; GO:0009854,oxidative photosynthetic carbon pathway	K11517: HAO; (S)-2-hydroxy-acid oxidase [EC:1.1.3.15]	At3g14130	ref|XP_008460326.1|	GLO4_ARATH,RecName: Full=Peroxisomal (S)-2-hydroxy-acid oxidase GLO4; EC=1.1.3.15; AltName: Full=Glycolate oxidase 4; Short=AtGLO4; Short=GOX 4; AltName: Full=Short chain alpha-hydroxy acid oxidase GLO4;	A0A1S3CC80_CUCME,SubName: Full=peroxisomal (S)-2-hydroxy-acid oxidase GLO4-like {ECO:0000313|RefSeq:XP_008460326.1};
Cla012544	-1.585	0	0	0	GO:0009734,auxin-activated signaling pathway; GO:0040008,regulation of growth	--	At1g72430	ref|XP_022955880.1|	SAU50_ARATH,RecName: Full=Auxin-responsive protein SAUR50 {ECO:0000303|PubMed:12036261}; AltName: Full=Protein SMALL AUXIN UP RNA 50 {ECO:0000303|PubMed:12036261};	A0A0A0LBZ7_CUCSA,SubName: Full=Uncharacterized protein {ECO:0000313|EMBL:KGN58464.1};
Cla012545	-1.349	0	0	0	GO:0005737,cytoplasm; GO:0009408,response to heat; GO:0009644,response to high light intensity; GO:0042542,response to hydrogen peroxide	--	At1g54050	gb|ADU55780.1|	HS174_ARATH,RecName: Full=17.4 kDa class III heat shock protein; AltName: Full=17.4 kDa heat shock protein 2; Short=AtHsp17.4B;	H6TB33_CITLA,SubName: Full=HSP19 {ECO:0000313|EMBL:ADU55780.1};
Cla012562	0	2.253	0	-1.233	--	--	At3g14360	ref|XP_008463982.1|	--	A0A1S3CKY2_CUCME,SubName: Full=uncharacterized protein LOC103501974 isoform X1 {ECO:0000313|RefSeq:XP_008463982.1};
Cla012570	0	1.856	0	0	GO:0005789,endoplasmic reticulum membrane; GO:0016021,integral component of membrane; GO:0016020,membrane; GO:0016711,flavonoid 3'-monooxygenase activity; GO:0020037,heme binding; GO:0005506,iron ion binding; GO:0009813,flavonoid biosynthetic process; GO:0009733,response to auxin; GO:0044550,secondary metabolite biosynthetic process	K20623: CYP92A6; typhasterol/6-deoxotyphasterol 2alpha-hydroxylase	At5g07990	ref|XP_008463991.1|	F3PH_ARATH,RecName: Full=Flavonoid 3'-monooxygenase; EC=1.14.13.21; AltName: Full=Cytochrome P450 75B1; AltName: Full=Flavonoid 3'-hydroxylase; Short=AtF3'H; AltName: Full=Protein TRANSPARENT TESTA 7;	A0A1S3CKG3_CUCME,SubName: Full=cytochrome P450 71A1-like {ECO:0000313|RefSeq:XP_008463991.1};
Cla012576	0	1.218	0	0	--	--	--	gb|KGN58501.1|	--	A0A0A0LEN3_CUCSA,SubName: Full=Uncharacterized protein {ECO:0000313|EMBL:KGN58501.1};
Cla012578	-1.131	0	0	0	GO:0005634,nucleus; GO:0005524,ATP binding; GO:0048366,leaf development; GO:0006355,regulation of transcription, DNA-templated; GO:0006351,transcription, DNA-templated	--	At3g13960	ref|XP_023525289.1|	GRF5_ARATH,RecName: Full=Growth-regulating factor 5; Short=AtGRF5; AltName: Full=Transcription activator GRF5;	A0A0A0LCW4_CUCSA,SubName: Full=Uncharacterized protein {ECO:0000313|EMBL:KGN58502.1};
Cla012580	-2.072	0	0	0	GO:0005634,nucleus; GO:0003677,DNA binding; GO:0003700,DNA binding transcription factor activity; GO:0009873,ethylene-activated signaling pathway; GO:0007275,multicellular organism development; GO:0006351,transcription, DNA-templated	K09285: OVM, ANT; AP2-like factor, ANT lineage	At1g72570	ref|XP_008463998.1|	AIL1_ARATH,RecName: Full=AP2-like ethylene-responsive transcription factor AIL1; AltName: Full=Protein AINTEGUMENTA-LIKE 1;	A0A1S3CKZ7_CUCME,SubName: Full=AP2-like ethylene-responsive transcription factor AIL1 {ECO:0000313|RefSeq:XP_008463998.1};
Cla012597	-1.032	0	0	0	GO:0005737,cytoplasm; GO:0005634,nucleus; GO:0046872,metal ion binding; GO:0004722,protein serine/threonine phosphatase activity; GO:0009738,abscisic acid-activated signaling pathway	K14497: PP2C; protein phosphatase 2C [EC:3.1.3.16]	At1g72770	ref|XP_008447624.1|	P2C16_ARATH,RecName: Full=Protein phosphatase 2C 16; Short=AtPP2C16; EC=3.1.3.16; AltName: Full=AtP2C-HA; AltName: Full=Protein HYPERSENSITIVE TO ABA 1; AltName: Full=Protein phosphatase 2C HAB1; Short=PP2C HAB1; Flags: Precursor;	E5GB90_CUCME,SubName: Full=Protein phosphatase 2c {ECO:0000313|EMBL:ADN33732.1};
Cla012617	0	0	0	-1.504	GO:0005886,plasma membrane; GO:0005509,calcium ion binding; GO:0070290,N-acylphosphatidylethanolamine-specific phospholipase D activity; GO:0004630,phospholipase D activity; GO:0051301,cell division; GO:0006995,cellular response to nitrogen starvation; GO:0016036,cellular response to phosphate starvation; GO:0051365,cellular response to potassium ion starvation; GO:0009825,multidimensional cell g…	K01115: PLD1_2; phospholipase D1/2 [EC:3.1.4.4]	At1g55180	ref|XP_008447602.1|	PLDA4_ARATH,RecName: Full=Phospholipase D alpha 4 {ECO:0000303|PubMed:11891260}; Short=AtPLDalpha4 {ECO:0000303|PubMed:11891260}; Short=PLD alpha 4 {ECO:0000303|PubMed:11891260}; EC=3.1.4.4 {ECO:0000250|UniProtKB:Q38882}; AltName: Full=PLDalpha3; AltName: Full=Phospholipase D epsilon {ECO:0000303|PubMed:19143999}; Short=AtPLDepsilon {ECO:0000303|PubMed:19143999}; Short=PLD epsilon {ECO:0000303|Pu…	A0A1S3BH90_CUCME,RecName: Full=Phospholipase D {ECO:0000256|PIRNR:PIRNR036470}; EC=3.1.4.4 {ECO:0000256|PIRNR:PIRNR036470};
Cla012621	-1.245	0	0	0	GO:0005634,nucleus; GO:0003700,DNA binding transcription factor activity; GO:0046872,metal ion binding; GO:0044212,transcription regulatory region DNA binding; GO:0006355,regulation of transcription, DNA-templated; GO:0010200,response to chitin; GO:0006351,transcription, DNA-templated	--	At1g51700	gb|KGN59833.1|	DOF17_ARATH,RecName: Full=Dof zinc finger protein DOF1.7; Short=AtDOF1.7;	A0A0A0LDG2_CUCSA,SubName: Full=Uncharacterized protein {ECO:0000313|EMBL:KGN59833.1};
Cla012629	1.438	0	0	0	--	--	At4g14100	ref|XP_011652367.1|	FBL74_ARATH,RecName: Full=F-box/LRR-repeat protein At4g14096;	A0A0A0LGC1_CUCSA,SubName: Full=Uncharacterized protein {ECO:0000313|EMBL:KGN59842.1};
Cla012633	0	1.191	0	0	GO:0005634,nucleus; GO:0003677,DNA binding; GO:0003700,DNA binding transcription factor activity; GO:0046983,protein dimerization activity; GO:0006355,regulation of transcription, DNA-templated; GO:0006351,transcription, DNA-templated	--	At3g21330	ref|XP_004146860.1|	BH087_ARATH,RecName: Full=Transcription factor bHLH87; AltName: Full=Basic helix-loop-helix protein 87; Short=AtbHLH87; Short=bHLH 87; AltName: Full=Transcription factor EN 121; AltName: Full=bHLH transcription factor bHLH087;	A0A0A0LDH7_CUCSA,SubName: Full=Uncharacterized protein {ECO:0000313|EMBL:KGN59848.1};
Cla012645	-1.403	0	0	0	GO:0005737,cytoplasm; GO:0005856,cytoskeleton; GO:0003779,actin binding	K05759: PFN; profilin	At2g19760	ref|XP_008447563.1|	PROF_PYRCO,RecName: Full=Profilin; AltName: Full=Allergen Pyr c 3; AltName: Allergen=Pyr c 4;	A0A1S3BHQ2_CUCME,RecName: Full=Profilin {ECO:0000256|RuleBase:RU003909};
Cla012660	1.929	0	0	0	--	--	At1g52140	ref|XP_016900382.1|	--	A0A1S4DWM0_CUCME,SubName: Full=uncharacterized protein LOC103490087 {ECO:0000313|RefSeq:XP_016900382.1};
Cla012670	-1.288	0	0	0	GO:0009535,chloroplast thylakoid membrane; GO:0016021,integral component of membrane; GO:0009538,photosystem I reaction center; GO:0015979,photosynthesis	--	At1g52230	ref|XP_011651500.1|	PSAH_BRACM,RecName: Full=Photosystem I reaction center subunit VI, chloroplastic; Short=PSI-H; AltName: Full=Light-harvesting complex I 11 kDa protein; Flags: Precursor;	A0A0A0LAW4_CUCSA,SubName: Full=Uncharacterized protein {ECO:0000313|EMBL:KGN58074.1};
Cla012686	1.937	0	0	0	GO:0005634,nucleus; GO:0009734,auxin-activated signaling pathway; GO:0006355,regulation of transcription, DNA-templated; GO:0006351,transcription, DNA-templated	K14484: IAA; auxin-responsive protein IAA	At3g15540	ref|XP_008447487.1|	AUX22_SOYBN,RecName: Full=Auxin-induced protein AUX22;	A0A1S3BHJ0_CUCME,RecName: Full=Auxin-responsive protein {ECO:0000256|RuleBase:RU004549};
Cla012699	-1.025	0	0	0	--	K15407: QTRTD1; queuine tRNA-ribosyltransferase subunit QTRTD1 [EC:2.4.2.29]	At3g15680	ref|XP_008454250.1|	--	A0A1S3BZE4_CUCME,SubName: Full=uncharacterized RNA-binding protein C17H9.04c-like {ECO:0000313|RefSeq:XP_008454250.1};
Cla012738	0	-1.186	0	0	--	--	At1g15760	ref|XP_004152186.1|	--	A0A0A0KVK9_CUCSA,SubName: Full=Uncharacterized protein {ECO:0000313|EMBL:KGN52924.1};
Cla012796	-1.197	0	0	0	--	--	--	ref|XP_011653021.1|	--	A0A0A0KYT1_CUCSA,SubName: Full=Uncharacterized protein {ECO:0000313|EMBL:KGN52991.1};
Cla012820	-1.822	0	0	0	GO:0005794,Golgi apparatus; GO:0000139,Golgi membrane; GO:0016021,integral component of membrane; GO:0005886,plasma membrane; GO:0016760,cellulose synthase (UDP-forming) activity; GO:0016759,cellulose synthase activity; GO:0071555,cell wall organization; GO:0030244,cellulose biosynthetic process; GO:0009833,plant-type primary cell wall biogenesis	--	At4g23990	gb|KFK43508.1|	CSLG3_ARATH,RecName: Full=Cellulose synthase-like protein G3; Short=AtCslG3; EC=2.4.1.-;	A0A087HN06_ARAAL,SubName: Full=Uncharacterized protein {ECO:0000313|EMBL:KFK43508.1};
Cla012895	0	0	0	-1.745	GO:0005576,extracellular region; GO:0004869,cysteine-type endopeptidase inhibitor activity; GO:0002020,protease binding; GO:0006952,defense response; GO:2000117,negative regulation of cysteine-type endopeptidase activity	--	--	gb|KGN43767.1|	CYT7_ORYSJ,RecName: Full=Putative cysteine proteinase inhibitor 7; AltName: Full=Oryzacystatin VII; Short=OC-VII; AltName: Full=Oryzacystatin-7; Flags: Precursor;	A0A0A0K644_CUCSA,RecName: Full=Cysteine proteinase inhibitor {ECO:0000256|RuleBase:RU362130};
Cla012936	0	0	-1.849	-3.279	GO:0005829,cytosol; GO:0008233,peptidase activity	K22314: GGP; glucosinolate gamma-glutamyl hydrolase [EC:3.4.19.16]	At2g23970	ref|XP_008455120.1|	GGP5_ARATH,RecName: Full=Gamma-glutamyl peptidase 5 {ECO:0000305}; EC=3.4.19.- {ECO:0000305};	A0A1S3BZR6_CUCME,SubName: Full=gamma-glutamyl peptidase 5-like {ECO:0000313|RefSeq:XP_008455120.1};
Cla012972	1.087	0	0	0	GO:0005783,endoplasmic reticulum; GO:0005768,endosome; GO:0005794,Golgi apparatus; GO:0000139,Golgi membrane; GO:0016021,integral component of membrane; GO:0005886,plasma membrane; GO:0005802,trans-Golgi network; GO:0016760,cellulose synthase (UDP-forming) activity; GO:0051753,mannan synthase activity; GO:0071555,cell wall organization; GO:0030244,cellulose biosynthetic process; GO:0071669,plant-…	K20924: CSLD; cellulose synthase-like protein [EC:2.4.1.-]	At3g03050	ref|XP_008459143.1|	CSLD3_ARATH,RecName: Full=Cellulose synthase-like protein D3; Short=AtCslD3; EC=2.4.1.-; AltName: Full=Protein KOJAK;	A0A1S3C9H4_CUCME,SubName: Full=cellulose synthase-like protein D3 {ECO:0000313|RefSeq:XP_008459143.1};
Cla012974	0	0	0	-1.652	GO:0016021,integral component of membrane; GO:0005524,ATP binding; GO:0016887,ATPase activity	--	At1g15520	ref|XP_008459146.1|	PDR1_TOBAC,RecName: Full=Pleiotropic drug resistance protein 1; AltName: Full=NtPDR1;	A0A1S3C903_CUCME,SubName: Full=pleiotropic drug resistance protein 1-like {ECO:0000313|RefSeq:XP_008459146.1};
Cla013036	3.746	0	0	0	--	--	At1g07750	gb|KGN57581.1|	--	A0A0A0LC21_CUCSA,SubName: Full=Uncharacterized protein {ECO:0000313|EMBL:KGN57581.1};
Cla013044	-1.132	0	0	0	--	--	At1g77700	ref|XP_004149961.1|	TLPH_ARATH,RecName: Full=Thaumatin-like protein; Flags: Precursor;	A0A0A0LAB7_CUCSA,SubName: Full=Uncharacterized protein {ECO:0000313|EMBL:KGN57567.1};
Cla013063	-2.807	0	0	0	GO:0005634,nucleus; GO:0003677,DNA binding; GO:0003700,DNA binding transcription factor activity; GO:0051301,cell division; GO:0050832,defense response to fungus; GO:0009873,ethylene-activated signaling pathway; GO:0010087,phloem or xylem histogenesis; GO:0010200,response to chitin; GO:0006351,transcription, DNA-templated	--	At4g34410	ref|XP_008456122.1|	EF109_ARATH,RecName: Full=Ethylene-responsive transcription factor ERF109;	A0A1S3C3R9_CUCME,SubName: Full=ethylene-responsive transcription factor ERF109 {ECO:0000313|RefSeq:XP_008456122.1};
Cla013088	0	0	0	-1.327	GO:0005576,extracellular region	--	At3g19320	ref|XP_008456145.1|	Y4744_ARATH,RecName: Full=Uncharacterized protein At4g06744; Flags: Precursor;	A0A1S3C2N3_CUCME,SubName: Full=uncharacterized protein At4g06744-like {ECO:0000313|RefSeq:XP_008456145.1};
Cla013089	0	0	0	1.164	GO:0005576,extracellular region	--	At3g19320	ref|XP_004140710.1|	Y4744_ARATH,RecName: Full=Uncharacterized protein At4g06744; Flags: Precursor;	A0A0A0LA86_CUCSA,SubName: Full=Uncharacterized protein {ECO:0000313|EMBL:KGN57507.1};
Cla013110	-1.807	0	0	1.244	GO:0016874,ligase activity; GO:0009733,response to auxin	K14487: GH3; auxin responsive GH3 gene family	At2g14960	ref|XP_008465614.1|	GH31_ARATH,RecName: Full=Probable indole-3-acetic acid-amido synthetase GH3.1; EC=6.3.2.-; AltName: Full=Auxin-responsive GH3-like protein 1; Short=AtGH3-1;	A0A1S3CP72_CUCME,SubName: Full=probable indole-3-acetic acid-amido synthetase GH3.1 {ECO:0000313|RefSeq:XP_008465614.1};
Cla013135	0	1.147	0	0	GO:0005783,endoplasmic reticulum; GO:0004190,aspartic-type endopeptidase activity; GO:0008233,peptidase activity; GO:0012501,programmed cell death; GO:0030163,protein catabolic process	--	At5g37540	ref|XP_008457122.1|	PCS1L_ARATH,RecName: Full=Aspartic proteinase PCS1; EC=3.4.23.-; AltName: Full=Aspartic protease 38; Short=AtASP38; AltName: Full=Protein EMBRYO DEFECTIVE 24; AltName: Full=Protein PROMOTION OF CELL SURVIVAL 1; Flags: Precursor;	A0A1S3C4D2_CUCME,SubName: Full=aspartic proteinase PCS1 {ECO:0000313|RefSeq:XP_008457122.1};
Cla013215	-1.239	0	0	0	--	K09422: MYBP; transcription factor MYB, plant	--	ref|XP_022983287.1|	--	A0A1S3C586_CUCME,SubName: Full=protein ODORANT1 {ECO:0000313|RefSeq:XP_008457024.1};
Cla013228	0	0	0	-1.3	GO:0005634,nucleus; GO:0003700,DNA binding transcription factor activity; GO:0043565,sequence-specific DNA binding; GO:0000989,transcription factor activity, transcription factor binding; GO:0009740,gibberellic acid mediated signaling pathway; GO:0042538,hyperosmotic salinity response; GO:0009867,jasmonic acid mediated signaling pathway; GO:0009938,negative regulation of gibberellic acid mediated…	K14494: DELLA; DELLA protein	At2g01570	emb|CCG14222.1|	GAI_SOLLC,RecName: Full=DELLA protein GAI; AltName: Full=Gibberellic acid-insensitive mutant protein;	W6JXD4_CUCSA,SubName: Full=Gibberellin DELLA protein {ECO:0000313|EMBL:CCG14222.1};
Cla013273	-1.539	0	0	-2.556	GO:0016021,integral component of membrane; GO:0005509,calcium ion binding; GO:0050664,oxidoreductase activity, acting on NAD(P)H, oxygen as acceptor; GO:0004601,peroxidase activity	K13411: DUOX, THOX; dual oxidase [EC:1.6.3.1 1.11.1.-]	At5g60010	ref|XP_008463856.1|	RBOHH_ARATH,RecName: Full=Putative respiratory burst oxidase homolog protein H; EC=1.11.1.-; EC=1.6.3.-; AltName: Full=NADPH oxidase RBOHH; Short=AtRBOHH;	A0A1S3CK94_CUCME,SubName: Full=putative respiratory burst oxidase homolog protein H {ECO:0000313|RefSeq:XP_008463856.1};
Cla013276	-1.133	0	0	0	GO:0005576,extracellular region; GO:0009506,plasmodesma	--	At2g41470_1	ref|XP_008463858.1|	ATS3A_ARATH,RecName: Full=Embryo-specific protein ATS3A {ECO:0000305}; AltName: Full=Protein ARABIDOPSIS THALIANA SEED 3A {ECO:0000305}; Flags: Precursor;	A0A1S3CK61_CUCME,SubName: Full=uncharacterized protein LOC103501893 {ECO:0000313|RefSeq:XP_008463858.1};
Cla013282	0	2.856	0	-1.018	GO:0005634,nucleus; GO:0003700,DNA binding transcription factor activity; GO:0046872,metal ion binding; GO:0043565,sequence-specific DNA binding; GO:0009631,cold acclimation; GO:0042538,hyperosmotic salinity response; GO:0009643,photosynthetic acclimation; GO:0010200,response to chitin; GO:0009409,response to cold; GO:0009408,response to heat; GO:0009416,response to light stimulus; GO:0006979,res…	--	At5g59820	ref|XP_023512019.1|	ZAT12_ARATH,RecName: Full=Zinc finger protein ZAT12; AltName: Full=Protein RESPONSIVE TO HIGH LIGHT 41;	A0A1S3BJI5_CUCME,SubName: Full=zinc finger protein ZAT11 {ECO:0000313|RefSeq:XP_008448374.1};
Cla013294	1.107	0	0	0	--	--	At1g07650	ref|XP_008448396.1|	--	A0A1S3BK80_CUCME,SubName: Full=uncharacterized protein LOC103490595 {ECO:0000313|RefSeq:XP_008448396.1};
Cla013297	0	1.218	0	-1.209	--	--	--	ref|XP_008448399.1|	--	A0A1S3BJL9_CUCME,SubName: Full=dof zinc finger protein DOF3.6 {ECO:0000313|RefSeq:XP_008448399.1};
Cla013329	-1.092	0	0	0	GO:0009507,chloroplast; GO:0009941,chloroplast envelope; GO:0042644,chloroplast nucleoid; GO:0009534,chloroplast thylakoid; GO:0009535,chloroplast thylakoid membrane; GO:0016020,membrane; GO:0009295,nucleoid; GO:0009508,plastid chromosome; GO:0098572,stromal side of plastid thylakoid membrane; GO:0007623,circadian rhythm	--	At3g46780	ref|XP_004143209.2|	PTA16_ARATH,RecName: Full=Protein plastid transcriptionally active 16, chloroplastic {ECO:0000303|PubMed:16326926}; Short=pTAC16 {ECO:0000303|PubMed:16326926}; Flags: Precursor;	A0A0A0KC77_CUCSA,SubName: Full=Uncharacterized protein {ECO:0000313|EMBL:KGN47123.1};
Cla013360	-3.328	0	0	-2.838	GO:0016021,integral component of membrane; GO:0005886,plasma membrane; GO:0009506,plasmodesma; GO:0005524,ATP binding; GO:0042626,ATPase activity, coupled to transmembrane movement of substances; GO:0006855,drug transmembrane transport	--	At2g29940	ref|XP_011657127.1|	AB31G_ARATH,RecName: Full=ABC transporter G family member 31; Short=ABC transporter ABCG.31; Short=AtABCG31; AltName: Full=Pleiotropic drug resistance protein 3;	A0A0A0KC51_CUCSA,SubName: Full=Uncharacterized protein {ECO:0000313|EMBL:KGN47083.1};
Cla013371	-3.372	0	0	0	GO:0004066,asparagine synthase (glutamine-hydrolyzing) activity; GO:0005524,ATP binding; GO:0042803,protein homodimerization activity; GO:0006529,asparagine biosynthetic process; GO:0009063,cellular amino acid catabolic process; GO:0043617,cellular response to sucrose starvation; GO:0006541,glutamine metabolic process; GO:0070981,L-asparagine biosynthetic process; GO:0009646,response to absence o…	K01953: asnB, ASNS; asparagine synthase (glutamine-hydrolysing) [EC:6.3.5.4]	At3g47340	ref|XP_004143163.1|	ASNS1_ARATH,RecName: Full=Asparagine synthetase [glutamine-hydrolyzing] 1; EC=6.3.5.4; AltName: Full=Glutamine-dependent asparagine synthetase 1; AltName: Full=Protein DARK INDUCIBLE 6;	A0A0A0KF94_CUCSA,SubName: Full=Uncharacterized protein {ECO:0000313|EMBL:KGN47067.1};
Cla013376	-1.1	0	0	0	GO:0005829,cytosol; GO:0051087,chaperone binding; GO:0009409,response to cold; GO:0009651,response to salt stress; GO:0010228,vegetative to reproductive phase transition of meristem	--	At3g51780	ref|XP_011657121.1|	BAG4_ARATH,RecName: Full=BAG family molecular chaperone regulator 4; AltName: Full=Bcl-2-associated athanogene 4;	A0A0A0KBL2_CUCSA,SubName: Full=Uncharacterized protein {ECO:0000313|EMBL:KGN47060.1};
Cla013387	-1.208	0	0	0	GO:0043231,intracellular membrane-bounded organelle; GO:0080043,quercetin 3-O-glucosyltransferase activity; GO:0080044,quercetin 7-O-glucosyltransferase activity; GO:0008152,metabolic process	--	At2g30150	ref|XP_004143169.1|	U87A1_ARATH,RecName: Full=UDP-glycosyltransferase 87A1; EC=2.4.1.-;	A0A0A0KH18_CUCSA,SubName: Full=Uncharacterized protein {ECO:0000313|EMBL:KGN47051.1};
Cla013418	0	-1.026	0	0	GO:0005634,nucleus; GO:0003677,DNA binding; GO:0003700,DNA binding transcription factor activity; GO:0006351,transcription, DNA-templated	--	At2g40620	ref|XP_004140027.1|	RF2B_ORYSJ,RecName: Full=Transcription factor RF2b;	A0A0A0KD34_CUCSA,SubName: Full=Uncharacterized protein {ECO:0000313|EMBL:KGN46759.1};
Cla013424	0	0	0	-1.048	GO:0005634,nucleus; GO:0003677,DNA binding; GO:0003700,DNA binding transcription factor activity; GO:0006952,defense response; GO:0006351,transcription, DNA-templated	K13434: PTI6; pathogenesis-related genes transcriptional activator PTI6	At4g27950	ref|XP_016901953.1|	PTI6_SOLLC,RecName: Full=Pathogenesis-related genes transcriptional activator PTI6; AltName: Full=PTO-interacting protein 6;	A0A1S4E155_CUCME,SubName: Full=ethylene-responsive transcription factor ERF069-like {ECO:0000313|RefSeq:XP_016901953.1};
Cla013463	-1.769	0	0	0	GO:0005737,cytoplasm; GO:0009734,auxin-activated signaling pathway; GO:0007275,multicellular organism development; GO:0040008,regulation of growth	K14488: SAUR; SAUR family protein	At3g12830	ref|XP_008456308.1|	SAU72_ARATH,RecName: Full=Auxin-responsive protein SAUR72 {ECO:0000305}; AltName: Full=Protein SMALL AUXIN UP RNA 72 {ECO:0000303|PubMed:12036261};	A0A1S3C2X3_CUCME,SubName: Full=auxin-responsive protein SAUR71 {ECO:0000313|RefSeq:XP_008456308.1};
Cla013479	-1.372	0	0	0	GO:0005634,nucleus; GO:0046872,metal ion binding; GO:0016740,transferase activity; GO:0006952,defense response; GO:0043161,proteasome-mediated ubiquitin-dependent protein catabolic process; GO:0043067,regulation of programmed cell death	K19042: BOI; E3 ubiquitin-protein ligase BOI and related proteins [EC:2.3.2.27]	At3g12920	ref|XP_008456341.1|	BRG3_ARATH,RecName: Full=Probable BOI-related E3 ubiquitin-protein ligase 3; EC=2.3.2.27 {ECO:0000250|UniProtKB:Q9FHE4}; AltName: Full=RING-type E3 ubiquitin transferase BRG3 {ECO:0000305};	A0A1S3C2Z7_CUCME,SubName: Full=probable BOI-related E3 ubiquitin-protein ligase 2 isoform X2 {ECO:0000313|RefSeq:XP_008456341.1};
Cla013492	-1.005	0	0	0	GO:0016021,integral component of membrane	--	At1g74520	ref|XP_008456366.1|	HA22F_ARATH,RecName: Full=HVA22-like protein f; Short=AtHVA22f;	A0A1S3C319_CUCME,RecName: Full=HVA22-like protein {ECO:0000256|RuleBase:RU362006};
Cla013532	0	0	0	-1.745	GO:0005634,nucleus; GO:0003677,DNA binding; GO:0003700,DNA binding transcription factor activity; GO:0046983,protein dimerization activity; GO:0006355,regulation of transcription, DNA-templated; GO:0006351,transcription, DNA-templated	--	At1g68810	ref|XP_008456426.1|	BH030_ARATH,RecName: Full=Transcription factor bHLH30; AltName: Full=Basic helix-loop-helix protein 30; Short=AtbHLH30; Short=bHLH 30; AltName: Full=Transcription factor EN 53; AltName: Full=bHLH transcription factor bHLH030;	A0A1S3C3W5_CUCME,SubName: Full=transcription factor bHLH30-like isoform X1 {ECO:0000313|RefSeq:XP_008456426.1};
Cla013533	0	0	0	-1.654	GO:0005789,endoplasmic reticulum membrane; GO:0016021,integral component of membrane	--	At2g20590	ref|XP_004149275.1|	RTNLQ_ARATH,RecName: Full=Reticulon-like protein B17; Short=AtRTNLB17;	A0A1S3BJV4_CUCME,RecName: Full=Reticulon-like protein {ECO:0000256|RuleBase:RU363132};
Cla013546	0	0	0	1.482	GO:0005829,cytosol; GO:0080130,L-phenylalanine:2-oxoglutarate aminotransferase activity; GO:0004838,L-tyrosine:2-oxoglutarate aminotransferase activity; GO:0030170,pyridoxal phosphate binding; GO:0009058,biosynthetic process; GO:0006520,cellular amino acid metabolic process; GO:0006559,L-phenylalanine catabolic process; GO:0006572,tyrosine catabolic process	K00815: TAT; tyrosine aminotransferase [EC:2.6.1.5]	At5g36160	ref|XP_008448256.1|	TAT_ARATH,RecName: Full=Tyrosine aminotransferase; Short=TAT; EC=2.6.1.5; AltName: Full=L-tyrosine:2-oxoglutarate aminotransferase;	A0A1S3BK51_CUCME,SubName: Full=probable aminotransferase TAT2 {ECO:0000313|RefSeq:XP_008448256.1};
Cla013563	0	1.023	0	-1.602	--	--	At4g28290	ref|XP_022140652.1|	--	E0CTD2_VITVI,SubName: Full=Uncharacterized protein {ECO:0000313|EMBL:CBI21847.3};
Cla013585	1.311	0	0	0	--	--	At2g20830_2	ref|XP_004139959.1|	--	A0A0A0KAE4_CUCSA,SubName: Full=Uncharacterized protein {ECO:0000313|EMBL:KGN46695.1};
Cla013601	1.441	0	0	0	--	--	--	ref|XP_008460859.1|	--	A0A1S3CDF1_CUCME,SubName: Full=uncharacterized protein LOC103499607 {ECO:0000313|RefSeq:XP_008460859.1};
Cla013627	0	0	1.23	0	GO:0005789,endoplasmic reticulum membrane; GO:0005768,endosome; GO:0005794,Golgi apparatus; GO:0016021,integral component of membrane; GO:0005802,trans-Golgi network; GO:0005506,iron ion binding; GO:0031418,L-ascorbic acid binding; GO:0004656,procollagen-proline 4-dioxygenase activity	K00472: P4HA; prolyl 4-hydroxylase [EC:1.14.11.2]	At1g20270	ref|XP_008456388.1|	P4H3_ARATH,RecName: Full=Probable prolyl 4-hydroxylase 3 {ECO:0000305}; Short=AtP4H3 {ECO:0000303|Ref.5}; EC=1.14.11.2 {ECO:0000305};	A0A1S3C2P6_CUCME,SubName: Full=probable prolyl 4-hydroxylase 3 isoform X2 {ECO:0000313|RefSeq:XP_008456388.1};
Cla013661	-1.49	0	0	0	GO:0016021,integral component of membrane; GO:0005524,ATP binding; GO:0005509,calcium ion binding; GO:0009931,calcium-dependent protein serine/threonine kinase activity; GO:0005516,calmodulin binding; GO:0004683,calmodulin-dependent protein kinase activity; GO:0009877,nodulation; GO:0046777,protein autophosphorylation; GO:0009608,response to symbiont	K13412: CPK; calcium-dependent protein kinase [EC:2.7.11.1]	At3g10660	gb|KGN46077.1|	CCAMK_LOTJA,RecName: Full=Calcium and calcium/calmodulin-dependent serine/threonine-protein kinase; Short=LjCCaMK; EC=2.7.11.17;	A0A0A0KCH7_CUCSA,SubName: Full=Uncharacterized protein {ECO:0000313|EMBL:KGN46077.1};
Cla013681	-1.044	0	0	0	GO:0019538,protein metabolic process; GO:0006355,regulation of transcription, DNA-templated; GO:0006351,transcription, DNA-templated	--	At3g52490	ref|XP_008456620.1|	SMXL3_ARATH,RecName: Full=Protein SMAX1-LIKE 3 {ECO:0000303|PubMed:23893171}; Short=AtSMXL3 {ECO:0000303|PubMed:23893171};	A0A1S3C4C6_CUCME,SubName: Full=protein SMAX1-LIKE 3-like {ECO:0000313|RefSeq:XP_008456620.1};
Cla013729	-1.477	0	0	0	--	--	--	--	--	--
Cla013774	0	0	0	-1.897	--	K03834: tyrP; tyrosine-specific transport protein	At5g19500	ref|XP_016902005.1|	--	A0A1S4E201_CUCME,SubName: Full=tyrosine-specific transport protein 1-like isoform X1 {ECO:0000313|RefSeq:XP_016902005.1};
Cla013808	-1.701	0	0	0	--	--	--	ref|XP_004141007.1|	--	A0A0A0KBA4_CUCSA,SubName: Full=Uncharacterized protein {ECO:0000313|EMBL:KGN46124.1};
Cla013822	0	0	0	-1.278	GO:0016021,integral component of membrane; GO:0016020,membrane; GO:0005774,vacuolar membrane; GO:0005381,iron ion transmembrane transporter activity; GO:0005384,manganese ion transmembrane transporter activity; GO:0030026,cellular manganese ion homeostasis; GO:0071281,cellular response to iron ion; GO:0006880,intracellular sequestering of iron ion; GO:0071421,manganese ion transmembrane transport	K22736: VIT; vacuolar iron transporter family protein	At3g43660	ref|XP_008441522.1|	VITH4_ARATH,RecName: Full=Vacuolar iron transporter homolog 4; AltName: Full=Protein NODULIN-LIKE 4;	A0A1S3B368_CUCME,SubName: Full=vacuolar iron transporter homolog 4-like {ECO:0000313|RefSeq:XP_008441522.1};
Cla013835	-3.174	0	0	0	--	--	--	--	--	--
Cla013839	0	2.697	0	0	--	--	--	--	--	--
Cla013855	0	0	0	-1.558	GO:0006952,defense response; GO:0009607,response to biotic stimulus	--	At1g78780	ref|XP_011657303.1|	PRPX_HORVU,RecName: Full=Pathogen-related protein;	A0A0A0KF98_CUCSA,SubName: Full=Uncharacterized protein {ECO:0000313|EMBL:KGN47479.1};
Cla013862	1.306	1.048	0	0	GO:0009507,chloroplast; GO:0016020,membrane; GO:0045300,acyl-[acyl-carrier-protein] desaturase activity; GO:0046872,metal ion binding; GO:0102786,stearoyl-[acp] desaturase activity; GO:0006633,fatty acid biosynthetic process	K03921: FAB2, SSI2, desA1; acyl-[acyl-carrier-protein] desaturase [EC:1.14.19.2 1.14.19.11 1.14.19.26]	At1g43800	ref|XP_022993893.1|	STAD6_ARATH,RecName: Full=Stearoyl-[acyl-carrier-protein] 9-desaturase 6, chloroplastic; Short=Stearoyl-ACP desaturase 6; EC=1.14.19.2 {ECO:0000250|UniProtKB:P22337}; AltName: Full=Acyl-[acyl-carrier-protein] desaturase 6; Flags: Precursor;	A0A0A0KCQ9_CUCSA,RecName: Full=Acyl-[acyl-carrier-protein] desaturase {ECO:0000256|RuleBase:RU000582}; EC=1.14.19.- {ECO:0000256|RuleBase:RU000582};
Cla013865	1.409	0	0	0	GO:0005783,endoplasmic reticulum; GO:0005789,endoplasmic reticulum membrane; GO:0005887,integral component of plasma membrane; GO:0005886,plasma membrane; GO:0051119,sugar transmembrane transporter activity; GO:0051260,protein homooligomerization	K15382: SLC50A, SWEET; solute carrier family 50 (sugar transporter)	At1g21460	ref|XP_004150723.1|	SWET1_ARATH,RecName: Full=Bidirectional sugar transporter SWEET1 {ECO:0000303|PubMed:21107422}; Short=AtSWEET1 {ECO:0000303|PubMed:21107422}; AltName: Full=Protein SUGARS WILL EVENTUALLY BE EXPORTED TRANSPORTERS 1 {ECO:0000303|PubMed:21107422};	A0A0A0KFB0_CUCSA,RecName: Full=Bidirectional sugar transporter SWEET {ECO:0000256|RuleBase:RU910715};
Cla013877	0	0	0	-1.937	GO:0016021,integral component of membrane; GO:0005886,plasma membrane; GO:0005524,ATP binding; GO:0019901,protein kinase binding; GO:0004675,transmembrane receptor protein serine/threonine kinase activity; GO:0007166,cell surface receptor signaling pathway; GO:0006468,protein phosphorylation	--	At1g55200	ref|XP_011658439.1|	PEK13_ARATH,RecName: Full=Proline-rich receptor-like protein kinase PERK13; EC=2.7.11.1; AltName: Full=Proline-rich extensin-like receptor kinase 13; Short=AtPERK13; AltName: Full=Protein ROOT HAIR SPECIFIC 10;	A0A0A0KGP0_CUCSA,SubName: Full=Uncharacterized protein {ECO:0000313|EMBL:KGN47502.1};
Cla013901	0	0	0	-3.268	GO:0005509,calcium ion binding	K13448: CML; calcium-binding protein CML	At1g21550	ref|XP_008441608.1|	CML44_ARATH,RecName: Full=Probable calcium-binding protein CML44; AltName: Full=Calmodulin-like protein 44;	A0A1S3B3T2_CUCME,SubName: Full=probable calcium-binding protein CML44 {ECO:0000313|RefSeq:XP_008441608.1};
Cla013912	0	0	0	-1.454	GO:0016021,integral component of membrane; GO:0031965,nuclear membrane; GO:0005886,plasma membrane; GO:0015171,amino acid transmembrane transporter activity; GO:0015293,symporter activity; GO:0003333,amino acid transmembrane transport; GO:0015802,basic amino acid transport	K14209: SLC36A, PAT; solute carrier family 36 (proton-coupled amino acid transporter)	At1g77380	ref|XP_004149429.1|	AAP3_ARATH,RecName: Full=Amino acid permease 3; AltName: Full=Amino acid transporter AAP3;	A0A0A0KDB3_CUCSA,SubName: Full=Uncharacterized protein {ECO:0000313|EMBL:KGN47695.1};
Cla013922	-2.068	0	0	-1.386	GO:0005634,nucleus; GO:0003677,DNA binding; GO:0003700,DNA binding transcription factor activity; GO:0009788,negative regulation of abscisic acid-activated signaling pathway; GO:0009611,response to wounding; GO:0006351,transcription, DNA-templated	--	At1g01720	gb|AHJ38169.1|	NAC2_ARATH,RecName: Full=NAC domain-containing protein 2; Short=ANAC002;	W6GE41_9ROSI,SubName: Full=NAC domain transcription factor 2 {ECO:0000313|EMBL:AHJ38169.1};
Cla013951	0	0	0	-2.043	GO:0016021,integral component of membrane; GO:0005886,plasma membrane; GO:0015171,amino acid transmembrane transporter activity; GO:0032973,amino acid export across plasma membrane; GO:0080144,amino acid homeostasis; GO:0043090,amino acid import	--	At4g08290	ref|XP_004145365.2|	WTR31_ARATH,RecName: Full=WAT1-related protein At4g08290;	A0A0A0LKX4_CUCSA,RecName: Full=WAT1-related protein {ECO:0000256|RuleBase:RU363077};
Cla013952	-1.409	0	0	0	--	K09422: MYBP; transcription factor MYB, plant	--	ref|XP_004140978.2|	--	A0A0A0KC91_CUCSA,SubName: Full=Uncharacterized protein {ECO:0000313|EMBL:KGN45977.1};
Cla013954	-1.187	0	0	0	GO:0005783,endoplasmic reticulum; GO:0031965,nuclear membrane; GO:0009877,nodulation; GO:0006355,regulation of transcription, DNA-templated; GO:0006351,transcription, DNA-templated	--	At4g08250	ref|XP_008445682.1|	NSP2_MEDTR,RecName: Full=Nodulation-signaling pathway 2 protein;	A0A1S3BE54_CUCME,SubName: Full=nodulation-signaling pathway 2 protein {ECO:0000313|RefSeq:XP_008445682.1};
Cla013979	-1.239	0	0	0	GO:0005634,nucleus; GO:0003700,DNA binding transcription factor activity; GO:0000981,RNA polymerase II transcription factor activity, sequence-specific DNA binding; GO:0043565,sequence-specific DNA binding; GO:0001135,transcription factor activity, RNA polymerase II transcription factor recruiting; GO:0044212,transcription regulatory region DNA binding; GO:0030154,cell differentiation; GO:0019760…	K09422: MYBP; transcription factor MYB, plant	At4g37260	ref|XP_004141899.1|	MYB73_ARATH,RecName: Full=Transcription factor MYB73 {ECO:0000303|PubMed:11597504}; AltName: Full=Myb-related protein 73 {ECO:0000303|PubMed:11597504}; Short=AtMYB73 {ECO:0000303|PubMed:11597504};	A0A0A0KJL5_CUCSA,SubName: Full=Sucrose responsive element binding protein {ECO:0000313|EMBL:KGN48557.1};
Cla013983	-1.924	0	0	0	--	--	--	--	--	--
Cla013990	6.631	0	0	0	GO:0016874,ligase activity; GO:0009733,response to auxin	K14487: GH3; auxin responsive GH3 gene family	At4g37390	ref|XP_023543141.1|	GH31_ARATH,RecName: Full=Probable indole-3-acetic acid-amido synthetase GH3.1; EC=6.3.2.-; AltName: Full=Auxin-responsive GH3-like protein 1; Short=AtGH3-1;	A0A1S3B1M0_CUCME,SubName: Full=probable indole-3-acetic acid-amido synthetase GH3.1 {ECO:0000313|RefSeq:XP_008440334.1};
Cla013995	1.801	0	0	0	GO:0005618,cell wall; GO:0005576,extracellular region; GO:0006952,defense response	--	At2g14900	ref|XP_008440339.1|	SNAK1_SOLTU,RecName: Full=Snakin-1; Flags: Precursor;	A0A1S3B1M5_CUCME,SubName: Full=peamaclein-like {ECO:0000313|RefSeq:XP_008440339.1};
Cla014000	-2.579	0	0	0	GO:0005829,cytosol; GO:0005634,nucleus; GO:0016787,hydrolase activity; GO:0009704,de-etiolation; GO:0009640,photomorphogenesis; GO:0080167,response to karrikin	--	At4g37470	ref|XP_004141889.1|	KAI2_ARATH,RecName: Full=Probable esterase KAI2; AltName: Full=Protein DWARF-14-like; Short=Protein D14-like; AltName: Full=Protein HYPOSENSITIVE TO LIGHT; AltName: Full=Protein KARRIKIN INSENSITIVE 2;	A0A0A0KLG6_CUCSA,SubName: Full=Uncharacterized protein {ECO:0000313|EMBL:KGN48581.1};
Cla014004	-1.392	0	0	0	--	--	At2g33690	ref|XP_023518886.1|	--	A0A1S4DTA9_CUCME,SubName: Full=uncharacterized protein LOC107990449 {ECO:0000313|RefSeq:XP_016899224.1};
Cla014022	0	1.525	0	0	GO:0005737,cytoplasm; GO:0005634,nucleus; GO:0019005,SCF ubiquitin ligase complex; GO:0005774,vacuolar membrane; GO:0005516,calmodulin binding; GO:0004402,histone acetyltransferase activity; GO:0003712,transcription cofactor activity; GO:0031625,ubiquitin protein ligase binding; GO:0008270,zinc ion binding; GO:0043161,proteasome-mediated ubiquitin-dependent protein catabolic process; GO:0042787,N…	--	At5g67480	ref|XP_023543323.1|	BT4_ARATH,RecName: Full=BTB/POZ and TAZ domain-containing protein 4; AltName: Full=BTB and TAZ domain protein 4;	A0A1S3B1L9_CUCME,SubName: Full=BTB/POZ and TAZ domain-containing protein 4 isoform X2 {ECO:0000313|RefSeq:XP_008440382.1};
Cla014029	0	0	0	1.214	GO:0005634,nucleus; GO:0003677,DNA binding; GO:0048262,determination of dorsal/ventral asymmetry; GO:0009908,flower development; GO:0006355,regulation of transcription, DNA-templated; GO:0006351,transcription, DNA-templated	--	At5g04760	ref|XP_022963148.1|	DIV_ANTMA,RecName: Full=Transcription factor DIVARICATA;	A0A0A0KJP9_CUCSA,SubName: Full=Uncharacterized protein {ECO:0000313|EMBL:KGN48612.1};
Cla014031	0	1.132	0	0	GO:0005783,endoplasmic reticulum; GO:0005789,endoplasmic reticulum membrane; GO:0005887,integral component of plasma membrane; GO:0016020,membrane; GO:0005886,plasma membrane; GO:0005524,ATP binding; GO:0015085,calcium ion transmembrane transporter activity; GO:0005388,calcium-transporting ATPase activity; GO:0005516,calmodulin binding; GO:0046872,metal ion binding; GO:0070588,calcium ion transme…	K01537: E3.6.3.8; Ca2+-transporting ATPase [EC:3.6.3.8]	At4g37640	ref|XP_004141983.1|	ACA2_ARATH,RecName: Full=Calcium-transporting ATPase 2, plasma membrane-type; EC=3.6.3.8; AltName: Full=Ca(2+)-ATPase isoform 2;	A0A0A0KII7_CUCSA,RecName: Full=Calcium-transporting ATPase {ECO:0000256|RuleBase:RU361146}; EC=3.6.3.8 {ECO:0000256|RuleBase:RU361146};
Cla014037	-1.216	0	0	0	--	--	At5g67620	ref|XP_004141857.1|	--	A0A0A0KLJ3_CUCSA,SubName: Full=Uncharacterized protein {ECO:0000313|EMBL:KGN48621.1};
Cla014047	0	2.182	0	0	GO:0031012,extracellular matrix; GO:0005794,Golgi apparatus; GO:0008083,growth factor activity; GO:0030154,cell differentiation; GO:0008283,cell proliferation; GO:0007275,multicellular organism development	--	At3g49780	ref|XP_023003386.1|	PSK3_ARATH,RecName: Full=Phytosulfokines 3; Short=AtPSK3; Contains: RecName: Full=Phytosulfokine-alpha; Short=PSK-alpha; Short=Phytosulfokine-a; Contains: RecName: Full=Phytosulfokine-beta; Short=PSK-beta; Short=Phytosulfokine-b; Flags: Precursor;	A0A0A0KLK0_CUCSA,SubName: Full=Uncharacterized protein {ECO:0000313|EMBL:KGN48631.1};
Cla014055	0	1.266	0	0	GO:0016021,integral component of membrane	K16302: CNNM; metal transporter CNNM	At4g33700	ref|XP_008440429.1|	Y2452_ARATH,RecName: Full=DUF21 domain-containing protein At2g14520; AltName: Full=CBS domain-containing protein CBSDUF3;	A0A1S3B147_CUCME,SubName: Full=DUF21 domain-containing protein At4g33700-like isoform X1 {ECO:0000313|RefSeq:XP_008440429.1};
Cla014085	0	0	-1.057	0	GO:0005634,nucleus; GO:0003677,DNA binding; GO:0003700,DNA binding transcription factor activity; GO:0046983,protein dimerization activity; GO:0045487,gibberellin catabolic process; GO:0007275,multicellular organism development; GO:0010371,regulation of gibberellin biosynthetic process; GO:0006351,transcription, DNA-templated	--	At5g65640	ref|XP_004143539.2|	BH093_ARATH,RecName: Full=Transcription factor bHLH93; AltName: Full=Basic helix-loop-helix protein 93; Short=AtbHLH93; Short=bHLH 93; AltName: Full=Transcription factor EN 47; AltName: Full=bHLH transcription factor bHLH093;	A0A0A0KG39_CUCSA,SubName: Full=Uncharacterized protein {ECO:0000313|EMBL:KGN48675.1};
Cla014092	0	0	0	-1.365	GO:0046029,mannitol dehydrogenase activity; GO:0008270,zinc ion binding	K00083: E1.1.1.195; cinnamyl-alcohol dehydrogenase [EC:1.1.1.195]	At4g37980	ref|NP_001267599.1|	MTDH_FRAAN,RecName: Full=Probable mannitol dehydrogenase; EC=1.1.1.255; AltName: Full=NAD-dependent mannitol dehydrogenase;	C1M2W0_CUCSA,SubName: Full=Somatic embryogenesis cinnamyl alcohol dehydrogenase 1 {ECO:0000313|EMBL:CAY19192.1};
Cla014096	1.568	0	0	0	GO:0043231,intracellular membrane-bounded organelle; GO:0080043,quercetin 3-O-glucosyltransferase activity; GO:0080044,quercetin 7-O-glucosyltransferase activity; GO:0008152,metabolic process	K18823: UGT91H4; soyasaponin III rhamnosyltransferase [EC:2.4.1.273]	At2g22590	ref|XP_008440527.1|	U91A1_ARATH,RecName: Full=UDP-glycosyltransferase 91A1; EC=2.4.1.-;	A0A1S3B1C8_CUCME,SubName: Full=UDP-glycosyltransferase 91A1-like {ECO:0000313|RefSeq:XP_008440527.1};
Cla014099	1.06	0	0	0	GO:0005524,ATP binding; GO:0004672,protein kinase activity; GO:0004842,ubiquitin-protein transferase activity	--	At5g65500	ref|XP_004143547.1|	PUB50_ARATH,RecName: Full=Putative U-box domain-containing protein 50; EC=2.3.2.27; AltName: Full=Plant U-box protein 50; AltName: Full=RING-type E3 ubiquitin transferase PUB50 {ECO:0000305};	A0A0A0KGN0_CUCSA,SubName: Full=Uncharacterized protein {ECO:0000313|EMBL:KGN48698.1};
Cla014126	0	1.091	0	0	--	--	--	ref|XP_004143556.1|	--	A0A0A0KK07_CUCSA,SubName: Full=Uncharacterized protein {ECO:0000313|EMBL:KGN48727.1};
Cla014155	0	0	0	2.861	GO:0005730,nucleolus; GO:0005634,nucleus; GO:0004805,trehalose-phosphatase activity; GO:0046686,response to cadmium ion; GO:0005992,trehalose biosynthetic process	K01087: otsB; trehalose 6-phosphate phosphatase [EC:3.1.3.12]	At5g65140	ref|XP_008440611.1|	TPPJ_ARATH,RecName: Full=Probable trehalose-phosphate phosphatase J; Short=AtTPPJ; EC=3.1.3.12; AltName: Full=Trehalose 6-phosphate phosphatase;	A0A1S3B246_CUCME,RecName: Full=Trehalose 6-phosphate phosphatase {ECO:0000256|RuleBase:RU361117}; EC=3.1.3.12 {ECO:0000256|RuleBase:RU361117};
Cla014161	-1.592	0	0	0	GO:0005737,cytoplasm; GO:0004512,inositol-3-phosphate synthase activity; GO:0006021,inositol biosynthetic process; GO:0008654,phospholipid biosynthetic process	K01858: INO1, ISYNA1; myo-inositol-1-phosphate synthase [EC:5.5.1.4]	At5g10170	ref|XP_008440628.1|	INO1_TOBAC,RecName: Full=Inositol-3-phosphate synthase; Short=MIP synthase; EC=5.5.1.4; AltName: Full=Myo-inositol 1-phosphate synthase; Short=IPS; Short=MI-1-P synthase;	A0A1S3B262_CUCME,SubName: Full=inositol-3-phosphate synthase {ECO:0000313|RefSeq:XP_008440628.1};
Cla014179	-1.961	0	0	0	GO:0016021,integral component of membrane; GO:0020037,heme binding; GO:0005506,iron ion binding; GO:0004497,monooxygenase activity; GO:0016705,oxidoreductase activity, acting on paired donors, with incorporation or reduction of molecular oxygen	K20562: CYP736A; biphenyl-4-hydroxylase	At5g57260	ref|XP_008440671.1|	C7A12_PANGI,RecName: Full=Cytochrome P450 CYP736A12; EC=1.14.-.-;	A0A1S3B1M7_CUCME,SubName: Full=cytochrome P450 CYP736A12-like {ECO:0000313|RefSeq:XP_008440671.1};
Cla014189	2.45	0	0	0	GO:0043231,intracellular membrane-bounded organelle; GO:0005634,nucleus; GO:0047209,coniferyl-alcohol glucosyltransferase activity; GO:0080043,quercetin 3-O-glucosyltransferase activity; GO:0080044,quercetin 7-O-glucosyltransferase activity; GO:0009808,lignin metabolic process; GO:0009636,response to toxic substance	K12356: UGT72E; coniferyl-alcohol glucosyltransferase [EC:2.4.1.111]	At3g50740	gb|KGN48805.1|	U72E1_ARATH,RecName: Full=UDP-glycosyltransferase 72E1; EC=2.4.1.-;	A0A0A0KGE4_CUCSA,SubName: Full=Uncharacterized protein {ECO:0000313|EMBL:KGN48805.1};
Cla014190	1.537	0	0	0	GO:0031225,anchored component of membrane; GO:0048046,apoplast; GO:0016021,integral component of membrane; GO:0008889,glycerophosphodiester phosphodiesterase activity; GO:0006071,glycerol metabolic process; GO:0006629,lipid metabolic process	--	At5g58170	ref|XP_008440682.1|	GPDL6_ARATH,RecName: Full=Glycerophosphodiester phosphodiesterase GDPDL6 {ECO:0000305}; EC=3.1.4.46 {ECO:0000250|UniProtKB:Q7Y208}; AltName: Full=Glycerophosphodiester phosphodiesterase-like 6 {ECO:0000303|PubMed:21323773}; Short=ATGDPDL6 {ECO:0000303|PubMed:21323773}; AltName: Full=Glycerophosphodiesterase-like 5 {ECO:0000303|PubMed:18718934}; AltName: Full=Protein SHV3-LIKE 4 {ECO:0000303|PubMe…	A0A1S3B2A5_CUCME,SubName: Full=glycerophosphodiester phosphodiesterase GDPDL6-like {ECO:0000313|RefSeq:XP_008440682.1};
Cla014193	-2.992	0	0	0	GO:0005634,nucleus; GO:0003700,DNA binding transcription factor activity; GO:0043565,sequence-specific DNA binding; GO:0009733,response to auxin; GO:0006351,transcription, DNA-templated	K09338: HD-ZIP; homeobox-leucine zipper protein	At4g36740	ref|XP_004143500.1|	ATB40_ARATH,RecName: Full=Homeobox-leucine zipper protein ATHB-40; AltName: Full=HD-ZIP protein ATHB-40; AltName: Full=Homeodomain transcription factor ATHB-40;	A0A0A0KGE8_CUCSA,SubName: Full=Uncharacterized protein {ECO:0000313|EMBL:KGN48810.1};
Cla014237	0	1.61	0	0	GO:0016021,integral component of membrane; GO:0005740,mitochondrial envelope; GO:0005741,mitochondrial outer membrane; GO:0005739,mitochondrion; GO:0005524,ATP binding; GO:0016887,ATPase activity; GO:0042802,identical protein binding; GO:0008219,cell death; GO:0009626,plant-type hypersensitive response; GO:0009617,response to bacterium; GO:0002237,response to molecule of bacterial origin; GO:0009…	K08900: BCS1; mitochondrial chaperone BCS1	At3g50930	ref|XP_004149989.1|	HSR4_ARATH,RecName: Full=Protein HYPER-SENSITIVITY-RELATED 4 {ECO:0000303|PubMed:15181213}; Short=AtHSR4 {ECO:0000303|PubMed:15181213}; EC=3.6.1.3 {ECO:0000250|UniProtKB:Q9FLD5}; AltName: Full=BCS1-like protein;	A0A0A0KH33_CUCSA,SubName: Full=Uncharacterized protein {ECO:0000313|EMBL:KGN48863.1};
Cla014243	0	1.039	0	0	GO:0005783,endoplasmic reticulum; GO:0016021,integral component of membrane; GO:0005524,ATP binding; GO:0016887,ATPase activity	K08900: BCS1; mitochondrial chaperone BCS1	At2g18190	ref|XP_022132940.1|	AATP3_ARATH,RecName: Full=AAA-ATPase At2g18193; EC=3.6.1.3 {ECO:0000250|UniProtKB:Q9FLD5};	A0A1S3B1F9_CUCME,SubName: Full=AAA-ATPase At2g18193-like {ECO:0000313|RefSeq:XP_008440767.1};
Cla014246	0	1.005	0	0	--	--	--	ref|XP_023543353.1|	--	A0A0A0KGK3_CUCSA,SubName: Full=Uncharacterized protein {ECO:0000313|EMBL:KGN48870.1};
Cla014254	1.292	0	-1.454	0	GO:0048046,apoplast; GO:0009505,plant-type cell wall; GO:0005773,vacuole; GO:0004565,beta-galactosidase activity; GO:0030246,carbohydrate binding; GO:0005975,carbohydrate metabolic process	--	At4g36360	ref|XP_008440778.1|	BGAL3_ARATH,RecName: Full=Beta-galactosidase 3; Short=Lactase 3; EC=3.2.1.23; Flags: Precursor;	A0A1S3B2N8_CUCME,RecName: Full=Beta-galactosidase {ECO:0000256|RuleBase:RU000675}; EC=3.2.1.23 {ECO:0000256|RuleBase:RU000675};
Cla014274	1.233	0	0	0	GO:0009734,auxin-activated signaling pathway; GO:0040008,regulation of growth	K14488: SAUR; SAUR family protein	At2g21220	ref|XP_008440807.1|	SAU50_ARATH,RecName: Full=Auxin-responsive protein SAUR50 {ECO:0000303|PubMed:12036261}; AltName: Full=Protein SMALL AUXIN UP RNA 50 {ECO:0000303|PubMed:12036261};	A0A1S3B1Z6_CUCME,SubName: Full=auxin-induced protein 15A {ECO:0000313|RefSeq:XP_008440807.1};
Cla014290	0	1.866	0	0	GO:0016021,integral component of membrane; GO:0005886,plasma membrane; GO:0005773,vacuole; GO:0005524,ATP binding; GO:0004674,protein serine/threonine kinase activity; GO:0006468,protein phosphorylation; GO:0009737,response to abscisic acid	K04733: IRAK4; interleukin-1 receptor-associated kinase 4 [EC:2.7.11.1]	At4g05200	ref|XP_023002933.1|	CRK29_ARATH,RecName: Full=Cysteine-rich receptor-like protein kinase 29; Short=Cysteine-rich RLK29; EC=2.7.11.-; Flags: Precursor;	A0A1S3AZK3_CUCME,SubName: Full=uncharacterized protein LOC103484586 {ECO:0000313|RefSeq:XP_008439953.2};
Cla014320	1.226	0	0	0	GO:0016021,integral component of membrane; GO:0005886,plasma membrane; GO:0005524,ATP binding; GO:0004674,protein serine/threonine kinase activity	K04733: IRAK4; interleukin-1 receptor-associated kinase 4 [EC:2.7.11.1]	At2g39360	gb|KGN48957.1|	Y2393_ARATH,RecName: Full=Probable receptor-like protein kinase At2g39360; EC=2.7.11.-; Flags: Precursor;	A0A0A0KKU7_CUCSA,SubName: Full=Uncharacterized protein {ECO:0000313|EMBL:KGN48957.1};
Cla014376	0	0	-1.141	0	GO:0016567,protein ubiquitination	--	At5g47800	ref|XP_008440966.1|	Y5780_ARATH,RecName: Full=BTB/POZ domain-containing protein At5g47800;	A0A1S3B2D3_CUCME,SubName: Full=BTB/POZ domain-containing protein At5g47800-like {ECO:0000313|RefSeq:XP_008440966.1, ECO:0000313|RefSeq:XP_008440967.1, ECO:0000313|RefSeq:XP_008440968.1};
Cla014392	2.638	0	-1.17	0	--	--	At3g09950	ref|XP_011658113.1|	--	A0A0A0KMW8_CUCSA,SubName: Full=Uncharacterized protein {ECO:0000313|EMBL:KGN49041.1};
Cla014404	-1.329	0	0	0	--	--	--	ref|XP_008440070.1|	--	A0A1S3B083_CUCME,SubName: Full=uncharacterized protein LOC103484658 {ECO:0000313|RefSeq:XP_008440070.1};
Cla014414	0	0	-1.406	0	GO:0009815,1-aminocyclopropane-1-carboxylate oxidase activity; GO:0031418,L-ascorbic acid binding; GO:0046872,metal ion binding; GO:0009693,ethylene biosynthetic process; GO:0009835,fruit ripening	K05933: E1.14.17.4; aminocyclopropanecarboxylate oxidase [EC:1.14.17.4]	At1g05010	ref|XP_008440054.1|	ACCO3_CUCME,RecName: Full=1-aminocyclopropane-1-carboxylate oxidase 3; Short=ACC oxidase 3; EC=1.14.17.4; AltName: Full=Ethylene-forming enzyme; Short=EFE;	A0A1S3B069_CUCME,SubName: Full=1-aminocyclopropane-1-carboxylate oxidase 3 {ECO:0000313|RefSeq:XP_008440054.1};
Cla014433	0	0	0	-2.243	GO:0005634,nucleus; GO:0003700,DNA binding transcription factor activity; GO:0043565,sequence-specific DNA binding; GO:0006351,transcription, DNA-templated	--	At4g04450	gb|AQX45438.1|	WRK31_ARATH,RecName: Full=Probable WRKY transcription factor 31; AltName: Full=WRKY DNA-binding protein 31;	A0A1S6YJD5_LUFAE,SubName: Full=WRKY transcription factor 2-like protein {ECO:0000313|EMBL:AQX45438.1};
Cla014443	-1.328	-1.568	-1.054	-1.351	GO:0009507,chloroplast; GO:0009570,chloroplast stroma; GO:0009536,plastid; GO:0051539,4 iron, 4 sulfur cluster binding; GO:0033741,adenylyl-sulfate reductase (glutathione) activity; GO:0009973,adenylyl-sulfate reductase activity; GO:0046872,metal ion binding; GO:0004604,phosphoadenylyl-sulfate reductase (thioredoxin) activity; GO:0045454,cell redox homeostasis; GO:0019344,cysteine biosynthetic pr…	K05907: APR; adenylyl-sulfate reductase (glutathione) [EC:1.8.4.9]	At4g21990_1	ref|XP_004134768.1|	APR1_ARATH,RecName: Full=5'-adenylylsulfate reductase 1, chloroplastic; EC=1.8.4.9; AltName: Full=3'-phosphoadenosine-5'-phosphosulfate reductase homolog 19; Short=PAPS reductase homolog 19; Short=Prh-19; AltName: Full=Adenosine 5'-phosphosulfate 5'-adenylylsulfate sulfotransferase 1; Short=APS sulfotransferase 1; AltName: Full=Thioredoxin-independent APS reductase 1; Flags: Precursor;	A0A0A0KHT4_CUCSA,SubName: Full=Uncharacterized protein {ECO:0000313|EMBL:KGN49103.1};
Cla014447	-1.141	0	0	0	--	K21437: ANKRD13; ankyrin repeat domain-containing protein 13	At1g62050	ref|XP_004134763.2|	--	A0A0A0KL75_CUCSA,SubName: Full=Uncharacterized protein {ECO:0000313|EMBL:KGN49107.1};
Cla014475	-1.026	0	0	0	GO:0016021,integral component of membrane; GO:0005886,plasma membrane; GO:0005524,ATP binding; GO:0004674,protein serine/threonine kinase activity; GO:0042742,defense response to bacterium; GO:0006468,protein phosphorylation	K04733: IRAK4; interleukin-1 receptor-associated kinase 4 [EC:2.7.11.1]	At4g38830	ref|XP_022977355.1|	CRK26_ARATH,RecName: Full=Cysteine-rich receptor-like protein kinase 26; Short=Cysteine-rich RLK26; EC=2.7.11.-; Flags: Precursor;	A0A2H5N1W5_CITUN,SubName: Full=Uncharacterized protein {ECO:0000313|EMBL:GAY34243.1};
Cla014481	0	0	0	-2.076	GO:0005730,nucleolus; GO:0005634,nucleus; GO:0004805,trehalose-phosphatase activity; GO:0046686,response to cadmium ion; GO:0005992,trehalose biosynthetic process	K01087: otsB; trehalose 6-phosphate phosphatase [EC:3.1.3.12]	At5g65140	ref|XP_016901461.1|	TPPJ_ARATH,RecName: Full=Probable trehalose-phosphate phosphatase J; Short=AtTPPJ; EC=3.1.3.12; AltName: Full=Trehalose 6-phosphate phosphatase;	A0A1S4DZR4_CUCME,RecName: Full=Trehalose 6-phosphate phosphatase {ECO:0000256|RuleBase:RU361117}; EC=3.1.3.12 {ECO:0000256|RuleBase:RU361117};
Cla014489	-1.272	0	0	0	GO:0005737,cytoplasm; GO:0004512,inositol-3-phosphate synthase activity; GO:0006021,inositol biosynthetic process; GO:0008654,phospholipid biosynthetic process	K01858: INO1, ISYNA1; myo-inositol-1-phosphate synthase [EC:5.5.1.4]	At2g22240	dbj|BAI52951.1|	INO1_SESIN,RecName: Full=Inositol-3-phosphate synthase; Short=MIP synthase; EC=5.5.1.4; AltName: Full=Myo-inositol 1-phosphate synthase; Short=IPS; Short=MI-1-P synthase;	D1MWZ1_CITLA,SubName: Full=Myo-inositol-1 phosphate synthase {ECO:0000313|EMBL:BAI52951.1};
Cla014491	0	0	-2.82	-3.202	GO:0005887,integral component of plasma membrane; GO:0008271,secondary active sulfate transmembrane transporter activity; GO:0015116,sulfate transmembrane transporter activity; GO:0015293,symporter activity; GO:1902358,sulfate transmembrane transport	K17469: SULTR2; sulfate transporter 2, low-affinity	At5g10180	ref|XP_008453779.1|	SUT21_ARATH,RecName: Full=Sulfate transporter 2.1; AltName: Full=AST68;	A0A1S3BX32_CUCME,SubName: Full=low affinity sulfate transporter 3-like {ECO:0000313|RefSeq:XP_008453779.1};
Cla014501	0	0	0	-1.111	GO:0005634,nucleus; GO:0003700,DNA binding transcription factor activity; GO:0043565,sequence-specific DNA binding; GO:0044212,transcription regulatory region DNA binding; GO:0042742,defense response to bacterium; GO:0006351,transcription, DNA-templated	K14431: TGA; transcription factor TGA	At5g65210	ref|XP_004149145.1|	TGA1_ARATH,RecName: Full=Transcription factor TGA1; AltName: Full=DNA-binding protein TGA1a-like protein; AltName: Full=bZIP transcription factor 47; Short=AtbZIP47;	A0A0A0KUL2_CUCSA,SubName: Full=Uncharacterized protein {ECO:0000313|EMBL:KGN53238.1};
Cla014507	-1.345	0	0	0	GO:0005634,nucleus; GO:0003700,DNA binding transcription factor activity; GO:0046982,protein heterodimerization activity; GO:0043565,sequence-specific DNA binding; GO:0006351,transcription, DNA-templated	K08065: NFYB; nuclear transcription Y subunit beta	At4g14540	ref|XP_008453748.1|	NFYB3_ARATH,RecName: Full=Nuclear transcription factor Y subunit B-3; Short=AtNF-YB-3; AltName: Full=Transcriptional activator HAP3C;	A0A1S3BY72_CUCME,SubName: Full=nuclear transcription factor Y subunit B-1-like {ECO:0000313|RefSeq:XP_008453748.1};
Cla014516	1.181	0	0	0	GO:0005634,nucleus; GO:0003677,DNA binding; GO:0006355,regulation of transcription, DNA-templated; GO:0006351,transcription, DNA-templated	--	At5g66770	ref|XP_008453739.1|	SCL7_POPEU,RecName: Full=SCARECROW-LIKE protein 7 {ECO:0000303|PubMed:20616154}; AltName: Full=PeSCL7 {ECO:0000303|PubMed:20616154};	A0A1S3BWG3_CUCME,SubName: Full=scarecrow-like protein 4 {ECO:0000313|RefSeq:XP_008453739.1};
Cla014529	-1.136	0	1.525	0	--	--	--	ref|XP_008453732.1|	--	A0A1S3BY57_CUCME,SubName: Full=transcription repressor OFP7 {ECO:0000313|RefSeq:XP_008453732.1};
Cla014562	0	1.017	0	0	GO:0048046,apoplast; GO:0009505,plant-type cell wall; GO:0005773,vacuole; GO:0004565,beta-galactosidase activity; GO:0030246,carbohydrate binding; GO:0005975,carbohydrate metabolic process	--	At4g36360	ref|XP_008452119.1|	BGAL3_ARATH,RecName: Full=Beta-galactosidase 3; Short=Lactase 3; EC=3.2.1.23; Flags: Precursor;	A0A1S3BSI3_CUCME,RecName: Full=Beta-galactosidase {ECO:0000256|RuleBase:RU000675}; EC=3.2.1.23 {ECO:0000256|RuleBase:RU000675};
Cla014570	-2.875	0	0	0	--	--	--	ref|XP_008452109.1|	--	A0A1S3BTX2_CUCME,SubName: Full=dehydrin DHN1 {ECO:0000313|RefSeq:XP_008452109.1};
Cla014571	-3.373	0	0	0	GO:0006950,response to stress; GO:0009415,response to water	--	--	ref|XP_011654339.1|	DHN1_PEA,RecName: Full=Dehydrin DHN1;	A0A0A0KUH6_CUCSA,SubName: Full=Uncharacterized protein {ECO:0000313|EMBL:KGN53290.1};
Cla014624	-1.228	0	0	0	--	--	At1g63310	ref|XP_023523114.1|	--	A0A0A0KUN4_CUCSA,SubName: Full=Uncharacterized protein {ECO:0000313|EMBL:KGN53335.1};
Cla014636	-1.019	0	0	0	GO:0009507,chloroplast; GO:0005737,cytoplasm; GO:0016791,phosphatase activity; GO:0043621,protein self-association; GO:0006468,protein phosphorylation; GO:0009231,riboflavin biosynthetic process	K22912: PYRP2; 5-amino-6-(5-phospho-D-ribitylamino)uracil phosphatase [EC:3.1.3.104]	At4g11570	ref|XP_004146524.1|	PYRP2_ARATH,RecName: Full=5-amino-6-(5-phospho-D-ribitylamino)uracil phosphatase, chloroplastic {ECO:0000303|PubMed:27490826}; Short=AtPyrP2 {ECO:0000303|PubMed:27490826}; EC=3.1.3.104 {ECO:0000269|PubMed:27490826}; AltName: Full=5-amino-6-ribitylamino-2,4(1H,3H)-pyrimidinedione 5'-phosphate phosphatase {ECO:0000305|PubMed:27490826}; Short=ARPP phosphatase {ECO:0000305|PubMed:27490826}; AltName: …	A0A0A0KY62_CUCSA,SubName: Full=Uncharacterized protein {ECO:0000313|EMBL:KGN53342.1};
Cla014691	-1.696	0	0	0	GO:0005737,cytoplasm; GO:0051537,2 iron, 2 sulfur cluster binding; GO:0009055,electron transfer activity; GO:0046872,metal ion binding; GO:0015035,protein disulfide oxidoreductase activity; GO:0045454,cell redox homeostasis	K03676: grxC, GLRX, GLRX2; glutaredoxin 3	At1g03020	ref|NP_001295830.1|	GRXS1_ARATH,RecName: Full=Monothiol glutaredoxin-S1; Short=AtGrxS1; AltName: Full=Protein ROXY 16;	A0A1S3BS02_CUCME,SubName: Full=monothiol glutaredoxin-S1-like {ECO:0000313|RefSeq:XP_008451626.1};
Cla014708	0	0	-1.763	0	--	--	At4g03130	ref|XP_022991718.1|	--	A0A0A0K7G0_CUCSA,SubName: Full=Uncharacterized protein {ECO:0000313|EMBL:KGN44834.1};
Cla014715	2.041	0	0	0	--	--	--	ref|XP_011659319.1|	--	A0A0A0K519_CUCSA,SubName: Full=Uncharacterized protein {ECO:0000313|EMBL:KGN44840.1};
Cla014721	0	0	0	-1.176	GO:0005737,cytoplasm; GO:0005634,nucleus; GO:0010331,gibberellin binding; GO:0016787,hydrolase activity; GO:0009056,catabolic process; GO:0048444,floral organ morphogenesis; GO:0048530,fruit morphogenesis; GO:0010476,gibberellin mediated signaling pathway; GO:0010629,negative regulation of gene expression; GO:1905516,positive regulation of fertilization; GO:0009939,positive regulation of gibberel…	K14493: GID1; gibberellin receptor GID1 [EC:3.-.-.-]	At3g63010	ref|XP_008451414.1|	GID1B_ARATH,RecName: Full=Gibberellin receptor GID1B; EC=3.-.-.-; AltName: Full=AtCXE14; AltName: Full=Carboxylesterase 14; AltName: Full=GID1-like protein 2; AltName: Full=Protein GA INSENSITIVE DWARF 1B; Short=AtGID1B;	A0A1S3BSI9_CUCME,SubName: Full=gibberellin receptor GID1B {ECO:0000313|RefSeq:XP_008451414.1};
Cla014894	0	0	0	-1.457	GO:0031225,anchored component of membrane; GO:0005886,plasma membrane; GO:0046872,metal ion binding; GO:0009734,auxin-activated signaling pathway; GO:0055114,oxidation-reduction process	--	At3g07390	ref|XP_022991983.1|	AIR12_ARATH,RecName: Full=Auxin-induced in root cultures protein 12; Flags: Precursor;	A0A1S4E1W3_CUCME,SubName: Full=auxin-induced in root cultures protein 12 {ECO:0000313|RefSeq:XP_016902216.1};
Cla014924	-1.141	0	0	0	GO:0033897,ribonuclease T2 activity; GO:0003723,RNA binding	K01166: E3.1.27.1; ribonuclease T2 [EC:3.1.27.1]	At1g14220	ref|XP_004149779.2|	RNMC_MOMCH,RecName: Full=Ribonuclease MC; Short=RNase MC; EC=3.1.27.1;	A0A0A0K4L1_CUCSA,SubName: Full=Uncharacterized protein {ECO:0000313|EMBL:KGN44625.1};
Cla014931	-1.499	0	0	-1.36	GO:0050736,O-malonyltransferase activity; GO:0009718,anthocyanin-containing compound biosynthetic process	K13264: IF7MAT; isoflavone 7-O-glucoside-6''-O-malonyltransferase [EC:2.3.1.115]	At3g29590	ref|XP_008458037.1|	5MAT_ARATH,RecName: Full=Malonyl-CoA:anthocyanidin 5-O-glucoside-6''-O-malonyltransferase; EC=2.3.1.-; AltName: Full=Anthocyanin 5-aromatic acyltransferase-like protein; Short=At5MAT;	A0A1S3C6W0_CUCME,SubName: Full=malonyl-CoA:anthocyanidin 5-O-glucoside-6''-O-malonyltransferase {ECO:0000313|RefSeq:XP_008458037.1};
Cla014954	3.019	0	0	0	GO:0030246,carbohydrate binding; GO:0030598,rRNA N-glycosylase activity; GO:0017148,negative regulation of translation	--	--	ref|XP_008458115.1|	SGSL_TRIAN,RecName: Full=Seed lectin {ECO:0000303|PubMed:23897472}; Short=SGSL {ECO:0000303|PubMed:23897472}; Contains: RecName: Full=Seed lectin Aalpha chain {ECO:0000303|PubMed:23897472}; Contains: RecName: Full=Seed lectin Abeta chain {ECO:0000303|PubMed:23897472}; Contains: RecName: Full=Seed lectin B chain {ECO:0000303|PubMed:23897472}; Flags: Fragments;	A0A1S3C7Q1_CUCME,RecName: Full=rRNA N-glycosidase {ECO:0000256|RuleBase:RU004915}; EC=3.2.2.22 {ECO:0000256|RuleBase:RU004915};
Cla014978	1.365	0	0	0	GO:0005811,lipid droplet	--	At1g05510	ref|XP_008462003.1|	OBP1A_MAIZE,RecName: Full=Oil body-associated protein 1A {ECO:0000303|PubMed:24406791};	A0A1S3CGF6_CUCME,SubName: Full=oil body-associated protein 1A-like {ECO:0000313|RefSeq:XP_008462003.1};
Cla015003	0	1.97	0	0	GO:0005730,nucleolus; GO:0003700,DNA binding transcription factor activity; GO:0000987,proximal promoter sequence-specific DNA binding; GO:0043565,sequence-specific DNA binding; GO:0044212,transcription regulatory region DNA binding; GO:0048527,lateral root development; GO:0006355,regulation of transcription, DNA-templated; GO:0010200,response to chitin; GO:0006351,transcription, DNA-templated	--	At2g46400	ref|XP_008461982.1|	WRK46_ARATH,RecName: Full=Probable WRKY transcription factor 46; AltName: Full=WRKY DNA-binding protein 46;	A0A1S3CGE2_CUCME,SubName: Full=probable WRKY transcription factor 53 {ECO:0000313|RefSeq:XP_008461982.1};
Cla015014	0	0	0	1.237	GO:0005794,Golgi apparatus; GO:0016021,integral component of membrane; GO:0016413,O-acetyltransferase activity; GO:0071554,cell wall organization or biogenesis	--	At4g01080	ref|XP_004139657.1|	TBL25_ARATH,RecName: Full=Protein trichome birefringence-like 25;	A0A0A0K876_CUCSA,SubName: Full=Uncharacterized protein {ECO:0000313|EMBL:KGN44527.1};
Cla015028	0	0	1.16	0	GO:0005737,cytoplasm; GO:0004022,alcohol dehydrogenase (NAD) activity; GO:0008270,zinc ion binding	K18857: ADH1; alcohol dehydrogenase class-P [EC:1.1.1.1]	At1g77120	ref|XP_011659133.1|	ADH1_TRIRP,RecName: Full=Alcohol dehydrogenase 1; EC=1.1.1.1 {ECO:0000250|UniProtKB:P06525};	A0A0A0K9P6_CUCSA,SubName: Full=Uncharacterized protein {ECO:0000313|EMBL:KGN44506.1};
Cla015033	0	0	1.023	0	GO:0005618,cell wall; GO:0005576,extracellular region; GO:0004185,serine-type carboxypeptidase activity; GO:0051603,proteolysis involved in cellular protein catabolic process	K16297: SCPL-II; serine carboxypeptidase-like clade II [EC:3.4.16.-]	At5g42240	ref|XP_008461495.1|	SCP42_ARATH,RecName: Full=Serine carboxypeptidase-like 42; EC=3.4.16.-; Flags: Precursor;	A0A1S3CER5_CUCME,RecName: Full=Carboxypeptidase {ECO:0000256|RuleBase:RU361156}; EC=3.4.16.- {ECO:0000256|RuleBase:RU361156};
Cla015082	-1.323	0	0	0	--	--	--	ref|XP_008451548.1|	--	A0A1S3BRP4_CUCME,SubName: Full=uncharacterized protein LOC103492795 {ECO:0000313|RefSeq:XP_008451548.1};
Cla015100	-1.225	0	0	0	--	--	--	gb|KGN44973.1|	--	A0A0A0K673_CUCSA,SubName: Full=Uncharacterized protein {ECO:0000313|EMBL:KGN44973.1};
Cla015101	-1.723	0	0	0	GO:0005576,extracellular region; GO:0008810,cellulase activity; GO:0071555,cell wall organization; GO:0030245,cellulose catabolic process	K01179: E3.2.1.4; endoglucanase [EC:3.2.1.4]	At4g02290	ref|XP_008451546.1|	GUN17_ARATH,RecName: Full=Endoglucanase 17; EC=3.2.1.4; AltName: Full=Endo-1,4-beta glucanase 17; Flags: Precursor;	A0A1S3BR45_CUCME,RecName: Full=Endoglucanase {ECO:0000256|RuleBase:RU361166}; EC=3.2.1.4 {ECO:0000256|RuleBase:RU361166};
Cla015102	-1.298	0	0	0	GO:0071944,cell periphery; GO:0005618,cell wall; GO:0005576,extracellular region; GO:0045330,aspartyl esterase activity; GO:0030599,pectinesterase activity; GO:0046910,pectinesterase inhibitor activity; GO:0042545,cell wall modification; GO:0045490,pectin catabolic process	K01051: E3.1.1.11; pectinesterase [EC:3.1.1.11]	At4g02320	ref|XP_008451545.2|	PME40_ARATH,RecName: Full=Probable pectinesterase/pectinesterase inhibitor 40; Includes: RecName: Full=Pectinesterase inhibitor 40; AltName: Full=Pectin methylesterase inhibitor 40; Includes: RecName: Full=Pectinesterase 40; Short=PE 40; EC=3.1.1.11; AltName: Full=Pectin methylesterase 40; Short=AtPME40; Flags: Precursor;	A0A1S3BSU3_CUCME,RecName: Full=Pectinesterase {ECO:0000256|RuleBase:RU000589}; EC=3.1.1.11 {ECO:0000256|RuleBase:RU000589};
Cla015118	-1.695	0	0	0	--	--	--	ref|XP_011659382.1|	--	A0A0A0K6B1_CUCSA,SubName: Full=Uncharacterized protein {ECO:0000313|EMBL:KGN44993.1};
Cla015120	-2.067	0	0	-1.615	GO:0022626,cytosolic ribosome; GO:0005634,nucleus; GO:0003700,DNA binding transcription factor activity; GO:0046872,metal ion binding; GO:0043565,sequence-specific DNA binding; GO:0044212,transcription regulatory region DNA binding; GO:0009738,abscisic acid-activated signaling pathway; GO:0009736,cytokinin-activated signaling pathway; GO:0009740,gibberellic acid mediated signaling pathway; GO:000…	--	At1g67030	ref|XP_008451655.1|	ZFP6_ARATH,RecName: Full=Zinc finger protein 6 {ECO:0000305};	A0A1S3BSU1_CUCME,SubName: Full=zinc finger protein 6-like {ECO:0000313|RefSeq:XP_008451655.1};
Cla015133	0	2.833	0	0	--	--	At3g03280	ref|XP_008451488.1|	--	A0A1S3BSD7_CUCME,SubName: Full=uncharacterized protein LOC103492762 {ECO:0000313|RefSeq:XP_008451488.1};
Cla015138	-1.047	0	0	0	GO:0005634,nucleus; GO:0003700,DNA binding transcription factor activity; GO:0045735,nutrient reservoir activity; GO:0046982,protein heterodimerization activity; GO:0043565,sequence-specific DNA binding; GO:0009267,cellular response to starvation; GO:0006971,hypotonic response; GO:2000693,positive regulation of seed maturation; GO:0045893,positive regulation of transcription, DNA-templated; GO:00…	--	At3g62420	ref|XP_008451653.1|	BZP53_ARATH,RecName: Full=bZIP transcription factor 53 {ECO:0000303|PubMed:11906833}; Short=AtbZIP53 {ECO:0000303|PubMed:11906833};	A0A1S3BS27_CUCME,SubName: Full=bZIP transcription factor 53-like {ECO:0000313|RefSeq:XP_008451653.1};
Cla015153	-3.417	0	0	0	GO:0005634,nucleus; GO:0003677,DNA binding; GO:0003700,DNA binding transcription factor activity; GO:0046983,protein dimerization activity; GO:0030154,cell differentiation; GO:2000280,regulation of root development; GO:0006355,regulation of transcription, DNA-templated; GO:0006351,transcription, DNA-templated	--	At2g47270	gb|KGN45028.1|	BH151_ARATH,RecName: Full=Transcription factor UPBEAT1; AltName: Full=Basic helix-loop-helix protein 151; Short=AtbHLH151; Short=bHLH 151; AltName: Full=Transcription factor EN 146; AltName: Full=Transcription factor bHLH151; AltName: Full=bHLH transcription factor bHLH151;	A0A0A0K6D9_CUCSA,SubName: Full=Uncharacterized protein {ECO:0000313|EMBL:KGN45028.1};
Cla015169	3.234	0	0	0	--	--	--	ref|XP_022991628.1|	--	A0A0A0K5V7_CUCSA,SubName: Full=Uncharacterized protein {ECO:0000313|EMBL:KGN45045.1};
Cla015187	0	0	0	-1.701	--	--	At4g01870	ref|XP_008461387.1|	--	A0A1S3CEJ8_CUCME,SubName: Full=uncharacterized protein LOC103499982 {ECO:0000313|RefSeq:XP_008461387.1};
Cla015199	0	0	0	-1.072	--	--	--	ref|XP_008461364.1|	--	A0A1S3CEJ2_CUCME,SubName: Full=uncharacterized protein LOC103499969 {ECO:0000313|RefSeq:XP_008461364.1, ECO:0000313|RefSeq:XP_008461365.1, ECO:0000313|RefSeq:XP_008461366.1};
Cla015284	0	0	0	-3.343	--	--	At2g31940	ref|XP_022954080.1|	--	V7BSW8_PHAVU,SubName: Full=Uncharacterized protein {ECO:0000313|EMBL:ESW21107.1};
Cla015292	0	0	0	-2.678	GO:0016020,membrane; GO:0008289,lipid binding; GO:0006869,lipid transport	--	At2g18370	ref|XP_008461223.1|	NLTP8_ARATH,RecName: Full=Non-specific lipid-transfer protein 8; Short=LTP 8; Flags: Precursor;	A0A1S3CEM4_CUCME,RecName: Full=Non-specific lipid-transfer protein {ECO:0000256|RuleBase:RU000628};
Cla015298	1.352	0	0	0	GO:0016207,4-coumarate-CoA ligase activity; GO:0005524,ATP binding; GO:0009698,phenylpropanoid metabolic process	K01904: 4CL; 4-coumarate--CoA ligase [EC:6.2.1.12]	At1g51680	ref|XP_004135894.2|	4CL2_TOBAC,RecName: Full=4-coumarate--CoA ligase 2; Short=4CL 2; EC=6.2.1.12; AltName: Full=4-coumaroyl-CoA synthase 2;	A0A0A0K8H9_CUCSA,SubName: Full=Uncharacterized protein {ECO:0000313|EMBL:KGN45189.1};
Cla015337	1.211	0	0	0	GO:0005739,mitochondrion; GO:0003992,N2-acetyl-L-ornithine:2-oxoglutarate 5-aminotransferase activity; GO:0030170,pyridoxal phosphate binding; GO:0006526,arginine biosynthetic process	K00818: E2.6.1.11, argD; acetylornithine aminotransferase [EC:2.6.1.11]	At1g80600	ref|XP_004135869.1|	ARGD_ALNGL,RecName: Full=Acetylornithine aminotransferase, mitochondrial; Short=ACOAT; EC=2.6.1.11; AltName: Full=Acetylornithine transaminase; Short=AOTA; Flags: Precursor;	A0A0A0K6U3_CUCSA,SubName: Full=Uncharacterized protein {ECO:0000313|EMBL:KGN45233.1};
Cla015349	1.338	0	0	0	GO:0007049,cell cycle; GO:0007275,multicellular organism development; GO:0009737,response to abscisic acid	K03255: TIF31, CLU1; protein TIF31	At4g28080	ref|XP_008461138.1|	TSS_ARATH,RecName: Full=Protein TSS {ECO:0000303|PubMed:21185286}; AltName: Full=TPR-domain suppressor of STIMPY {ECO:0000303|PubMed:21185286};	A0A1S3CE11_CUCME,SubName: Full=protein TSS {ECO:0000313|RefSeq:XP_008461138.1};
Cla015364	-2.574	0	0	0	--	--	--	ref|XP_008461119.1|	--	A0A1S3CDI6_CUCME,SubName: Full=uncharacterized protein LOC103499800 {ECO:0000313|RefSeq:XP_008461119.1};
Cla015403	0	0	0	-1.372	GO:0016021,integral component of membrane; GO:0005524,ATP binding; GO:0016887,ATPase activity	--	At1g15520	ref|XP_008461059.1|	PDR1_TOBAC,RecName: Full=Pleiotropic drug resistance protein 1; AltName: Full=NtPDR1;	A0A1S3CEB1_CUCME,SubName: Full=pleiotropic drug resistance protein 1-like {ECO:0000313|RefSeq:XP_008461059.1};
Cla015414	1.604	0	0	0	GO:0005634,nucleus; GO:0009734,auxin-activated signaling pathway; GO:0006355,regulation of transcription, DNA-templated; GO:0006351,transcription, DNA-templated	K14484: IAA; auxin-responsive protein IAA	At3g15540	ref|XP_022954061.1|	AUX22_SOYBN,RecName: Full=Auxin-induced protein AUX22;	A0A0A0KC02_CUCSA,RecName: Full=Auxin-responsive protein {ECO:0000256|RuleBase:RU004549};
Cla015428	0	0	0	-1.703	GO:0005887,integral component of plasma membrane; GO:0009506,plasmodesma; GO:0008271,secondary active sulfate transmembrane transporter activity; GO:0015116,sulfate transmembrane transporter activity; GO:0015293,symporter activity	K17471: SULTR3; sulfate transporter 3	At3g15990	ref|XP_008462141.1|	SUT34_ARATH,RecName: Full=Probable sulfate transporter 3.4;	A0A1S3CG78_CUCME,SubName: Full=probable sulfate transporter 3.4 {ECO:0000313|RefSeq:XP_008462141.1};
Cla015436	0	0	0	1.484	--	K19476: IST1; vacuolar protein sorting-associated protein IST1	At1g79910	ref|XP_008462153.1|	--	A0A1S3CGT5_CUCME,SubName: Full=uncharacterized protein LOC103500577 {ECO:0000313|RefSeq:XP_008462153.1};
Cla015439	-1.041	0	0	0	GO:0016021,integral component of membrane; GO:0005743,mitochondrial inner membrane; GO:0005739,mitochondrion; GO:0015181,arginine transmembrane transporter activity; GO:0005290,L-histidine transmembrane transporter activity; GO:0015189,L-lysine transmembrane transporter activity; GO:0000064,L-ornithine transmembrane transporter activity; GO:0006844,acyl carnitine transport; GO:0006972,hyperosmoti…	K15109: SLC25A20_29, CACT, CACL, CRC1; solute carrier family 25 (mitochondrial carnitine/acylcarnitine transporter), member 20/29	At1g79900	ref|XP_008462156.1|	BAC2_ARATH,RecName: Full=Mitochondrial arginine transporter BAC2; AltName: Full=Mitochondrial basic amino acid carrier 2; Short=AtMBAC2;	A0A1S3CGB7_CUCME,SubName: Full=mitochondrial arginine transporter BAC2-like isoform X1 {ECO:0000313|RefSeq:XP_008462156.1};
Cla015467	1.635	0	0	0	GO:0005634,nucleus; GO:0003700,DNA binding transcription factor activity; GO:0043565,sequence-specific DNA binding; GO:0009873,ethylene-activated signaling pathway; GO:0045893,positive regulation of transcription, DNA-templated; GO:0006351,transcription, DNA-templated	K09286: EREBP; EREBP-like factor	At5g11590	ref|XP_008462184.1|	DREB3_ARATH,RecName: Full=Dehydration-responsive element-binding protein 3; AltName: Full=Protein TINY 2;	A0A1S3CGW5_CUCME,SubName: Full=dehydration-responsive element-binding protein 3-like {ECO:0000313|RefSeq:XP_008462184.1};
Cla015493	-1.011	0	0	0	GO:0005887,integral component of plasma membrane; GO:0043231,intracellular membrane-bounded organelle; GO:0005886,plasma membrane; GO:0005524,ATP binding; GO:0005388,calcium-transporting ATPase activity; GO:0005516,calmodulin binding; GO:0046872,metal ion binding; GO:0009555,pollen development; GO:0007338,single fertilization	K01537: E3.6.3.8; Ca2+-transporting ATPase [EC:3.6.3.8]	At3g21180	ref|XP_004141743.2|	ACA9_ARATH,RecName: Full=Calcium-transporting ATPase 9, plasma membrane-type; EC=3.6.3.8; AltName: Full=Ca(2+)-ATPase isoform 9;	A0A0A0K7J1_CUCSA,RecName: Full=Calcium-transporting ATPase {ECO:0000256|RuleBase:RU361146}; EC=3.6.3.8 {ECO:0000256|RuleBase:RU361146};
Cla015574	0	0	0	-1.241	GO:0048046,apoplast; GO:0005618,cell wall; GO:0005886,plasma membrane; GO:0004564,beta-fructofuranosidase activity; GO:0004575,sucrose alpha-glucosidase activity; GO:0005975,carbohydrate metabolic process; GO:0050832,defense response to fungus; GO:0080167,response to karrikin; GO:0009611,response to wounding	K01193: INV, sacA; beta-fructofuranosidase [EC:3.2.1.26]	At3g13790	ref|XP_022954011.1|	INV1_ARATH,RecName: Full=Beta-fructofuranosidase, insoluble isoenzyme CWINV1; EC=3.2.1.26; AltName: Full=Cell wall beta-fructosidase 1; Short=AtbetaFRUCT1; AltName: Full=Cell wall invertase 1; Short=AtcwINV1; AltName: Full=Sucrose hydrolase 1; Flags: Precursor;	A0A0A0K761_CUCSA,SubName: Full=Uncharacterized protein {ECO:0000313|EMBL:KGN45520.1};
Cla015580	0	1.698	0	0	--	K04077: groEL, HSPD1; chaperonin GroEL	At1g17620	ref|XP_008462352.1|	--	A0A1S3CHA5_CUCME,SubName: Full=NDR1/HIN1-Like protein 3 {ECO:0000313|RefSeq:XP_008462352.1};
Cla015595	0	0	-2.558	-6.604	GO:0004427,inorganic diphosphatase activity; GO:0046872,metal ion binding; GO:0052731,phosphocholine phosphatase activity; GO:0052732,phosphoethanolamine phosphatase activity; GO:0051262,protein tetramerization	K13248: PHOSPHO2; pyridoxal phosphate phosphatase PHOSPHO2 [EC:3.1.3.74]	At1g17710	ref|XP_004141676.1|	PPSP2_ARATH,RecName: Full=Inorganic pyrophosphatase 2; Short=AtPPsPase2; Short=PPi phosphatase 2; Short=Pyrophosphate-specific phosphatase 2; EC=3.6.1.1;	A0A0A0KB00_CUCSA,SubName: Full=Uncharacterized protein {ECO:0000313|EMBL:KGN45537.1};
Cla015648	-2.136	0	0	0	--	--	At2g44310	ref|XP_008455501.1|	--	A0A1S3C175_CUCME,SubName: Full=uncharacterized protein LOC103495653 {ECO:0000313|RefSeq:XP_008455501.1};
Cla015652	0	0	-1.102	-1.829	--	--	--	ref|XP_004144531.1|	--	A0A0A0K5A1_CUCSA,SubName: Full=Uncharacterized protein {ECO:0000313|EMBL:KGN43452.1};
Cla015653	0	0	0	-2.157	--	--	--	ref|XP_004144531.1|	--	A0A0A0K5A1_CUCSA,SubName: Full=Uncharacterized protein {ECO:0000313|EMBL:KGN43452.1};
Cla015655	0	-1.042	0	0	GO:0031225,anchored component of membrane; GO:0046658,anchored component of plasma membrane; GO:0016020,membrane; GO:0005886,plasma membrane	--	At2g04780	ref|XP_022135635.1|	FLA7_ARATH,RecName: Full=Fasciclin-like arabinogalactan protein 7; Flags: Precursor;	A0A0A0K597_CUCSA,SubName: Full=Uncharacterized protein {ECO:0000313|EMBL:KGN43447.1};
Cla015658	-1.162	0	0	0	--	--	--	ref|XP_022969305.1|	--	A0A1S3C134_CUCME,SubName: Full=uncharacterized protein LOC103495667 {ECO:0000313|RefSeq:XP_008455515.1};
Cla015682	0	0	0	-1.856	GO:0005887,integral component of plasma membrane; GO:0043231,intracellular membrane-bounded organelle; GO:0005524,ATP binding; GO:0005388,calcium-transporting ATPase activity; GO:0005516,calmodulin binding; GO:0046872,metal ion binding	K01537: E3.6.3.8; Ca2+-transporting ATPase [EC:3.6.3.8]	At3g63380	ref|XP_022136264.1|	ACA12_ARATH,RecName: Full=Calcium-transporting ATPase 12, plasma membrane-type; EC=3.6.3.8; AltName: Full=Ca(2+)-ATPase isoform 12;	A0A1S3CG68_CUCME,SubName: Full=calcium-transporting ATPase 12, plasma membrane-type-like {ECO:0000313|RefSeq:XP_008462128.1};
Cla015694	0	0	1.153	0	GO:0031225,anchored component of membrane; GO:0046658,anchored component of plasma membrane; GO:0016020,membrane; GO:0005886,plasma membrane; GO:0005774,vacuolar membrane	--	At4g12730	ref|XP_008462050.1|	FLA2_ARATH,RecName: Full=Fasciclin-like arabinogalactan protein 2; Flags: Precursor;	A0A1S3CG05_CUCME,SubName: Full=fasciclin-like arabinogalactan protein 2 {ECO:0000313|RefSeq:XP_008462050.1};
Cla015714	1.125	0	0	0	GO:0005794,Golgi apparatus; GO:0016020,membrane; GO:0005634,nucleus; GO:0005886,plasma membrane; GO:0005524,ATP binding; GO:0009882,blue light photoreceptor activity; GO:0010181,FMN binding; GO:0042802,identical protein binding; GO:0016301,kinase activity; GO:0000155,phosphorelay sensor kinase activity; GO:0004674,protein serine/threonine kinase activity; GO:0009902,chloroplast relocation; GO:000…	K20715: PHOT; phototropin [EC:2.7.11.1]	At5g58140	ref|XP_008462011.1|	PHOT2_ARATH,RecName: Full=Phototropin-2; EC=2.7.11.1; AltName: Full=Defective in chloroplast avoidance protein 1; AltName: Full=Non-phototropic hypocotyl 1-like protein 1; Short=AtKin7; Short=NPH1-like protein 1;	A0A1S3CHE3_CUCME,SubName: Full=phototropin-2-like isoform X1 {ECO:0000313|RefSeq:XP_008462011.1};
Cla015723	2.486	0	0	0	GO:0005789,endoplasmic reticulum membrane; GO:0016021,integral component of membrane; GO:0031966,mitochondrial membrane; GO:0042170,plastid membrane; GO:0004420,hydroxymethylglutaryl-CoA reductase (NADPH) activity; GO:0050661,NADP binding; GO:0015936,coenzyme A metabolic process; GO:0008299,isoprenoid biosynthetic process	K00021: HMGCR; hydroxymethylglutaryl-CoA reductase (NADPH) [EC:1.1.1.34]	At1g76490	ref|XP_008451185.1|	HMDH1_GOSHI,RecName: Full=3-hydroxy-3-methylglutaryl-coenzyme A reductase 1; Short=HMG-CoA reductase 1; EC=1.1.1.34;	A0A1S3BRZ3_CUCME,RecName: Full=3-hydroxy-3-methylglutaryl coenzyme A reductase {ECO:0000256|RuleBase:RU361219}; Short=HMG-CoA reductase {ECO:0000256|RuleBase:RU361219}; EC=1.1.1.34 {ECO:0000256|RuleBase:RU361219};
Cla015739	0	0	0	-1.057	GO:0016021,integral component of membrane; GO:0005622,intracellular; GO:0005886,plasma membrane; GO:0005262,calcium channel activity; GO:0008066,glutamate receptor activity; GO:0004970,ionotropic glutamate receptor activity; GO:0006816,calcium ion transport; GO:0019722,calcium-mediated signaling; GO:0071230,cellular response to amino acid stimulus	K05387: GRIP; glutamate receptor, ionotropic, plant	At2g17260	ref|XP_008447826.1|	GLR32_ARATH,RecName: Full=Glutamate receptor 3.2; Short=AtGluR2; AltName: Full=Ligand-gated ion channel 3.2; Flags: Precursor;	A0A1S3BIB4_CUCME,RecName: Full=Glutamate receptor {ECO:0000256|PIRNR:PIRNR037090};
Cla015774	-1.096	0	0	0	GO:0005618,cell wall; GO:0005576,extracellular region; GO:0005794,Golgi apparatus; GO:0016021,integral component of membrane; GO:0009505,plant-type cell wall; GO:0009506,plasmodesma	--	At3g45970	ref|XP_004153444.1|	EXLA1_ARATH,RecName: Full=Expansin-like A1; Short=At-EXPL1; Short=AtEXLA1; Short=AtEXPL1; AltName: Full=Ath-ExpBeta-2.1; Flags: Precursor;	A0A1S4DWU6_CUCME,SubName: Full=expansin-like A2 {ECO:0000313|RefSeq:XP_016900448.1};
Cla015823	-1.478	0	0	0	GO:0005777,peroxisome; GO:0008465,glycerate dehydrogenase activity; GO:0051287,NAD binding; GO:0009854,oxidative photosynthetic carbon pathway	K15893: HPR1; hydroxypyruvate reductase 1	At1g68010	ref|XP_008447953.1|	DHGY_CUCSA,RecName: Full=Glycerate dehydrogenase; Short=GDH; EC=1.1.1.29; AltName: Full=NADH-dependent hydroxypyruvate reductase; Short=HPR;	A0A1S3BJ84_CUCME,SubName: Full=glycerate dehydrogenase isoform X2 {ECO:0000313|RefSeq:XP_008447953.1};
Cla015834	0	0	-1.553	-1.448	GO:0005634,nucleus; GO:0003677,DNA binding; GO:0006355,regulation of transcription, DNA-templated; GO:0006351,transcription, DNA-templated	K09422: MYBP; transcription factor MYB, plant	At4g38620	ref|XP_004144840.1|	MYB08_ANTMA,RecName: Full=Myb-related protein 308;	A0A1S3BJJ8_CUCME,SubName: Full=myb-related protein 308-like {ECO:0000313|RefSeq:XP_008447966.1};
Cla015854	1.477	0	0	0	--	K17338: REEP1_2_3_4; receptor expression-enhancing protein 1/2/3/4	At4g38810	ref|XP_008447993.1|	--	A0A1S3BIQ3_CUCME,SubName: Full=uncharacterized protein LOC103490312 isoform X1 {ECO:0000313|RefSeq:XP_008447993.1};
Cla015857	-1.675	0	0	0	GO:0009733,response to auxin	K14488: SAUR; SAUR family protein	At4g34770	ref|XP_011658585.1|	ARG7_VIGRR,RecName: Full=Indole-3-acetic acid-induced protein ARG7;	A0A0A0K174_CUCSA,SubName: Full=Uncharacterized protein {ECO:0000313|EMBL:KGN43218.1};
Cla015901	1.477	0	0	0	GO:0005615,extracellular space; GO:0005764,lysosome; GO:0000323,lytic vacuole; GO:0005634,nucleus; GO:0005773,vacuole; GO:0004197,cysteine-type endopeptidase activity; GO:0042742,defense response to bacterium; GO:0051603,proteolysis involved in cellular protein catabolic process; GO:0006970,response to osmotic stress; GO:0009651,response to salt stress	K01373: CTSF; cathepsin F [EC:3.4.22.41]	At4g39090	ref|XP_008448073.1|	RD19A_ARATH,RecName: Full=Cysteine protease RD19A {ECO:0000305}; EC=3.4.22.- {ECO:0000305}; AltName: Full=Protein RESPONSIVE TO DEHYDRATION 19 {ECO:0000303|PubMed:8325504}; Short=RD19 {ECO:0000303|PubMed:8325504}; Flags: Precursor;	A0A1S3BIU9_CUCME,SubName: Full=cysteine proteinase RD19a-like {ECO:0000313|RefSeq:XP_008448073.1};
Cla015906	0	0	0	-1.046	--	--	--	ref|XP_022135876.1|	--	--
Cla015919	0	-1.143	0	0	GO:0005634,nucleus; GO:0003677,DNA binding; GO:0048262,determination of dorsal/ventral asymmetry; GO:0009908,flower development; GO:0006355,regulation of transcription, DNA-templated; GO:0006351,transcription, DNA-templated	K15397: KCS; 3-ketoacyl-CoA synthase [EC:2.3.1.199]	At4g39250	ref|XP_004151116.1|	RAD_ANTMA,RecName: Full=Transcription factor RADIALIS;	A0A0A0K344_CUCSA,SubName: Full=Uncharacterized protein {ECO:0000313|EMBL:KGN44075.1};
Cla015937	0	0	2.197	4.588	--	--	--	ref|XP_004151481.2|	--	A0A0A0K5Y0_CUCSA,SubName: Full=Uncharacterized protein {ECO:0000313|EMBL:KGN44339.1};
Cla015954	-1.409	0	0	0	GO:0008233,peptidase activity	K22763: DESI2, PPPDE1; deubiquitinase DESI2 [EC:3.4.19.12]	At1g47740	ref|XP_004148301.1|	PPDEX_ARATH,RecName: Full=DeSI-like protein At4g17486; EC=3.4.-.-;	A0A0A0K5V2_CUCSA,SubName: Full=Uncharacterized protein {ECO:0000313|EMBL:KGN44319.1};
Cla015970	1.47	0	0	1.306	GO:0046423,allene-oxide cyclase activity; GO:0020037,heme binding; GO:0047987,hydroperoxide dehydratase activity; GO:0005506,iron ion binding; GO:0004497,monooxygenase activity; GO:0016705,oxidoreductase activity, acting on paired donors, with incorporation or reduction of molecular oxygen; GO:0006952,defense response; GO:0031408,oxylipin biosynthetic process; GO:0016125,sterol metabolic process	K01723: AOS; hydroperoxide dehydratase [EC:4.2.1.92]	At5g42650	ref|XP_008454885.1|	AOS3_SOLLC,RecName: Full=Allene oxide synthase 3 {ECO:0000303|PubMed:12351632}; Short=LeAOS3 {ECO:0000303|PubMed:12351632}; EC=4.2.1.92 {ECO:0000269|PubMed:12351632}; AltName: Full=Allene oxide cyclase {ECO:0000303|PubMed:12351632}; EC=5.3.99.6 {ECO:0000269|PubMed:12351632}; AltName: Full=Cytochrome P450 CYP74C3 {ECO:0000303|PubMed:12351632}; AltName: Full=Cytochrome P450 CYP74D1 {ECO:0000303|Pub…	A0A1S3BZK9_CUCME,SubName: Full=allene oxide synthase 2-like isoform X1 {ECO:0000313|RefSeq:XP_008454885.1};
Cla015976	0	1.372	-1.528	0	--	--	At1g49470	ref|XP_016901698.1|	--	A0A1S4E0E2_CUCME,SubName: Full=transmembrane protein 45A {ECO:0000313|RefSeq:XP_016901698.1};
Cla015982	3.269	0	0	0	GO:0016298,lipase activity; GO:0080031,methyl salicylate esterase activity; GO:0009862,systemic acquired resistance, salicylic acid mediated signaling pathway	--	At2g23600	ref|XP_023530119.1|	SABP2_TOBAC,RecName: Full=Salicylic acid-binding protein 2; Short=NtSABP2; EC=3.1.1.-; AltName: Full=Methyl salicylate esterase;	A0A1S3C0U9_CUCME,SubName: Full=methylesterase 2-like {ECO:0000313|RefSeq:XP_008454899.1};
Cla016012	0	0	0	-1.442	GO:0042409,caffeoyl-CoA O-methyltransferase activity; GO:0046872,metal ion binding; GO:0009809,lignin biosynthetic process	K00588: E2.1.1.104; caffeoyl-CoA O-methyltransferase [EC:2.1.1.104]	At4g34050	gb|KGN43930.1|	CAMT1_POPTR,RecName: Full=Caffeoyl-CoA O-methyltransferase 1; EC=2.1.1.104; AltName: Full=Trans-caffeoyl-CoA 3-O-methyltransferase 1; Short=CCoAMT-1; Short=CCoAOMT-1;	A0A0A0K2N1_CUCSA,SubName: Full=Caffeoyl-CoA O-methyltransferase {ECO:0000313|EMBL:KGN43930.1};
Cla016027	0	0	0	-3.757	GO:0042802,identical protein binding; GO:0050275,scopoletin glucosyltransferase activity; GO:0008152,metabolic process	--	At2g15480	ref|XP_011658896.1|	SCGT_TOBAC,RecName: Full=Scopoletin glucosyltransferase; EC=2.4.1.128; AltName: Full=Phenylpropanoid:glucosyltransferase 1;	A0A0A0K2L5_CUCSA,RecName: Full=Glycosyltransferase {ECO:0000256|RuleBase:RU362057}; EC=2.4.1.- {ECO:0000256|RuleBase:RU362057};
Cla016029	0	0	0	-1.998	GO:0042802,identical protein binding; GO:0050275,scopoletin glucosyltransferase activity; GO:0008152,metabolic process	--	At2g15480	ref|XP_011658895.1|	SCGT_TOBAC,RecName: Full=Scopoletin glucosyltransferase; EC=2.4.1.128; AltName: Full=Phenylpropanoid:glucosyltransferase 1;	A0A1S4E0C3_CUCME,RecName: Full=Glycosyltransferase {ECO:0000256|RuleBase:RU362057}; EC=2.4.1.- {ECO:0000256|RuleBase:RU362057};
Cla016053	0	0	0	-1.119	GO:0047913,gallate 1-beta-glucosyltransferase activity; GO:0008152,metabolic process	K08236: E2.4.1.210; limonoid glucosyltransferase [EC:2.4.1.210]	At4g15480	ref|XP_008454995.1|	GGT_QUERO,RecName: Full=Gallate 1-beta-glucosyltransferase {ECO:0000303|PubMed:24412325}; EC=2.4.1.136 {ECO:0000269|PubMed:24412325}; AltName: Full=UDP-glucose:gallate glucosyltransferase {ECO:0000303|PubMed:24412325}; AltName: Full=Vanillate 1-beta-glucosyltransferase {ECO:0000305};	A0A1S3C127_CUCME,RecName: Full=Glycosyltransferase {ECO:0000256|RuleBase:RU362057}; EC=2.4.1.- {ECO:0000256|RuleBase:RU362057};
Cla016088	0	0	0	-1.544	GO:0005634,nucleus; GO:0003700,DNA binding transcription factor activity; GO:0046872,metal ion binding; GO:0043565,sequence-specific DNA binding; GO:0035264,multicellular organism growth; GO:0045892,negative regulation of transcription, DNA-templated; GO:0010117,photoprotection; GO:0015979,photosynthesis; GO:0009737,response to abscisic acid; GO:0010200,response to chitin; GO:0009409,response to …	--	At1g27730	ref|XP_004137088.1|	ZAT10_ARATH,RecName: Full=Zinc finger protein ZAT10; AltName: Full=Salt-tolerance zinc finger;	A0A0A0K2F6_CUCSA,SubName: Full=Uncharacterized protein {ECO:0000313|EMBL:KGN43855.1};
Cla016114	1.371	0	0	0	GO:0005634,nucleus; GO:0005524,ATP binding; GO:0003677,DNA binding; GO:0004386,helicase activity	K10875: RAD54L, RAD54; DNA repair and recombination protein RAD54 and RAD54-like protein [EC:3.6.4.-]	At1g05480	ref|XP_008465909.1|	CLSY3_ARATH,RecName: Full=SNF2 domain-containing protein CLASSY 3; EC=3.6.4.-; AltName: Full=Protein CHROMATIN REMODELING 31 {ECO:0000303|PubMed:16547115}; Short=AtCHR31;	A0A1S3CRE5_CUCME,SubName: Full=SNF2 domain-containing protein CLASSY 4-like {ECO:0000313|RefSeq:XP_008465909.1};
Cla016139	-1.059	0	0	0	GO:0005576,extracellular region	--	At4g17030	ref|XP_004148502.1|	EXLB1_ORYSJ,RecName: Full=Expansin-like B1; AltName: Full=Expansin-related 1; AltName: Full=OsEXLB1; AltName: Full=OsEXPR1; AltName: Full=OsaEXPb3.1; Flags: Precursor;	A0A0A0LEH3_CUCSA,SubName: Full=Major pollen allergen Ory s 1 {ECO:0000313|EMBL:KGN60430.1};
Cla016146	0	0	0	-1.06	--	--	--	--	--	--
Cla016169	0	1.857	0	0	GO:0005634,nucleus; GO:0003700,DNA binding transcription factor activity; GO:0043565,sequence-specific DNA binding; GO:0008283,cell proliferation; GO:0071365,cellular response to auxin stimulus; GO:0006351,transcription, DNA-templated	--	At4g17980	ref|XP_008465949.1|	NAC71_ARATH,RecName: Full=NAC domain-containing protein 71 {ECO:0000303|PubMed:15029955}; Short=ANAC071 {ECO:0000303|PubMed:15029955};	A0A1S3CQ36_CUCME,SubName: Full=NAC domain-containing protein 45-like isoform X1 {ECO:0000313|RefSeq:XP_008465949.1};
Cla016179	-1.578	0	0	0	GO:0008777,acetylornithine deacetylase activity; GO:0046872,metal ion binding; GO:0006526,arginine biosynthetic process	K01438: argE; acetylornithine deacetylase [EC:3.5.1.16]	At4g17830	dbj|BAA95409.1|	ARGE_ARATH,RecName: Full=Acetylornithine deacetylase; EC=3.5.1.16; AltName: Full=N-acetylornithinase; Short=AO; Short=Acetylornithinase; Short=NAO;	Q9MB49_CITLA,SubName: Full=DIP-1 {ECO:0000313|EMBL:BAA95409.1};
Cla016194	5.158	0	0	0	--	--	--	ref|XP_008465972.1|	--	A0A1S3CRK1_CUCME,SubName: Full=uncharacterized protein LOC103503541 {ECO:0000313|RefSeq:XP_008465972.1};
Cla016204	0	0	-1.008	0	--	--	--	--	--	--
Cla016279	1.357	0	0	0	GO:0005576,extracellular region; GO:0008810,cellulase activity; GO:0071555,cell wall organization; GO:0030245,cellulose catabolic process	K01179: E3.2.1.4; endoglucanase [EC:3.2.1.4]	At2g32990	ref|XP_016900707.1|	GUN11_ARATH,RecName: Full=Endoglucanase 11; EC=3.2.1.4; AltName: Full=Endo-1,4-beta glucanase 11; Flags: Precursor;	A0A1S4DXK4_CUCME,RecName: Full=Endoglucanase {ECO:0000256|RuleBase:RU361166}; EC=3.2.1.4 {ECO:0000256|RuleBase:RU361166};
Cla016287	0	0	0	-1.049	GO:0009815,1-aminocyclopropane-1-carboxylate oxidase activity; GO:0031418,L-ascorbic acid binding; GO:0046872,metal ion binding; GO:0009693,ethylene biosynthetic process; GO:0009835,fruit ripening	K05933: E1.14.17.4; aminocyclopropanecarboxylate oxidase [EC:1.14.17.4]	At1g05010	gb|AIS71925.1|	ACCO1_CUCME,RecName: Full=1-aminocyclopropane-1-carboxylate oxidase 1; Short=ACC oxidase 1; EC=1.14.17.4; AltName: Full=Ethylene-forming enzyme; Short=EFE; AltName: Full=PMEL1;	A0A097BU17_CITLA,SubName: Full=1-aminocyclopropane-1-carboxylate oxidase 1 {ECO:0000313|EMBL:AIS71925.1};
Cla016314	0	-1.314	0	-2.332	GO:0005737,cytoplasm; GO:0005634,nucleus; GO:0005524,ATP binding; GO:0004709,MAP kinase kinase kinase activity; GO:0004674,protein serine/threonine kinase activity; GO:0004702,signal transducer, downstream of receptor, with serine/threonine kinase activity; GO:0009738,abscisic acid-activated signaling pathway; GO:0032147,activation of protein kinase activity; GO:0007346,regulation of mitotic cell…	--	At4g26890	ref|XP_008448094.1|	M3K17_ARATH,RecName: Full=Mitogen-activated protein kinase kinase kinase 17 {ECO:0000303|PubMed:25720833}; EC=2.7.11.25 {ECO:0000250|UniProtKB:Q9ZVP5, ECO:0000255|PROSITE-ProRule:PRU00159};	A0A1S3BIX8_CUCME,SubName: Full=mitogen-activated protein kinase kinase kinase 2 {ECO:0000313|RefSeq:XP_008448094.1};
Cla016321	1.182	0	0	0	GO:0009507,chloroplast; GO:0009535,chloroplast thylakoid membrane; GO:0042651,thylakoid membrane; GO:0046872,metal ion binding; GO:0004659,prenyltransferase activity; GO:0043693,monoterpene biosynthetic process	K13789: GGPS; geranylgeranyl diphosphate synthase, type II [EC:2.5.1.1 2.5.1.10 2.5.1.29]	At4g38460	ref|XP_023536167.1|	GGR_ARATH,RecName: Full=Heterodimeric geranylgeranyl pyrophosphate synthase small subunit, chloroplastic; Flags: Precursor;	A0A0A0K8P9_CUCSA,SubName: Full=Uncharacterized protein {ECO:0000313|EMBL:KGN44166.1};
Cla016325	-1.155	0	0	0	GO:0003743,translation initiation factor activity; GO:0006417,regulation of translation	K03113: EIF1, SUI1; translation initiation factor 1	At5g54940	ref|XP_004139787.1|	SUI11_ARATH,RecName: Full=Protein translation factor SUI1 homolog 1;	A0A1S3BI45_CUCME,SubName: Full=protein translation factor SUI1 homolog 1-like {ECO:0000313|RefSeq:XP_008447738.1};
Cla016383	0	0	0	2.301	GO:0005576,extracellular region; GO:0004252,serine-type endopeptidase activity	--	At1g71950	gb|ADN34190.1|	SBT34_ARATH,RecName: Full=Subtilisin-like protease SBT3.4 {ECO:0000303|PubMed:16193095}; EC=3.4.21.- {ECO:0000255|PROSITE-ProRule:PRU10082}; AltName: Full=Subtilase subfamily 3 member 4 {ECO:0000303|PubMed:16193095}; Short=AtSBT3.4 {ECO:0000303|PubMed:16193095}; Flags: Precursor;	E5GCJ1_CUCME,SubName: Full=Peptidase {ECO:0000313|EMBL:ADN34190.1};
Cla016406	-1.456	0	0	0	GO:0016021,integral component of membrane; GO:0005886,plasma membrane; GO:0005524,ATP binding; GO:0042626,ATPase activity, coupled to transmembrane movement of substances; GO:0080168,abscisic acid transport; GO:0009737,response to abscisic acid	--	At1g71960	ref|XP_016902792.1|	AB25G_ARATH,RecName: Full=ABC transporter G family member 25; Short=ABC transporter ABCG.25; Short=AtABCG25; AltName: Full=White-brown complex homolog protein 26; Short=AtWBC26;	A0A1S4E3I9_CUCME,SubName: Full=ABC transporter G family member 25 isoform X2 {ECO:0000313|RefSeq:XP_016902792.1};
Cla016416	0	0	1.347	0	GO:0016021,integral component of membrane; GO:0005345,purine nucleobase transmembrane transporter activity; GO:0005215,transporter activity; GO:0015853,adenine transport; GO:0015854,guanine transport; GO:0006863,purine nucleobase transport	K06901: pbuG; putative MFS transporter, AGZA family, xanthine/uracil permease	At3g10960	ref|XP_004138552.1|	AZG1_ARATH,RecName: Full=Adenine/guanine permease AZG1; AltName: Full=AzgA-homolog protein; AltName: Full=Protein AZAGUANINE RESISTANT 1; Short=AtAzg1;	A0A0A0K8Q2_CUCSA,SubName: Full=Uncharacterized protein {ECO:0000313|EMBL:KGN45828.1};
Cla016418	0	2.709	0	0	--	--	--	--	--	--
Cla016423	-1.703	0	0	0	--	--	At3g56360	ref|XP_022993514.1|	--	A0A1S3C411_CUCME,SubName: Full=uncharacterized protein LOC103496620 {ECO:0000313|RefSeq:XP_008456777.1};
Cla016474	1.117	0	0	0	GO:0005739,mitochondrion; GO:0071949,FAD binding; GO:0004657,proline dehydrogenase activity; GO:0006562,proline catabolic process; GO:0010133,proline catabolic process to glutamate; GO:0006970,response to osmotic stress; GO:0009414,response to water deprivation	K00318: PRODH; proline dehydrogenase [EC:1.5.-.-]	At5g38710	ref|XP_008459446.1|	PROD2_ARATH,RecName: Full=Proline dehydrogenase 2, mitochondrial; EC=1.5.5.2; AltName: Full=Osmotic stress-induced proline dehydrogenase; AltName: Full=Proline oxidase; Flags: Precursor;	A0A1S3CBE9_CUCME,RecName: Full=Proline dehydrogenase {ECO:0000256|RuleBase:RU364054}; EC=1.5.5.2 {ECO:0000256|RuleBase:RU364054};
Cla016491	-1.242	0	1.6	0	GO:0005634,nucleus; GO:0003677,DNA binding; GO:0003700,DNA binding transcription factor activity; GO:0006351,transcription, DNA-templated	--	At3g30530	gb|ADN34279.1|	BZP43_ARATH,RecName: Full=Basic leucine zipper 43 {ECO:0000303|PubMed:11906833}; Short=AtbZIP43 {ECO:0000303|PubMed:11906833}; Short=bZIP protein 43 {ECO:0000303|PubMed:11906833};	E5GCT0_CUCME,SubName: Full=BZIP transcription factor {ECO:0000313|EMBL:ADN34279.1};
Cla016511	-1.422	0	0	0	--	--	--	gb|KGN52517.1|	--	A0A0A0KVT8_CUCSA,SubName: Full=Uncharacterized protein {ECO:0000313|EMBL:KGN52517.1};
Cla016524	3.329	0	0	0	GO:0043231,intracellular membrane-bounded organelle; GO:0080043,quercetin 3-O-glucosyltransferase activity; GO:0080044,quercetin 7-O-glucosyltransferase activity; GO:0008152,metabolic process	K04628: CGT, UGT8; ceramide galactosyltransferase [EC:2.4.1.47]	At3g02100	ref|XP_023549730.1|	U83A1_ARATH,RecName: Full=UDP-glycosyltransferase 83A1; EC=2.4.1.-;	A0A067K4T2_JATCU,SubName: Full=Uncharacterized protein {ECO:0000313|EMBL:KDP27235.1};
Cla016537	-2.282	0	0	0	--	K07735: algH; putative transcriptional regulator	At3g29240	ref|XP_004141581.1|	--	A0A0A0KSE6_CUCSA,SubName: Full=Uncharacterized protein {ECO:0000313|EMBL:KGN52495.1};
Cla016547	0	0	0	-1.995	GO:0048471,perinuclear region of cytoplasm; GO:0005886,plasma membrane; GO:0009506,plasmodesma; GO:0004430,1-phosphatidylinositol 4-kinase activity; GO:0051015,actin filament binding; GO:0070300,phosphatidic acid binding; GO:0005546,phosphatidylinositol-4,5-bisphosphate binding; GO:0070273,phosphatidylinositol-4-phosphate binding; GO:0030036,actin cytoskeleton organization; GO:0048015,phosphatidy…	K00888: PI4KA; phosphatidylinositol 4-kinase A [EC:2.7.1.67]	At1g49340	ref|XP_008457937.1|	P4KA1_ARATH,RecName: Full=Phosphatidylinositol 4-kinase alpha 1; Short=PI4-kinase alpha 1; Short=PtdIns-4-kinase alpha 1; EC=2.7.1.67; AltName: Full=Phosphatidylinositol 4-OH kinase alpha1; Short=AtPI4Kalpha1; Short=PI-4Kalpha1;	A0A1S3C6N5_CUCME,SubName: Full=phosphatidylinositol 4-kinase alpha 1 {ECO:0000313|RefSeq:XP_008457937.1};
Cla016551	-3.429	0	0	0	GO:0005795,Golgi stack; GO:0005770,late endosome; GO:0000326,protein storage vacuole; GO:0048316,seed development	--	At1g49320	ref|XP_004148868.2|	USPL1_ARATH,RecName: Full=BURP domain protein USPL1 {ECO:0000303|PubMed:19639386}; AltName: Full=Unknown seed protein-like protein 1 {ECO:0000303|PubMed:19639386}; Short=AtUSPL1 {ECO:0000303|PubMed:19639386}; Flags: Precursor;	A0A0A0LIY2_CUCSA,SubName: Full=Uncharacterized protein {ECO:0000313|EMBL:KGN61783.1};
Cla016553	0	0	0	-2.662	GO:0016021,integral component of membrane; GO:0005886,plasma membrane; GO:0005524,ATP binding; GO:0004674,protein serine/threonine kinase activity; GO:0004675,transmembrane receptor protein serine/threonine kinase activity; GO:0007166,cell surface receptor signaling pathway; GO:0046777,protein autophosphorylation	--	At4g34440	ref|XP_008457929.1|	PERK5_ARATH,RecName: Full=Proline-rich receptor-like protein kinase PERK5; EC=2.7.11.1; AltName: Full=Proline-rich extensin-like receptor kinase 5; Short=AtPERK5;	A0A1S3C6T1_CUCME,SubName: Full=putative proline-rich receptor-like protein kinase PERK6 {ECO:0000313|RefSeq:XP_008457929.1};
Cla016609	-1.475	0	0	0	GO:0048046,apoplast; GO:0009507,chloroplast; GO:0009941,chloroplast envelope; GO:0009570,chloroplast stroma; GO:0016020,membrane; GO:0010287,plastoglobule; GO:0009579,thylakoid; GO:0004332,fructose-bisphosphate aldolase activity; GO:0006094,gluconeogenesis; GO:0006096,glycolytic process; GO:0009737,response to abscisic acid; GO:0046686,response to cadmium ion	K01623: ALDO; fructose-bisphosphate aldolase, class I [EC:4.1.2.13]	At2g01140	ref|XP_008461018.1|	ALFP2_ARATH,RecName: Full=Fructose-bisphosphate aldolase 2, chloroplastic {ECO:0000305}; Short=AtFBA2 {ECO:0000303|PubMed:22561114}; EC=4.1.2.13 {ECO:0000305}; Flags: Precursor;	A0A1S3CDS6_CUCME,RecName: Full=Fructose-bisphosphate aldolase {ECO:0000256|RuleBase:RU003994, ECO:0000256|SAAS:SAAS00336718}; EC=4.1.2.13 {ECO:0000256|RuleBase:RU003994, ECO:0000256|SAAS:SAAS00336718};
Cla016612	-1.023	0	0	0	GO:0008792,arginine decarboxylase activity; GO:0006527,arginine catabolic process; GO:0009446,putrescine biosynthetic process; GO:0008295,spermidine biosynthetic process	K01583: E4.1.1.19; arginine decarboxylase [EC:4.1.1.19]	At4g34710	ref|XP_008461023.1|	SPE1_PEA,RecName: Full=Arginine decarboxylase; Short=ADC; Short=ARGDC; EC=4.1.1.19;	A0A1S3CDT1_CUCME,RecName: Full=Arginine decarboxylase {ECO:0000256|RuleBase:RU003740}; EC=4.1.1.19 {ECO:0000256|RuleBase:RU003740};
Cla016621	6.594	0	0	0	GO:0005886,plasma membrane; GO:0009734,auxin-activated signaling pathway; GO:0007275,multicellular organism development; GO:0040008,regulation of growth	K14488: SAUR; SAUR family protein	At5g18080	ref|XP_008457626.1|	SAU24_ARATH,RecName: Full=Auxin-responsive protein SAUR24 {ECO:0000305}; AltName: Full=Protein SMALL AUXIN UP RNA 24 {ECO:0000303|PubMed:12036261};	A0A1S3C5H8_CUCME,SubName: Full=auxin-responsive protein SAUR24-like {ECO:0000313|RefSeq:XP_008457626.1};
Cla016674	0	0	0	-1.161	GO:0009707,chloroplast outer membrane; GO:0046509,1,2-diacylglycerol 3-beta-galactosyltransferase activity; GO:0035250,UDP-galactosyltransferase activity; GO:0016036,cellular response to phosphate starvation; GO:0006631,fatty acid metabolic process; GO:0019374,galactolipid metabolic process; GO:0009247,glycolipid biosynthetic process	K03715: MGD; 1,2-diacylglycerol 3-beta-galactosyltransferase [EC:2.4.1.46]	At5g20410	ref|XP_008457220.1|	MGDG2_ARATH,RecName: Full=Monogalactosyldiacylglycerol synthase 2, chloroplastic; Short=AtMGD2; EC=2.4.1.46; AltName: Full=MGDG synthase type B; Flags: Precursor;	A0A1S3C6A4_CUCME,SubName: Full=monogalactosyldiacylglycerol synthase 2, chloroplastic {ECO:0000313|RefSeq:XP_008457220.1};
Cla016685	0	0	-1.12	0	GO:0016021,integral component of membrane; GO:0005886,plasma membrane; GO:0005524,ATP binding; GO:0004675,transmembrane receptor protein serine/threonine kinase activity; GO:0007166,cell surface receptor signaling pathway; GO:0006468,protein phosphorylation	K04733: IRAK4; interleukin-1 receptor-associated kinase 4 [EC:2.7.11.1]	At3g01300	ref|XP_008457019.1|	Y3130_ARATH,RecName: Full=Receptor-like serine/threonine-protein kinase At3g01300; EC=2.7.11.1;	A0A1S3C5U1_CUCME,SubName: Full=probable receptor-like protein kinase At5g15080 {ECO:0000313|RefSeq:XP_008457019.1};
Cla016695	0	0	0	-1.562	--	--	--	ref|XP_022965828.1|	--	W9RLL1_9ROSA,SubName: Full=Blue copper protein {ECO:0000313|EMBL:EXB96872.1};
Cla016702	-1.308	0	0	0	GO:0005634,nucleus; GO:0009873,ethylene-activated signaling pathway; GO:0010105,negative regulation of ethylene-activated signaling pathway; GO:0016567,protein ubiquitination; GO:0009723,response to ethylene; GO:0006511,ubiquitin-dependent protein catabolic process	K14515: EBF1_2; EIN3-binding F-box protein	At2g25490	ref|XP_004139306.1|	EBF1_ARATH,RecName: Full=EIN3-binding F-box protein 1; AltName: Full=F-box/LRR-repeat protein 6;	A0A0A0LI26_CUCSA,SubName: Full=Grr1 {ECO:0000313|EMBL:KGN60684.1};
Cla016703	0	0	0	-1.332	--	--	At3g15760	gb|KGN60682.1|	--	A0A0A0LIY8_CUCSA,SubName: Full=Uncharacterized protein {ECO:0000313|EMBL:KGN60682.1};
Cla016705	-1.689	0	-1.042	-2.747	GO:0005783,endoplasmic reticulum; GO:0005634,nucleus; GO:0016036,cellular response to phosphate starvation; GO:0080040,positive regulation of cellular response to phosphate starvation	--	At5g20150	ref|XP_004139308.1|	SPX1_ARATH,RecName: Full=SPX domain-containing protein 1 {ECO:0000303|PubMed:18315545}; AltName: Full=Protein SPX DOMAIN GENE 1 {ECO:0000303|PubMed:18315545}; Short=AtSPX1 {ECO:0000303|PubMed:18315545};	A0A0A0LF68_CUCSA,SubName: Full=Uncharacterized protein {ECO:0000313|EMBL:KGN60680.1};
Cla016724	1.638	0	0	0	--	K10418: DYNLL; dynein light chain LC8-type	At5g20110	gb|KGN60666.1|	--	A0A0A0LKY0_CUCSA,SubName: Full=Uncharacterized protein {ECO:0000313|EMBL:KGN60666.1};
Cla016764	-1.385	0	0	0	GO:0005634,nucleus; GO:0003700,DNA binding transcription factor activity; GO:0043565,sequence-specific DNA binding; GO:0006351,transcription, DNA-templated	K09419: HSFF; heat shock transcription factor, other eukaryote	At3g24520	ref|XP_016901258.1|	HSFC1_ARATH,RecName: Full=Heat stress transcription factor C-1; Short=AtHsfC1; AltName: Full=AtHsf-08;	A0A1S4DZ61_CUCME,SubName: Full=heat stress transcription factor C-1-like {ECO:0000313|RefSeq:XP_016901258.1};
Cla016832	-1.218	0	0	0	--	--	At5g56880	ref|XP_022965986.1|	--	A0A1S3CB71_CUCME,SubName: Full=uncharacterized protein LOC103498512 {ECO:0000313|RefSeq:XP_008459356.1};
Cla016833	-1.64	-1.838	0	0	GO:0005783,endoplasmic reticulum; GO:0005773,vacuole; GO:0019139,cytokinin dehydrogenase activity; GO:0050660,flavin adenine dinucleotide binding; GO:0016614,oxidoreductase activity, acting on CH-OH group of donors; GO:0008131,primary amine oxidase activity; GO:0009823,cytokinin catabolic process	K00279: CKX; cytokinin dehydrogenase [EC:1.5.99.12]	At5g56970	ref|XP_011648605.1|	CKX3_ARATH,RecName: Full=Cytokinin dehydrogenase 3; EC=1.5.99.12; AltName: Full=Cytokinin oxidase 3; Short=AtCKX3; Short=CKO 3; Flags: Precursor;	A0A1S3C9Z6_CUCME,SubName: Full=cytokinin dehydrogenase 3-like {ECO:0000313|RefSeq:XP_008459369.1};
Cla016851	-1.428	0	0	0	--	K22048: MSL4S; mechanosensitive ion channel protein 4/5/6/7/8/9/10	At2g06520	ref|XP_011648590.1|	--	A0A0A0LIL7_CUCSA,SubName: Full=Uncharacterized protein {ECO:0000313|EMBL:KGN60517.1};
Cla016876	0	1.522	0	0	GO:0005829,cytosol; GO:0005507,copper ion binding; GO:0006952,defense response; GO:0009607,response to biotic stimulus; GO:0080184,response to phenylpropanoid; GO:0010043,response to zinc ion; GO:0010228,vegetative to reproductive phase transition of meristem	--	At1g14930	ref|XP_022155179.1|	ML328_ARATH,RecName: Full=MLP-like protein 328;	A0A1S3BPT7_CUCME,SubName: Full=MLP-like protein 328 {ECO:0000313|RefSeq:XP_008450254.1};
Cla016880	-1.298	0	0	0	GO:0005887,integral component of plasma membrane; GO:0008271,secondary active sulfate transmembrane transporter activity; GO:0015116,sulfate transmembrane transporter activity; GO:0015293,symporter activity	K17471: SULTR3; sulfate transporter 3	At1g23090	ref|XP_008454781.1|	SUT33_ARATH,RecName: Full=Probable sulfate transporter 3.3; AltName: Full=AST91;	A0A1S3BZD7_CUCME,SubName: Full=probable sulfate transporter 3.3 {ECO:0000313|RefSeq:XP_008454781.1};
Cla016892	2.376	0	0	0	GO:0102098,D-galacturonate reductase activity; GO:0019853,L-ascorbic acid biosynthetic process	K19642: GALUR; D-galacturonate reductase [EC:1.1.1.365]	At1g59960	ref|XP_008467071.1|	GALUR_FRAAN,RecName: Full=D-galacturonate reductase; Short=FaGalUR; EC=1.1.1.365; AltName: Full=Aldo-keto reductase 2;	A0A1S3CSP4_CUCME,SubName: Full=D-galacturonate reductase-like {ECO:0000313|RefSeq:XP_008467071.1};
Cla016898	1.999	0	0	0	GO:0005634,nucleus; GO:0005524,ATP binding; GO:0004386,helicase activity; GO:0009553,embryo sac development; GO:0010183,pollen tube guidance; GO:0009875,pollen-pistil interaction	--	At5g52090	ref|XP_011655120.1|	MAA3_ARATH,RecName: Full=Probable helicase MAGATAMA 3; EC=3.6.4.-; AltName: Full=SEN1-like protein;	A0A0A0KMQ3_CUCSA,SubName: Full=Uncharacterized protein {ECO:0000313|EMBL:KGN50868.1};
Cla016902	-1.439	0	0	0	--	--	--	ref|XP_004140415.1|	--	A0A0A0KPE8_CUCSA,SubName: Full=Uncharacterized protein {ECO:0000313|EMBL:KGN50779.1};
Cla016954	-1.256	0	0	0	GO:0005886,plasma membrane; GO:0005509,calcium ion binding; GO:0050832,defense response to fungus	K13448: CML; calcium-binding protein CML	At3g10190	ref|XP_008443339.2|	CML36_ARATH,RecName: Full=Probable calcium-binding protein CML36; AltName: Full=Calmodulin-like protein 36;	A0A1S3B7R8_CUCME,SubName: Full=probable calcium-binding protein CML35 {ECO:0000313|RefSeq:XP_008443339.2};
Cla017006	0	0	0	-2.79	GO:0016021,integral component of membrane; GO:0015171,amino acid transmembrane transporter activity; GO:0003333,amino acid transmembrane transport	K15015: SLC32A, VGAT; solute carrier family 32 (vesicular inhibitory amino acid transporter)	At5g15240	ref|XP_008443409.1|	AVT1J_ARATH,RecName: Full=Amino acid transporter AVT1J {ECO:0000305}; Short=AtAvt1J {ECO:0000303|PubMed:27925655};	A0A1S3B7H1_CUCME,SubName: Full=vacuolar amino acid transporter 1-like isoform X1 {ECO:0000313|RefSeq:XP_008443409.1};
Cla017008	0	-3.288	0	0	GO:0016021,integral component of membrane; GO:0015267,channel activity; GO:0015840,urea transport	K09874: NIP; aquaporin NIP	At4g18910	ref|NP_001267699.1|	NIP21_MAIZE,RecName: Full=Aquaporin NIP2-1; AltName: Full=NOD26-like intrinsic protein 2-1; AltName: Full=ZmNIP2-1; AltName: Full=ZmNIP2;1;	A0A1L7B7J0_CUCSA,SubName: Full=LSi1 {ECO:0000313|EMBL:APT69293.1};
Cla017036	0	1.55	0	-1.741	GO:0005783,endoplasmic reticulum; GO:0016021,integral component of membrane; GO:0031966,mitochondrial membrane; GO:0005739,mitochondrion; GO:0005524,ATP binding; GO:0016887,ATPase activity; GO:0010154,fruit development; GO:0009737,response to abscisic acid; GO:0009409,response to cold; GO:0009651,response to salt stress; GO:0009414,response to water deprivation; GO:0010431,seed maturation	K08900: BCS1; mitochondrial chaperone BCS1	At5g40010	ref|XP_023522825.1|	ASD_ARATH,RecName: Full=AAA-ATPase ASD, mitochondrial; EC=3.6.1.3 {ECO:0000269|PubMed:21359673}; AltName: Full=AAA-ATPase 1; AltName: Full=Protein ATPASE-IN-SEED-DEVELOPMENT {ECO:0000303|PubMed:21359673};	A0A0A0LCU9_CUCSA,SubName: Full=Uncharacterized protein {ECO:0000313|EMBL:KGN59603.1};
Cla017037	0	0	0	-1.086	GO:0005783,endoplasmic reticulum; GO:0016021,integral component of membrane; GO:0031966,mitochondrial membrane; GO:0005739,mitochondrion; GO:0005524,ATP binding; GO:0016887,ATPase activity; GO:0010154,fruit development; GO:0009737,response to abscisic acid; GO:0009409,response to cold; GO:0009651,response to salt stress; GO:0009414,response to water deprivation; GO:0010431,seed maturation	K08900: BCS1; mitochondrial chaperone BCS1	At5g40010	ref|XP_011652867.1|	ASD_ARATH,RecName: Full=AAA-ATPase ASD, mitochondrial; EC=3.6.1.3 {ECO:0000269|PubMed:21359673}; AltName: Full=AAA-ATPase 1; AltName: Full=Protein ATPASE-IN-SEED-DEVELOPMENT {ECO:0000303|PubMed:21359673};	A0A0A0LCU9_CUCSA,SubName: Full=Uncharacterized protein {ECO:0000313|EMBL:KGN59603.1};
Cla017042	-1.018	0	0	0	GO:0016787,hydrolase activity; GO:0046856,phosphatidylinositol dephosphorylation	K01099: INPP5B_F; inositol polyphosphate 5-phosphatase INPP5B/F [EC:3.1.3.36]	At2g37440	ref|XP_008443452.1|	IP5P8_ARATH,RecName: Full=Type I inositol polyphosphate 5-phosphatase 8 {ECO:0000305}; Short=At5PTase8 {ECO:0000305}; EC=3.1.3.- {ECO:0000305};	A0A1S3B848_CUCME,SubName: Full=type IV inositol polyphosphate 5-phosphatase 7-like isoform X2 {ECO:0000313|RefSeq:XP_008443452.1};
Cla017071	0	-1.087	0	0	GO:0016021,integral component of membrane; GO:0005886,plasma membrane; GO:0022857,transmembrane transporter activity	--	At5g40230	ref|XP_008443486.1|	WTR42_ARATH,RecName: Full=WAT1-related protein At5g40240;	A0A1S3B850_CUCME,RecName: Full=WAT1-related protein {ECO:0000256|RuleBase:RU363077};
Cla017073	-1.002	0	0	0	--	--	At1g70280	ref|XP_004141183.2|	--	A0A0A0LCX9_CUCSA,SubName: Full=Uncharacterized protein {ECO:0000313|EMBL:KGN59643.1};
Cla017093	-1.523	0	0	0	GO:0009507,chloroplast; GO:0009569,chloroplast starch grain; GO:0009570,chloroplast stroma; GO:0043036,starch grain; GO:0019203,carbohydrate phosphatase activity; GO:0008138,protein tyrosine/serine/threonine phosphatase activity; GO:0005983,starch catabolic process	--	At3g01510_1	gb|ONI19580.1|	LSF1_ARATH,RecName: Full=Phosphoglucan phosphatase LSF1, chloroplastic; EC=3.1.3.-; AltName: Full=Phosphoglucan phosphatase like sex Four1; AltName: Full=Protein LIKE SEX4 1; Flags: Precursor;	A0A251Q871_PRUPE,SubName: Full=Uncharacterized protein {ECO:0000313|EMBL:ONI19580.1};
Cla017143	-1.29	0	0	0	GO:0009941,chloroplast envelope; GO:0005634,nucleus; GO:0003677,DNA binding; GO:0003700,DNA binding transcription factor activity; GO:0046983,protein dimerization activity; GO:0042538,hyperosmotic salinity response; GO:0006355,regulation of transcription, DNA-templated; GO:0006351,transcription, DNA-templated	K22484: CBF1; transcriptional regulator CBF1	At2g41130	ref|XP_022973344.1|	BH106_ARATH,RecName: Full=Transcription factor bHLH106; AltName: Full=Basic helix-loop-helix protein 106; Short=AtbHLH106; Short=bHLH 106; AltName: Full=Transcription factor EN 56; AltName: Full=bHLH transcription factor bHLH106;	A0A1S3CMN2_CUCME,SubName: Full=transcription factor bHLH106-like {ECO:0000313|RefSeq:XP_008464948.1};
Cla017151	0	1.246	-1.151	0	GO:0005509,calcium ion binding; GO:0005544,calcium-dependent phospholipid binding; GO:0009409,response to cold; GO:0009408,response to heat; GO:0009651,response to salt stress; GO:0009414,response to water deprivation	K17098: ANNAT; annexin D	At5g65020	ref|XP_004141201.1|	ANXD8_ARATH,RecName: Full=Annexin D8; AltName: Full=AnnAt8;	A0A0A0LD60_CUCSA,SubName: Full=Uncharacterized protein {ECO:0000313|EMBL:KGN59733.1};
Cla017176	0	0	0	-1.133	GO:0005634,nucleus; GO:0005667,transcription factor complex; GO:0003682,chromatin binding; GO:0003700,DNA binding transcription factor activity; GO:0000977,RNA polymerase II regulatory region sequence-specific DNA binding; GO:0001085,RNA polymerase II transcription factor binding; GO:0001228,transcriptional activator activity, RNA polymerase II transcription regulatory region sequence-specific DN…	--	At4g32890	ref|XP_004141141.1|	GATA9_ARATH,RecName: Full=GATA transcription factor 9;	A0A0A0LD86_CUCSA,SubName: Full=Uncharacterized protein {ECO:0000313|EMBL:KGN59763.1};
Cla017226	0	1.153	0	0	GO:0016207,4-coumarate-CoA ligase activity; GO:0005524,ATP binding; GO:0009698,phenylpropanoid metabolic process	K01904: 4CL; 4-coumarate--CoA ligase [EC:6.2.1.12]	At3g21240	gb|KGN58641.1|	4CL1_TOBAC,RecName: Full=4-coumarate--CoA ligase 1; Short=4CL 1; EC=6.2.1.12; AltName: Full=4-coumaroyl-CoA synthase 1;	A0A0A0LF00_CUCSA,SubName: Full=Uncharacterized protein {ECO:0000313|EMBL:KGN58641.1};
Cla017247	-1.439	0	0	0	GO:0005783,endoplasmic reticulum; GO:0005789,endoplasmic reticulum membrane; GO:0016021,integral component of membrane; GO:0009506,plasmodesma; GO:0009511,plasmodesmatal endoplasmic reticulum; GO:0008565,protein transporter activity; GO:0016757,transferase activity, transferring glycosyl groups; GO:0034613,cellular protein localization; GO:0009908,flower development; GO:0048574,long-day photoperi…	--	At5g48060	ref|XP_004149608.1|	FTIP1_ARATH,RecName: Full=FT-interacting protein 1 {ECO:0000303|PubMed:22529749};	A0A0A0LCF8_CUCSA,SubName: Full=Uncharacterized protein {ECO:0000313|EMBL:KGN58614.1};
Cla017256	0	0	1.496	0	GO:0009507,chloroplast; GO:0000166,nucleotide binding; GO:0006281,DNA repair	--	At3g20820	ref|XP_022152551.1|	DR100_ARATH,RecName: Full=DNA damage-repair/toleration protein DRT100; Flags: Precursor;	A0A1S4E3F2_CUCME,SubName: Full=DNA-damage-repair/toleration protein DRT100-like {ECO:0000313|RefSeq:XP_016902753.1};
Cla017264	0	0	0	1.002	GO:0000781,chromosome, telomeric region; GO:0005634,nucleus; GO:0000333,telomerase catalytic core complex; GO:0046872,metal ion binding; GO:0003720,telomerase activity; GO:0070034,telomerase RNA binding; GO:0003721,telomerase RNA reverse transcriptase activity; GO:0042162,telomeric DNA binding; GO:0050000,chromosome localization; GO:0051276,chromosome organization; GO:0010073,meristem maintenance…	K11126: TERT, EST2; telomerase reverse transcriptase [EC:2.7.7.49]	At5g16850	ref|XP_008461793.1|	TERT_ARATH,RecName: Full=Telomerase reverse transcriptase; Short=AtTERT; EC=2.7.7.49;	A0A1S3CFD5_CUCME,SubName: Full=telomerase reverse transcriptase {ECO:0000313|RefSeq:XP_008461793.1};
Cla017268	-1.242	0	0	0	--	--	At3g08490	ref|XP_008461795.2|	--	A0A1S3CFE9_CUCME,SubName: Full=uncharacterized protein LOC103500312 {ECO:0000313|RefSeq:XP_008461795.2};
Cla017276	-1.283	0	0	0	--	--	--	gb|KGN58582.1|	--	A0A0A0LD14_CUCSA,SubName: Full=Uncharacterized protein {ECO:0000313|EMBL:KGN58582.1};
Cla017301	0	1.208	0	0	GO:0005576,extracellular region; GO:0004185,serine-type carboxypeptidase activity; GO:0051603,proteolysis involved in cellular protein catabolic process	K16297: SCPL-II; serine carboxypeptidase-like clade II [EC:3.4.16.-]	At5g08260	ref|XP_023529145.1|	SCP35_ARATH,RecName: Full=Serine carboxypeptidase-like 35; EC=3.4.16.-; Flags: Precursor;	A0A1S3CH37_CUCME,RecName: Full=Carboxypeptidase {ECO:0000256|RuleBase:RU361156}; EC=3.4.16.- {ECO:0000256|RuleBase:RU361156};
Cla017313	0	3.151	0	0	GO:0016021,integral component of membrane; GO:0005886,plasma membrane; GO:0022857,transmembrane transporter activity	--	At1g65730	ref|XP_004148573.1|	YSL7_ARATH,RecName: Full=Probable metal-nicotianamine transporter YSL7; AltName: Full=Protein YELLOW STRIPE LIKE 7; Short=AtYSL7;	A0A0A0LCX3_CUCSA,SubName: Full=Uncharacterized protein {ECO:0000313|EMBL:KGN58517.1};
Cla017325	-1.629	0	0	0	GO:0009941,chloroplast envelope; GO:0009535,chloroplast thylakoid membrane; GO:0016021,integral component of membrane; GO:0009522,photosystem I; GO:0009523,photosystem II; GO:0010287,plastoglobule; GO:0016168,chlorophyll binding; GO:0046872,metal ion binding; GO:0031409,pigment binding; GO:0009768,photosynthesis, light harvesting in photosystem I; GO:0018298,protein-chromophore linkage; GO:000941…	K08912: LHCB1; light-harvesting complex II chlorophyll a/b binding protein 1	At2g34430	ref|XP_008447450.1|	CB2G_SOLLC,RecName: Full=Chlorophyll a-b binding protein 3C, chloroplastic; AltName: Full=LHCII type I CAB-3C; Short=LHCP; Flags: Precursor;	A0A1S3BHH5_CUCME,RecName: Full=Chlorophyll a-b binding protein, chloroplastic {ECO:0000256|RuleBase:RU363080};
Cla017329	1.472	0	0	0	GO:0005618,cell wall; GO:0005576,extracellular region; GO:0004650,polygalacturonase activity; GO:0005975,carbohydrate metabolic process; GO:0009831,plant-type cell wall modification involved in multidimensional cell growth	--	At1g02460	ref|XP_016900401.1|	PGLR4_ARATH,RecName: Full=Polygalacturonase At1g48100; Short=PG; EC=3.2.1.15; AltName: Full=Pectinase At1g48100; Flags: Precursor;	A0A1S4DWP4_CUCME,SubName: Full=polygalacturonase At1g48100 {ECO:0000313|RefSeq:XP_016900401.1};
Cla017331	0	0	0	-1.681	GO:0005887,integral component of plasma membrane; GO:0005886,plasma membrane; GO:0015301,anion:anion antiporter activity; GO:0005452,inorganic anion exchanger activity; GO:0051453,regulation of intracellular pH; GO:0048364,root development	--	At3g62270	ref|XP_008447454.1|	BOR2_ARATH,RecName: Full=Probable boron transporter 2;	A0A1S3BID7_CUCME,SubName: Full=boron transporter 1 {ECO:0000313|RefSeq:XP_008447454.1};
Cla017347	-3.873	0	0	0	GO:0005634,nucleus; GO:0003677,DNA binding; GO:0003700,DNA binding transcription factor activity; GO:0046983,protein dimerization activity; GO:0030154,cell differentiation; GO:2000280,regulation of root development; GO:0006355,regulation of transcription, DNA-templated; GO:0006351,transcription, DNA-templated	--	At2g47270	gb|KGN58133.1|	BH151_ARATH,RecName: Full=Transcription factor UPBEAT1; AltName: Full=Basic helix-loop-helix protein 151; Short=AtbHLH151; Short=bHLH 151; AltName: Full=Transcription factor EN 146; AltName: Full=Transcription factor bHLH151; AltName: Full=bHLH transcription factor bHLH151;	A0A0A0L8J6_CUCSA,SubName: Full=Uncharacterized protein {ECO:0000313|EMBL:KGN58133.1};
Cla017363	-1.661	0	0	0	--	--	At5g38070	ref|XP_016901466.1|	--	A0A1S4DZR9_CUCME,SubName: Full=uncharacterized protein LOC103494737 {ECO:0000313|RefSeq:XP_016901466.1};
Cla017383	-1.08	-1.22	0	0	GO:0005794,Golgi apparatus; GO:0000139,Golgi membrane; GO:0016021,integral component of membrane; GO:0016760,cellulose synthase (UDP-forming) activity; GO:0046527,glucosyltransferase activity; GO:0051753,mannan synthase activity; GO:0000919,cell plate assembly; GO:0042546,cell wall biogenesis; GO:0071555,cell wall organization; GO:0030244,cellulose biosynthetic process; GO:0071669,plant-type cell…	K00770: E2.4.2.24; 1,4-beta-D-xylan synthase [EC:2.4.2.24]	At1g02730	ref|XP_008454309.1|	CSLD5_ARATH,RecName: Full=Cellulose synthase-like protein D5; Short=AtCslD5; EC=2.4.1.-;	A0A1S3BZ29_CUCME,SubName: Full=cellulose synthase-like protein D5 {ECO:0000313|RefSeq:XP_008454309.1};
Cla017403	1.939	0	0	0	--	--	At4g02340	ref|XP_022934345.1|	--	A0A0A0KY86_CUCSA,SubName: Full=Uncharacterized protein {ECO:0000313|EMBL:KGN52816.1};
Cla017416	0	0	0	-1.72	GO:0009509,chromoplast; GO:0052727,capsanthin synthase activity; GO:0052728,capsorubin synthase activity; GO:0016705,oxidoreductase activity, acting on paired donors, with incorporation or reduction of molecular oxygen; GO:0016117,carotenoid biosynthetic process	K14593: CCS1; capsanthin/capsorubin synthase [EC:5.3.99.8]	At3g10230	ref|XP_023520686.1|	CCS_CITSI,RecName: Full=Capsanthin/capsorubin synthase, chromoplastic; EC=5.3.99.8; Flags: Precursor;	A0A1S3BZM2_CUCME,SubName: Full=capsanthin/capsorubin synthase, chromoplastic-like {ECO:0000313|RefSeq:XP_008454352.1};
Cla017419	0	0	0	-1.157	GO:0005794,Golgi apparatus; GO:0016021,integral component of membrane; GO:0000325,plant-type vacuole; GO:0005774,vacuolar membrane; GO:0005773,vacuole; GO:0005524,ATP binding; GO:0042626,ATPase activity, coupled to transmembrane movement of substances; GO:0008559,xenobiotic transmembrane transporting ATPase activity; GO:0055085,transmembrane transport	K05666: ABCC2; ATP-binding cassette, subfamily C (CFTR/MRP), member 2	At3g62700	ref|XP_008454353.1|	AB14C_ARATH,RecName: Full=ABC transporter C family member 14; Short=ABC transporter ABCC.14; Short=AtABCC14; EC=3.6.3.44; AltName: Full=ATP-energized glutathione S-conjugate pump 10; AltName: Full=Glutathione S-conjugate-transporting ATPase 10; AltName: Full=Multidrug resistance-associated protein 10;	A0A1S3BXX2_CUCME,SubName: Full=ABC transporter C family member 14-like {ECO:0000313|RefSeq:XP_008454353.1, ECO:0000313|RefSeq:XP_008454354.1};
Cla017433	0	0	0	-1.388	GO:0016021,integral component of membrane; GO:0005886,plasma membrane; GO:0022857,transmembrane transporter activity	--	At5g07050	ref|XP_004136769.2|	WTR38_ARATH,RecName: Full=WAT1-related protein At5g07050;	A0A0A0LC92_CUCSA,RecName: Full=WAT1-related protein {ECO:0000256|RuleBase:RU363077};
Cla017434	0	0	0	-2.581	GO:0005789,endoplasmic reticulum membrane; GO:0016021,integral component of membrane; GO:0020037,heme binding; GO:0005506,iron ion binding; GO:0004497,monooxygenase activity; GO:0016705,oxidoreductase activity, acting on paired donors, with incorporation or reduction of molecular oxygen	K13407: CYP94A1; fatty acid omega-hydroxylase [EC:1.14.-.-]	At3g56630	ref|XP_022935257.1|	C94A1_VICSA,RecName: Full=Cytochrome P450 94A1; EC=1.14.-.-; AltName: Full=P450-dependent fatty acid omega-hydroxylase;	A0A1S3B728_CUCME,SubName: Full=cytochrome P450 94A1-like {ECO:0000313|RefSeq:XP_008443231.1};
Cla017457	0	0	-1.108	0	GO:0005871,kinesin complex; GO:0005874,microtubule; GO:0005524,ATP binding; GO:0016887,ATPase activity; GO:0008017,microtubule binding; GO:0003777,microtubule motor activity; GO:0007018,microtubule-based movement	K10406: KIFC2_3; kinesin family member C2/C3	At1g73860	ref|XP_011652155.1|	KN14P_ARATH,RecName: Full=Kinesin-like protein KIN-14P {ECO:0000305};	A0A0A0LH84_CUCSA,SubName: Full=Uncharacterized protein {ECO:0000313|EMBL:KGN59396.1};
Cla017463	0	0	0	2.686	GO:0005634,nucleus; GO:0003677,DNA binding; GO:0006355,regulation of transcription, DNA-templated; GO:0006351,transcription, DNA-templated	K09422: MYBP; transcription factor MYB, plant	At1g08810	ref|NP_001267555.1|	MYB06_ANTMA,RecName: Full=Myb-related protein 306;	Q0ZPA2_CUCSA,SubName: Full=MYB transcription factor {ECO:0000313|EMBL:ABC33923.1};
Cla017483	-1.289	0	0	0	GO:0016021,integral component of membrane; GO:0005524,ATP binding; GO:0016887,ATPase activity	--	At3g53480	ref|XP_011652141.1|	PDR3_TOBAC,RecName: Full=Pleiotropic drug resistance protein 3; AltName: Full=NtPDR3;	A0A0A0LBH1_CUCSA,SubName: Full=Uncharacterized protein {ECO:0000313|EMBL:KGN59365.1};
Cla017492	0	1.904	0	0	--	--	At3g57450	ref|XP_011652134.1|	--	A0A0A0LEL3_CUCSA,SubName: Full=Uncharacterized protein {ECO:0000313|EMBL:KGN59359.1};
Cla017516	1.084	0	0	0	GO:0005634,nucleus; GO:0003677,DNA binding; GO:0003700,DNA binding transcription factor activity; GO:0046983,protein dimerization activity; GO:0006355,regulation of transcription, DNA-templated; GO:0006351,transcription, DNA-templated	--	At3g57800	ref|XP_004136583.1|	BH048_ARATH,RecName: Full=Transcription factor bHLH48; AltName: Full=Basic helix-loop-helix protein 48; Short=AtbHLH48; Short=bHLH 48; AltName: Full=Transcription factor EN 97; AltName: Full=bHLH transcription factor bHLH048;	A0A0A0LEI6_CUCSA,SubName: Full=Uncharacterized protein {ECO:0000313|EMBL:KGN59329.1};
Cla017517	2.35	0	0	0	GO:0009507,chloroplast	--	At3g57810	ref|XP_008443087.1|	OTU_ARATH,RecName: Full=OTU domain-containing protein At3g57810;	A0A1S3B6T1_CUCME,SubName: Full=OTU domain-containing protein At3g57810 isoform X1 {ECO:0000313|RefSeq:XP_008443087.1, ECO:0000313|RefSeq:XP_008443088.1, ECO:0000313|RefSeq:XP_008443089.1};
Cla017518	0	0	1.521	0	GO:0005634,nucleus; GO:0001046,core promoter sequence-specific DNA binding; GO:0003700,DNA binding transcription factor activity; GO:0046983,protein dimerization activity; GO:0001228,transcriptional activator activity, RNA polymerase II transcription regulatory region sequence-specific DNA binding; GO:0048573,photoperiodism, flowering; GO:0006355,regulation of transcription, DNA-templated; GO:000…	--	At2g42280	ref|XP_008443086.1|	BH130_ARATH,RecName: Full=Transcription factor bHLH130; AltName: Full=Basic helix-loop-helix protein 130; Short=AtbHLH130; Short=bHLH 130; AltName: Full=Transcription factor EN 69; AltName: Full=bHLH transcription factor bHLH130;	A0A1S3B7A4_CUCME,SubName: Full=transcription factor bHLH130 {ECO:0000313|RefSeq:XP_008443086.1};
Cla017529	0	0	1.144	1.091	GO:0005634,nucleus; GO:0003677,DNA binding; GO:0046872,metal ion binding; GO:0006355,regulation of transcription, DNA-templated; GO:0006351,transcription, DNA-templated	--	At2g42200	ref|XP_004136576.1|	SPL17_ORYSJ,RecName: Full=Squamosa promoter-binding-like protein 17;	A0A0A0LBC1_CUCSA,SubName: Full=Uncharacterized protein {ECO:0000313|EMBL:KGN59315.1};
Cla017530	0	0	1.329	0	GO:0005634,nucleus; GO:0003677,DNA binding; GO:0003700,DNA binding transcription factor activity; GO:0046872,metal ion binding; GO:0048653,anther development; GO:0042127,regulation of cell proliferation; GO:0008361,regulation of cell size; GO:0006355,regulation of transcription, DNA-templated; GO:0006351,transcription, DNA-templated; GO:0010228,vegetative to reproductive phase transition of meris…	--	At3g57920	ref|XP_004136576.1|	SPL15_ARATH,RecName: Full=Squamosa promoter-binding-like protein 15;	A0A0A0LBC1_CUCSA,SubName: Full=Uncharacterized protein {ECO:0000313|EMBL:KGN59315.1};
Cla017568	0	1.23	0	0	--	--	At5g06610	ref|XP_008443008.1|	--	A0A1S3B7U5_CUCME,SubName: Full=uncharacterized protein LOC103486737 {ECO:0000313|RefSeq:XP_008443008.1};
Cla017592	0	0	0	-1.152	GO:0016021,integral component of membrane; GO:0005886,plasma membrane; GO:0005524,ATP binding; GO:0042626,ATPase activity, coupled to transmembrane movement of substances; GO:0009414,response to water deprivation; GO:0010148,transpiration	--	At3g52310	ref|XP_008442971.1|	AB22G_ARATH,RecName: Full=ABC transporter G family member 22; Short=ABC transporter ABCG.22; Short=AtABCG22; AltName: Full=White-brown complex homolog protein 23; Short=AtWBC23;	A0A1S3B7R5_CUCME,SubName: Full=ABC transporter G family member 22 isoform X2 {ECO:0000313|RefSeq:XP_008442971.1};
Cla017626	0	0	-1.404	-1.662	GO:0016021,integral component of membrane; GO:0009705,plant-type vacuole membrane; GO:0015140,malate transmembrane transporter activity	--	At3g11680	ref|XP_008442919.1|	ALMT8_ARATH,RecName: Full=Aluminum-activated malate transporter 8; Short=AtALMT8;	A0A1S3B7M1_CUCME,SubName: Full=aluminum-activated malate transporter 8-like {ECO:0000313|RefSeq:XP_008442919.1};
Cla017638	0	1.699	0	-1.277	GO:0046658,anchored component of plasma membrane; GO:0009507,chloroplast; GO:0016021,integral component of membrane; GO:0009506,plasmodesma; GO:0004871,signal transducer activity; GO:0051607,defense response to virus; GO:0010150,leaf senescence; GO:0051707,response to other organism	--	At2g35980	ref|XP_008442908.1|	NHL10_ARATH,RecName: Full=NDR1/HIN1-like protein 10 {ECO:0000303|PubMed:14666423}; Short=AtNHL10 {ECO:0000305}; AltName: Full=Protein YELLOW-LEAF-SPECIFIC GENE 9 {ECO:0000303|PubMed:11230571};	A0A1S3B7L1_CUCME,SubName: Full=protein YLS9 {ECO:0000313|RefSeq:XP_008442908.1};
Cla017644	0	0	0	-1.264	--	K01379: CTSD; cathepsin D [EC:3.4.23.5]	At3g52500	ref|XP_008442902.1|	--	A0A1S3B6B5_CUCME,SubName: Full=aspartic proteinase nepenthesin-2 {ECO:0000313|RefSeq:XP_008442902.1};
Cla017659	0	1.702	0	0	GO:0016491,oxidoreductase activity	K09841: ABA2; xanthoxin dehydrogenase [EC:1.1.1.288]	At2g47140	dbj|BAA89230.1|	TPRL1_ERYCB,RecName: Full=Tropinone reductase-like 1; EC=1.1.1.-;	Q9SBM0_CITLA,SubName: Full=Wts2L {ECO:0000313|EMBL:BAA89230.1};
Cla017674	0	0	-1.03	-2.281	GO:0005618,cell wall; GO:0005576,extracellular region; GO:0004575,sucrose alpha-glucosidase activity; GO:0005975,carbohydrate metabolic process	K01193: INV, sacA; beta-fructofuranosidase [EC:3.2.1.26]	At2g36190	ref|XP_008442862.1|	INV1_DAUCA,RecName: Full=Beta-fructofuranosidase, insoluble isoenzyme 1; EC=3.2.1.26; AltName: Full=Cell wall beta-fructosidase 1; AltName: Full=Invertase 1; AltName: Full=Sucrose hydrolase 1; Flags: Precursor;	A0A1S3B7H3_CUCME,SubName: Full=beta-fructofuranosidase, insoluble isoenzyme 1 {ECO:0000313|RefSeq:XP_008442862.1};
Cla017687	0	-1.203	0	-2.403	GO:0009570,chloroplast stroma; GO:0005783,endoplasmic reticulum; GO:0004089,carbonate dehydratase activity; GO:0008270,zinc ion binding; GO:0006730,one-carbon metabolic process	K01674: cah; carbonic anhydrase [EC:4.2.1.1]	At3g52720	ref|XP_008442846.1|	ATCA1_ARATH,RecName: Full=Alpha carbonic anhydrase 1, chloroplastic; Short=AtaCA1; Short=AtalphaCA1; EC=4.2.1.1; AltName: Full=Alpha carbonate dehydratase 1; Flags: Precursor;	A0A1S3B6Q0_CUCME,SubName: Full=alpha carbonic anhydrase 1, chloroplastic {ECO:0000313|RefSeq:XP_008442846.1};
Cla017712	0	0	1.106	0	GO:0016021,integral component of membrane; GO:0005886,plasma membrane; GO:0005524,ATP binding; GO:0042626,ATPase activity, coupled to transmembrane movement of substances	--	At2g36380	ref|XP_008442813.1|	AB34G_ARATH,RecName: Full=ABC transporter G family member 34; Short=ABC transporter ABCG.34; Short=AtABCG34; AltName: Full=Pleiotropic drug resistance protein 6;	A0A1S3B6M1_CUCME,SubName: Full=pleiotropic drug resistance protein 2-like isoform X1 {ECO:0000313|RefSeq:XP_008442813.1};
Cla017726	0	0	0	-2.504	GO:0005768,endosome; GO:0005794,Golgi apparatus; GO:0016021,integral component of membrane; GO:0005886,plasma membrane; GO:0005802,trans-Golgi network; GO:0048544,recognition of pollen	--	At5g03700	ref|XP_008442800.1|	Y5370_ARATH,RecName: Full=PAN domain-containing protein At5g03700; Flags: Precursor;	A0A1S3B7B8_CUCME,SubName: Full=PAN domain-containing protein At5g03700 {ECO:0000313|RefSeq:XP_008442800.1};
Cla017739	2.25	0	0	0	GO:0020037,heme binding; GO:0005506,iron ion binding; GO:0004497,monooxygenase activity; GO:0016705,oxidoreductase activity, acting on paired donors, with incorporation or reduction of molecular oxygen	K20618: CYP76A; cytochrome P450 family 76 subfamily A	At3g52970	ref|XP_004138005.1|	C76A2_SOLME,RecName: Full=Cytochrome P450 76A2; EC=1.14.-.-; AltName: Full=CYPLXXVIA2; AltName: Full=Cytochrome P-450EG7;	A0A0A0LEE2_CUCSA,SubName: Full=Uncharacterized protein {ECO:0000313|EMBL:KGN59047.1};
Cla017749	1.158	0	0	0	GO:0005737,cytoplasm; GO:0005634,nucleus; GO:0003723,RNA binding; GO:0006417,regulation of translation	K13126: PABPC; polyadenylate-binding protein	At2g36660	ref|XP_022144571.1|	PABP7_ARATH,RecName: Full=Polyadenylate-binding protein 7; Short=PABP-7; Short=Poly(A)-binding protein 7;	A0A1S3B6I1_CUCME,RecName: Full=Polyadenylate-binding protein {ECO:0000256|RuleBase:RU362004}; Short=PABP {ECO:0000256|RuleBase:RU362004};
Cla017769	-1.257	0	0	0	GO:0043231,intracellular membrane-bounded organelle; GO:0080043,quercetin 3-O-glucosyltransferase activity; GO:0080044,quercetin 7-O-glucosyltransferase activity; GO:0008152,metabolic process	--	At2g36780	ref|XP_008442744.1|	U73C3_ARATH,RecName: Full=UDP-glycosyltransferase 73C3; EC=2.4.1.-;	A0A1S3B739_CUCME,RecName: Full=Glycosyltransferase {ECO:0000256|RuleBase:RU362057}; EC=2.4.1.- {ECO:0000256|RuleBase:RU362057};
Cla017773	2.522	0	0	0	GO:0016021,integral component of membrane; GO:0043231,intracellular membrane-bounded organelle; GO:0050502,cis-zeatin O-beta-D-glucosyltransferase activity; GO:0046527,glucosyltransferase activity; GO:0080043,quercetin 3-O-glucosyltransferase activity; GO:0080046,quercetin 4'-O-glucosyltransferase activity; GO:0080044,quercetin 7-O-glucosyltransferase activity; GO:0050403,trans-zeatin O-beta-D-gl…	--	At2g36800	ref|XP_008442743.1|	U73C5_ARATH,RecName: Full=UDP-glycosyltransferase 73C5; EC=2.4.1.-; AltName: Full=Cytokinin-O-glucosyltransferase 3; AltName: Full=Deoxynivalenol-glucosyl-transferase 1; AltName: Full=Zeatin O-glucosyltransferase 3; Short=AtZOG3;	A0A1S3B6F6_CUCME,RecName: Full=Glycosyltransferase {ECO:0000256|RuleBase:RU362057}; EC=2.4.1.- {ECO:0000256|RuleBase:RU362057};
Cla017784	0	-2.892	0	0	GO:0009570,chloroplast stroma; GO:0004089,carbonate dehydratase activity; GO:0008270,zinc ion binding; GO:0006730,one-carbon metabolic process	K01674: cah; carbonic anhydrase [EC:4.2.1.1]	At1g08080	ref|XP_008442729.2|	ATCA7_ARATH,RecName: Full=Alpha carbonic anhydrase 7; Short=AtaCA7; Short=AtalphaCA7; EC=4.2.1.1; AltName: Full=Alpha carbonate dehydratase 7; Flags: Precursor;	A0A1S3B753_CUCME,SubName: Full=alpha carbonic anhydrase 7-like {ECO:0000313|RefSeq:XP_008442729.2};
Cla017819	-1.623	0	0	0	--	--	At5g03230	ref|XP_023005909.1|	--	A0A1S3B5S2_CUCME,SubName: Full=uncharacterized protein LOC103486480 {ECO:0000313|RefSeq:XP_008442681.1};
Cla017821	2.744	0	0	0	GO:0005887,integral component of plasma membrane; GO:0009506,plasmodesma; GO:0015250,water channel activity; GO:0080170,hydrogen peroxide transmembrane transport; GO:0034220,ion transmembrane transport; GO:0009737,response to abscisic acid; GO:0048767,root hair elongation	K09872: PIP; aquaporin PIP	At5g60660	ref|XP_008442677.1|	PIP24_ARATH,RecName: Full=Probable aquaporin PIP2-4; AltName: Full=Plasma membrane intrinsic protein 2.4; Short=AtPIP2;4; Contains: RecName: Full=Probable aquaporin PIP2-4, N-terminally processed;	A0A1S3B699_CUCME,SubName: Full=probable aquaporin PIP2-4 {ECO:0000313|RefSeq:XP_008442677.1};
Cla017825	-1.056	0	0	0	--	--	At5g60580	ref|XP_004137969.1|	--	A0A0A0LAX0_CUCSA,SubName: Full=Uncharacterized protein {ECO:0000313|EMBL:KGN58953.1};
Cla017829	1.061	0	0	0	GO:0005829,cytosol; GO:0009505,plant-type cell wall; GO:0009506,plasmodesma; GO:0020037,heme binding; GO:0046872,metal ion binding; GO:0004601,peroxidase activity; GO:0050832,defense response to fungus; GO:0042744,hydrogen peroxide catabolic process; GO:0009664,plant-type cell wall organization; GO:0006979,response to oxidative stress; GO:0048511,rhythmic process	K00430: E1.11.1.7; peroxidase [EC:1.11.1.7]	At2g37130	gb|ACM45784.1|	PER21_ARATH,RecName: Full=Peroxidase 21; Short=Atperox P21; EC=1.11.1.7; AltName: Full=ATP2a/ATP2b; AltName: Full=PRXR5; Flags: Precursor;	B9VRZ4_CUCSA,SubName: Full=Peroxidase {ECO:0000313|EMBL:ACM45784.1}; EC=1.11.1.7 {ECO:0000313|EMBL:ACM45784.1}; Flags: Fragment;
Cla017833	0	0	0	-1.027	--	--	At3g09730	ref|XP_011651948.1|	--	A0A0A0LFR3_CUCSA,SubName: Full=Uncharacterized protein {ECO:0000313|EMBL:KGN58946.1};
Cla017861	0	0	0	-1.155	GO:0005887,integral component of plasma membrane; GO:0005886,plasma membrane; GO:0012506,vesicle membrane; GO:0015075,ion transmembrane transporter activity; GO:0005460,UDP-glucose transmembrane transporter activity; GO:0010044,response to aluminum ion	K02069: ABC.X2.P; putative ABC transport system permease protein	At2g37330	ref|XP_008442603.1|	ALS3_ARATH,RecName: Full=Protein ALUMINUM SENSITIVE 3; AltName: Full=ABC transporter I family member 16; Short=ABC transporter ABCI.16; Short=AtABCI16; AltName: Full=ybbM homolog protein;	A0A1S3B6R0_CUCME,SubName: Full=protein ALUMINUM SENSITIVE 3 {ECO:0000313|RefSeq:XP_008442603.1};
Cla017910	-1.279	0	0	0	--	K05909: E1.10.3.2; laccase [EC:1.10.3.2]	--	ref|XP_022935020.1|	--	A0A1S3B5E7_CUCME,SubName: Full=uncharacterized protein LOC103486375 {ECO:0000313|RefSeq:XP_008442527.1};
Cla017921	1.11	0	0	0	--	--	At2g37730	ref|XP_022935184.1|	--	A0A218X993_PUNGR,SubName: Full=Uncharacterized protein {ECO:0000313|EMBL:OWM81795.1};
Cla017922	1.104	0	0	0	--	--	--	gb|KGN58844.1|	--	A0A0A0LD32_CUCSA,SubName: Full=Uncharacterized protein {ECO:0000313|EMBL:KGN58844.1};
Cla017923	1.109	0	0	0	GO:0016491,oxidoreductase activity	K08081: TR1; tropinone reductase I [EC:1.1.1.206]	At5g06060	ref|XP_008442514.1|	TRNH_DATST,RecName: Full=Tropinone reductase homolog; EC=1.1.1.-; AltName: Full=P29X;	A0A1S3B6I2_CUCME,SubName: Full=tropinone reductase homolog {ECO:0000313|RefSeq:XP_008442514.1};
Cla017926	0	0	1.924	0	--	--	At5g02090	ref|XP_011651886.1|	--	A0A0A0LD26_CUCSA,SubName: Full=Uncharacterized protein {ECO:0000313|EMBL:KGN58839.1};
Cla017935	0	0	0	-1.312	GO:0005930,axoneme; GO:0097014,ciliary plasm; GO:0030286,dynein complex; GO:0005874,microtubule; GO:0031514,motile cilium; GO:0003774,motor activity; GO:0007017,microtubule-based process; GO:0044458,motile cilium assembly	--	At1g52250	ref|XP_008442502.1|	DYL1_CHLRE,RecName: Full=Dynein 8 kDa light chain, flagellar outer arm;	A0A1S3B5U2_CUCME,SubName: Full=dynein light chain 1, cytoplasmic-like {ECO:0000313|RefSeq:XP_008442502.1};
Cla017939	-1.075	0	0	0	--	--	At5g02020	ref|XP_004137753.1|	--	A0A0A0LD07_CUCSA,SubName: Full=Uncharacterized protein {ECO:0000313|EMBL:KGN58824.1};
Cla017944	-1.648	0	0	0	GO:0016021,integral component of membrane; GO:0005375,copper ion transmembrane transporter activity	--	At2g37920_1	ref|XP_004137921.2|	COPT4_ARATH,RecName: Full=Copper transporter 4; Short=AtCOPT4;	A0A0A0LD01_CUCSA,SubName: Full=Uncharacterized protein {ECO:0000313|EMBL:KGN58819.1};
Cla017965	-1.032	0	0	0	GO:0048046,apoplast; GO:0005507,copper ion binding; GO:0052716,hydroquinone:oxygen oxidoreductase activity; GO:0016491,oxidoreductase activity; GO:0016722,oxidoreductase activity, oxidizing metal ions; GO:0009809,lignin biosynthetic process; GO:0046274,lignin catabolic process; GO:0009834,plant-type secondary cell wall biogenesis	K05909: E1.10.3.2; laccase [EC:1.10.3.2]	At2g38080	ref|XP_004137913.1|	LAC4_ARATH,RecName: Full=Laccase-4; EC=1.10.3.2; AltName: Full=Benzenediol:oxygen oxidoreductase 4; AltName: Full=Diphenol oxidase 4; AltName: Full=Protein IRREGULAR XYLEM 12; AltName: Full=Urishiol oxidase 4; Flags: Precursor;	A0A0A0LFD8_CUCSA,RecName: Full=Laccase {ECO:0000256|RuleBase:RU361119}; EC=1.10.3.2 {ECO:0000256|RuleBase:RU361119}; AltName: Full=Benzenediol:oxygen oxidoreductase {ECO:0000256|RuleBase:RU361119}; AltName: Full=Diphenol oxidase {ECO:0000256|RuleBase:RU361119}; AltName: Full=Urishiol oxidase {ECO:0000256|RuleBase:RU361119};
Cla017966	-1.53	0	0	0	GO:0005634,nucleus; GO:0003677,DNA binding; GO:0048262,determination of dorsal/ventral asymmetry; GO:0009908,flower development; GO:0006355,regulation of transcription, DNA-templated; GO:0006351,transcription, DNA-templated	--	At2g38090	ref|XP_008442463.1|	DIV_ANTMA,RecName: Full=Transcription factor DIVARICATA;	A0A1S3B587_CUCME,SubName: Full=transcription factor DIVARICATA-like {ECO:0000313|RefSeq:XP_008442463.1};
Cla017999	-1.058	0	0	0	GO:0030246,carbohydrate binding; GO:0005525,GTP binding	--	At2g26820_1	gb|ADN33786.1|	IAN10_ARATH,RecName: Full=Immune-associated nucleotide-binding protein 10 {ECO:0000303|PubMed:17723251}; Short=AtIAN10 {ECO:0000303|PubMed:17723251}; AltName: Full=AIG1-like protein {ECO:0000305}; AltName: Full=Putative protein PHLOEM PROTEIN 2-LIKE A3 {ECO:0000303|PubMed:12529520}; Short=AtPP2-A3 {ECO:0000303|PubMed:12529520};	E5GBE4_CUCME,SubName: Full=Avirulence-responsive protein {ECO:0000313|EMBL:ADN33786.1};
Cla018000	-1.103	0	0	0	GO:0005525,GTP binding	--	At1g33970	ref|XP_004137711.1|	IAN9_ARATH,RecName: Full=Immune-associated nucleotide-binding protein 9 {ECO:0000303|PubMed:17723251}; Short=AtIAN9 {ECO:0000303|PubMed:17723251}; AltName: Full=AIG1-like protein {ECO:0000305};	A0A1S3B549_CUCME,SubName: Full=LOW QUALITY PROTEIN: protein AIG1-like {ECO:0000313|RefSeq:XP_008442404.1};
Cla018001	-1.035	0	0	0	GO:0005525,GTP binding	--	At1g33970	ref|XP_004137709.1|	IAN9_ARATH,RecName: Full=Immune-associated nucleotide-binding protein 9 {ECO:0000303|PubMed:17723251}; Short=AtIAN9 {ECO:0000303|PubMed:17723251}; AltName: Full=AIG1-like protein {ECO:0000305};	A0A0A0L9V0_CUCSA,SubName: Full=Uncharacterized protein {ECO:0000313|EMBL:KGN58745.1};
Cla018026	-1.686	0	0	0	GO:0005634,nucleus; GO:0003700,DNA binding transcription factor activity; GO:0043565,sequence-specific DNA binding; GO:0044212,transcription regulatory region DNA binding; GO:0010120,camalexin biosynthetic process; GO:0070370,cellular heat acclimation; GO:0034605,cellular response to heat; GO:0042742,defense response to bacterium; GO:0050832,defense response to fungus; GO:0010508,positive regulat…	K13424: WRKY33; WRKY transcription factor 33	At2g38470	gb|KGN58716.1|	WRK33_ARATH,RecName: Full=Probable WRKY transcription factor 33; AltName: Full=WRKY DNA-binding protein 33;	A0A0A0LF62_CUCSA,SubName: Full=Uncharacterized protein {ECO:0000313|EMBL:KGN58716.1};
Cla018045	0	0	0	-1.808	GO:0005576,extracellular region; GO:0008289,lipid binding; GO:0006869,lipid transport	--	At5g59320	ref|XP_022982607.1|	NLTP3_VITSX,RecName: Full=Non-specific lipid-transfer protein P3; Short=LTP P3;	A0A1S3B5F4_CUCME,RecName: Full=Non-specific lipid-transfer protein {ECO:0000256|RuleBase:RU000628};
Cla018046	-1.255	0	0	0	GO:0016021,integral component of membrane; GO:0046872,metal ion binding; GO:0061630,ubiquitin protein ligase activity; GO:0043161,proteasome-mediated ubiquitin-dependent protein catabolic process	--	At5g01880	ref|XP_008443568.1|	ATL74_ARATH,RecName: Full=RING-H2 finger protein ATL74; EC=2.3.2.27 {ECO:0000305}; AltName: Full=RING-type E3 ubiquitin transferase ATL74 {ECO:0000305};	A0A1S3B8C4_CUCME,SubName: Full=RING-H2 finger protein ATL74-like {ECO:0000313|RefSeq:XP_008443568.1};
Cla018055	-1.041	0	0	0	GO:0016021,integral component of membrane; GO:0005886,plasma membrane; GO:0005524,ATP binding; GO:0004672,protein kinase activity	--	At3g56370	ref|XP_008442319.1|	IRK_ARATH,RecName: Full=Probable LRR receptor-like serine/threonine-protein kinase IRK {ECO:0000305}; EC=2.7.11.1 {ECO:0000305}; AltName: Full=Inflorescence and root apices receptor-like kinase {ECO:0000303|Ref.1}; Flags: Precursor;	A0A1S3B5E9_CUCME,SubName: Full=probable LRR receptor-like serine/threonine-protein kinase IRK {ECO:0000313|RefSeq:XP_008442319.1};
Cla018059	0	1.889	0	0	GO:0005634,nucleus; GO:0003700,DNA binding transcription factor activity; GO:0043565,sequence-specific DNA binding; GO:0042742,defense response to bacterium; GO:0050832,defense response to fungus; GO:0009864,induced systemic resistance, jasmonic acid mediated signaling pathway; GO:1900056,negative regulation of leaf senescence; GO:0045892,negative regulation of transcription, DNA-templated; GO:00…	--	At3g56400	ref|XP_008442314.1|	WRK70_ARATH,RecName: Full=Probable WRKY transcription factor 70; AltName: Full=WRKY DNA-binding protein 70;	A0A1S3B5E3_CUCME,SubName: Full=probable WRKY transcription factor 70 {ECO:0000313|RefSeq:XP_008442314.1};
Cla018105	-1.782	0	0	0	GO:0016021,integral component of membrane; GO:0009705,plant-type vacuole membrane; GO:0005774,vacuolar membrane; GO:0005773,vacuole; GO:0015369,calcium:proton antiporter activity; GO:0006874,cellular calcium ion homeostasis; GO:0030026,cellular manganese ion homeostasis; GO:0006882,cellular zinc ion homeostasis; GO:0055062,phosphate ion homeostasis; GO:0006793,phosphorus metabolic process; GO:005…	K07300: chaA, CAX; Ca2+:H+ antiporter	At2g38170	ref|NP_001267681.1|	CAX3_ARATH,RecName: Full=Vacuolar cation/proton exchanger 3; AltName: Full=Ca(2+)/H(+) antiporter CAX3; AltName: Full=Ca(2+)/H(+) exchanger 3; AltName: Full=Protein CATION EXCHANGER 3;	J7KJQ3_CUCSA,SubName: Full=Cation exchanger CAX3 {ECO:0000313|EMBL:AFQ99295.1}; SubName: Full=Vacuolar cation/proton exchanger 1a {ECO:0000313|EMBL:KGN54380.1};
Cla018165	-1.243	0	0	0	--	--	At5g02020	ref|XP_008448581.1|	--	A0A1S3BK03_CUCME,SubName: Full=uncharacterized protein LOC103490707 isoform X2 {ECO:0000313|RefSeq:XP_008448581.1};
Cla018174	0	0	0	-3.456	GO:0016021,integral component of membrane; GO:0022857,transmembrane transporter activity; GO:0009860,pollen tube growth	K14638: SLC15A3_4, PHT; solute carrier family 15 (peptide/histidine transporter), member 3/4	At5g28470	ref|XP_004142186.1|	PTR52_ARATH,RecName: Full=Protein NRT1/ PTR FAMILY 2.8; Short=AtNPF2.8;	A0A1S4DX14_CUCME,SubName: Full=protein NRT1/ PTR FAMILY 2.8-like {ECO:0000313|RefSeq:XP_016900519.1};
Cla018189	0	1.828	0	0	--	--	At3g23160	ref|XP_004142198.1|	--	A0A0A0L0Z9_CUCSA,SubName: Full=Uncharacterized protein {ECO:0000313|EMBL:KGN54272.1};
Cla018194	-1.002	0	0	0	--	--	At5g02140	ref|XP_008448111.1|	TLPH_ORYSJ,RecName: Full=Thaumatin-like protein; Flags: Precursor;	A0A1S3BJV0_CUCME,SubName: Full=thaumatin-like protein {ECO:0000313|RefSeq:XP_008448111.1};
Cla018208	0	0	0	-1.587	GO:0005634,nucleus; GO:0005886,plasma membrane; GO:0046872,metal ion binding; GO:0004722,protein serine/threonine phosphatase activity; GO:0048366,leaf development	--	At1g07630	ref|XP_011653635.1|	P2C04_ARATH,RecName: Full=Probable protein phosphatase 2C 4; Short=AtPP2C04; EC=3.1.3.16; AltName: Full=Protein POLTERGEIST-LIKE 5; AltName: Full=Protein phosphatase 2C PLL5; Short=PP2C PLL5;	A0A1S3BI01_CUCME,SubName: Full=probable protein phosphatase 2C 4 {ECO:0000313|RefSeq:XP_008447933.1};
Cla018221	1.007	0	0	0	GO:0005524,ATP binding	K03283: HSPA1s; heat shock 70kDa protein 1/2/6/8	At3g12580	gb|OWM87513.1|	HSP72_SOLLC,RecName: Full=Heat shock cognate 70 kDa protein 2;	A0A218XRE2_PUNGR,SubName: Full=Uncharacterized protein {ECO:0000313|EMBL:OWM87513.1};
Cla018222	0	0	0	-1.024	--	--	At2g28780	ref|XP_008447690.2|	--	A0A1S3BHE3_CUCME,SubName: Full=uncharacterized protein LOC103490100 {ECO:0000313|RefSeq:XP_008447690.2};
Cla018242	0	0	0	1.186	GO:0005737,cytoplasm; GO:0046872,metal ion binding; GO:0030001,metal ion transport	--	At3g53530	ref|XP_008447442.1|	NAKR3_ARATH,RecName: Full=Protein SODIUM POTASSIUM ROOT DEFECTIVE 3 {ECO:0000303|PubMed:21193571}; Short=NaKR3 {ECO:0000303|PubMed:21193571}; AltName: Full=Heavy metal-associated plant protein 4 {ECO:0000303|PubMed:23368984}; Short=AtHPP04 {ECO:0000303|PubMed:23368984};	A0A1S3BIC7_CUCME,SubName: Full=uncharacterized protein LOC103489885 {ECO:0000313|RefSeq:XP_008447442.1};
Cla018246	3.412	0	0	0	GO:0005886,plasma membrane; GO:0009506,plasmodesma	--	At2g39370	gb|KGN54211.1|	MAKR4_ARATH,RecName: Full=Probable membrane-associated kinase regulator 4;	A0A0A0L234_CUCSA,SubName: Full=Uncharacterized protein {ECO:0000313|EMBL:KGN54211.1};
Cla018268	1.05	0	0	0	GO:0005634,nucleus; GO:0003677,DNA binding; GO:0003700,DNA binding transcription factor activity; GO:0030154,cell differentiation; GO:0009908,flower development; GO:0010073,meristem maintenance; GO:0048481,plant ovule development; GO:0048316,seed development; GO:0010093,specification of floral organ identity; GO:0006351,transcription, DNA-templated	K09284: AP2; AP2-like factor, euAP2 lineage	At2g28550	ref|XP_004142222.1|	AP2_ARATH,RecName: Full=Floral homeotic protein APETALA 2 {ECO:0000303|PubMed:7919989};	A0A0A0L210_CUCSA,SubName: Full=Uncharacterized protein {ECO:0000313|EMBL:KGN54186.1};
Cla018277	0	0	0	1.422	GO:0005634,nucleus; GO:0003677,DNA binding; GO:0003700,DNA binding transcription factor activity; GO:0046872,metal ion binding; GO:0006355,regulation of transcription, DNA-templated; GO:0006351,transcription, DNA-templated	--	At3g45260	ref|XP_004143353.2|	IDD9_ARATH,RecName: Full=Protein indeterminate-domain 9 {ECO:0000303|PubMed:16784536}; AltName: Full=ID1-like zinc finger protein 1 {ECO:0000303|Ref.1};	A0A0A0KIB8_CUCSA,SubName: Full=Uncharacterized protein {ECO:0000313|EMBL:KGN48137.1};
Cla018280	-1.268	0	0	0	--	--	--	ref|XP_011657647.1|	--	A0A0A0KEM7_CUCSA,SubName: Full=Uncharacterized protein {ECO:0000313|EMBL:KGN48140.1};
Cla018285	2.249	0	0	0	GO:0009507,chloroplast; GO:0005887,integral component of plasma membrane; GO:0005886,plasma membrane; GO:0009506,plasmodesma; GO:0003729,mRNA binding; GO:0015250,water channel activity; GO:0034220,ion transmembrane transport; GO:0009737,response to abscisic acid; GO:0009414,response to water deprivation; GO:0006833,water transport	K09872: PIP; aquaporin PIP	At2g37170	ref|NP_001274397.1|	PIP22_ARATH,RecName: Full=Aquaporin PIP2-2; AltName: Full=Plasma membrane intrinsic protein 2-2; Short=AtPIP2;2; AltName: Full=Plasma membrane intrinsic protein 2b; Short=PIP2b; AltName: Full=TMP2b;	V5RE85_CUCSA,SubName: Full=Aquaporin {ECO:0000313|EMBL:KGN48147.1}; SubName: Full=Plasma intrinsic protein 2-2 {ECO:0000313|EMBL:AHB33478.1};
Cla018286	2.189	0	0	-2.049	GO:0009507,chloroplast; GO:0005887,integral component of plasma membrane; GO:0005886,plasma membrane; GO:0009506,plasmodesma; GO:0003729,mRNA binding; GO:0015250,water channel activity; GO:0034220,ion transmembrane transport; GO:0009737,response to abscisic acid; GO:0009414,response to water deprivation; GO:0006833,water transport	K09872: PIP; aquaporin PIP	At2g37170	ref|NP_001274386.1|	PIP22_ARATH,RecName: Full=Aquaporin PIP2-2; AltName: Full=Plasma membrane intrinsic protein 2-2; Short=AtPIP2;2; AltName: Full=Plasma membrane intrinsic protein 2b; Short=PIP2b; AltName: Full=TMP2b;	V5RDL5_CUCSA,SubName: Full=Plasma intrinsic protein 2-1 {ECO:0000313|EMBL:AHB33477.1};
Cla018287	2.349	0	0	0	GO:0009507,chloroplast; GO:0005887,integral component of plasma membrane; GO:0005886,plasma membrane; GO:0009506,plasmodesma; GO:0003729,mRNA binding; GO:0015250,water channel activity; GO:0034220,ion transmembrane transport; GO:0009737,response to abscisic acid; GO:0009414,response to water deprivation; GO:0006833,water transport	K09872: PIP; aquaporin PIP	At2g37170	ref|XP_022978378.1|	PIP22_ARATH,RecName: Full=Aquaporin PIP2-2; AltName: Full=Plasma membrane intrinsic protein 2-2; Short=AtPIP2;2; AltName: Full=Plasma membrane intrinsic protein 2b; Short=PIP2b; AltName: Full=TMP2b;	V5RDW7_CUCSA,SubName: Full=Plasma intrinsic protein 2-3 {ECO:0000313|EMBL:AHB33479.1};
Cla018297	0	0	0	-1.871	GO:0005737,cytoplasm; GO:0045548,phenylalanine ammonia-lyase activity; GO:0009800,cinnamic acid biosynthetic process; GO:0006559,L-phenylalanine catabolic process	K10775: PAL; phenylalanine ammonia-lyase [EC:4.3.1.24]	At2g37040	ref|XP_004143255.1|	PALY_STYHU,RecName: Full=Phenylalanine ammonia-lyase; EC=4.3.1.24;	A0A0A0KEP3_CUCSA,RecName: Full=Phenylalanine ammonia-lyase {ECO:0000256|RuleBase:RU003955}; EC=4.3.1.24 {ECO:0000256|RuleBase:RU003955};
Cla018311	1.245	0	0	0	--	--	At5g03330	ref|XP_016902883.1|	--	A0A1S4E3S8_CUCME,SubName: Full=RNA polymerase sigma factor sigF, chloroplastic isoform X1 {ECO:0000313|RefSeq:XP_016902883.1, ECO:0000313|RefSeq:XP_016902884.1};
Cla018312	1.723	0	0	0	GO:0005634,nucleus; GO:0003677,DNA binding; GO:0003700,DNA binding transcription factor activity; GO:0007623,circadian rhythm; GO:0006355,regulation of transcription, DNA-templated; GO:0006351,transcription, DNA-templated	--	At2g37000	gb|KGN48179.1|	TCP11_ARATH,RecName: Full=Transcription factor TCP11;	A0A0A0KH86_CUCSA,SubName: Full=Uncharacterized protein {ECO:0000313|EMBL:KGN48179.1};
Cla018328	-2.016	0	0	0	GO:0009570,chloroplast stroma; GO:0004089,carbonate dehydratase activity; GO:0008270,zinc ion binding; GO:0006730,one-carbon metabolic process	K01674: cah; carbonic anhydrase [EC:4.2.1.1]	At1g08080	ref|XP_008462491.1|	ATCA7_ARATH,RecName: Full=Alpha carbonic anhydrase 7; Short=AtaCA7; Short=AtalphaCA7; EC=4.2.1.1; AltName: Full=Alpha carbonate dehydratase 7; Flags: Precursor;	A0A1S3CIK8_CUCME,SubName: Full=alpha carbonic anhydrase 7-like {ECO:0000313|RefSeq:XP_008462491.1};
Cla018337	0	-2.508	0	0	--	--	At3g53180	ref|XP_008462507.1|	--	A0A1S3CIM4_CUCME,SubName: Full=type-1 glutamine synthetase 1-like {ECO:0000313|RefSeq:XP_008462507.1};
Cla018338	-1.191	-3.858	0	0	--	K01915: glnA, GLUL; glutamine synthetase [EC:6.3.1.2]	At3g53180	ref|XP_011657676.1|	--	A0A0A0KES4_CUCSA,SubName: Full=Uncharacterized protein {ECO:0000313|EMBL:KGN48205.1};
Cla018357	0	0	1.223	0	GO:0016021,integral component of membrane	--	At2g25740_1	ref|XP_022977679.1|	TAUE4_ARATH,RecName: Full=Sulfite exporter TauE/SafE family protein 4 {ECO:0000312|EMBL:AEC09275.1};	A0A1S3CHF6_CUCME,SubName: Full=uncharacterized protein LOC103500970 {ECO:0000313|RefSeq:XP_008462667.1};
Cla018369	0	0	0	-1.169	--	--	--	ref|XP_004143374.1|	--	A0A0A0KHE4_CUCSA,SubName: Full=Uncharacterized protein {ECO:0000313|EMBL:KGN48234.1};
Cla018373	0	0	0	-1.098	--	--	At5g03670	ref|XP_008462543.1|	--	A0A1S3CHP7_CUCME,SubName: Full=uncharacterized protein LOC103500875 {ECO:0000313|RefSeq:XP_008462543.1};
Cla018397	0	0	-2.085	0	GO:0005634,nucleus; GO:0080167,response to karrikin	--	At3g52740	ref|XP_023518112.1|	BIC1_ARATH,RecName: Full=Protein BIC1 {ECO:0000303|PubMed:27846570}; AltName: Full=BLUE-LIGHT INHIBITOR OF CRYPTOCHROMES 1 {ECO:0000303|PubMed:27846570};	A0A1R3II58_COCAP,SubName: Full=Uncharacterized protein {ECO:0000313|EMBL:OMO82243.1};
Cla018408	0	0	0	-2.894	--	--	--	ref|XP_008462584.1|	--	A0A1S3CH91_CUCME,SubName: Full=uncharacterized protein LOC103500909 {ECO:0000313|RefSeq:XP_008462584.1};
Cla018420	-1.094	0	0	0	GO:0004869,cysteine-type endopeptidase inhibitor activity	--	At5g47550	ref|XP_006431771.1|	CYTM_SOLTU,RecName: Full=Multicystatin; Short=MC;	V4T622_9ROSI,RecName: Full=Cysteine proteinase inhibitor {ECO:0000256|RuleBase:RU362130};
Cla018475	-1.316	0	0	0	--	--	At1g73750	ref|XP_004137487.1|	--	A0A0A0LVT9_CUCSA,SubName: Full=Uncharacterized protein {ECO:0000313|EMBL:KGN64151.1};
Cla018480	-1.316	0	0	0	GO:0008289,lipid binding; GO:0006869,lipid transport	--	At3g18280	ref|XP_004137484.1|	NLTP_VIGUN,RecName: Full=Probable non-specific lipid-transfer protein AKCS9; Short=LTP; Flags: Precursor;	A0A0A0LVT5_CUCSA,SubName: Full=Uncharacterized protein {ECO:0000313|EMBL:KGN64146.1};
Cla018492	-1.968	0	0	0	GO:0005634,nucleus; GO:0005516,calmodulin binding; GO:0003677,DNA binding; GO:0006355,regulation of transcription, DNA-templated; GO:0006950,response to stress; GO:0006351,transcription, DNA-templated	--	At5g57580	ref|XP_008459337.1|	CB60B_ARATH,RecName: Full=Calmodulin-binding protein 60 B {ECO:0000303|PubMed:11782485};	A0A1S3C9X0_CUCME,SubName: Full=protein SAR DEFICIENT 1 {ECO:0000313|RefSeq:XP_008459337.1};
Cla018545	0	0	0	-2.283	GO:0005634,nucleus; GO:0003700,DNA binding transcription factor activity; GO:0046983,protein dimerization activity; GO:0000977,RNA polymerase II regulatory region sequence-specific DNA binding; GO:0045944,positive regulation of transcription by RNA polymerase II; GO:0006351,transcription, DNA-templated	K09264: K09264; MADS-box transcription factor, plant	At3g02310	ref|XP_011650324.1|	CMB1_DIACA,RecName: Full=MADS-box protein CMB1;	A0A1S3BWT5_CUCME,SubName: Full=MADS-box protein CMB1-like isoform X1 {ECO:0000313|RefSeq:XP_008453343.1};
Cla018569	0	0	0	1.216	--	--	--	gb|PLY71578.1|	--	A0A1R3L1H2_9ROSI,SubName: Full=Uncharacterized protein {ECO:0000313|EMBL:OMP13171.1};
Cla018600	-1.864	0	0	0	GO:0009535,chloroplast thylakoid membrane; GO:0016021,integral component of membrane; GO:0009522,photosystem I; GO:0009523,photosystem II; GO:0016168,chlorophyll binding; GO:0046872,metal ion binding; GO:0009765,photosynthesis, light harvesting; GO:0018298,protein-chromophore linkage	K08910: LHCA4; light-harvesting complex I chlorophyll a/b binding protein 4	At3g47470	ref|XP_004137413.1|	CB24_PEA,RecName: Full=Chlorophyll a-b binding protein P4, chloroplastic; AltName: Full=LHCI type III CAB-P4; Flags: Precursor;	A0A0A0LTE5_CUCSA,RecName: Full=Chlorophyll a-b binding protein, chloroplastic {ECO:0000256|RuleBase:RU363080};
Cla018630	-1.33	0	0	0	GO:0005737,cytoplasm; GO:0005634,nucleus; GO:0019005,SCF ubiquitin ligase complex; GO:0005516,calmodulin binding; GO:0004402,histone acetyltransferase activity; GO:0003712,transcription cofactor activity; GO:0031625,ubiquitin protein ligase binding; GO:0008270,zinc ion binding; GO:0009553,embryo sac development; GO:0009555,pollen development; GO:0043161,proteasome-mediated ubiquitin-dependent pro…	--	At5g63160	ref|XP_008439713.1|	BT1_ARATH,RecName: Full=BTB/POZ and TAZ domain-containing protein 1; AltName: Full=BTB and TAZ domain protein 1;	A0A1S3AZ02_CUCME,SubName: Full=BTB/POZ and TAZ domain-containing protein 1-like {ECO:0000313|RefSeq:XP_008439713.1};
Cla018637	-1.1	0	0	0	GO:0005618,cell wall; GO:0005576,extracellular region; GO:0016157,sucrose synthase activity; GO:0080165,callose deposition in phloem sieve plate; GO:0005985,sucrose metabolic process	K00695: E2.4.1.13; sucrose synthase [EC:2.4.1.13]	At1g73370	dbj|GAY64714.1|	SUS6_ARATH,RecName: Full=Sucrose synthase 6; Short=AtSUS6; EC=2.4.1.13; AltName: Full=Sucrose-UDP glucosyltransferase 6;	A0A2H5QJC1_CITUN,SubName: Full=Uncharacterized protein {ECO:0000313|EMBL:GAY64714.1};
Cla018648	-1.119	0	0	0	GO:0005737,cytoplasm; GO:0043621,protein self-association; GO:0009408,response to heat; GO:0006979,response to oxidative stress	--	At2g27140	ref|XP_008465577.1|	HS178_ARATH,RecName: Full=17.8 kDa class I heat shock protein; AltName: Full=17.8 kDa heat shock protein; Short=AtHsp17.8;	A0A1S3CP71_CUCME,SubName: Full=16.9 kDa class I heat shock protein 1 {ECO:0000313|RefSeq:XP_008465577.1};
Cla018684	-1.145	0	0	0	--	--	At5g11090	ref|XP_023515429.1|	--	A0A1S3B8Q0_CUCME,SubName: Full=uncharacterized protein LOC103487396 {ECO:0000313|RefSeq:XP_008443918.1};
[truncated: 308 more rows]
