# Supplementary material for: Comparative analysis of primary metabolites and transcriptome changes between ungrafted and pumpkin-grafted watermelon during fruit development
Source: PeerJ. 2020 Jan 6;8:e8259. doi: 10.7717/peerj.8259 (PMC6951286; doi:10.7717/peerj.8259)
Supplement: Supplemental Information 11 [file peerj-08-8259-s011.xlsx]

## Sheet: TableS9
Table S9: Go Classification of all sample comparisons
Ontology	ID	Description	GeneRatio	BgRatio	pvalue	p.adjust	qvalue	geneID
Cellular component	GO:0005887	integral component of plasma membrane	27/737	152/11699	8.17957e-07	0.000139053	0.000136039	Cla001315/Cla002640/Cla004468/Cla004902/Cla004909/Cla004962/Cla005203/Cla007644/Cla008875/Cla011338/Cla011339/Cla011593/Cla013865/Cla014031/Cla014491/Cla015428/Cla015493/Cla015682/Cla016880/Cla017331/Cla017821/Cla017861/Cla018285/Cla018286/Cla018287/Cla019812/Cla021597
	GO:0031226	intrinsic component of plasma membrane	37/737	276/11699	1.01804e-05	0.000865336	0.000846583	Cla000305/Cla001315/Cla002640/Cla004197/Cla004468/Cla004902/Cla004909/Cla004962/Cla005203/Cla006269/Cla007644/Cla008329/Cla008396/Cla008875/Cla009776/Cla011338/Cla011339/Cla011593/Cla013865/Cla014031/Cla014491/Cla015428/Cla015493/Cla015655/Cla015682/Cla015694/Cla016880/Cla017331/Cla017638/Cla017821/Cla017861/Cla018285/Cla018286/Cla018287/Cla019538/Cla019812/Cla021597
	GO:0009521	photosystem	14/737	61/11699	1.92593e-05	0.00109136	0.00106771	Cla000152/Cla004483/Cla005429/Cla006740/Cla007871/Cla008554/Cla008859/Cla010005/Cla012368/Cla012670/Cla017325/Cla018600/Cla019423/Cla022963
	GO:0044459	plasma membrane part	43/737	372/11699	7.89962e-05	0.00289815	0.00283534	Cla000305/Cla001315/Cla002640/Cla004197/Cla004468/Cla004767/Cla004768/Cla004771/Cla004902/Cla004909/Cla004962/Cla005203/Cla006269/Cla007644/Cla008329/Cla008396/Cla008875/Cla009776/Cla011338/Cla011339/Cla011593/Cla013865/Cla014031/Cla014491/Cla015428/Cla015493/Cla015655/Cla015682/Cla015694/Cla016880/Cla017247/Cla017331/Cla017638/Cla017821/Cla017861/Cla018285/Cla018286/Cla018287/Cla018715/Cla018924…
	GO:0009522	photosystem I	9/737	31/11699	8.52396e-05	0.00289815	0.00283534	Cla000152/Cla004483/Cla006740/Cla007871/Cla012368/Cla012670/Cla017325/Cla018600/Cla022963
	GO:0005618	cell wall	52/737	500/11699	0.000230129	0.00558885	0.00546773	Cla000585/Cla000802/Cla001439/Cla001732/Cla001988/Cla002485/Cla002570/Cla003829/Cla004677/Cla004683/Cla004896/Cla005065/Cla005384/Cla005402/Cla006220/Cla006356/Cla007693/Cla007856/Cla008255/Cla008967/Cla009305/Cla009640/Cla009776/Cla009848/Cla009870/Cla010196/Cla010816/Cla010821/Cla011256/Cla011585/Cla012240/Cla012478/Cla013995/Cla014254/Cla014562/Cla015033/Cla015102/Cla015574/Cla015774/Cla017329…
	GO:0030312	external encapsulating structure	52/737	500/11699	0.000230129	0.00558885	0.00546773	Cla000585/Cla000802/Cla001439/Cla001732/Cla001988/Cla002485/Cla002570/Cla003829/Cla004677/Cla004683/Cla004896/Cla005065/Cla005384/Cla005402/Cla006220/Cla006356/Cla007693/Cla007856/Cla008255/Cla008967/Cla009305/Cla009640/Cla009776/Cla009848/Cla009870/Cla010196/Cla010816/Cla010821/Cla011256/Cla011585/Cla012240/Cla012478/Cla013995/Cla014254/Cla014562/Cla015033/Cla015102/Cla015574/Cla015774/Cla017329…
	GO:0000325	plant-type vacuole	16/737	114/11699	0.00204173	0.0433867	0.0424464	Cla004220/Cla005226/Cla006064/Cla006510/Cla009645/Cla009818/Cla011593/Cla016551/Cla017419/Cla017626/Cla018105/Cla019917/Cla021688/Cla022451/Cla022916/Cla023344
	GO:0009523	photosystem II	9/737	47/11699	0.00232899	0.043992	0.0430386	Cla005429/Cla008554/Cla008859/Cla010005/Cla012368/Cla017325/Cla018600/Cla019423/Cla022963
	GO:0009705	plant-type vacuole membrane	11/737	83/11699	0.0146655	0.249314	0.243911	Cla005226/Cla006064/Cla006510/Cla009645/Cla011593/Cla017626/Cla018105/Cla019917/Cla021688/Cla022451/Cla022916
	GO:0009535	chloroplast thylakoid membrane	25/737	269/11699	0.0328274	0.465054	0.454976	Cla000152/Cla001482/Cla002942/Cla003933/Cla004483/Cla005404/Cla005429/Cla006144/Cla006740/Cla007419/Cla007741/Cla007871/Cla008554/Cla008859/Cla010005/Cla012368/Cla012670/Cla013329/Cla016321/Cla017325/Cla018600/Cla019380/Cla019423/Cla022678/Cla022963
	GO:0055035	plastid thylakoid membrane	25/737	269/11699	0.0328274	0.465054	0.454976	Cla000152/Cla001482/Cla002942/Cla003933/Cla004483/Cla005404/Cla005429/Cla006144/Cla006740/Cla007419/Cla007741/Cla007871/Cla008554/Cla008859/Cla010005/Cla012368/Cla012670/Cla013329/Cla016321/Cla017325/Cla018600/Cla019380/Cla019423/Cla022678/Cla022963
Molecular function	GO:0046906	tetrapyrrole binding	42/759	294/11110	3.79601e-06	0.00108726	0.000945755	Cla000225/Cla000228/Cla001235/Cla001847/Cla003190/Cla003191/Cla003194/Cla003196/Cla004483/Cla005457/Cla006220/Cla006356/Cla006580/Cla007077/Cla007078/Cla008498/Cla009766/Cla011547/Cla012240/Cla012368/Cla012528/Cla012570/Cla014179/Cla015970/Cla017325/Cla017434/Cla017739/Cla017829/Cla018600/Cla019064/Cla020313/Cla020314/Cla020521/Cla020622/Cla020673/Cla020717/Cla020726/Cla021932/Cla022033/Cla022610…
	GO:0022804	active transmembrane transporter activity	56/759	442/11110	4.5492e-06	0.00108726	0.000945755	Cla001748/Cla002558/Cla003275/Cla004162/Cla004163/Cla004220/Cla004962/Cla006209/Cla006510/Cla006527/Cla007820/Cla008735/Cla008875/Cla009733/Cla009818/Cla010534/Cla011528/Cla011629/Cla011631/Cla012250/Cla013360/Cla013912/Cla014031/Cla014491/Cla015428/Cla015493/Cla015682/Cla016406/Cla016880/Cla017331/Cla017419/Cla017592/Cla017712/Cla018105/Cla018702/Cla018885/Cla018950/Cla019134/Cla019380/Cla019435…
	GO:0020037	heme binding	37/759	266/11110	2.60684e-05	0.0039938	0.00347402	Cla000225/Cla000228/Cla001235/Cla001847/Cla003190/Cla003191/Cla003194/Cla003196/Cla005457/Cla006220/Cla006356/Cla006580/Cla007077/Cla007078/Cla008498/Cla009766/Cla011547/Cla012240/Cla012528/Cla012570/Cla014179/Cla015970/Cla017434/Cla017739/Cla017829/Cla019064/Cla020313/Cla020314/Cla020521/Cla020622/Cla020673/Cla020717/Cla020726/Cla021932/Cla022033/Cla022610/Cla023145
	GO:0015291	secondary active transmembrane transporter activity	37/759	269/11110	3.34209e-05	0.0039938	0.00347402	Cla001748/Cla002558/Cla003275/Cla004162/Cla004163/Cla006209/Cla006510/Cla006527/Cla008735/Cla008875/Cla011528/Cla011629/Cla011631/Cla012250/Cla013912/Cla014491/Cla015428/Cla016880/Cla017331/Cla018105/Cla018702/Cla018885/Cla018950/Cla019134/Cla019435/Cla019454/Cla019564/Cla019566/Cla020741/Cla021597/Cla021643/Cla021693/Cla022122/Cla022847/Cla022916/Cla023090/Cla023344
	GO:0005509	calcium ion binding	27/759	175/11110	5.34162e-05	0.00510659	0.00444198	Cla000765/Cla001741/Cla005258/Cla005429/Cla006701/Cla006954/Cla007536/Cla010322/Cla010842/Cla011740/Cla012617/Cla013273/Cla013661/Cla013901/Cla016954/Cla017151/Cla018929/Cla019269/Cla019423/Cla020184/Cla020682/Cla020738/Cla021803/Cla022563/Cla022566/Cla022567/Cla023344
	GO:0046527	glucosyltransferase activity	29/759	199/11110	8.28351e-05	0.0065992	0.00574033	Cla001732/Cla004767/Cla004768/Cla004771/Cla006361/Cla010447/Cla012198/Cla012820/Cla012972/Cla013387/Cla014096/Cla014189/Cla016027/Cla016029/Cla016053/Cla016524/Cla017383/Cla017769/Cla017773/Cla018637/Cla018813/Cla018814/Cla018816/Cla020245/Cla020248/Cla021172/Cla021173/Cla023018/Cla023274
	GO:0035251	UDP-glucosyltransferase activity	25/759	168/11110	0.000179982	0.0121224	0.0105447	Cla004767/Cla004768/Cla004771/Cla006361/Cla010447/Cla012198/Cla012820/Cla012972/Cla013387/Cla014096/Cla014189/Cla016027/Cla016029/Cla016053/Cla016524/Cla017383/Cla017769/Cla017773/Cla018637/Cla020245/Cla020248/Cla021172/Cla021173/Cla023018/Cla023274
	GO:0016705	oxidoreductase activity, acting on paired donors, with incorporation or reduction of molecular oxygen	35/759	272/11110	0.000208548	0.0121224	0.0105447	Cla000045/Cla000225/Cla000228/Cla000480/Cla001235/Cla005397/Cla005457/Cla007077/Cla007078/Cla008498/Cla009766/Cla009774/Cla010665/Cla011132/Cla011547/Cla012528/Cla012570/Cla013627/Cla013862/Cla014179/Cla015970/Cla017416/Cla017434/Cla017739/Cla019064/Cla019586/Cla020313/Cla020314/Cla020622/Cla020673/Cla020690/Cla020717/Cla020726/Cla022033/Cla022610
	GO:0015293	symporter activity	21/759	132/11110	0.000228246	0.0121224	0.0105447	Cla004162/Cla004163/Cla006510/Cla006527/Cla008875/Cla011629/Cla011631/Cla012250/Cla013912/Cla014491/Cla015428/Cla016880/Cla018702/Cla019134/Cla019454/Cla019564/Cla019566/Cla021597/Cla021643/Cla021693/Cla023090
	GO:0004089	carbonate dehydratase activity	5/759	11/11110	0.00047953	0.0229216	0.0199384	Cla010086/Cla017687/Cla017784/Cla018328/Cla022161
	GO:0005506	iron ion binding	30/759	232/11110	0.000532607	0.0231442	0.020132	Cla000045/Cla000225/Cla000228/Cla001235/Cla005283/Cla005457/Cla007077/Cla007078/Cla008498/Cla009766/Cla011244/Cla011547/Cla012528/Cla012570/Cla013627/Cla014179/Cla015970/Cla017434/Cla017739/Cla019064/Cla020313/Cla020314/Cla020622/Cla020673/Cla020717/Cla020726/Cla021361/Cla021362/Cla022033/Cla022610
	GO:0016758	transferase activity, transferring hexosyl groups	41/759	355/11110	0.000628154	0.0250215	0.021765	Cla001732/Cla002659/Cla004767/Cla004768/Cla004771/Cla006361/Cla006647/Cla006653/Cla006654/Cla006655/Cla008705/Cla010447/Cla010955/Cla012198/Cla012820/Cla012972/Cla013387/Cla014096/Cla014189/Cla016027/Cla016029/Cla016053/Cla016524/Cla016674/Cla017383/Cla017769/Cla017773/Cla018637/Cla018802/Cla018813/Cla018814/Cla018816/Cla020245/Cla020248/Cla020503/Cla021172/Cla021173/Cla021219/Cla023018/Cla023274…
	GO:0004497	monooxygenase activity	28/759	218/11110	0.000896285	0.0329557	0.0286666	Cla000225/Cla000228/Cla000480/Cla001235/Cla005457/Cla007077/Cla007078/Cla008498/Cla009766/Cla010665/Cla011132/Cla011547/Cla012528/Cla012570/Cla014179/Cla015970/Cla017434/Cla017739/Cla019064/Cla020313/Cla020314/Cla020400/Cla020622/Cla020673/Cla020717/Cla020726/Cla022033/Cla022610
	GO:0019203	carbohydrate phosphatase activity	6/759	20/11110	0.00168473	0.0554905	0.0482685	Cla006270/Cla006998/Cla014155/Cla014481/Cla017093/Cla022086
	GO:0015171	amino acid transmembrane transporter activity	12/759	67/11110	0.00174133	0.0554905	0.0482685	Cla002877/Cla006527/Cla011629/Cla011631/Cla013912/Cla013951/Cla015439/Cla017006/Cla019526/Cla020511/Cla020512/Cla023090
	GO:0051119	sugar transmembrane transporter activity	11/759	60/11110	0.00220497	0.0658735	0.0573002	Cla002640/Cla004162/Cla004163/Cla004909/Cla005203/Cla013865/Cla018702/Cla019564/Cla019566/Cla021643/Cla021693
	GO:0008194	UDP-glycosyltransferase activity	28/759	237/11110	0.00314361	0.0816074	0.0709864	Cla004767/Cla004768/Cla004771/Cla006361/Cla008705/Cla010447/Cla010955/Cla012198/Cla012820/Cla012972/Cla013387/Cla014096/Cla014189/Cla016027/Cla016029/Cla016053/Cla016524/Cla016674/Cla017383/Cla017769/Cla017773/Cla018637/Cla020245/Cla020248/Cla021172/Cla021173/Cla023018/Cla023274
	GO:0046873	metal ion transmembrane transporter activity	22/759	173/11110	0.00345566	0.0816074	0.0709864	Cla003275/Cla003299/Cla008202/Cla008203/Cla008212/Cla008732/Cla010394/Cla013822/Cla014031/Cla015493/Cla015682/Cla015739/Cla017944/Cla018105/Cla019339/Cla019812/Cla020741/Cla022678/Cla022799/Cla022916/Cla023269/Cla023344
	GO:0004857	enzyme inhibitor activity	16/759	111/11110	0.00347573	0.0816074	0.0709864	Cla000817/Cla001439/Cla002570/Cla003829/Cla004896/Cla006008/Cla007004/Cla008967/Cla011550/Cla011551/Cla012895/Cla015102/Cla018420/Cla019868/Cla021560/Cla022558
	GO:0022890	inorganic cation transmembrane transporter activity	34/759	307/11110	0.00352551	0.0816074	0.0709864	Cla001748/Cla003275/Cla003299/Cla004162/Cla004163/Cla006510/Cla008202/Cla008203/Cla008212/Cla008732/Cla010394/Cla013822/Cla014031/Cla015493/Cla015682/Cla015739/Cla017944/Cla018105/Cla018702/Cla019134/Cla019339/Cla019380/Cla019564/Cla019566/Cla019812/Cla020741/Cla021643/Cla021693/Cla022451/Cla022678/Cla022799/Cla022916/Cla023269/Cla023344
	GO:0008509	anion transmembrane transporter activity	25/759	206/11110	0.00358526	0.0816074	0.0709864	Cla002877/Cla004962/Cla006064/Cla006510/Cla006527/Cla008735/Cla011629/Cla011631/Cla013912/Cla013951/Cla014491/Cla015428/Cla015439/Cla016880/Cla017006/Cla017331/Cla017626/Cla017861/Cla019134/Cla019526/Cla020511/Cla020512/Cla021597/Cla022275/Cla023090
	GO:0008324	cation transmembrane transporter activity	36/759	341/11110	0.00593945	0.129048	0.112253	Cla001748/Cla003275/Cla003299/Cla004162/Cla004163/Cla006510/Cla007644/Cla008202/Cla008203/Cla008212/Cla008732/Cla010394/Cla013822/Cla014031/Cla015439/Cla015493/Cla015682/Cla015739/Cla017944/Cla018105/Cla018702/Cla019134/Cla019339/Cla019380/Cla019564/Cla019566/Cla019812/Cla020741/Cla021643/Cla021693/Cla022451/Cla022678/Cla022799/Cla022916/Cla023269/Cla023344
	GO:0015144	carbohydrate transmembrane transporter activity	12/759	78/11110	0.00634651	0.131897	0.114731	Cla002640/Cla004162/Cla004163/Cla004909/Cla005203/Cla006789/Cla013865/Cla018702/Cla019564/Cla019566/Cla021643/Cla021693
	GO:0008271	secondary active sulfate transmembrane transporter activity	4/759	12/11110	0.00686899	0.136807	0.119002	Cla014491/Cla015428/Cla016880/Cla021597
	GO:0046915	transition metal ion transmembrane transporter activity	8/759	44/11110	0.00900852	0.172243	0.149826	Cla003299/Cla008202/Cla008203/Cla013822/Cla017944/Cla022678/Cla022799/Cla023269
	GO:0004866	endopeptidase inhibitor activity	6/759	28/11110	0.0102603	0.175158	0.152362	Cla001439/Cla006008/Cla012895/Cla018420/Cla019868/Cla021560
	GO:0030414	peptidase inhibitor activity	6/759	28/11110	0.0102603	0.175158	0.152362	Cla001439/Cla006008/Cla012895/Cla018420/Cla019868/Cla021560
	GO:0061135	endopeptidase regulator activity	6/759	28/11110	0.0102603	0.175158	0.152362	Cla001439/Cla006008/Cla012895/Cla018420/Cla019868/Cla021560
	GO:0005372	water transmembrane transporter activity	6/759	29/11110	0.0122077	0.182353	0.15862	Cla004962/Cla011593/Cla017821/Cla018285/Cla018286/Cla018287
	GO:0015250	water channel activity	6/759	29/11110	0.0122077	0.182353	0.15862	Cla004962/Cla011593/Cla017821/Cla018285/Cla018286/Cla018287
	GO:0046910	pectinesterase inhibitor activity	6/759	29/11110	0.0122077	0.182353	0.15862	Cla002570/Cla003829/Cla004896/Cla011550/Cla011551/Cla015102
	GO:0061134	peptidase regulator activity	6/759	29/11110	0.0122077	0.182353	0.15862	Cla001439/Cla006008/Cla012895/Cla018420/Cla019868/Cla021560
	GO:0016684	oxidoreductase activity, acting on peroxide as acceptor	13/759	96/11110	0.0133043	0.18556	0.16141	Cla000765/Cla001847/Cla003190/Cla003191/Cla003194/Cla003196/Cla006220/Cla006356/Cla007615/Cla012240/Cla013273/Cla017829/Cla021932
	GO:0016667	oxidoreductase activity, acting on a sulfur group of donors	13/759	97/11110	0.0144368	0.18556	0.16141	Cla002161/Cla002895/Cla006508/Cla007427/Cla010144/Cla014443/Cla014691/Cla019247/Cla019374/Cla019421/Cla020871/Cla021715/Cla022682
	GO:0015295	solute:proton symporter activity	9/759	57/11110	0.0144401	0.18556	0.16141	Cla004162/Cla004163/Cla006510/Cla018702/Cla019134/Cla019564/Cla019566/Cla021643/Cla021693
	GO:0004185	serine-type carboxypeptidase activity	5/759	22/11110	0.0145871	0.18556	0.16141	Cla005094/Cla015033/Cla017301/Cla020029/Cla020575
	GO:0070008	serine-type exopeptidase activity	5/759	22/11110	0.0145871	0.18556	0.16141	Cla005094/Cla015033/Cla017301/Cla020029/Cla020575
	GO:0016757	transferase activity, transferring glycosyl groups	46/759	486/11110	0.0147516	0.18556	0.16141	Cla001732/Cla002659/Cla004767/Cla004768/Cla004771/Cla005641/Cla006361/Cla006647/Cla006653/Cla006654/Cla006655/Cla008705/Cla010447/Cla010955/Cla012198/Cla012820/Cla012972/Cla013387/Cla014096/Cla014189/Cla016027/Cla016029/Cla016053/Cla016524/Cla016674/Cla017247/Cla017383/Cla017769/Cla017773/Cla018637/Cla018802/Cla018813/Cla018814/Cla018816/Cla019181/Cla020245/Cla020248/Cla020503/Cla021172/Cla021173…
	GO:0046983	protein dimerization activity	42/759	437/11110	0.0152075	0.18639	0.162132	Cla001067/Cla001487/Cla002264/Cla002628/Cla002749/Cla004348/Cla005156/Cla005253/Cla006692/Cla006693/Cla007867/Cla008161/Cla008649/Cla008700/Cla009647/Cla009883/Cla010184/Cla010331/Cla010664/Cla010813/Cla010844/Cla012633/Cla013371/Cla013532/Cla014085/Cla014507/Cla015138/Cla015153/Cla017143/Cla017347/Cla017516/Cla017518/Cla018545/Cla018968/Cla019871/Cla019979/Cla020193/Cla021059/Cla022558/Cla022864…
	GO:0015116	sulfate transmembrane transporter activity	4/759	15/11110	0.0160772	0.192123	0.167118	Cla014491/Cla015428/Cla016880/Cla021597
	GO:0008514	organic anion transmembrane transporter activity	17/759	142/11110	0.0166647	0.192456	0.167408	Cla002877/Cla006064/Cla006527/Cla008735/Cla011629/Cla011631/Cla013912/Cla013951/Cla015439/Cla017006/Cla017626/Cla017861/Cla019134/Cla019526/Cla020511/Cla020512/Cla023090
	GO:0016798	hydrolase activity, acting on glycosyl bonds	30/759	293/11110	0.0169104	0.192456	0.167408	Cla000802/Cla001732/Cla001988/Cla002909/Cla004017/Cla005402/Cla007203/Cla007635/Cla007856/Cla009776/Cla009870/Cla011369/Cla011370/Cla011374/Cla011559/Cla012478/Cla014254/Cla014562/Cla014954/Cla015101/Cla015574/Cla016279/Cla017329/Cla017674/Cla018813/Cla018814/Cla018816/Cla019538/Cla021218/Cla022086
	GO:0042626	ATPase activity, coupled to transmembrane movement of substances	18/759	156/11110	0.019832	0.214884	0.186918	Cla004220/Cla007820/Cla009733/Cla009818/Cla010534/Cla013360/Cla014031/Cla015493/Cla015682/Cla016406/Cla017419/Cla017592/Cla017712/Cla019380/Cla019812/Cla022451/Cla022799/Cla022922
	GO:0016641	oxidoreductase activity, acting on the CH-NH2 group of donors, oxygen as acceptor	4/759	16/11110	0.0203022	0.214884	0.186918	Cla011205/Cla014414/Cla016287/Cla016833
	GO:0004553	hydrolase activity, hydrolyzing O-glycosyl compounds	28/759	274/11110	0.0209991	0.214884	0.186918	Cla000802/Cla001732/Cla001988/Cla002909/Cla004017/Cla005402/Cla007635/Cla007856/Cla009776/Cla009870/Cla011369/Cla011370/Cla011374/Cla011559/Cla012478/Cla014254/Cla014562/Cla015101/Cla015574/Cla016279/Cla017329/Cla017674/Cla018813/Cla018814/Cla018816/Cla019538/Cla021218/Cla022086
	GO:0080044	quercetin 7-O-glucosyltransferase activity	8/759	51/11110	0.0213016	0.214884	0.186918	Cla013387/Cla014096/Cla014189/Cla016524/Cla017769/Cla017773/Cla020245/Cla020248
	GO:0030599	pectinesterase activity	7/759	42/11110	0.0223879	0.214884	0.186918	Cla002570/Cla003829/Cla004896/Cla008967/Cla011256/Cla011585/Cla015102
	GO:0045330	aspartyl esterase activity	7/759	42/11110	0.0223879	0.214884	0.186918	Cla002570/Cla003829/Cla004896/Cla008967/Cla011256/Cla011585/Cla015102
	GO:0080043	quercetin 3-O-glucosyltransferase activity	8/759	52/11110	0.0237212	0.214884	0.186918	Cla013387/Cla014096/Cla014189/Cla016524/Cla017769/Cla017773/Cla020245/Cla020248
	GO:0004601	peroxidase activity	12/759	93/11110	0.0240599	0.214884	0.186918	Cla000765/Cla001847/Cla003190/Cla003191/Cla003194/Cla003196/Cla006220/Cla006356/Cla012240/Cla013273/Cla017829/Cla021932
	GO:0005342	organic acid transmembrane transporter activity	14/759	115/11110	0.0247247	0.214884	0.186918	Cla002877/Cla006064/Cla006527/Cla011629/Cla011631/Cla013912/Cla013951/Cla015439/Cla017006/Cla017626/Cla019526/Cla020511/Cla020512/Cla023090
	GO:0046943	carboxylic acid transmembrane transporter activity	14/759	115/11110	0.0247247	0.214884	0.186918	Cla002877/Cla006064/Cla006527/Cla011629/Cla011631/Cla013912/Cla013951/Cla015439/Cla017006/Cla017626/Cla019526/Cla020511/Cla020512/Cla023090
	GO:0005385	zinc ion transmembrane transporter activity	4/759	17/11110	0.0251483	0.214884	0.186918	Cla003299/Cla022678/Cla022799/Cla023269
	GO:0008810	cellulase activity	4/759	17/11110	0.0251483	0.214884	0.186918	Cla011374/Cla012478/Cla015101/Cla016279
	GO:0072509	divalent inorganic cation transmembrane transporter activity	4/759	17/11110	0.0251483	0.214884	0.186918	Cla003299/Cla022678/Cla022799/Cla023269
	GO:0004650	polygalacturonase activity	6/759	34/11110	0.0258987	0.214884	0.186918	Cla000802/Cla001988/Cla005402/Cla009870/Cla017329/Cla021218
	GO:0016709	oxidoreductase activity, acting on paired donors, with incorporation or reduction of molecular oxygen, NAD(P)H as one donor, and incorporation of one atom of oxygen	14/759	116/11110	0.0264234	0.214884	0.186918	Cla000225/Cla000480/Cla005457/Cla007078/Cla010665/Cla011132/Cla011547/Cla012570/Cla019064/Cla020622/Cla020673/Cla020717/Cla020726/Cla022033
	GO:0015294	solute:cation symporter activity	9/759	63/11110	0.0264674	0.214884	0.186918	Cla004162/Cla004163/Cla006510/Cla018702/Cla019134/Cla019564/Cla019566/Cla021643/Cla021693
	GO:0005375	copper ion transmembrane transporter activity	3/759	10/11110	0.0265234	0.214884	0.186918	Cla008202/Cla008203/Cla017944
	GO:0016168	chlorophyll binding	5/759	26/11110	0.0290998	0.218938	0.190444	Cla004483/Cla012368/Cla017325/Cla018600/Cla022963
	GO:0015085	calcium ion transmembrane transporter activity	8/759	54/11110	0.0291259	0.218938	0.190444	Cla014031/Cla015493/Cla015682/Cla015739/Cla018105/Cla019812/Cla020741/Cla023344
	GO:0015399	primary active transmembrane transporter activity	19/759	175/11110	0.0300246	0.218938	0.190444	Cla004220/Cla007820/Cla009733/Cla009818/Cla010534/Cla011629/Cla013360/Cla014031/Cla015493/Cla015682/Cla016406/Cla017419/Cla017592/Cla017712/Cla019380/Cla019812/Cla022451/Cla022799/Cla022922
	GO:0005388	calcium-transporting ATPase activity	4/759	18/11110	0.0306324	0.218938	0.190444	Cla014031/Cla015493/Cla015682/Cla019812
	GO:0008559	xenobiotic transmembrane transporting ATPase activity	4/759	18/11110	0.0306324	0.218938	0.190444	Cla004220/Cla009818/Cla017419/Cla022922
	GO:0042910	xenobiotic transmembrane transporter activity	4/759	18/11110	0.0306324	0.218938	0.190444	Cla004220/Cla009818/Cla017419/Cla022922
	GO:0016835	carbon-oxygen lyase activity	13/759	108/11110	0.032268	0.218938	0.190444	Cla002940/Cla003615/Cla006048/Cla007777/Cla007779/Cla010086/Cla015970/Cla017687/Cla017784/Cla018328/Cla020532/Cla021445/Cla022161
	GO:0043492	ATPase activity, coupled to movement of substances	18/759	165/11110	0.0326771	0.218938	0.190444	Cla004220/Cla007820/Cla009733/Cla009818/Cla010534/Cla013360/Cla014031/Cla015493/Cla015682/Cla016406/Cla017419/Cla017592/Cla017712/Cla019380/Cla019812/Cla022451/Cla022799/Cla022922
	GO:0004180	carboxypeptidase activity	5/759	27/11110	0.0337716	0.218938	0.190444	Cla005094/Cla015033/Cla017301/Cla020029/Cla020575
	GO:0004564	beta-fructofuranosidase activity	3/759	11/11110	0.0346554	0.218938	0.190444	Cla011559/Cla015574/Cla017674
	GO:0004575	sucrose alpha-glucosidase activity	3/759	11/11110	0.0346554	0.218938	0.190444	Cla011559/Cla015574/Cla017674
	GO:0004867	serine-type endopeptidase inhibitor activity	3/759	11/11110	0.0346554	0.218938	0.190444	Cla006008/Cla019868/Cla021560
	GO:0005356	glucose:proton symporter activity	3/759	11/11110	0.0346554	0.218938	0.190444	Cla004162/Cla004163/Cla021643
	GO:0009679	hexose:proton symporter activity	3/759	11/11110	0.0346554	0.218938	0.190444	Cla004162/Cla004163/Cla021643
	GO:0010333	terpene synthase activity	3/759	11/11110	0.0346554	0.218938	0.190444	Cla006048/Cla007777/Cla007779
	GO:0005355	glucose transmembrane transporter activity	7/759	46/11110	0.0351554	0.218938	0.190444	Cla004162/Cla004163/Cla018702/Cla019564/Cla019566/Cla021643/Cla021693
	GO:0015149	hexose transmembrane transporter activity	7/759	46/11110	0.0351554	0.218938	0.190444	Cla004162/Cla004163/Cla018702/Cla019564/Cla019566/Cla021643/Cla021693
	GO:0015077	monovalent inorganic cation transmembrane transporter activity	20/759	190/11110	0.0352683	0.218938	0.190444	Cla001748/Cla003275/Cla004162/Cla004163/Cla006510/Cla008212/Cla008732/Cla010394/Cla018105/Cla018702/Cla019134/Cla019339/Cla019380/Cla019564/Cla019566/Cla021643/Cla021693/Cla022451/Cla022916/Cla023344
	GO:0015145	monosaccharide transmembrane transporter activity	7/759	47/11110	0.0389705	0.238819	0.207738	Cla004162/Cla004163/Cla018702/Cla019564/Cla019566/Cla021643/Cla021693
	GO:0016209	antioxidant activity	15/759	135/11110	0.0420942	0.254697	0.221549	Cla000765/Cla001847/Cla003190/Cla003191/Cla003194/Cla003196/Cla006220/Cla006356/Cla007427/Cla010144/Cla012240/Cla013273/Cla017829/Cla019421/Cla021932
	GO:0016671	oxidoreductase activity, acting on a sulfur group of donors, disulfide as acceptor	5/759	29/11110	0.04444	0.262251	0.228119	Cla010144/Cla014443/Cla019247/Cla019374/Cla019421
	GO:1901682	sulfur compound transmembrane transporter activity	5/759	29/11110	0.04444	0.262251	0.228119	Cla014491/Cla015428/Cla016880/Cla019134/Cla021597
	GO:0015405	P-P-bond-hydrolysis-driven transmembrane transporter activity	18/759	172/11110	0.0462982	0.269885	0.23476	Cla004220/Cla007820/Cla009733/Cla009818/Cla010534/Cla013360/Cla014031/Cla015493/Cla015682/Cla016406/Cla017419/Cla017592/Cla017712/Cla019380/Cla019812/Cla022451/Cla022799/Cla022922
	GO:0016706	oxidoreductase activity, acting on paired donors, with incorporation or reduction of molecular oxygen, 2-oxoglutarate as one donor, and incorporation of one atom each of oxygen into both donors	6/759	39/11110	0.0471992	0.271822	0.236445	Cla000045/Cla005397/Cla009774/Cla010665/Cla013627/Cla019586
	GO:0005351	carbohydrate:proton symporter activity	7/759	50/11110	0.0519998	0.292423	0.254365	Cla004162/Cla004163/Cla018702/Cla019564/Cla019566/Cla021643/Cla021693
	GO:0005402	carbohydrate:cation symporter activity	7/759	50/11110	0.0519998	0.292423	0.254365	Cla004162/Cla004163/Cla018702/Cla019564/Cla019566/Cla021643/Cla021693
	GO:0015297	antiporter activity	14/759	129/11110	0.0569619	0.316602	0.275397	Cla001748/Cla002558/Cla003275/Cla006209/Cla008735/Cla011528/Cla017331/Cla018105/Cla018950/Cla019435/Cla022122/Cla022847/Cla022916/Cla023344
	GO:0031418	L-ascorbic acid binding	4/759	22/11110	0.0590838	0.324622	0.282373	Cla000045/Cla013627/Cla014414/Cla016287
	GO:0015035	protein disulfide oxidoreductase activity	8/759	63/11110	0.0637931	0.346513	0.301415	Cla002161/Cla002895/Cla010144/Cla014691/Cla019421/Cla020871/Cla021715/Cla022682
	GO:0016837	carbon-oxygen lyase activity, acting on polysaccharides	3/759	14/11110	0.0656817	0.348843	0.303442	Cla002940/Cla020532/Cla021445
	GO:0030570	pectate lyase activity	3/759	14/11110	0.0656817	0.348843	0.303442	Cla002940/Cla020532/Cla021445
	GO:0016645	oxidoreductase activity, acting on the CH-NH group of donors	4/759	23/11110	0.0678137	0.356208	0.309849	Cla011126/Cla011205/Cla016474/Cla016833
	GO:0022838	substrate-specific channel activity	12/759	111/11110	0.0758507	0.388788	0.338188	Cla004902/Cla004962/Cla006510/Cla008212/Cla008732/Cla011593/Cla015739/Cla017821/Cla018285/Cla018286/Cla018287/Cla020741
	GO:0016638	oxidoreductase activity, acting on the CH-NH2 group of donors	4/759	24/11110	0.0771694	0.388788	0.338188	Cla011205/Cla014414/Cla016287/Cla016833
	GO:0016838	carbon-oxygen lyase activity, acting on phosphates	3/759	15/11110	0.0780829	0.388788	0.338188	Cla006048/Cla007777/Cla007779
	GO:0031409	pigment binding	3/759	15/11110	0.0780829	0.388788	0.338188	Cla012368/Cla017325/Cla022963
	GO:0090599	alpha-glucosidase activity	3/759	15/11110	0.0780829	0.388788	0.338188	Cla011559/Cla015574/Cla017674
	GO:0015238	drug transmembrane transporter activity	12/759	112/11110	0.0799596	0.394028	0.342746	Cla004220/Cla004962/Cla006209/Cla009818/Cla011528/Cla015439/Cla017419/Cla018950/Cla019435/Cla022122/Cla022847/Cla022922
	GO:0015662	ATPase activity, coupled to transmembrane movement of ions, phosphorylative mechanism	5/759	35/11110	0.0872372	0.425504	0.370126	Cla014031/Cla015493/Cla015682/Cla019812/Cla022799
	GO:0015036	disulfide oxidoreductase activity	9/759	79/11110	0.0888802	0.429139	0.373288	Cla002161/Cla002895/Cla007427/Cla010144/Cla014691/Cla019421/Cla020871/Cla021715/Cla022682
	GO:0015103	inorganic anion transmembrane transporter activity	8/759	68/11110	0.090953	0.432646	0.376338	Cla004962/Cla006510/Cla014491/Cla015428/Cla016880/Cla017331/Cla021597/Cla022275
	GO:0004869	cysteine-type endopeptidase inhibitor activity	3/759	16/11110	0.0914168	0.432646	0.376338	Cla001439/Cla012895/Cla018420
	GO:0030234	enzyme regulator activity	20/759	214/11110	0.0948032	0.444274	0.386453	Cla000817/Cla001439/Cla002570/Cla003829/Cla004896/Cla006008/Cla007004/Cla008967/Cla011550/Cla011551/Cla012895/Cla015102/Cla018420/Cla019272/Cla019380/Cla019868/Cla021560/Cla022168/Cla022558/Cla022736
	GO:0008483	transaminase activity	6/759	47/11110	0.0988576	0.454365	0.39523	Cla006334/Cla012019/Cla013546/Cla015337/Cla023265/Cla023356
	GO:0016769	transferase activity, transferring nitrogenous groups	6/759	47/11110	0.0988576	0.454365	0.39523	Cla006334/Cla012019/Cla013546/Cla015337/Cla023265/Cla023356
	GO:0051213	dioxygenase activity	12/759	117/11110	0.10258	0.466982	0.406205	Cla000045/Cla001290/Cla001298/Cla002942/Cla004982/Cla005397/Cla005404/Cla009774/Cla010665/Cla013627/Cla019586/Cla019904
	GO:0015078	proton transmembrane transporter activity	14/759	142/11110	0.105551	0.467454	0.406616	Cla001748/Cla003275/Cla004162/Cla004163/Cla006510/Cla018105/Cla018702/Cla019134/Cla019380/Cla019564/Cla019566/Cla021643/Cla021693/Cla022451
	GO:0004402	histone acetyltransferase activity	3/759	17/11110	0.105617	0.467454	0.406616	Cla002572/Cla014022/Cla018630
	GO:0061733	peptide-lysine-N-acetyltransferase activity	3/759	17/11110	0.105617	0.467454	0.406616	Cla002572/Cla014022/Cla018630
Biological process	GO:0042737	drug catabolic process	28/703	187/10951	2.22104e-05	0.0307614	0.0295983	Cla001290/Cla001847/Cla002570/Cla002940/Cla003190/Cla003191/Cla003194/Cla003196/Cla003829/Cla004896/Cla004982/Cla005402/Cla006220/Cla006356/Cla008967/Cla010665/Cla011126/Cla011256/Cla011260/Cla011585/Cla012240/Cla013546/Cla015102/Cla017829/Cla018297/Cla020532/Cla021445/Cla021932
	GO:0005984	disaccharide metabolic process	11/703	46/10951	0.000118573	0.0497349	0.0478544	Cla006270/Cla006789/Cla011369/Cla011370/Cla011559/Cla012198/Cla014155/Cla014481/Cla018637/Cla019181/Cla022086
	GO:0055085	transmembrane transport	47/703	422/10951	0.000142112	0.0497349	0.0478544	Cla002558/Cla002877/Cla003275/Cla003299/Cla004162/Cla004163/Cla004220/Cla006209/Cla006510/Cla008735/Cla008875/Cla009619/Cla009818/Cla010795/Cla011528/Cla011593/Cla013360/Cla013822/Cla013912/Cla013951/Cla014031/Cla014491/Cla015714/Cla017006/Cla017419/Cla017821/Cla018285/Cla018286/Cla018287/Cla018702/Cla018885/Cla018950/Cla019380/Cla019435/Cla019564/Cla019566/Cla020511/Cla020512/Cla021053/Cla021643…
	GO:0005991	trehalose metabolic process	7/703	20/10951	0.000161536	0.0497349	0.0478544	Cla006270/Cla011369/Cla011370/Cla014155/Cla014481/Cla019181/Cla022086
	GO:0044262	cellular carbohydrate metabolic process	40/703	344/10951	0.000179548	0.0497349	0.0478544	Cla001732/Cla002166/Cla004767/Cla004768/Cla004771/Cla006270/Cla006789/Cla007008/Cla007635/Cla008705/Cla009165/Cla010447/Cla010816/Cla011244/Cla011369/Cla011370/Cla011374/Cla011477/Cla011559/Cla012198/Cla012478/Cla012820/Cla012972/Cla014155/Cla014161/Cla014190/Cla014481/Cla014489/Cla015101/Cla016279/Cla017093/Cla017383/Cla018637/Cla018813/Cla018814/Cla018816/Cla019181/Cla020445/Cla021436/Cla022086
	GO:0006865	amino acid transport	12/703	58/10951	0.000257588	0.0594599	0.0572117	Cla002877/Cla006527/Cla010795/Cla011629/Cla011631/Cla013912/Cla013951/Cla017006/Cla020511/Cla020512/Cla021053/Cla023090
	GO:0045490	pectin catabolic process	12/703	61/10951	0.000421525	0.0834017	0.0802482	Cla002570/Cla002940/Cla003829/Cla004896/Cla005402/Cla008967/Cla011256/Cla011260/Cla011585/Cla015102/Cla020532/Cla021445
	GO:0000272	polysaccharide catabolic process	19/703	128/10951	0.000503055	0.0870914	0.0837984	Cla002570/Cla002940/Cla003829/Cla004896/Cla005402/Cla006789/Cla007635/Cla008967/Cla011256/Cla011260/Cla011374/Cla011585/Cla012478/Cla015101/Cla015102/Cla016279/Cla017093/Cla020532/Cla021445
	GO:0017001	antibiotic catabolic process	13/703	72/10951	0.000588032	0.0903317	0.0869162	Cla001290/Cla001847/Cla003190/Cla003191/Cla003194/Cla003196/Cla004982/Cla006220/Cla006356/Cla010665/Cla012240/Cla017829/Cla021932
	GO:0042447	hormone catabolic process	6/703	18/10951	0.000652215	0.0903317	0.0869162	Cla001290/Cla004982/Cla010665/Cla011205/Cla014085/Cla016833
	GO:0016052	carbohydrate catabolic process	25/703	197/10951	0.000818649	0.0949035	0.0913151	Cla002570/Cla002940/Cla003829/Cla004896/Cla005402/Cla005489/Cla006789/Cla007635/Cla008967/Cla011244/Cla011256/Cla011260/Cla011369/Cla011370/Cla011374/Cla011585/Cla012478/Cla015101/Cla015102/Cla016279/Cla016609/Cla017093/Cla020457/Cla020532/Cla021445
	GO:0034220	ion transmembrane transport	27/703	221/10951	0.000929912	0.0949035	0.0913151	Cla002877/Cla003275/Cla003299/Cla006510/Cla008735/Cla009619/Cla010795/Cla011593/Cla013822/Cla013912/Cla013951/Cla014031/Cla014491/Cla015714/Cla017006/Cla017821/Cla018285/Cla018286/Cla018287/Cla018885/Cla019380/Cla020511/Cla020512/Cla021053/Cla022451/Cla023090/Cla023269
	GO:0071555	cell wall organization	43/703	410/10951	0.000955924	0.0949035	0.0913151	Cla000585/Cla000802/Cla001732/Cla001812/Cla001988/Cla002570/Cla003829/Cla004767/Cla004768/Cla004771/Cla004896/Cla005402/Cla006197/Cla006220/Cla006356/Cla007455/Cla008705/Cla008967/Cla009776/Cla009870/Cla010196/Cla010447/Cla010816/Cla011248/Cla011256/Cla011374/Cla011477/Cla011554/Cla011585/Cla012478/Cla012820/Cla012972/Cla015101/Cla015102/Cla016279/Cla017329/Cla017383/Cla017829/Cla018813/Cla018814…
	GO:0003333	amino acid transmembrane transport	9/703	41/10951	0.000959314	0.0949035	0.0913151	Cla002877/Cla010795/Cla013912/Cla013951/Cla017006/Cla020511/Cla020512/Cla021053/Cla023090
	GO:0045229	external encapsulating structure organization	44/703	431/10951	0.00144496	0.130994	0.126041	Cla000585/Cla000802/Cla001732/Cla001812/Cla001988/Cla002570/Cla003829/Cla004767/Cla004768/Cla004771/Cla004896/Cla005402/Cla006197/Cla006220/Cla006356/Cla007455/Cla008705/Cla008967/Cla009165/Cla009776/Cla009870/Cla010196/Cla010447/Cla010816/Cla011248/Cla011256/Cla011374/Cla011477/Cla011554/Cla011585/Cla012478/Cla012820/Cla012972/Cla015101/Cla015102/Cla016279/Cla017329/Cla017383/Cla017829/Cla018813…
	GO:0042545	cell wall modification	14/703	89/10951	0.00151329	0.130994	0.126041	Cla000802/Cla001812/Cla002570/Cla003829/Cla004767/Cla004768/Cla004771/Cla004896/Cla006197/Cla008967/Cla011256/Cla011585/Cla015102/Cla017329
	GO:0098656	anion transmembrane transport	15/703	100/10951	0.0017064	0.134171	0.129098	Cla002877/Cla006510/Cla008735/Cla009619/Cla010795/Cla013912/Cla013951/Cla014491/Cla015714/Cla017006/Cla018885/Cla020511/Cla020512/Cla021053/Cla023090
	GO:0015979	photosynthesis	23/703	186/10951	0.0018421	0.134171	0.129098	Cla000152/Cla003933/Cla004483/Cla005429/Cla006740/Cla007150/Cla007741/Cla007871/Cla008554/Cla008859/Cla010005/Cla012368/Cla012670/Cla016088/Cla017325/Cla018600/Cla019380/Cla019423/Cla020400/Cla020608/Cla020690/Cla022963/Cla023399
	GO:0005992	trehalose biosynthetic process	5/703	15/10951	0.00187869	0.134171	0.129098	Cla006270/Cla014155/Cla014481/Cla019181/Cla022086
	GO:0009835	fruit ripening	7/703	29/10951	0.00195923	0.134171	0.129098	Cla000228/Cla001988/Cla006634/Cla010201/Cla012528/Cla014414/Cla016287
	GO:0006820	anion transport	25/703	210/10951	0.00203437	0.134171	0.129098	Cla002877/Cla004962/Cla006510/Cla006527/Cla008580/Cla008735/Cla009619/Cla010795/Cla011629/Cla011631/Cla013912/Cla013951/Cla014491/Cla015714/Cla016406/Cla017006/Cla018885/Cla019134/Cla020350/Cla020511/Cla020512/Cla021053/Cla021597/Cla022275/Cla023090
	GO:0009267	cellular response to starvation	14/703	94/10951	0.00257007	0.161797	0.15568	Cla000310/Cla000753/Cla006686/Cla008875/Cla009619/Cla012239/Cla012617/Cla013371/Cla015138/Cla016674/Cla016705/Cla019943/Cla020350/Cla021436
	GO:0044275	cellular carbohydrate catabolic process	10/703	56/10951	0.0026875	0.161834	0.155715	Cla006789/Cla007635/Cla011244/Cla011369/Cla011370/Cla011374/Cla012478/Cla015101/Cla016279/Cla017093
	GO:0009733	response to auxin	38/703	375/10951	0.00337595	0.194005	0.18667	Cla001741/Cla001812/Cla002572/Cla005258/Cla005970/Cla006646/Cla007389/Cla008029/Cla008736/Cla009130/Cla009633/Cla010534/Cla011740/Cla012315/Cla012544/Cla012570/Cla012686/Cla013110/Cla013463/Cla013979/Cla013990/Cla014022/Cla014193/Cla014274/Cla014894/Cla015414/Cla015857/Cla016169/Cla016621/Cla018630/Cla018814/Cla018924/Cla019943/Cla020420/Cla021338/Cla021733/Cla022922/Cla023102
	GO:0015711	organic anion transport	16/703	118/10951	0.0035019	0.194005	0.18667	Cla002877/Cla006527/Cla008580/Cla008735/Cla010795/Cla011629/Cla011631/Cla013912/Cla013951/Cla016406/Cla017006/Cla019134/Cla020511/Cla020512/Cla021053/Cla023090
	GO:0031669	cellular response to nutrient levels	15/703	108/10951	0.00366851	0.195419	0.18803	Cla000310/Cla000753/Cla004962/Cla006686/Cla008875/Cla009619/Cla012239/Cla012617/Cla013371/Cla015138/Cla016674/Cla016705/Cla019943/Cla020350/Cla021436
	GO:0046351	disaccharide biosynthetic process	6/703	25/10951	0.00423168	0.217069	0.208862	Cla006270/Cla012198/Cla014155/Cla014481/Cla019181/Cla022086
	GO:0055081	anion homeostasis	8/703	42/10951	0.00466288	0.217699	0.209468	Cla002166/Cla002345/Cla005489/Cla007995/Cla009619/Cla013951/Cla018105/Cla018715
	GO:0009311	oligosaccharide metabolic process	11/703	70/10951	0.00472841	0.217699	0.209468	Cla006270/Cla006789/Cla011369/Cla011370/Cla011559/Cla012198/Cla014155/Cla014481/Cla018637/Cla019181/Cla022086
	GO:0008643	carbohydrate transport	15/703	111/10951	0.0047681	0.217699	0.209468	Cla002345/Cla002558/Cla002640/Cla004162/Cla004163/Cla004909/Cla005203/Cla008735/Cla018702/Cla019454/Cla019564/Cla019566/Cla021643/Cla021693/Cla022319
	GO:0042592	homeostatic process	42/703	434/10951	0.00487269	0.217699	0.209468	Cla000765/Cla001748/Cla002161/Cla002166/Cla002345/Cla002632/Cla002895/Cla003275/Cla004162/Cla004163/Cla005457/Cla005489/Cla007389/Cla007419/Cla007427/Cla007706/Cla007995/Cla009619/Cla010144/Cla011415/Cla013822/Cla013951/Cla014443/Cla014691/Cla017264/Cla017331/Cla018105/Cla018715/Cla018924/Cla019374/Cla019421/Cla019788/Cla020451/Cla020673/Cla020703/Cla020871/Cla021715/Cla022451/Cla022682/Cla022799…
	GO:0098661	inorganic anion transmembrane transport	4/703	12/10951	0.00550069	0.238077	0.229075	Cla006510/Cla009619/Cla014491/Cla018885
	GO:0055083	monovalent inorganic anion homeostasis	5/703	19/10951	0.00587181	0.246438	0.23712	Cla002166/Cla002345/Cla009619/Cla018105/Cla018715
	GO:0042743	hydrogen peroxide metabolic process	12/703	84/10951	0.0070994	0.269885	0.25968	Cla000765/Cla001847/Cla003190/Cla003191/Cla003194/Cla003196/Cla006220/Cla006356/Cla012240/Cla012540/Cla017829/Cla021932
	GO:0005976	polysaccharide metabolic process	36/703	367/10951	0.00712888	0.269885	0.25968	Cla001732/Cla002570/Cla002940/Cla003829/Cla004767/Cla004768/Cla004771/Cla004896/Cla005402/Cla006789/Cla007008/Cla007635/Cla008705/Cla008967/Cla009165/Cla010447/Cla010816/Cla011256/Cla011260/Cla011374/Cla011477/Cla011585/Cla012478/Cla012820/Cla012972/Cla015101/Cla015102/Cla016279/Cla017093/Cla017383/Cla018813/Cla018814/Cla018816/Cla020445/Cla020532/Cla021445
	GO:0016036	cellular response to phosphate starvation	8/703	45/10951	0.00718963	0.269885	0.25968	Cla006686/Cla009619/Cla012239/Cla012617/Cla016674/Cla016705/Cla019943/Cla020350
	GO:0042744	hydrogen peroxide catabolic process	10/703	64/10951	0.00720993	0.269885	0.25968	Cla001847/Cla003190/Cla003191/Cla003194/Cla003196/Cla006220/Cla006356/Cla012240/Cla017829/Cla021932
	GO:0071695	anatomical structure maturation	18/703	150/10951	0.00750667	0.273598	0.263253	Cla000228/Cla001988/Cla002640/Cla006197/Cla006634/Cla008212/Cla008907/Cla010201/Cla012528/Cla013228/Cla014414/Cla015138/Cla016287/Cla017036/Cla017037/Cla017821/Cla018715/Cla022922
	GO:0009251	glucan catabolic process	7/703	38/10951	0.00959266	0.340663	0.327782	Cla006789/Cla007635/Cla011374/Cla012478/Cla015101/Cla016279/Cla017093
	GO:0009765	photosynthesis, light harvesting	6/703	30/10951	0.0107984	0.366923	0.353049	Cla000152/Cla007741/Cla012368/Cla017325/Cla018600/Cla022963
	GO:0015849	organic acid transport	13/703	100/10951	0.0113641	0.366923	0.353049	Cla002877/Cla006527/Cla010795/Cla011629/Cla011631/Cla013912/Cla013951/Cla016406/Cla017006/Cla020511/Cla020512/Cla021053/Cla023090
	GO:0046942	carboxylic acid transport	13/703	100/10951	0.0113641	0.366923	0.353049	Cla002877/Cla006527/Cla010795/Cla011629/Cla011631/Cla013912/Cla013951/Cla016406/Cla017006/Cla020511/Cla020512/Cla021053/Cla023090
	GO:0042594	response to starvation	14/703	111/10951	0.0113918	0.366923	0.353049	Cla000310/Cla000753/Cla006686/Cla008875/Cla009619/Cla012239/Cla012617/Cla013371/Cla015138/Cla016674/Cla016705/Cla019943/Cla020350/Cla021436
	GO:0034637	cellular carbohydrate biosynthetic process	21/703	193/10951	0.0122101	0.375303	0.361112	Cla004767/Cla004768/Cla004771/Cla006270/Cla007008/Cla008705/Cla009165/Cla010447/Cla010816/Cla011477/Cla012198/Cla012820/Cla012972/Cla014155/Cla014161/Cla014481/Cla014489/Cla017383/Cla019181/Cla020445/Cla022086
	GO:1901616	organic hydroxy compound catabolic process	6/703	31/10951	0.0126817	0.375303	0.361112	Cla001290/Cla004982/Cla005457/Cla010665/Cla011244/Cla020673
	GO:1903825	organic acid transmembrane transport	9/703	60/10951	0.0136713	0.375303	0.361112	Cla002877/Cla010795/Cla013912/Cla013951/Cla017006/Cla020511/Cla020512/Cla021053/Cla023090
	GO:1905039	carboxylic acid transmembrane transport	9/703	60/10951	0.0136713	0.375303	0.361112	Cla002877/Cla010795/Cla013912/Cla013951/Cla017006/Cla020511/Cla020512/Cla021053/Cla023090
	GO:0006833	water transport	5/703	23/10951	0.0137372	0.375303	0.361112	Cla007455/Cla017592/Cla018285/Cla018286/Cla018287
	GO:0042044	fluid transport	5/703	23/10951	0.0137372	0.375303	0.361112	Cla007455/Cla017592/Cla018285/Cla018286/Cla018287
	GO:0009415	response to water	30/703	307/10951	0.0139594	0.375303	0.361112	Cla000198/Cla000388/Cla002277/Cla005187/Cla006079/Cla006906/Cla007635/Cla008907/Cla009145/Cla010184/Cla014571/Cla016088/Cla016474/Cla017036/Cla017037/Cla017151/Cla017383/Cla017592/Cla018026/Cla018285/Cla018286/Cla018287/Cla018715/Cla018984/Cla020077/Cla020608/Cla021121/Cla021361/Cla021643/Cla022916
	GO:0051273	beta-glucan metabolic process	13/703	103/10951	0.0143617	0.375303	0.361112	Cla004767/Cla004768/Cla004771/Cla010447/Cla010816/Cla011374/Cla012478/Cla012820/Cla012972/Cla015101/Cla016279/Cla017383/Cla020445
	GO:0006073	cellular glucan metabolic process	21/703	196/10951	0.0143618	0.375303	0.361112	Cla001732/Cla004767/Cla004768/Cla004771/Cla006789/Cla007008/Cla007635/Cla010447/Cla010816/Cla011374/Cla012478/Cla012820/Cla012972/Cla015101/Cla016279/Cla017093/Cla017383/Cla018813/Cla018814/Cla018816/Cla020445
	GO:0044042	glucan metabolic process	21/703	196/10951	0.0143618	0.375303	0.361112	Cla001732/Cla004767/Cla004768/Cla004771/Cla006789/Cla007008/Cla007635/Cla010447/Cla010816/Cla011374/Cla012478/Cla012820/Cla012972/Cla015101/Cla016279/Cla017093/Cla017383/Cla018813/Cla018814/Cla018816/Cla020445
	GO:0016054	organic acid catabolic process	14/703	115/10951	0.0152599	0.380297	0.365918	Cla001290/Cla004982/Cla005457/Cla006580/Cla010665/Cla011126/Cla013371/Cla013546/Cla014085/Cla016474/Cla016612/Cla018297/Cla020673/Cla023356
	GO:0046395	carboxylic acid catabolic process	14/703	115/10951	0.0152599	0.380297	0.365918	Cla001290/Cla004982/Cla005457/Cla006580/Cla010665/Cla011126/Cla013371/Cla013546/Cla014085/Cla016474/Cla016612/Cla018297/Cla020673/Cla023356
	GO:0071669	plant-type cell wall organization or biogenesis	22/703	210/10951	0.0158104	0.380297	0.365918	Cla000585/Cla000802/Cla006197/Cla006220/Cla006356/Cla007455/Cla008705/Cla009156/Cla009165/Cla010196/Cla010447/Cla010816/Cla011551/Cla011554/Cla012820/Cla012972/Cla017329/Cla017383/Cla017829/Cla017965/Cla018814/Cla022168
	GO:0044247	cellular polysaccharide catabolic process	7/703	42/10951	0.0164374	0.380297	0.365918	Cla006789/Cla007635/Cla011374/Cla012478/Cla015101/Cla016279/Cla017093
	GO:0009768	photosynthesis, light harvesting in photosystem I	4/703	16/10951	0.016475	0.380297	0.365918	Cla000152/Cla012368/Cla017325/Cla022963
	GO:0055062	phosphate ion homeostasis	4/703	16/10951	0.016475	0.380297	0.365918	Cla002166/Cla002345/Cla009619/Cla018105
	GO:0072506	trivalent inorganic anion homeostasis	4/703	16/10951	0.016475	0.380297	0.365918	Cla002166/Cla002345/Cla009619/Cla018105
	GO:0010431	seed maturation	8/703	52/10951	0.016946	0.384758	0.37021	Cla002640/Cla008212/Cla008907/Cla013228/Cla015138/Cla017036/Cla017037/Cla018715
	GO:0019725	cellular homeostasis	25/703	249/10951	0.0173266	0.387055	0.37242	Cla002161/Cla002166/Cla002632/Cla002895/Cla003275/Cla004162/Cla004163/Cla007427/Cla010144/Cla011415/Cla013822/Cla014443/Cla014691/Cla017331/Cla018105/Cla018715/Cla019374/Cla019421/Cla019788/Cla020451/Cla020871/Cla021715/Cla022451/Cla022682/Cla023129
	GO:0009414	response to water deprivation	29/703	303/10951	0.0199786	0.439212	0.422605	Cla000198/Cla000388/Cla002277/Cla005187/Cla006079/Cla006906/Cla007635/Cla008907/Cla009145/Cla010184/Cla016088/Cla016474/Cla017036/Cla017037/Cla017151/Cla017383/Cla017592/Cla018026/Cla018285/Cla018286/Cla018287/Cla018715/Cla018984/Cla020077/Cla020608/Cla021121/Cla021361/Cla021643/Cla022916
	GO:0009063	cellular amino acid catabolic process	8/703	54/10951	0.0209539	0.453455	0.436309	Cla006580/Cla011126/Cla013371/Cla013546/Cla016474/Cla016612/Cla018297/Cla023356
	GO:0021700	developmental maturation	18/703	168/10951	0.0222979	0.468616	0.450897	Cla000228/Cla001988/Cla002640/Cla006197/Cla006634/Cla008212/Cla008907/Cla010201/Cla012528/Cla013228/Cla014414/Cla015138/Cla016287/Cla017036/Cla017037/Cla017821/Cla018715/Cla022922
	GO:0016999	antibiotic metabolic process	17/703	156/10951	0.0223312	0.468616	0.450897	Cla000765/Cla001290/Cla001847/Cla003190/Cla003191/Cla003194/Cla003196/Cla004982/Cla005187/Cla006220/Cla006356/Cla010665/Cla012240/Cla012540/Cla017829/Cla020649/Cla021932
	GO:0042445	hormone metabolic process	25/703	256/10951	0.0235631	0.476944	0.45891	Cla001290/Cla004982/Cla005187/Cla005397/Cla005457/Cla006048/Cla006634/Cla006913/Cla008733/Cla009130/Cla009774/Cla009871/Cla010665/Cla011205/Cla014085/Cla014414/Cla016287/Cla016833/Cla017773/Cla019586/Cla020649/Cla020673/Cla020828/Cla022558/Cla022623
	GO:0031668	cellular response to extracellular stimulus	15/703	134/10951	0.0247599	0.476944	0.45891	Cla000310/Cla000753/Cla004962/Cla006686/Cla008875/Cla009619/Cla012239/Cla012617/Cla013371/Cla015138/Cla016674/Cla016705/Cla019943/Cla020350/Cla021436
	GO:0030243	cellulose metabolic process	10/703	77/10951	0.0248409	0.476944	0.45891	Cla010447/Cla010816/Cla011374/Cla012478/Cla012820/Cla012972/Cla015101/Cla016279/Cla017383/Cla020445
	GO:0009074	aromatic amino acid family catabolic process	4/703	18/10951	0.02502	0.476944	0.45891	Cla006580/Cla013546/Cla018297/Cla023356
	GO:0072505	divalent inorganic anion homeostasis	4/703	18/10951	0.02502	0.476944	0.45891	Cla002166/Cla002345/Cla009619/Cla018105
	GO:0030162	regulation of proteolysis	6/703	36/10951	0.0255989	0.476944	0.45891	Cla001439/Cla002572/Cla003508/Cla012895/Cla014022/Cla018630
	GO:0008645	hexose transmembrane transport	7/703	46/10951	0.0261716	0.476944	0.45891	Cla004162/Cla004163/Cla018702/Cla019564/Cla019566/Cla021643/Cla021693
	GO:0042537	benzene-containing compound metabolic process	7/703	46/10951	0.0261716	0.476944	0.45891	Cla001290/Cla004982/Cla005187/Cla006580/Cla010665/Cla018297/Cla020649
	GO:0046323	glucose import	7/703	46/10951	0.0261716	0.476944	0.45891	Cla004162/Cla004163/Cla018702/Cla019564/Cla019566/Cla021643/Cla021693
	GO:1904659	glucose transmembrane transport	7/703	46/10951	0.0261716	0.476944	0.45891	Cla004162/Cla004163/Cla018702/Cla019564/Cla019566/Cla021643/Cla021693
	GO:0010200	response to chitin	13/703	112/10951	0.0270243	0.484327	0.466014	Cla005614/Cla007307/Cla009289/Cla010037/Cla012621/Cla013063/Cla013282/Cla013979/Cla015003/Cla016088/Cla018026/Cla018059/Cla020608
	GO:0009064	glutamine family amino acid metabolic process	9/703	68/10951	0.0290185	0.484327	0.466014	Cla011866/Cla012019/Cla013371/Cla015337/Cla015439/Cla016179/Cla016474/Cla016612/Cla019776
	GO:0015749	monosaccharide transmembrane transport	7/703	47/10951	0.0291116	0.484327	0.466014	Cla004162/Cla004163/Cla018702/Cla019564/Cla019566/Cla021643/Cla021693
	GO:0015850	organic hydroxy compound transport	3/703	11/10951	0.0294831	0.484327	0.466014	Cla016406/Cla019564/Cla019566
	GO:0032973	amino acid export across plasma membrane	3/703	11/10951	0.0294831	0.484327	0.466014	Cla010795/Cla013951/Cla021053
	GO:0140115	export across plasma membrane	3/703	11/10951	0.0294831	0.484327	0.466014	Cla010795/Cla013951/Cla021053
	GO:1905177	tracheary element differentiation	3/703	11/10951	0.0294831	0.484327	0.466014	Cla011248/Cla011554/Cla021972
	GO:0044264	cellular polysaccharide metabolic process	24/703	249/10951	0.0299483	0.484327	0.466014	Cla001732/Cla004767/Cla004768/Cla004771/Cla006789/Cla007008/Cla007635/Cla008705/Cla009165/Cla010447/Cla010816/Cla011374/Cla011477/Cla012478/Cla012820/Cla012972/Cla015101/Cla016279/Cla017093/Cla017383/Cla018813/Cla018814/Cla018816/Cla020445
	GO:0030245	cellulose catabolic process	4/703	19/10951	0.0301262	0.484327	0.466014	Cla011374/Cla012478/Cla015101/Cla016279
	GO:1903959	regulation of anion transmembrane transport	4/703	19/10951	0.0301262	0.484327	0.466014	Cla009619/Cla010795/Cla015714/Cla021053
	GO:0016051	carbohydrate biosynthetic process	27/703	288/10951	0.0304234	0.484327	0.466014	Cla004767/Cla004768/Cla004771/Cla006270/Cla007008/Cla007150/Cla008705/Cla009165/Cla010447/Cla010816/Cla011244/Cla011477/Cla012198/Cla012820/Cla012972/Cla014155/Cla014161/Cla014481/Cla014489/Cla016609/Cla016892/Cla017383/Cla019181/Cla020400/Cla020445/Cla021436/Cla022086
	GO:0006855	drug transmembrane transport	8/703	58/10951	0.0308992	0.486311	0.467923	Cla006209/Cla011528/Cla013360/Cla017821/Cla018950/Cla019435/Cla022122/Cla022847
	GO:1901615	organic hydroxy compound metabolic process	23/703	238/10951	0.0322211	0.498945	0.480079	Cla001290/Cla002166/Cla002942/Cla003169/Cla003615/Cla004982/Cla005187/Cla005404/Cla005457/Cla008842/Cla009766/Cla010037/Cla010665/Cla011244/Cla014161/Cla014190/Cla014489/Cla015970/Cla017773/Cla020649/Cla020673/Cla022558/Cla023356
	GO:0009312	oligosaccharide biosynthetic process	6/703	38/10951	0.0325825	0.498945	0.480079	Cla006270/Cla012198/Cla014155/Cla014481/Cla019181/Cla022086
	GO:0006979	response to oxidative stress	26/703	277/10951	0.0327827	0.498945	0.480079	Cla001847/Cla002572/Cla003190/Cla003191/Cla003194/Cla003196/Cla004677/Cla006220/Cla006356/Cla006580/Cla008700/Cla010144/Cla012240/Cla012545/Cla013282/Cla014022/Cla016088/Cla017829/Cla018630/Cla018648/Cla018715/Cla019421/Cla020608/Cla021932/Cla022086/Cla022659
