# Supplementary material for: Comparative analysis of primary metabolites and transcriptome changes between ungrafted and pumpkin-grafted watermelon during fruit development
Source: PeerJ. 2020 Jan 6;8:e8259. doi: 10.7717/peerj.8259 (PMC6951286; doi:10.7717/peerj.8259)
Supplement: Supplemental Information 12 [file peerj-08-8259-s012.xlsx]

## Sheet: TableS10
Table S10: The KEGG Pathways represented by all the DEGs (Differentially expressed genes).
#Kegg_pathway	ko_id	Cluter_frequency	Genome_frequency	P-value	Corrected_P-valueGeneID	KEGG Orthology
Estrogen signaling pathway	ko04915	13 out of 317 4.10094637223975%	41 out of 5269 0.778136268741697%	4.03099e-07	8.54571e-05	Cla008397;Cla017644;Cla021803;Cla022563;Cla022566;Cla010322;Cla018221;Cla004677;Cla004683;Cla005202;Cla008298;Cla019809;Cla022702	K01379+K01379+K02183+K02183+K02183+K02183+K03283+K03283+K03283+K04079+K04371+K04450+K22455
Plant hormone signal transduction	ko04075	33 out of 317 10.410094637224%	263 out of 5269 4.99145947997722%	3.48611e-05	0.00739056	Cla006692;Cla006693;Cla001487;Cla001067;Cla008649;Cla014501;Cla023102;Cla020420;Cla012315;Cla012686;Cla015414;Cla013990;Cla007389;Cla013110;Cla014274;Cla016621;Cla013463;Cla015857;Cla008029;Cla006646;Cla014721;Cla013228;Cla008212;Cla004243;Cla006233;Cla012597;Cla022558;Cla019641;Cla018813;Cla018814;Cla018816;Cla016702;Cla002749	K13422+K13422+K13464+K14431+K14431+K14431+K14484+K14484+K14484+K14484+K14484+K14487+K14487+K14487+K14488+K14488+K14488+K14488+K14488+K14488+K14493+K14494+K14497+K14497+K14497+K14497+K14499+K14503+K14504+K14504+K14504+K14515+K16189
Starch and sucrose metabolism	ko00500	23 out of 317 7.25552050473186%	177 out of 5269 3.35927120895806%	0.000334931	0.0710054	Cla018637;Cla012198;Cla007008;Cla014155;Cla006270;Cla014481;Cla022086;Cla007635;Cla003589;Cla011374;Cla012478;Cla015101;Cla016279;Cla002909;Cla011559;Cla017674;Cla015574;Cla011369;Cla011370;Cla019181;Cla011513;Cla009776;Cla004017	K00695+K00696+K00847+K01087+K01087+K01087+K01087+K01177+K01179+K01179+K01179+K01179+K01179+K01188+K01193+K01193+K01193+K01194+K01194+K16055+K18447+K19891+K19891
Nitrogen metabolism	ko00910	8 out of 317 2.52365930599369%	35 out of 5269 0.664262668438034%	0.000883315	0.187263	Cla010086;Cla022161;Cla017687;Cla017784;Cla018328;Cla019776;Cla018338;Cla023145	K01673+K01673+K01674+K01674+K01674+K01915+K01915+K10534
Photosynthesis	ko00195	8 out of 317 2.52365930599369%	36 out of 5269 0.683241601821978%	0.00107738	0.228404	Cla019380;Cla007419;Cla021628;Cla007871;Cla005429;Cla010005;Cla019423;Cla007741	K02115+K02638+K02639+K02693+K02717+K02723+K08901+K08902
Aldosterone synthesis and secretion	ko04925	5 out of 317 1.57728706624606%	15 out of 5269 0.284684000759157%	0.00138891	0.294448	Cla021803;Cla022563;Cla022566;Cla010322;Cla019809	K02183+K02183+K02183+K02183+K04450
GnRH signaling pathway	ko04912	6 out of 317 1.89274447949527%	24 out of 5269 0.455494401214652%	0.0024146	0.511896	Cla012617;Cla021803;Cla022563;Cla022566;Cla010322;Cla008298	K01115+K02183+K02183+K02183+K02183+K04371
Bile secretion	ko04976	8 out of 317 2.52365930599369%	41 out of 5269 0.778136268741697%	0.0026153	0.554443	Cla015723;Cla009733;Cla022922;Cla010534;Cla009818;Cla017419;Cla004220;Cla007820	K00021+K05658+K05658+K05658+K05666+K05666+K05666+K05681
Plant-pathogen interaction	ko04626	19 out of 317 5.99369085173502%	158 out of 5269 2.99867147466312%	0.0027444	0.581812	Cla021803;Cla022563;Cla022566;Cla010322;Cla005202;Cla004902;Cla008732;Cla013661;Cla018026;Cla013424;Cla000765;Cla016954;Cla020184;Cla020738;Cla007536;Cla018929;Cla019269;Cla010842;Cla013901	K02183+K02183+K02183+K02183+K04079+K05391+K05391+K13412+K13424+K13434+K13447+K13448+K13448+K13448+K13448+K13448+K13448+K13448+K13448
Rap1 signaling pathway	ko04015	6 out of 317 1.89274447949527%	25 out of 5269 0.474473334598596%	0.00301924	0.640078	Cla021803;Cla022563;Cla022566;Cla010322;Cla008298;Cla012645	K02183+K02183+K02183+K02183+K04371+K05759
Salivary secretion	ko04970	4 out of 317 1.26182965299685%	11 out of 5269 0.208768267223382%	0.00302581	0.641472	Cla021803;Cla022563;Cla022566;Cla010322	K02183+K02183+K02183+K02183
Phototransduction	ko04744	4 out of 317 1.26182965299685%	11 out of 5269 0.208768267223382%	0.00302581	0.641472	Cla021803;Cla022563;Cla022566;Cla010322	K02183+K02183+K02183+K02183
Carotenoid biosynthesis	ko00906	8 out of 317 2.52365930599369%	42 out of 5269 0.797115202125641%	0.00306553	0.649893	Cla003169;Cla002942;Cla005404;Cla017659;Cla003230;Cla020673;Cla005457;Cla017416	K02291+K09840+K09840+K09841+K09841+K09843+K09843+K14593
Cutin, suberine and wax biosynthesis	ko00073	7 out of 317 2.20820189274448%	35 out of 5269 0.664262668438034%	0.00415986	0.881889	Cla001679;Cla017434;Cla001235;Cla021361;Cla021362;Cla008498;Cla007615	K13356+K13407+K15398+K15404+K15404+K15405+K17991
Gastric acid secretion	ko04971	4 out of 317 1.26182965299685%	12 out of 5269 0.227747200607326%	0.00432587	0.917085	Cla021803;Cla022563;Cla022566;Cla010322	K02183+K02183+K02183+K02183
Circadian entrainment	ko04713	5 out of 317 1.57728706624606%	19 out of 5269 0.360599734294933%	0.0044065	0.934179	Cla021803;Cla022563;Cla022566;Cla010322;Cla008298	K02183+K02183+K02183+K02183+K04371
Melanogenesis	ko04916	5 out of 317 1.57728706624606%	19 out of 5269 0.360599734294933%	0.0044065	0.934179	Cla021803;Cla022563;Cla022566;Cla010322;Cla008298	K02183+K02183+K02183+K02183+K04371
Olfactory transduction	ko04740	4 out of 317 1.26182965299685%	13 out of 5269 0.24672613399127%	0.00595608	1	Cla021803;Cla022563;Cla022566;Cla010322	K02183+K02183+K02183+K02183
Phototransduction - fly	ko04745	4 out of 317 1.26182965299685%	14 out of 5269 0.265705067375213%	0.00794915	1	Cla021803;Cla022563;Cla022566;Cla010322	K02183+K02183+K02183+K02183
MAPK signaling pathway - plant	ko04016	17 out of 317 5.36277602523659%	156 out of 5269 2.96071360789524%	0.0119326	1	Cla021803;Cla022563;Cla022566;Cla010322;Cla021932;Cla006692;Cla006693;Cla018026;Cla000765;Cla008212;Cla004243;Cla006233;Cla012597;Cla016702;Cla010453;Cla007455;Cla006634	K02183+K02183+K02183+K02183+K03781+K13422+K13422+K13424+K13447+K14497+K14497+K14497+K14497+K14515+K20716+K20718+K20772
Vascular smooth muscle contraction	ko04270	5 out of 317 1.57728706624606%	24 out of 5269 0.455494401214652%	0.012579	1	Cla021803;Cla022563;Cla022566;Cla010322;Cla008298	K02183+K02183+K02183+K02183+K04371
Brassinosteroid biosynthesis	ko00905	5 out of 317 1.57728706624606%	24 out of 5269 0.455494401214652%	0.012579	1	Cla020313;Cla020314;Cla020717;Cla012528;Cla012570	K15639+K15639+K20623+K20623+K20623
Relaxin signaling pathway	ko04926	2 out of 317 0.630914826498423%	4 out of 5269 0.0759157335357753%	0.0199652	1	Cla008298;Cla019809	K04371+K04450
Renin secretion	ko04924	4 out of 317 1.26182965299685%	18 out of 5269 0.341620800910989%	0.0200912	1	Cla021803;Cla022563;Cla022566;Cla010322	K02183+K02183+K02183+K02183
Diterpenoid biosynthesis	ko00904	5 out of 317 1.57728706624606%	27 out of 5269 0.512431201366483%	0.0206191	1	Cla006048;Cla009774;Cla019586;Cla005397;Cla001298	K04120+K04125+K04125+K04125+K05282
Biosynthesis of secondary metabolites	ko01110	79 out of 317 24.9211356466877%	1067 out of 5269 20.2505219206681%	0.0213874	1	Cla015723;Cla014092;Cla021951;Cla005489;Cla004691;Cla000753;Cla023399;Cla016474;Cla017829;Cla003190;Cla003194;Cla003196;Cla006220;Cla012240;Cla001847;Cla006356;Cla007521;Cla016012;Cla000287;Cla023356;Cla013546;Cla015337;Cla006334;Cla008842;Cla012617;Cla002909;Cla016179;Cla016609;Cla010078;Cla015970;Cla020445;Cla017226;Cla015298;Cla013371;Cla001476;Cla003169;Cla010297;Cla021932;Cla006048;Cla009774…	K00021+K00083+K00121+K00134+K00164+K00166+K00218+K00318+K00430+K00430+K00430+K00430+K00430+K00430+K00430+K00430+K00547+K00588+K00660+K00815+K00815+K00818+K00830+K00938+K01115+K01188+K01438+K01623+K01661+K01723+K01807+K01904+K01904+K01953+K02160+K02291+K03527+K03781+K04120+K04125+K04125+K04125+K05280+K05282+K05933+K05933+K07385+K08081+K08241+K09828+K09832+K09840+K09840+K09841+K09841+K10757+K10775+…
Long-term potentiation	ko04720	5 out of 317 1.57728706624606%	28 out of 5269 0.531410134750427%	0.0239028	1	Cla021803;Cla022563;Cla022566;Cla010322;Cla008298	K02183+K02183+K02183+K02183+K04371
Photosynthesis - antenna proteins	ko00196	4 out of 317 1.26182965299685%	19 out of 5269 0.360599734294933%	0.0242737	1	Cla022963;Cla018600;Cla017325;Cla012368	K08908+K08910+K08912+K08916
Inflammatory mediator regulation of TRP channels	ko04750	4 out of 317 1.26182965299685%	19 out of 5269 0.360599734294933%	0.0242737	1	Cla021803;Cla022563;Cla022566;Cla010322	K02183+K02183+K02183+K02183
ABC transporters	ko02010	7 out of 317 2.20820189274448%	49 out of 5269 0.929967735813247%	0.0259078	1	Cla009733;Cla022922;Cla010534;Cla009818;Cla017419;Cla004220;Cla007820	K05658+K05658+K05658+K05666+K05666+K05666+K05681
Metabolic pathways	ko01100	130 out of 317 41.0094637223975%	1888 out of 5269 35.8322262288859%	0.028033	1	Cla015723;Cla022199;Cla005239;Cla014092;Cla021951;Cla005489;Cla004691;Cla000753;Cla023399;Cla016474;Cla006508;Cla017829;Cla003190;Cla003194;Cla003196;Cla006220;Cla012240;Cla001847;Cla006356;Cla000045;Cla013627;Cla020726;Cla007078;Cla022610;Cla007521;Cla016012;Cla000287;Cla018637;Cla012198;Cla017383;Cla023356;Cla013546;Cla015337;Cla006334;Cla007008;Cla016547;Cla008842;Cla003829;Cla008967;Cla011256…	K00021+K00029+K00059+K00083+K00121+K00134+K00164+K00166+K00218+K00318+K00387+K00430+K00430+K00430+K00430+K00430+K00430+K00430+K00430+K00472+K00472+K00512+K00512+K00512+K00547+K00588+K00660+K00695+K00696+K00770+K00815+K00815+K00818+K00830+K00847+K00888+K00938+K01051+K01051+K01051+K01051+K01087+K01087+K01087+K01087+K01099+K01115+K01179+K01179+K01179+K01179+K01179+K01184+K01188+K01193+K01193+K01193+…
cAMP signaling pathway	ko04024	6 out of 317 1.89274447949527%	41 out of 5269 0.778136268741697%	0.0342228	1	Cla012617;Cla021803;Cla022563;Cla022566;Cla010322;Cla008298	K01115+K02183+K02183+K02183+K02183+K04371
Cellular senescence	ko04218	10 out of 317 3.15457413249211%	87 out of 5269 1.65116720440311%	0.0349083	1	Cla021803;Cla022563;Cla022566;Cla010322;Cla008298;Cla019788;Cla020451;Cla003898;Cla020741;Cla021601	K02183+K02183+K02183+K02183+K04371+K10752+K10752+K18753+K20858+K21776
Adrenergic signaling in cardiomyocytes	ko04261	6 out of 317 1.89274447949527%	42 out of 5269 0.797115202125641%	0.0379872	1	Cla021803;Cla022563;Cla022566;Cla010322;Cla008298;Cla019809	K02183+K02183+K02183+K02183+K04371+K04450
Flavone and flavonol biosynthesis	ko00944	3 out of 317 0.946372239747634%	13 out of 5269 0.24672613399127%	0.0393178	1	Cla019064;Cla018802;Cla014931	K05280+K10757+K13264
Tropane, piperidine and pyridine alkaloid biosynthesis	ko00960	4 out of 317 1.26182965299685%	22 out of 5269 0.417536534446764%	0.0397806	1	Cla023356;Cla013546;Cla017923;Cla012019	K00815+K00815+K08081+K14455
Antigen processing and presentation	ko04612	6 out of 317 1.89274447949527%	43 out of 5269 0.816094135509584%	0.0420059	1	Cla018221;Cla004677;Cla004683;Cla005202;Cla000827;Cla014507	K03283+K03283+K03283+K04079+K08064+K08065
Cortisol synthesis and secretion	ko04927	4 out of 317 1.26182965299685%	23 out of 5269 0.436515467830708%	0.0459531	1	Cla020726;Cla007078;Cla022610;Cla019809	K00512+K00512+K00512+K04450
Novobiocin biosynthesis	ko00401	2 out of 317 0.630914826498423%	6 out of 5269 0.113873600303663%	0.0460608	1	Cla023356;Cla013546	K00815+K00815
Phenylpropanoid biosynthesis	ko00940	18 out of 317 5.6782334384858%	198 out of 5269 3.75782881002088%	0.0505018	1	Cla014092;Cla017829;Cla003190;Cla003194;Cla003196;Cla006220;Cla012240;Cla001847;Cla006356;Cla016012;Cla002909;Cla017226;Cla015298;Cla018297;Cla014189;Cla010664;Cla009848;Cla005065	K00083+K00430+K00430+K00430+K00430+K00430+K00430+K00430+K00430+K00588+K01188+K01904+K01904+K10775+K12356+K13066+K22395+K22395
GABAergic synapse	ko04727	5 out of 317 1.57728706624606%	34 out of 5269 0.64528373505409%	0.0505531	1	Cla019776;Cla018338;Cla002877;Cla017006;Cla006527	K01915+K01915+K15015+K15015+K15015
Ras signaling pathway	ko04014	6 out of 317 1.89274447949527%	45 out of 5269 0.854052002277472%	0.0508209	1	Cla012617;Cla021803;Cla022563;Cla022566;Cla010322;Cla008298	K01115+K02183+K02183+K02183+K02183+K04371
Phenylalanine metabolism	ko00360	7 out of 317 2.20820189274448%	58 out of 5269 1.10077813626874%	0.0575015	1	Cla016012;Cla023356;Cla013546;Cla017226;Cla015298;Cla018297;Cla012019	K00588+K00815+K00815+K01904+K01904+K10775+K14455
cGMP-PKG signaling pathway	ko04022	6 out of 317 1.89274447949527%	48 out of 5269 0.910988802429303%	0.0660201	1	Cla021803;Cla022563;Cla022566;Cla010322;Cla008298;Cla019809	K02183+K02183+K02183+K02183+K04371+K04450
Sulfur metabolism	ko00920	4 out of 317 1.26182965299685%	26 out of 5269 0.493452267982539%	0.0674658	1	Cla006508;Cla014443;Cla019374;Cla021584	K00387+K05907+K05907+K13811
Glutamatergic synapse	ko04724	4 out of 317 1.26182965299685%	26 out of 5269 0.493452267982539%	0.0674658	1	Cla012617;Cla019776;Cla018338;Cla008298	K01115+K01915+K01915+K04371
Calcium signaling pathway	ko04020	5 out of 317 1.57728706624606%	37 out of 5269 0.702220535205921%	0.0685329	1	Cla021803;Cla022563;Cla022566;Cla010322;Cla020741	K02183+K02183+K02183+K02183+K20858
Ubiquinone and other terpenoid-quinone biosynthesis	ko00130	5 out of 317 1.57728706624606%	38 out of 5269 0.721199468589865%	0.0752184	1	Cla023356;Cla013546;Cla010078;Cla017226;Cla015298	K00815+K00815+K01661+K01904+K01904
Apoptosis	ko04210	4 out of 317 1.26182965299685%	27 out of 5269 0.512431201366483%	0.075613	1	Cla015901;Cla008397;Cla017644;Cla008298	K01373+K01379+K01379+K04371
Arginine biosynthesis	ko00220	5 out of 317 1.57728706624606%	39 out of 5269 0.740178401973809%	0.0822448	1	Cla015337;Cla016179;Cla019776;Cla018338;Cla012019	K00818+K01438+K01915+K01915+K14455
Alanine, aspartate and glutamate metabolism	ko00250	6 out of 317 1.89274447949527%	51 out of 5269 0.967925602581135%	0.0836038	1	Cla006334;Cla019776;Cla018338;Cla013371;Cla012019;Cla023265	K00830+K01915+K01915+K01953+K14455+K16871
Prolactin signaling pathway	ko04917	4 out of 317 1.26182965299685%	29 out of 5269 0.550389068134371%	0.0933075	1	Cla020726;Cla007078;Cla022610;Cla008298	K00512+K00512+K00512+K04371
Tyrosine metabolism	ko00350	5 out of 317 1.57728706624606%	41 out of 5269 0.778136268741697%	0.0972994	1	Cla021951;Cla023356;Cla013546;Cla012019;Cla015028	K00121+K00815+K00815+K14455+K18857
Streptomycin biosynthesis	ko00521	2 out of 317 0.630914826498423%	9 out of 5269 0.170810400455494%	0.0981572	1	Cla014161;Cla014489	K01858+K01858
Aldosterone-regulated sodium reabsorption	ko04960	1 out of 317 0.315457413249211%	2 out of 5269 0.0379578667678876%	0.116718	1	Cla008298	K04371
Galactose metabolism	ko00052	6 out of 317 1.89274447949527%	59 out of 5269 1.11975706965269%	0.141683	1	Cla011559;Cla017674;Cla015574;Cla011477;Cla023372;Cla010955	K01193+K01193+K01193+K01784+K06617+K18819
Ovarian steroidogenesis	ko04913	3 out of 317 0.946372239747634%	22 out of 5269 0.417536534446764%	0.142924	1	Cla020726;Cla007078;Cla022610	K00512+K00512+K00512
TNF signaling pathway	ko04668	2 out of 317 0.630914826498423%	12 out of 5269 0.227747200607326%	0.160104	1	Cla008298;Cla019809	K04371+K04450
Biosynthesis of terpenoids and steroids	ko01062	1 out of 317 0.315457413249211%	3 out of 5269 0.0569368001518315%	0.169879	1	Cla003169	K02291
Isoquinoline alkaloid biosynthesis	ko00950	3 out of 317 0.946372239747634%	24 out of 5269 0.455494401214652%	0.172447	1	Cla023356;Cla013546;Cla012019	K00815+K00815+K14455
Dopaminergic synapse	ko04728	5 out of 317 1.57728706624606%	50 out of 5269 0.948946669197191%	0.179934	1	Cla021803;Cla022563;Cla022566;Cla010322;Cla019809	K02183+K02183+K02183+K02183+K04450
Arginine and proline metabolism	ko00330	5 out of 317 1.57728706624606%	51 out of 5269 0.967925602581135%	0.190405	1	Cla016474;Cla000045;Cla013627;Cla016612;Cla012019	K00318+K00472+K00472+K01583+K14455
Drug metabolism - cytochrome P450	ko00982	5 out of 317 1.57728706624606%	51 out of 5269 0.967925602581135%	0.190405	1	Cla021951;Cla000480;Cla011132;Cla021338;Cla021463	K00121+K00485+K00485+K00799+K00799
Carbon fixation in photosynthetic organisms	ko00710	6 out of 317 1.89274447949527%	65 out of 5269 1.23363066995635%	0.194667	1	Cla022199;Cla005489;Cla016609;Cla020445;Cla007150;Cla012019	K00029+K00134+K01623+K01807+K05298+K14455
IL-17 signaling pathway	ko04657	2 out of 317 0.630914826498423%	14 out of 5269 0.265705067375213%	0.204431	1	Cla005202;Cla008298	K04079+K04371
Two-component system	ko02020	2 out of 317 0.630914826498423%	14 out of 5269 0.265705067375213%	0.204431	1	Cla019776;Cla018338	K01915+K01915
Phosphatidylinositol signaling system	ko04070	6 out of 317 1.89274447949527%	67 out of 5269 1.27158853672424%	0.213805	1	Cla016547;Cla017042;Cla021803;Cla022563;Cla022566;Cla010322	K00888+K01099+K02183+K02183+K02183+K02183
Monoterpenoid biosynthesis	ko00902	1 out of 317 0.315457413249211%	4 out of 5269 0.0759157335357753%	0.21985	1	Cla007779	K07385
Dorso-ventral axis formation	ko04320	1 out of 317 0.315457413249211%	4 out of 5269 0.0759157335357753%	0.21985	1	Cla008298	K04371
Retrograde endocannabinoid signaling	ko04723	4 out of 317 1.26182965299685%	42 out of 5269 0.797115202125641%	0.244424	1	Cla008298;Cla002877;Cla017006;Cla006527	K04371+K15015+K15015+K15015
Terpenoid backbone biosynthesis	ko00900	4 out of 317 1.26182965299685%	42 out of 5269 0.797115202125641%	0.244424	1	Cla015723;Cla008842;Cla010297;Cla016321	K00021+K00938+K03527+K13789
Steroid hormone biosynthesis	ko00140	3 out of 317 0.946372239747634%	29 out of 5269 0.550389068134371%	0.252154	1	Cla020726;Cla007078;Cla022610	K00512+K00512+K00512
Oxytocin signaling pathway	ko04921	5 out of 317 1.57728706624606%	57 out of 5269 1.0817992028848%	0.257192	1	Cla021803;Cla022563;Cla022566;Cla010322;Cla008298	K02183+K02183+K02183+K02183+K04371
Pentose and glucuronate interconversions	ko00040	10 out of 317 3.15457413249211%	131 out of 5269 2.48624027329664%	0.262562	1	Cla003829;Cla008967;Cla011256;Cla015102;Cla001988;Cla000802;Cla005402;Cla020532;Cla021445;Cla002940	K01051+K01051+K01051+K01051+K01184+K01213+K01213+K01728+K01728+K01728
Fat digestion and absorption	ko04975	1 out of 317 0.315457413249211%	5 out of 5269 0.0948946669197191%	0.266822	1	Cla012019	K14455
Renin-angiotensin system	ko04614	1 out of 317 0.315457413249211%	5 out of 5269 0.0948946669197191%	0.266822	1	Cla007407	K01322
Prodigiosin biosynthesis	ko00333	1 out of 317 0.315457413249211%	5 out of 5269 0.0948946669197191%	0.266822	1	Cla005239	K00059
Cholinergic synapse	ko04725	1 out of 317 0.315457413249211%	5 out of 5269 0.0948946669197191%	0.266822	1	Cla008298	K04371
Microbial metabolism in diverse environments	ko01120	22 out of 317 6.94006309148265%	318 out of 5269 6.03530081609414%	0.275257	1	Cla022199;Cla021951;Cla005489;Cla004691;Cla006508;Cla000480;Cla011132;Cla006334;Cla016609;Cla020445;Cla019776;Cla018338;Cla001476;Cla007150;Cla014443;Cla019374;Cla023145;Cla012540;Cla021584;Cla012019;Cla023265;Cla015028	K00029+K00121+K00134+K00164+K00387+K00485+K00485+K00830+K01623+K01807+K01915+K01915+K02160+K05298+K05907+K05907+K10534+K11517+K13811+K14455+K16871+K18857
Insulin secretion	ko04911	1 out of 317 0.315457413249211%	6 out of 5269 0.113873600303663%	0.310974	1	Cla019809	K04450
Zeatin biosynthesis	ko00908	2 out of 317 0.630914826498423%	19 out of 5269 0.360599734294933%	0.318314	1	Cla016833;Cla011205	K00279+K00279
Isoflavonoid biosynthesis	ko00943	2 out of 317 0.630914826498423%	19 out of 5269 0.360599734294933%	0.318314	1	Cla007077;Cla014931	K13260+K13264
Th17 cell differentiation	ko04659	2 out of 317 0.630914826498423%	19 out of 5269 0.360599734294933%	0.318314	1	Cla005202;Cla008298	K04079+K04371
Fatty acid biosynthesis	ko00061	3 out of 317 0.946372239747634%	33 out of 5269 0.626304801670146%	0.31909	1	Cla005239;Cla001476;Cla013862	K00059+K02160+K03921
Glyoxylate and dicarboxylate metabolism	ko00630	6 out of 317 1.89274447949527%	78 out of 5269 1.48035680394762%	0.328062	1	Cla006334;Cla019776;Cla018338;Cla021932;Cla012540;Cla015823	K00830+K01915+K01915+K03781+K11517+K15893
Cysteine and methionine metabolism	ko00270	7 out of 317 2.20820189274448%	94 out of 5269 1.78401973809072%	0.336141	1	Cla007521;Cla023356;Cla013546;Cla014414;Cla016287;Cla012019;Cla006634	K00547+K00815+K00815+K05933+K05933+K14455+K20772
Apelin signaling pathway	ko04371	5 out of 317 1.57728706624606%	64 out of 5269 1.2146517365724%	0.34073	1	Cla021803;Cla022563;Cla022566;Cla010322;Cla008298	K02183+K02183+K02183+K02183+K04371
Biosynthesis of antibiotics	ko01130	26 out of 317 8.2018927444795%	395 out of 5269 7.49667868665781%	0.34271	1	Cla015723;Cla005239;Cla021951;Cla005489;Cla004691;Cla000753;Cla016474;Cla023356;Cla013546;Cla015337;Cla006334;Cla008842;Cla016179;Cla016609;Cla020445;Cla014161;Cla014489;Cla001476;Cla010297;Cla021932;Cla012540;Cla016321;Cla021584;Cla011126;Cla012019;Cla015823	K00021+K00059+K00121+K00134+K00164+K00166+K00318+K00815+K00815+K00818+K00830+K00938+K01438+K01623+K01807+K01858+K01858+K02160+K03527+K03781+K11517+K13789+K13811+K14157+K14455+K15893
Naphthalene degradation	ko00626	1 out of 317 0.315457413249211%	7 out of 5269 0.132852533687607%	0.352476	1	Cla021951	K00121
Platelet activation	ko04611	1 out of 317 0.315457413249211%	7 out of 5269 0.132852533687607%	0.352476	1	Cla008298	K04371
MAPK signaling pathway - yeast	ko04011	3 out of 317 0.946372239747634%	36 out of 5269 0.683241601821978%	0.369548	1	Cla016547;Cla021932;Cla008298	K00888+K03781+K04371
Biosynthesis of unsaturated fatty acids	ko01040	2 out of 317 0.630914826498423%	22 out of 5269 0.417536534446764%	0.385211	1	Cla005239;Cla013862	K00059+K03921
Serotonergic synapse	ko04726	1 out of 317 0.315457413249211%	8 out of 5269 0.151831467071551%	0.391485	1	Cla008298	K04371
Flavonoid biosynthesis	ko00941	3 out of 317 0.946372239747634%	38 out of 5269 0.721199468589865%	0.402842	1	Cla016012;Cla000287;Cla019064	K00588+K00660+K05280
Steroid biosynthesis	ko00100	2 out of 317 0.630914826498423%	23 out of 5269 0.436515467830708%	0.406901	1	Cla010776;Cla009766	K09828+K09832
Synaptic vesicle cycle	ko04721	4 out of 317 1.26182965299685%	54 out of 5269 1.02486240273297%	0.410224	1	Cla022451;Cla002877;Cla017006;Cla006527	K02154+K15015+K15015+K15015
Glucagon signaling pathway	ko04922	5 out of 317 1.57728706624606%	71 out of 5269 1.34750427026001%	0.425949	1	Cla021803;Cla022563;Cla022566;Cla010322;Cla019809	K02183+K02183+K02183+K02183+K04450
Fc epsilon RI signaling pathway	ko04664	1 out of 317 0.315457413249211%	9 out of 5269 0.170810400455494%	0.42815	1	Cla008298	K04371
Long-term depression	ko04730	1 out of 317 0.315457413249211%	9 out of 5269 0.170810400455494%	0.42815	1	Cla008298	K04371
Mineral absorption	ko04978	1 out of 317 0.315457413249211%	9 out of 5269 0.170810400455494%	0.42815	1	Cla008202	K14686
Monobactam biosynthesis	ko00261	1 out of 317 0.315457413249211%	9 out of 5269 0.170810400455494%	0.42815	1	Cla021584	K13811
Fatty acid elongation	ko00062	3 out of 317 0.946372239747634%	40 out of 5269 0.759157335357753%	0.43562	1	Cla015919;Cla020765;Cla021577	K15397+K15397+K15397
Oocyte meiosis	ko04114	5 out of 317 1.57728706624606%	72 out of 5269 1.36648320364396%	0.43802	1	Cla021803;Cla022563;Cla022566;Cla010322;Cla008298	K02183+K02183+K02183+K02183+K04371
Insulin signaling pathway	ko04910	6 out of 317 1.89274447949527%	89 out of 5269 1.689125071171%	0.448327	1	Cla021803;Cla022563;Cla022566;Cla010322;Cla008298;Cla009145	K02183+K02183+K02183+K02183+K04371+K07195
Ether lipid metabolism	ko00565	2 out of 317 0.630914826498423%	25 out of 5269 0.474473334598596%	0.44912	1	Cla012617;Cla016524	K01115+K04628
Lysine degradation	ko00310	2 out of 317 0.630914826498423%	25 out of 5269 0.474473334598596%	0.44912	1	Cla004691;Cla011126	K00164+K14157
Sphingolipid signaling pathway	ko04071	4 out of 317 1.26182965299685%	57 out of 5269 1.0817992028848%	0.451371	1	Cla012617;Cla008397;Cla017644;Cla008298	K01115+K01379+K01379+K04371
Inositol phosphate metabolism	ko00562	5 out of 317 1.57728706624606%	74 out of 5269 1.40444107041184%	0.461982	1	Cla011244;Cla016547;Cla017042;Cla014161;Cla014489	K00469+K00888+K01099+K01858+K01858
Biotin metabolism	ko00780	1 out of 317 0.315457413249211%	10 out of 5269 0.189789333839438%	0.462614	1	Cla005239	K00059
Benzoxazinoid biosynthesis	ko00402	1 out of 317 0.315457413249211%	10 out of 5269 0.189789333839438%	0.462614	1	Cla021538	K13229
MAPK signaling pathway - fly	ko04013	4 out of 317 1.26182965299685%	58 out of 5269 1.10077813626874%	0.464891	1	Cla008298;Cla019809;Cla012645;Cla013273	K04371+K04450+K05759+K13411
Propanoate metabolism	ko00640	2 out of 317 0.630914826498423%	26 out of 5269 0.493452267982539%	0.469588	1	Cla000753;Cla001476	K00166+K02160
Fructose and mannose metabolism	ko00051	3 out of 317 0.946372239747634%	43 out of 5269 0.816094135509584%	0.483449	1	Cla007008;Cla016609;Cla011513	K00847+K01623+K18447
Methane metabolism	ko00680	3 out of 317 0.946372239747634%	45 out of 5269 0.854052002277472%	0.514244	1	Cla021951;Cla006334;Cla016609	K00121+K00830+K01623
Chloroalkane and chloroalkene degradation	ko00625	1 out of 317 0.315457413249211%	12 out of 5269 0.227747200607326%	0.525452	1	Cla021951	K00121
Signaling pathways regulating pluripotency of stem cells	ko04550	1 out of 317 0.315457413249211%	12 out of 5269 0.227747200607326%	0.525452	1	Cla008298	K04371
Vitamin B6 metabolism	ko00750	1 out of 317 0.315457413249211%	12 out of 5269 0.227747200607326%	0.525452	1	Cla015595	K13248
Thyroid hormone synthesis	ko04918	1 out of 317 0.315457413249211%	12 out of 5269 0.227747200607326%	0.525452	1	Cla019809	K04450
Phenylalanine, tyrosine and tryptophan biosynthesis	ko00400	3 out of 317 0.946372239747634%	46 out of 5269 0.873030935661416%	0.529271	1	Cla023356;Cla013546;Cla012019	K00815+K00815+K14455
Metabolism of xenobiotics by cytochrome P450	ko00980	3 out of 317 0.946372239747634%	46 out of 5269 0.873030935661416%	0.529271	1	Cla021951;Cla021338;Cla021463	K00121+K00799+K00799
Longevity regulating pathway - multiple species	ko04213	4 out of 317 1.26182965299685%	64 out of 5269 1.2146517365724%	0.543141	1	Cla018221;Cla004677;Cla004683;Cla021932	K03283+K03283+K03283+K03781
alpha-Linolenic acid metabolism	ko00592	3 out of 317 0.946372239747634%	47 out of 5269 0.89200986904536%	0.544038	1	Cla015970;Cla020785;Cla015028	K01723+K08241+K18857
Th1 and Th2 cell differentiation	ko04658	1 out of 317 0.315457413249211%	13 out of 5269 0.24672613399127%	0.554067	1	Cla008298	K04371
ErbB signaling pathway	ko04012	1 out of 317 0.315457413249211%	13 out of 5269 0.24672613399127%	0.554067	1	Cla008298	K04371
Longevity regulating pathway	ko04211	3 out of 317 0.946372239747634%	48 out of 5269 0.910988802429303%	0.558533	1	Cla021932;Cla019809;Cla018758	K03781+K04450+K07297
Carbon metabolism	ko01200	13 out of 317 4.10094637223975%	220 out of 5269 4.17536534446764%	0.569533	1	Cla022199;Cla021951;Cla005489;Cla004691;Cla006334;Cla016609;Cla020445;Cla001476;Cla021932;Cla007150;Cla012540;Cla012019;Cla015823	K00029+K00121+K00134+K00164+K00830+K01623+K01807+K02160+K03781+K05298+K11517+K14455+K15893
Lysosome	ko04142	4 out of 317 1.26182965299685%	67 out of 5269 1.27158853672424%	0.580009	1	Cla015901;Cla008397;Cla017644;Cla022451	K01373+K01379+K01379+K02154
Protein processing in endoplasmic reticulum	ko04141	10 out of 317 3.15457413249211%	171 out of 5269 3.24539760865439%	0.584935	1	Cla018221;Cla004677;Cla004683;Cla005202;Cla002277;Cla004568;Cla006565;Cla001268;Cla012373;Cla004671	K03283+K03283+K03283+K04079+K10666+K13993+K13993+K13993+K13993+K14009
Longevity regulating pathway - worm	ko04212	3 out of 317 0.946372239747634%	50 out of 5269 0.948946669197191%	0.586678	1	Cla021932;Cla015580;Cla001679	K03781+K04077+K13356
HIF-1 signaling pathway	ko04066	2 out of 317 0.630914826498423%	33 out of 5269 0.626304801670146%	0.599177	1	Cla005489;Cla008298	K00134+K04371
T cell receptor signaling pathway	ko04660	1 out of 317 0.315457413249211%	15 out of 5269 0.284684000759157%	0.60624	1	Cla008298	K04371
Collecting duct acid secretion	ko04966	1 out of 317 0.315457413249211%	15 out of 5269 0.284684000759157%	0.60624	1	Cla022451	K02154
Necroptosis	ko04217	3 out of 317 0.946372239747634%	53 out of 5269 1.00588346934902%	0.626692	1	Cla019776;Cla018338;Cla005202	K01915+K01915+K04079
2-Oxocarboxylic acid metabolism	ko01210	3 out of 317 0.946372239747634%	53 out of 5269 1.00588346934902%	0.626692	1	Cla015337;Cla016179;Cla012019	K00818+K01438+K14455
Adherens junction	ko04520	1 out of 317 0.315457413249211%	16 out of 5269 0.303662934143101%	0.629998	1	Cla008298	K04371
Osteoclast differentiation	ko04380	1 out of 317 0.315457413249211%	16 out of 5269 0.303662934143101%	0.629998	1	Cla008298	K04371
VEGF signaling pathway	ko04370	1 out of 317 0.315457413249211%	16 out of 5269 0.303662934143101%	0.629998	1	Cla008298	K04371
Autophagy - yeast	ko04138	5 out of 317 1.57728706624606%	91 out of 5269 1.72708293793889%	0.647737	1	Cla023090;Cla011629;Cla020511;Cla020512;Cla013912	K14209+K14209+K14209+K14209+K14209
Quorum sensing	ko02024	3 out of 317 0.946372239747634%	55 out of 5269 1.04384133611691%	0.651853	1	Cla020532;Cla021445;Cla002940	K01728+K01728+K01728
Natural killer cell mediated cytotoxicity	ko04650	1 out of 317 0.315457413249211%	17 out of 5269 0.322641867527045%	0.652326	1	Cla008298	K04371
Peroxisome	ko04146	4 out of 317 1.26182965299685%	74 out of 5269 1.40444107041184%	0.659022	1	Cla006334;Cla021932;Cla012540;Cla001679	K00830+K03781+K11517+K13356
Chemokine signaling pathway	ko04062	1 out of 317 0.315457413249211%	18 out of 5269 0.341620800910989%	0.673311	1	Cla008298	K04371
Gap junction	ko04540	1 out of 317 0.315457413249211%	18 out of 5269 0.341620800910989%	0.673311	1	Cla008298	K04371
TGF-beta signaling pathway	ko04350	1 out of 317 0.315457413249211%	18 out of 5269 0.341620800910989%	0.673311	1	Cla008298	K04371
Degradation of aromatic compounds	ko01220	1 out of 317 0.315457413249211%	18 out of 5269 0.341620800910989%	0.673311	1	Cla021951	K00121
Fatty acid metabolism	ko01212	3 out of 317 0.946372239747634%	57 out of 5269 1.0817992028848%	0.675783	1	Cla005239;Cla001476;Cla013862	K00059+K02160+K03921
Progesterone-mediated oocyte maturation	ko04914	2 out of 317 0.630914826498423%	38 out of 5269 0.721199468589865%	0.676263	1	Cla005202;Cla008298	K04079+K04371
Phospholipase D signaling pathway	ko04072	2 out of 317 0.630914826498423%	39 out of 5269 0.740178401973809%	0.690152	1	Cla012617;Cla008298	K01115+K04371
B cell receptor signaling pathway	ko04662	1 out of 317 0.315457413249211%	19 out of 5269 0.360599734294933%	0.693033	1	Cla008298	K04371
Circadian rhythm - plant	ko04712	2 out of 317 0.630914826498423%	40 out of 5269 0.759157335357753%	0.703548	1	Cla000287;Cla009096	K00660+K16221
Pentose phosphate pathway	ko00030	2 out of 317 0.630914826498423%	40 out of 5269 0.759157335357753%	0.703548	1	Cla016609;Cla020445	K01623+K01807
Thiamine metabolism	ko00730	1 out of 317 0.315457413249211%	20 out of 5269 0.379578667678876%	0.711568	1	Cla005283	K03146
NOD-like receptor signaling pathway	ko04621	18 out of 317 5.6782334384858%	332 out of 5269 6.30100588346935%	0.715504	1	Cla019421;Cla010144;Cla005202;Cla008298;Cla014290;Cla014320;Cla014475;Cla006549;Cla016685;Cla023296;Cla023313;Cla006764;Cla007693;Cla008161;Cla012308;Cla010821;Cla021931;Cla020741	K03671+K03671+K04079+K04371+K04733+K04733+K04733+K04733+K04733+K04733+K04733+K04733+K04733+K04733+K04733+K04733+K04733+K20858
Apoptosis - fly	ko04214	1 out of 317 0.315457413249211%	21 out of 5269 0.39855760106282%	0.728987	1	Cla008298	K04371
Retinol metabolism	ko00830	1 out of 317 0.315457413249211%	21 out of 5269 0.39855760106282%	0.728987	1	Cla021951	K00121
Butanoate metabolism	ko00650	1 out of 317 0.315457413249211%	21 out of 5269 0.39855760106282%	0.728987	1	Cla023265	K16871
Neurotrophin signaling pathway	ko04722	18 out of 317 5.6782334384858%	339 out of 5269 6.43385841715696%	0.74772	1	Cla021803;Cla022563;Cla022566;Cla010322;Cla008298;Cla014290;Cla014320;Cla014475;Cla006549;Cla016685;Cla023296;Cla023313;Cla006764;Cla007693;Cla008161;Cla012308;Cla010821;Cla021931	K02183+K02183+K02183+K02183+K04371+K04733+K04733+K04733+K04733+K04733+K04733+K04733+K04733+K04733+K04733+K04733+K04733+K04733
Tryptophan metabolism	ko00380	2 out of 317 0.630914826498423%	44 out of 5269 0.835073068893528%	0.752391	1	Cla004691;Cla021932	K00164+K03781
Fc gamma R-mediated phagocytosis	ko04666	2 out of 317 0.630914826498423%	44 out of 5269 0.835073068893528%	0.752391	1	Cla012617;Cla008298	K01115+K04371
Linoleic acid metabolism	ko00591	1 out of 317 0.315457413249211%	23 out of 5269 0.436515467830708%	0.760742	1	Cla019904	K15718
MAPK signaling pathway	ko04010	18 out of 317 5.6782334384858%	343 out of 5269 6.50977415069273%	0.765051	1	Cla018221;Cla004677;Cla004683;Cla008298;Cla019809;Cla014290;Cla014320;Cla014475;Cla006549;Cla016685;Cla023296;Cla023313;Cla006764;Cla007693;Cla008161;Cla012308;Cla010821;Cla021931	K03283+K03283+K03283+K04371+K04450+K04733+K04733+K04733+K04733+K04733+K04733+K04733+K04733+K04733+K04733+K04733+K04733+K04733
Focal adhesion	ko04510	1 out of 317 0.315457413249211%	24 out of 5269 0.455494401214652%	0.775199	1	Cla008298	K04371
Selenocompound metabolism	ko00450	1 out of 317 0.315457413249211%	25 out of 5269 0.474473334598596%	0.788786	1	Cla021584	K13811
Carbon fixation pathways in prokaryotes	ko00720	1 out of 317 0.315457413249211%	25 out of 5269 0.474473334598596%	0.788786	1	Cla001476	K02160
Stilbenoid, diarylheptanoid and gingerol biosynthesis	ko00945	1 out of 317 0.315457413249211%	25 out of 5269 0.474473334598596%	0.788786	1	Cla016012	K00588
Autophagy - animal	ko04140	3 out of 317 0.946372239747634%	69 out of 5269 1.30954640349212%	0.794114	1	Cla008397;Cla017644;Cla008298	K01379+K01379+K04371
Ascorbate and aldarate metabolism	ko00053	2 out of 317 0.630914826498423%	48 out of 5269 0.910988802429303%	0.794156	1	Cla011244;Cla016892	K00469+K19642
Porphyrin and chlorophyll metabolism	ko00860	2 out of 317 0.630914826498423%	48 out of 5269 0.910988802429303%	0.794156	1	Cla023399;Cla020690	K00218+K21480
Fatty acid degradation	ko00071	2 out of 317 0.630914826498423%	48 out of 5269 0.910988802429303%	0.794156	1	Cla021951;Cla015028	K00121+K18857
Glutathione metabolism	ko00480	3 out of 317 0.946372239747634%	70 out of 5269 1.32852533687607%	0.802129	1	Cla021338;Cla021463;Cla020009	K00799+K00799+K01255
Biosynthesis of amino acids	ko01230	10 out of 317 3.15457413249211%	206 out of 5269 3.90966027709243%	0.803864	1	Cla005489;Cla023356;Cla013546;Cla015337;Cla016179;Cla016609;Cla020445;Cla019776;Cla018338;Cla012019	K00134+K00815+K00815+K00818+K01438+K01623+K01807+K01915+K01915+K14455
Homologous recombination	ko03440	2 out of 317 0.630914826498423%	50 out of 5269 0.948946669197191%	0.812615	1	Cla009812;Cla016114	K10683+K10875
Other glycan degradation	ko00511	1 out of 317 0.315457413249211%	27 out of 5269 0.512431201366483%	0.813552	1	Cla010402	K01206
Vasopressin-regulated water reabsorption	ko04962	1 out of 317 0.315457413249211%	27 out of 5269 0.512431201366483%	0.813552	1	Cla016724	K10418
Nucleotide excision repair	ko03420	2 out of 317 0.630914826498423%	51 out of 5269 0.967925602581135%	0.82128	1	Cla001741;Cla011740	K10840+K10840
Amino sugar and nucleotide sugar metabolism	ko00520	5 out of 317 1.57728706624606%	116 out of 5269 2.20155627253748%	0.836505	1	Cla017383;Cla007008;Cla011477;Cla009165;Cla010816	K00770+K00847+K01784+K12448+K13379
FoxO signaling pathway	ko04068	2 out of 317 0.630914826498423%	53 out of 5269 1.00588346934902%	0.837542	1	Cla021932;Cla008298	K03781+K04371
Glycerophospholipid metabolism	ko00564	3 out of 317 0.946372239747634%	76 out of 5269 1.44239893717973%	0.844894	1	Cla012617;Cla018925;Cla002166	K01115+K05929+K18696
Axon guidance	ko04360	1 out of 317 0.315457413249211%	30 out of 5269 0.569368001518315%	0.845379	1	Cla008298	K04371
Regulation of actin cytoskeleton	ko04810	2 out of 317 0.630914826498423%	55 out of 5269 1.04384133611691%	0.852456	1	Cla008298;Cla012645	K04371+K05759
Toll and Imd signaling pathway	ko04624	15 out of 317 4.73186119873817%	312 out of 5269 5.92142721579047%	0.853925	1	Cla019809;Cla014290;Cla014320;Cla014475;Cla006549;Cla016685;Cla023296;Cla023313;Cla006764;Cla007693;Cla008161;Cla012308;Cla010821;Cla021931;Cla013273	K04450+K04733+K04733+K04733+K04733+K04733+K04733+K04733+K04733+K04733+K04733+K04733+K04733+K04733+K13411
Drug metabolism - other enzymes	ko00983	2 out of 317 0.630914826498423%	56 out of 5269 1.06282026950085%	0.859437	1	Cla021338;Cla021463	K00799+K00799
SNARE interactions in vesicular transport	ko04130	1 out of 317 0.315457413249211%	32 out of 5269 0.607325868286202%	0.863526	1	Cla006182	K08517
PI3K-Akt signaling pathway	ko04151	3 out of 317 0.946372239747634%	80 out of 5269 1.51831467071551%	0.868753	1	Cla005202;Cla008298;Cla019809	K04079+K04371+K04450
Phagosome	ko04145	2 out of 317 0.630914826498423%	59 out of 5269 1.11975706965269%	0.878608	1	Cla022451;Cla006182	K02154+K08517
Thyroid hormone signaling pathway	ko04919	1 out of 317 0.315457413249211%	34 out of 5269 0.64528373505409%	0.879549	1	Cla008298	K04371
Toll-like receptor signaling pathway	ko04620	14 out of 317 4.41640378548896%	302 out of 5269 5.73163788195103%	0.880724	1	Cla008298;Cla014290;Cla014320;Cla014475;Cla006549;Cla016685;Cla023296;Cla023313;Cla006764;Cla007693;Cla008161;Cla012308;Cla010821;Cla021931	K04371+K04733+K04733+K04733+K04733+K04733+K04733+K04733+K04733+K04733+K04733+K04733+K04733+K04733
Adipocytokine signaling pathway	ko04920	1 out of 317 0.315457413249211%	37 out of 5269 0.702220535205921%	0.900136	1	Cla018758	K07297
Glycolysis / Gluconeogenesis	ko00010	4 out of 317 1.26182965299685%	110 out of 5269 2.08768267223382%	0.905489	1	Cla021951;Cla005489;Cla016609;Cla015028	K00121+K00134+K01623+K18857
Sphingolipid metabolism	ko00600	1 out of 317 0.315457413249211%	39 out of 5269 0.740178401973809%	0.911872	1	Cla016524	K04628
Endocytosis	ko04144	6 out of 317 1.89274447949527%	155 out of 5269 2.94173467451129%	0.91282	1	Cla012617;Cla018221;Cla004677;Cla004683;Cla020384;Cla015436	K01115+K03283+K03283+K03283+K19476+K19476
Citrate cycle (TCA cycle)	ko00020	1 out of 317 0.315457413249211%	41 out of 5269 0.778136268741697%	0.922232	1	Cla004691	K00164
Valine, leucine and isoleucine degradation	ko00280	1 out of 317 0.315457413249211%	41 out of 5269 0.778136268741697%	0.922232	1	Cla000753	K00166
NF-kappa B signaling pathway	ko04064	13 out of 317 4.10094637223975%	301 out of 5269 5.71265894856709%	0.924901	1	Cla014290;Cla014320;Cla014475;Cla006549;Cla016685;Cla023296;Cla023313;Cla006764;Cla007693;Cla008161;Cla012308;Cla010821;Cla021931	K04733+K04733+K04733+K04733+K04733+K04733+K04733+K04733+K04733+K04733+K04733+K04733+K04733
Glycine, serine and threonine metabolism	ko00260	2 out of 317 0.630914826498423%	69 out of 5269 1.30954640349212%	0.926415	1	Cla006334;Cla015823	K00830+K15893
RNA degradation	ko03018	2 out of 317 0.630914826498423%	80 out of 5269 1.51831467071551%	0.95831	1	Cla015580;Cla017749	K04077+K13126
Pyruvate metabolism	ko00620	2 out of 317 0.630914826498423%	81 out of 5269 1.53729360409945%	0.96044	1	Cla022199;Cla001476	K00029+K02160
Oxidative phosphorylation	ko00190	2 out of 317 0.630914826498423%	82 out of 5269 1.55627253748339%	0.962465	1	Cla019380;Cla022451	K02115+K02154
AMPK signaling pathway	ko04152	2 out of 317 0.630914826498423%	84 out of 5269 1.59423040425128%	0.966222	1	Cla015723;Cla018758	K00021+K07297
mRNA surveillance pathway	ko03015	2 out of 317 0.630914826498423%	90 out of 5269 1.70810400455494%	0.975448	1	Cla017749;Cla021733	K13126+K14416
mTOR signaling pathway	ko04150	1 out of 317 0.315457413249211%	62 out of 5269 1.17669386980452%	0.979146	1	Cla008298	K04371
Cyanoamino acid metabolism	ko00460	1 out of 317 0.315457413249211%	63 out of 5269 1.19567280318846%	0.980415	1	Cla002909	K01188
Cell cycle - yeast	ko04111	1 out of 317 0.315457413249211%	64 out of 5269 1.2146517365724%	0.981608	1	Cla007232	K06670
Spliceosome	ko03040	3 out of 317 0.946372239747634%	128 out of 5269 2.42930347314481%	0.985736	1	Cla018221;Cla004677;Cla004683	K03283+K03283+K03283
Purine metabolism	ko00230	3 out of 317 0.946372239747634%	128 out of 5269 2.42930347314481%	0.985736	1	Cla009897;Cla021584;Cla011513	K01514+K13811+K18447
Glycerolipid metabolism	ko00561	1 out of 317 0.315457413249211%	69 out of 5269 1.30954640349212%	0.986568	1	Cla016674	K03715
Pyrimidine metabolism	ko00240	1 out of 317 0.315457413249211%	84 out of 5269 1.59423040425128%	0.994778	1	Cla009915	K01937
Thermogenesis	ko04714	2 out of 317 0.630914826498423%	121 out of 5269 2.2964509394572%	0.995516	1	Cla019809;Cla015439	K04450+K15109
Cell cycle	ko04110	1 out of 317 0.315457413249211%	88 out of 5269 1.67014613778706%	0.995943	1	Cla007232	K06670
Ubiquitin mediated proteolysis	ko04120	1 out of 317 0.315457413249211%	91 out of 5269 1.72708293793889%	0.996643	1	Cla009619	K10581
RNA transport	ko03013	2 out of 317 0.630914826498423%	131 out of 5269 2.48624027329664%	0.997447	1	Cla016325;Cla017749	K03113+K13126
Ribosome	ko03010	1 out of 317 0.315457413249211%	198 out of 5269 3.75782881002088%	0.999996	1	Cla018917	K02885
